# Supplementary material for: The Pattern and Distribution of Induced Mutations in J. curcas Using Reduced Representation Sequencing
Source: Front Plant Sci. 2018 Apr 23;9:524. doi: 10.3389/fpls.2018.00524 (PMC5944264; doi:10.3389/fpls.2018.00524)
Supplement: TABLE S2 — Distribution of nGBS reads in each sample and their proportion mapped to the reference. [file Table_2.XLSX]

## Sheet: Supplementary_Table 2
Sample	Raw reads	Adapter clipped reads	Restriction enzyme filter passed reads	Quality trimmed reads	mapped reads	%	Class	Mapped_Reads	Raw_Reads
MslI-A01	3136740	3136266	2215589	1874967	1691801	90.231	1.6% 1.5 h	1691801	3136740
MslI-A02	2170406	2169928	1340022	1138764	1008601	88.5698	0.8% 1.5h	1008601	2170406
MslI-A03	3870026	3869467	2793923	2355792	2137112	90.7173	0.8% 1.5h	2137112	3870026
MslI-A04	3087374	3086920	2260511	1898115	1728674	91.0732	Control	1728674	3087374
MslI-A05	3293274	3292793	2250075	1892011	1727598	91.3101	1.6% 3h	1727598	3293274
MslI-A06	2695338	2694935	1937800	1632634	1474639	90.3227	1.6% 3h	1474639	2695338
MslI-A07	2655318	2654897	1899820	1612000	1469683	91.1714	Control	1469683	2655318
MslI-A08	2583078	2582718	1663393	1402552	1272035	90.6943	0.8% 3h	1272035	2583078
MslI-A09	3125236	3124817	2342998	1974830	1813719	91.8418	0.8% 3h	1813719	3125236
MslI-A10	2541590	2541204	1794301	1512074	1387381	91.7535	0.8% 3h	1387381	2541590
MslI-A11	1626712	1626379	1166670	987309	892376	90.3847	0.8% 3h	892376	1626712
MslI-A12	3681206	3680658	2739417	2313828	2121460	91.6862	0.8% 3h	2121460	3681206
MslI-B01	2926420	2926012	2201665	1859712	1697580	91.2819	1.6% 1.5 h	1697580	2926420
MslI-B02	3457382	3456825	2548881	2150956	1970116	91.5926	0.8% 1.5h	1970116	3457382
MslI-B03	3063292	3062786	2254242	1907337	1740977	91.2779	0.8% 1.5h	1740977	3063292
MslI-B04	2587062	2586669	1877922	1579732	1429994	90.5213	1.6% 3h	1429994	2587062
MslI-B05	3139022	3138572	2231425	1899783	1732892	91.2153	1.6% 3h	1732892	3139022
MslI-B06	2791848	2791313	1916371	1614932	1460400	90.4311	1.6% 3h	1460400	2791848
MslI-B07	2684026	2683570	1923524	1625428	1482851	91.2283	Control	1482851	2684026
MslI-B08	1849934	1849633	1329747	1125042	1027027	91.2879	0.8% 3h	1027027	1849934
MslI-B09	2239490	2239126	1601292	1352938	1236192	91.3709	0.8% 3h	1236192	2239490
MslI-B10	3547048	3546521	2584595	2183364	2006530	91.9008	0.8% 3h	2006530	3547048
MslI-B11	3152192	3151723	2419925	2040558	1881613	92.2107	0.8% 3h	1881613	3152192
MslI-B12	2468606	2468254	1751220	1485476	1343729	90.4578	0.8% 3h	1343729	2468606
MslI-C01	3284950	3284471	2384398	2011221	1817375	90.3618	1.6% 1.5 h	1817375	3284950
MslI-C02	2937296	2936830	1815445	1528516	1368199	89.5116	0.8% 1.5h	1368199	2937296
MslI-C03	3396142	3395669	2365062	1989829	1797368	90.3278	0.8% 1.5h	1797368	3396142
MslI-C04	2690866	2690414	2054743	1727013	1582284	91.6197	Control	1582284	2690866
MslI-C05	3294450	3293953	2217318	1867391	1689106	90.4527	1.6% 3h	1689106	3294450
MslI-C06	1753920	1753616	1232696	1037585	939474	90.5443	1.6% 3h	939474	1753920
MslI-C07	2920084	2919642	2189129	1840871	1691409	91.8809	Control	1691409	2920084
MslI-C08	3128498	3128047	2373816	2015571	1857679	92.1664	0.8% 3h	1857679	3128498
MslI-C09	1627110	1626819	1192110	1006582	919630	91.3617	0.8% 3h	919630	1627110
MslI-C10	2996228	2995710	2207781	1863586	1704569	91.4671	0.8% 3h	1704569	2996228
MslI-C11	2481424	2481011	1802820	1514569	1379775	91.1002	0.8% 3h	1379775	2481424
MslI-C12	1994014	1993628	1460350	1224258	1117090	91.2463	0.8% 3h	1117090	1994014
MslI-D01	2737102	2736694	2011354	1697228	1546281	91.1063	1.6% 1.5 h	1546281	2737102
MslI-D02	3529958	3529398	2511729	2132699	1934250	90.6949	0.8% 1.5h	1934250	3529958
MslI-D03	2793786	2793373	2104539	1771119	1626735	91.8479	1.6% 3h	1626735	2793786
MslI-D04	2583278	2582932	1964476	1673790	1532522	91.56	1.6% 3h	1532522	2583278
MslI-D05	2918882	2918334	1921495	1615684	1451636	89.8465	1.6% 3h	1451636	2918882
MslI-D06	96300	96216	58483	49564	44477	89.7365	1.6% 3h	44477	96300
MslI-D07	2434020	2433649	1739530	1472620	1338288	90.878	Control	1338288	2434020
MslI-D08	1771098	1770751	1208917	1023511	922846	90.1647	0.8% 3h	922846	1771098
MslI-D09	2968540	2968114	2277191	1936784	1782987	92.0592	0.8% 3h	1782987	2968540
MslI-D10	2614136	2613668	1884928	1587400	1423249	89.6591	0.8% 3h	1423249	2614136
MslI-D11	2160244	2159791	1578571	1332620	1210322	90.8227	0.8% 3h	1210322	2160244
MslI-D12	2366958	2366575	1633915	1378897	1245972	90.36	0.8% 3h	1245972	2366958
MslI-E01	2741648	2741159	1887944	1590134	1434398	90.2061	1.6% 1.5 h	1434398	2741648
MslI-E02	3164190	3163630	2116294	1784548	1608103	90.1126	0.8% 1.5h	1608103	3164190
MslI-E03	2546542	2546143	1947876	1642335	1510735	91.987	0.8% 1.5h	1510735	2546542
MslI-E04	3134372	3133849	2103827	1776629	1615114	90.9089	1.6% 3h	1615114	3134372
MslI-E05	3083812	3083337	2072104	1749003	1580564	90.3694	1.6% 3h	1580564	3083812
MslI-E06	2180124	2179831	1648409	1389974	1274331	91.6802	1.6% 3h	1274331	2180124
MslI-E07	3023572	3023071	2213947	1871172	1710608	91.4191	Control	1710608	3023572
MslI-E08	2790060	2789611	2123243	1797226	1658901	92.3034	0.8% 3h	1658901	2790060
MslI-E09	3823958	3823353	2895162	2459394	2267261	92.1878	0.8% 3h	2267261	3823958
MslI-E10	3484888	3484274	2300167	1929090	1751947	90.8173	0.8% 3h	1751947	3484888
MslI-E11	2872996	2872493	2000263	1690950	1590735	94.0734	0.8% 3h	1590735	2872996
MslI-E12	3132140	3131626	2115391	1785907	1609722	90.1347	0.8% 3h	1609722	3132140
MslI-F01	2598322	2597885	1885960	1602743	1449330	90.4281	Control	1449330	2598322
MslI-F02	2652028	2651660	1828267	1552606	1413375	91.0324	0.8% 1.5h	1413375	2652028
MslI-F03	2897004	2896567	2112284	1786624	1631197	91.3005	Control	1631197	2897004
MslI-F04	2807206	2806811	2033970	1710805	1561384	91.266	0.8% 1.5h	1561384	2807206
MslI-F05	2513452	2513006	1741958	1467898	1324325	90.2191	1.6% 3h	1324325	2513452
MslI-F06	2681326	2680855	1850834	1567142	1412311	90.1202	1.6% 3h	1412311	2681326
MslI-F07	2578642	2578265	1820066	1543664	1398126	90.5719	0.8% 3h	1398126	2578642
MslI-F08	3356078	3355544	2255209	1904549	1726567	90.6549	0.8% 3h	1726567	3356078
MslI-F09	2863486	2863051	2125752	1795242	1645778	91.6744	0.8% 3h	1645778	2863486
MslI-F10	3021586	3021105	2153662	1811307	1649012	91.0399	0.8% 3h	1649012	3021586
MslI-F11	2090092	2089777	1524356	1282494	1169439	91.1848	0.8% 3h	1169439	2090092
MslI-F12	2322470	2322089	1771701	1492170	1365874	91.5361	0.8% 3h	1365874	2322470
MslI-G01	2798366	2797936	1938403	1637482	1481596	90.4801	0.8% 1.5h	1481596	2798366
MslI-G02	3376462	3375888	2432106	2054438	1871541	91.0975	0.8% 1.5h	1871541	3376462
MslI-G03	3944508	3943975	2868734	2418812	2193120	90.6693	Control	2193120	3944508
MslI-G04	1958438	1958138	1449935	1223588	1116441	91.2432	Control	1116441	1958438
MslI-G05	3251806	3251249	2240047	1881253	1694101	90.0517	1.6% 3h	1694101	3251806
MslI-G06	3014352	3013883	2307757	1937523	1784163	92.0847	1.6% 3h	1784163	3014352
MslI-G07	3213522	3213003	2332676	1965441	1789413	91.0438	0.8% 3h	1789413	3213522
MslI-G08	2461688	2461323	1697865	1437004	1309906	91.1553	0.8% 3h	1309906	2461688
MslI-G09	3730352	3729798	2748725	2318340	2126047	91.7056	0.8% 3h	2126047	3730352
MslI-G10	1861760	1861450	1305396	1099670	1000458	90.978	0.8% 3h	1000458	1861760
MslI-G11	1081330	1081108	765980	648774	594031	91.5621	0.8% 3h	594031	1081330
MslI-G12	2365074	2364703	1685253	1416009	1288875	91.0217	0.8% 3h	1288875	2365074
MslI-H01	2663020	2662631	1910690	1618768	1475985	91.1795	0.8% 1.5h	1475985	2663020
MslI-H02	2162788	2162484	1612027	1358466	1244596	91.6178	0.8% 1.5h	1244596	2162788
MslI-H03	1872736	1872359	1412987	1195496	1092073	91.3489	Control	1092073	1872736
MslI-H04	2706330	2705905	1999603	1690677	1550682	91.7196	1.6% 3h	1550682	2706330
MslI-H05	3196096	3195556	1972634	1662879	1495658	89.9439	1.6% 3h	1495658	3196096
MslI-H06	3087098	3086614	2151502	1821172	1650761	90.6428	Control	1650761	3087098
MslI-H07	2855086	2854647	2162228	1817479	1672192	92.0061	0.8% 3h	1672192	2855086
MslI-H08	1989316	1988949	1450462	1224598	1115934	91.1266	0.8% 3h	1115934	1989316
MslI-H09	3334200	3333689	2463547	2071119	1893439	91.4211	0.8% 3h	1893439	3334200
MslI-H10	2571790	2571409	1897867	1602151	1467315	91.5841	0.8% 3h	1467315	2571790
MslI-H11	3404330	3403818	2569340	2162852	1990915	92.0505	0.8% 3h	1990915	3404330
MslI-H12	2228376	2228069	1661588	1414184	1288734	91.1292	Control	1288734	2228376
