# Supplementary material for: The Pattern and Distribution of Induced Mutations in J. curcas Using Reduced Representation Sequencing
Source: Front Plant Sci. 2018 Apr 23;9:524. doi: 10.3389/fpls.2018.00524 (PMC5944264; doi:10.3389/fpls.2018.00524)
Supplement: TABLE S7 — Annotation of EMS-induced changes identified by the nGBS-based variant on annotated genes and transcripts using SnpEff. [file Table_7.XLSX]

## Sheet: Supplementary_Table 7
Reference	Position	ID	Gene GO Terms	BP	CC	MF	EC Number	KEGG pathway	KEGG Map	Reference allele	Alternate allele(s)	Variant details	Variant effect	consensus_control	MslI-A01	MslI-A02	MslI-A03	MslI-A05	MslI-A06	MslI-A08	MslI-A09	MslI-A10	MslI-A11	MslI-A12	MslI-B01	MslI-B02	MslI-B03	MslI-B04	MslI-B05	MslI-B06	MslI-B08	MslI-B09	MslI-B10	MslI-B11	MslI-B12	MslI-C01	MslI-C02	MslI-C03	MslI-C05	MslI-C06	MslI-C08	MslI-C09	MslI-C10	MslI-C11	MslI-C12	MslI-D01	MslI-D02	MslI-D03	MslI-D04
Jcr4S21566	6706	Jcr4S21566_6706	GO:0015074;GO:0003676	DNA integration	-	nucleic acid binding	-	-	-	G	A	AB=0.100125;ABP=8922.38;AC=71;AF=0.369792;AN=192;AO=734;CIGAR=1X;DP=8466;DPRA=1.85505;EPP=1579.55;EPPR=13717.1;GTI=0;HWE=138.507;LEN=1;MEANALT=1;MQM=9.83515;MQMR=8.61899;NS=96;NUMALT=1;ODDS=0;PAIRED=0;PAIREDR=0;RO=7732;RPP=1596.87;RPPR=16766.8;RUN=1;SAP=1579.55;SRP=13740.7;TYPE=snp;XAI=1.40453e-05;XAM=0.0104238;XAS=0.0104098;XRI=2.14196e-05;XRM=0.0100368;XRS=0.0100154;technology.Illumina=1;BVAR;S…	DOWNSTREAM(MODIFIER||1627||88|Jcr4S21566.20|protein_coding|CODING|Jcr4S21566.20||1);SYNONYMOUS_CODING(LOW|SILENT|ctG/ctA|L1293|1416|Jcr4S21566.10|protein_coding|CODING|Jcr4S21566.10|9|1|WARNING_TRANSCRIPT_NO_START_CODON);UPSTREAM(MODIFIER||2579||830|Jcr4S21566.30|protein_coding|CODING|Jcr4S21566.30||1)	G/G	G/G	G/G	G/G	G/G	G/G	G/G	G/G	G/G	G/G	G/G	G/G	G/G	G/G	G/G	G/G	G/G	G/G	G/G	G/G	G/G	G/G	G/G	G/G	G/G	G/G	G/G	G/G	G/G	G/G	G/G	G/G	G/G	G/G	G/G	G/A
Jcr4S21566	6732	Jcr4S21566_6732	GO:0015074;GO:0003676	DNA integration	-	nucleic acid binding	-	-	-	C	T	AB=0.100016;ABP=8756.3;AC=70;AF=0.364583;AN=192;AO=728;CIGAR=1X;DP=8450;DPRA=1.8322;EPP=1583.84;EPPR=13693.5;GTI=0;HWE=116.246;LEN=1;MEANALT=1.01064;MQM=9.90659;MQMR=8.60575;NS=96;NUMALT=1;ODDS=0;PAIRED=0;PAIREDR=0;RO=7721;RPP=1583.84;RPPR=16742.9;RUN=1;SAP=1583.84;SRP=13701.3;TYPE=snp;XAI=1.41611e-05;XAM=0.0103242;XAS=0.01031;XRI=2.14501e-05;XRM=0.0100642;XRS=0.0100428;technology.Illumina=1;BVAR…	DOWNSTREAM(MODIFIER||1601||88|Jcr4S21566.20|protein_coding|CODING|Jcr4S21566.20||1);NON_SYNONYMOUS_CODING(MODERATE|MISSENSE|gCa/gTa|A1302V|1416|Jcr4S21566.10|protein_coding|CODING|Jcr4S21566.10|9|1|WARNING_TRANSCRIPT_NO_START_CODON);UPSTREAM(MODIFIER||2553||830|Jcr4S21566.30|protein_coding|CODING|Jcr4S21566.30||1)	C/C	C/C	C/C	C/C	C/C	C/C	C/C	C/C	C/C	C/C	C/C	C/C	C/C	C/C	C/C	C/C	C/C	C/C	C/C	C/C	C/C	C/C	C/C	C/C	C/C	C/C	C/C	C/C	C/C	C/C	C/C	C/C	C/C	C/C	C/C	C/T
Jcr4S03393	6943	Jcr4S03393_6943	-	-	-	-	-	-	-	T	A	AB=0.0843415;ABP=17244.3;AC=64;AF=0.333333;AN=192;AO=1279;CIGAR=1X;DP=17917;DPRA=23.5645;EPP=2780.32;EPPR=1337.95;GTI=0;HWE=-3.0103;LEN=1;MEANALT=1.01053;MQM=2.54105;MQMR=24.3969;NS=96;NUMALT=1;ODDS=0;PAIRED=0;PAIREDR=0;RO=16636;RPP=2771.64;RPPR=35867.5;RUN=1;SAP=2771.64;SRP=1288.33;TYPE=snp;XAI=8.88478e-06;XAM=0.00934148;XAS=0.0093326;XRI=5.01973e-06;XRM=0.0041974;XRS=0.00419238;technology.Illum…	DOWNSTREAM(MODIFIER||3944||247|Jcr4S03393.20|protein_coding|CODING|Jcr4S03393.20||1);INTERGENIC(MODIFIER||||||||||1);UPSTREAM(MODIFIER||731||183|Jcr4S03393.10|protein_coding|CODING|Jcr4S03393.10||1)	T/T	T/T	T/T	T/T	T/T	T/T	T/T	T/T	T/T	T/T	T/T	T/T	T/T	T/T	T/T	T/T	T/T	T/T	T/T	T/T	T/T	T/T	T/T	T/T	T/T	T/T	T/T	T/T	T/A	T/T	T/T	T/T	T/T	T/T	T/T	T/T
Jcr4S04520	8625	Jcr4S04520_8625	-	-	-	-	-	-	-	C	T	AB=0.109252;ABP=24098.7;AC=90;AF=0.46875;AN=192;AO=2041;CIGAR=1X;DP=19217;DPRA=0;EPP=4434.99;EPPR=32713.9;GTI=0;HWE=753.559;LEN=1;MEANALT=1.05208;MQM=22.0294;MQMR=22.6911;NS=96;NUMALT=1;ODDS=0;PAIRED=0;PAIREDR=0;RO=17171;RPP=3751.36;RPPR=37289.4;RUN=1;SAP=3751.36;SRP=32713.9;TYPE=snp;XAI=1.58246e-05;XAM=0.010385;XAS=0.0103692;XRI=4.80937e-06;XRM=0.00919233;XRS=0.00918752;technology.Illumina=1;BVA…	DOWNSTREAM(MODIFIER||3992||113|Jcr4S04520.20|protein_coding|CODING|Jcr4S04520.20||1);INTERGENIC(MODIFIER||||||||||1);UPSTREAM(MODIFIER||1672||151|Jcr4S04520.30|protein_coding|CODING|Jcr4S04520.30||1);UPSTREAM(MODIFIER||28||1726|Jcr4S04520.40|protein_coding|CODING|Jcr4S04520.40||1)	C/C	C/C	C/C	C/C	C/T	C/C	C/C	C/C	C/C	C/C	C/C	C/C	C/C	C/C	C/C	C/C	C/C	C/C	C/C	C/C	C/C	C/C	C/C	C/C	C/C	C/C	C/C	C/C	C/C	C/C	C/C	C/C	C/C	C/C	C/C	C/C
Jcr4S02836	13095	Jcr4S02836_13095	-	-	-	-	-	-	-	G	A	AB=0.116134;ABP=15575.5;AC=95;AF=0.494792;AN=192;AO=1417;CIGAR=1X;DP=12238;DPRA=0;EPP=3079.99;EPPR=7820.31;GTI=0;HWE=1042.78;LEN=1;MEANALT=1.05208;MQM=0;MQMR=0;NS=96;NUMALT=1;ODDS=0;PAIRED=0;PAIREDR=0;RO=10816;RPP=3079.99;RPPR=7815.3;RUN=1;SAP=3079.99;SRP=23481;TYPE=snp;XAI=2.91017e-05;XAM=0.000731178;XAS=0.000702077;XRI=2.86144e-05;XRM=0.00909829;XRS=0.00906968;technology.Illumina=1;BVAR;SURRSEQ…	DOWNSTREAM(MODIFIER||4854||417|Jcr4S02836.70|protein_coding|CODING|Jcr4S02836.70||1);INTERGENIC(MODIFIER||||||||||1);UPSTREAM(MODIFIER||1602||206|Jcr4S02836.40|protein_coding|CODING|Jcr4S02836.40||1);UPSTREAM(MODIFIER||2726||483|Jcr4S02836.60|protein_coding|CODING|Jcr4S02836.60||1);UPSTREAM(MODIFIER||373||313|Jcr4S02836.50|protein_coding|CODING|Jcr4S02836.50||1)	G/G	G/G	G/G	G/G	G/G	G/G	G/G	G/G	G/G	G/G	G/G	G/G	G/G	G/G	G/G	G/G	G/G	G/G	G/G	G/G	G/G	G/G	G/G	G/G	G/G	G/G	G/G	G/G	./.	G/G	G/G	G/G	G/G	G/G	G/G	G/G
Jcr4S02965	3442	Jcr4S02965_3442	GO:0015074;GO:0003676	DNA integration	-	nucleic acid binding	-	-	-	G	A	AB=0.118201;ABP=16531.3;AC=93;AF=0.484375;AN=192;AO=1568;CIGAR=1X;DP=13506;DPRA=0;EPP=3407.88;EPPR=2230.15;GTI=0;HWE=911.165;LEN=1;MEANALT=1.01042;MQM=0;MQMR=0;NS=96;NUMALT=1;ODDS=0;PAIRED=0;PAIREDR=0;RO=11937;RPP=3407.88;RPPR=25233.7;RUN=1;SAP=3407.88;SRP=2031.12;TYPE=snp;XAI=0;XAM=0.0075014;XAS=0.0075014;XRI=0.00104927;XRM=0.00905428;XRS=0.00800501;technology.Illumina=1;BVAR;SURRSEQ=CTGTATTCAGT…	DOWNSTREAM(MODIFIER||3094||380|Jcr4S02965.20|protein_coding|CODING|Jcr4S02965.20||1);SYNONYMOUS_CODING(LOW|SILENT|caC/caT|H295|1054|Jcr4S02965.10|protein_coding|CODING|Jcr4S02965.10|3|1)	G/G	G/G	G/G	G/G	G/G	G/G	G/G	G/G	G/G	G/G	G/G	G/G	G/G	G/G	G/G	G/G	G/G	G/G	G/G	G/G	G/G	G/G	G/G	G/G	G/G	G/G	G/G	G/G	G/G	G/G	G/G	G/G	G/G	G/G	G/G	G/G
Jcr4S21566	6731	Jcr4S21566_6731	GO:0015074;GO:0003676	DNA integration	-	nucleic acid binding	-	-	-	G	A	AB=0.110233;ABP=9854.74;AC=84;AF=0.4375;AN=192;AO=867;CIGAR=1X;DP=8451;DPRA=9.87368;EPP=1877;EPPR=13394.5;GTI=0;HWE=508.043;LEN=1;MEANALT=1.02105;MQM=10.7301;MQMR=8.48378;NS=96;NUMALT=1;ODDS=0;PAIRED=0;PAIREDR=0;RO=7582;RPP=1885.68;RPPR=16441.1;RUN=1;SAP=1877;SRP=13402.3;TYPE=snp;XAI=0;XAM=0.000746717;XAS=0.000746717;XRI=2.3203e-05;XRM=0.0109664;XRS=0.0109432;technology.Illumina=1;BVAR;SURRSEQ=GA…	DOWNSTREAM(MODIFIER||1602||88|Jcr4S21566.20|protein_coding|CODING|Jcr4S21566.20||1);NON_SYNONYMOUS_CODING(MODERATE|MISSENSE|Gca/Aca|A1302T|1416|Jcr4S21566.10|protein_coding|CODING|Jcr4S21566.10|9|1|WARNING_TRANSCRIPT_NO_START_CODON);UPSTREAM(MODIFIER||2554||830|Jcr4S21566.30|protein_coding|CODING|Jcr4S21566.30||1)	G/G	G/G	G/G	G/G	G/G	G/G	G/G	G/G	G/G	G/G	G/G	G/G	G/G	G/G	G/G	G/G	G/G	G/G	G/G	G/G	G/G	G/G	G/G	G/G	G/G	G/G	G/G	G/G	G/G	G/G	G/G	G/G	G/G	G/G	G/G	G/G
Jcr4S06311	8260	Jcr4S06311_8260	-	-	-	-	-	-	-	C	T	AB=0.128722;ABP=26140.7;AC=95;AF=0.494792;AN=192;AO=2824;CIGAR=1X;DP=22052;DPRA=0;EPP=6126.57;EPPR=399.658;GTI=0;HWE=1042.78;LEN=1;MEANALT=1.02083;MQM=36.6682;MQMR=35.0668;NS=96;NUMALT=1;ODDS=0;PAIRED=0;PAIREDR=0;RO=19226;RPP=11.9792;RPPR=41621.6;RUN=1;SAP=11.6501;SRP=412.459;TYPE=snp;XAI=3.57684e-06;XAM=0.00074293;XAS=0.000739353;XRI=0.000769816;XRM=0.00558378;XRS=0.00481396;technology.Illumina=…	DOWNSTREAM(MODIFIER||2923||66|Jcr4S06311.40|protein_coding|CODING|Jcr4S06311.40||1);SYNONYMOUS_CODING(LOW|SILENT|Ctg/Ttg|L19|352|Jcr4S06311.30|protein_coding|CODING|Jcr4S06311.30|1|1);UPSTREAM(MODIFIER||2602||405|Jcr4S06311.20|protein_coding|CODING|Jcr4S06311.20||1)	C/C	C/C	C/T	C/C	C/C	C/C	C/C	C/C	C/C	C/C	C/C	C/C	C/C	C/C	C/C	C/C	C/C	C/C	C/C	C/C	C/C	C/C	C/C	C/C	C/C	C/C	C/C	C/C	C/C	C/C	C/C	C/C	C/C	C/C	C/C	C/C
Jcr4S07200	19765	Jcr4S07200_19765	GO:0015074;GO:0008270;GO:0003676;GO:0005515	DNA integration	-	nucleic acid binding; zinc ion binding; protein binding	-	-	-	C	T	AB=0.141911;ABP=17324.4;AC=95;AF=0.494792;AN=192;AO=2207;CIGAR=1X;DP=15561;DPRA=18.1895;EPP=4769.43;EPPR=28985.7;GTI=0;HWE=1042.78;LEN=1;MEANALT=1.03158;MQM=0;MQMR=0.00172272;NS=96;NUMALT=1;ODDS=0;PAIRED=0;PAIREDR=0;RO=13351;RPP=4769.43;RPPR=28994.3;RUN=1;SAP=4795.45;SRP=28985.7;TYPE=snp;XAI=9.43966e-06;XAM=0.0103365;XAS=0.010327;XRI=2.82249e-05;XRM=0.0106129;XRS=0.0105847;technology.Illumina=1;B…	DOWNSTREAM(MODIFIER||4410||133|Jcr4S07200.50|protein_coding|CODING|Jcr4S07200.50||1);NON_SYNONYMOUS_CODING(MODERATE|MISSENSE|gGa/gAa|G433E|1487|Jcr4S07200.40|protein_coding|CODING|Jcr4S07200.40|2|1)	C/C	C/C	C/T	C/C	C/C	C/C	C/C	C/C	C/C	C/C	C/C	C/C	C/C	C/C	C/C	C/C	C/C	C/C	C/T	C/C	C/C	C/C	C/C	C/C	C/C	C/C	C/C	C/C	C/C	C/T	C/C	C/C	C/C	C/C	C/C	C/C
Jcr4S03657	23635	Jcr4S03657_23635	-	-	-	-	-	-	-	A	G	AB=0.15405;ABP=53299.1;AC=95;AF=0.494792;AN=192;AO=7898;CIGAR=1X;DP=51278;DPRA=59.9637;EPP=17144.6;EPPR=10583.2;GTI=0;HWE=1042.78;LEN=1;MEANALT=1.02105;MQM=13.6028;MQMR=17.3387;NS=96;NUMALT=1;ODDS=0;PAIRED=0;PAIREDR=0;RO=43378;RPP=2277.14;RPPR=93997.5;RUN=1;SAP=2273.98;SRP=10650.3;TYPE=snp;XAI=9.166e-06;XAM=0.00362085;XAS=0.00361168;XRI=5.16943e-06;XRM=0.00571198;XRS=0.00570681;technology.Illumin…	DOWNSTREAM(MODIFIER||2581||77|Jcr4S03657.40|protein_coding|CODING|Jcr4S03657.40||1);DOWNSTREAM(MODIFIER||3873||1569|Jcr4S03657.30|protein_coding|CODING|Jcr4S03657.30||1);INTERGENIC(MODIFIER||||||||||1);UPSTREAM(MODIFIER||2853||68|Jcr4S03657.50|protein_coding|CODING|Jcr4S03657.50||1)	A/A	A/A	A/A	A/A	A/A	A/A	A/A	A/A	A/A	A/A	A/A	A/A	A/A	A/A	A/A	A/A	A/A	A/A	A/G	A/A	A/A	A/A	A/A	A/A	A/A	A/A	A/A	A/A	A/A	A/A	A/A	A/A	A/A	A/A	A/A	A/A
Jcr4S26658	950	Jcr4S26658_950	GO:0003676	-	-	nucleic acid binding	-	-	-	T	A	AB=0.124034;ABP=3497.2;AC=69;AF=0.359375;AN=192;AO=391;CIGAR=1X;DP=3890;DPRA=1.65495;EPP=852.056;EPPR=7555.45;GTI=0;HWE=94.7004;LEN=1;MEANALT=1.01099;MQM=17.9949;MQMR=19.7047;NS=96;NUMALT=1;ODDS=0;PAIRED=0;PAIREDR=0;RO=3498;RPP=852.056;RPPR=7598.82;RUN=1;SAP=852.056;SRP=7555.45;TYPE=snp;XAI=2.63664e-05;XAM=0.0103687;XAS=0.0103423;XRI=5.89438e-06;XRM=0.00856356;XRS=0.00855767;technology.Illumina=1…	NON_SYNONYMOUS_CODING(MODERATE|MISSENSE|caA/caT|Q416H|446|Jcr4S26658.10|protein_coding|CODING|Jcr4S26658.10|3|1|WARNING_TRANSCRIPT_NO_START_CODON)	T/T	T/T	./.	T/T	T/T	T/T	T/T	T/T	./.	T/T	T/T	T/T	T/T	T/T	T/T	T/A	T/T	T/T	T/T	T/T	T/T	T/T	T/T	T/T	T/T	T/T	T/T	T/T	./.	T/T	T/T	./.	T/T	T/T	T/T	T/T
Jcr4S26658	958	Jcr4S26658_958	GO:0003676	-	-	nucleic acid binding	-	-	-	C	T	AB=0.12378;ABP=3528.98;AC=69;AF=0.359375;AN=192;AO=393;CIGAR=1X;DP=3899;DPRA=1.6589;EPP=856.399;EPPR=7568.48;GTI=0;HWE=94.7004;LEN=1;MEANALT=1.02198;MQM=17.9949;MQMR=19.7046;NS=96;NUMALT=1;ODDS=0;PAIRED=0;PAIREDR=0;RO=3504;RPP=856.399;RPPR=7611.85;RUN=1;SAP=856.399;SRP=7568.48;TYPE=snp;XAI=2.62323e-05;XAM=0.0103678;XAS=0.0103416;XRI=5.88429e-06;XRM=0.00856668;XRS=0.0085608;technology.Illumina=1;B…	NON_SYNONYMOUS_CODING(MODERATE|MISSENSE|Gaa/Aaa|E414K|446|Jcr4S26658.10|protein_coding|CODING|Jcr4S26658.10|3|1|WARNING_TRANSCRIPT_NO_START_CODON)	C/C	C/C	./.	C/C	C/C	C/C	C/C	C/C	./.	C/C	C/C	C/C	C/C	C/C	C/C	C/T	C/C	C/C	C/C	C/C	C/C	C/C	C/C	C/C	C/C	C/C	C/C	C/C	./.	C/C	C/C	./.	C/C	C/C	C/C	C/C
Jcr4S21302	12762	Jcr4S21302_12762	-	-	-	-	-	-	-	A	C	AB=0.852028;ABP=5204.12;AC=99;AF=0.515625;AN=192;AO=4230;CIGAR=1X;DP=4951;DPRA=0;EPP=9162.3;EPPR=1551.27;GTI=0;HWE=911.165;LEN=1;MEANALT=1.08333;MQM=36.257;MQMR=37;NS=96;NUMALT=1;ODDS=0;PAIRED=0;PAIREDR=0;RO=713;RPP=9188.34;RPPR=1551.27;RUN=1;SAP=9162.3;SRP=1551.27;TYPE=snp;XAI=7.33693e-06;XAM=0.00251491;XAS=0.00250757;XRI=0;XRM=0.000771812;XRS=0.000771812;technology.Illumina=1;BVAR;SURRSEQ=TGGAT…	DOWNSTREAM(MODIFIER||3382||1461|Jcr4S21302.20|protein_coding|CODING|Jcr4S21302.20||1);NON_SYNONYMOUS_CODING(MODERATE|MISSENSE|Tct/Gct|S331A|585|Jcr4S21302.40|protein_coding|CODING|Jcr4S21302.40|4|1);UPSTREAM(MODIFIER||1469||392|Jcr4S21302.30|protein_coding|CODING|Jcr4S21302.30||1)	C/C	C/C	C/C	C/C	C/C	C/C	C/C	C/C	C/C	C/C	C/C	A/C	C/C	C/C	C/C	C/C	C/C	A/C	C/C	C/C	C/C	C/C	C/C	C/C	C/C	C/C	C/C	C/C	./.	C/C	C/C	C/C	C/C	A/C	C/C	C/C
Jcr4U32733	378	Jcr4U32733_378	GO:0008270;GO:0003676	-	-	nucleic acid binding; zinc ion binding	-	-	-	G	A	AB=0.127355;ABP=21511.2;AC=94;AF=0.494737;AN=190;AO=2286;CIGAR=1X;DP=18075;DPRA=0;EPP=65.263;EPPR=451.146;GTI=0;HWE=1030.97;LEN=1;MEANALT=1.02105;MQM=0;MQMR=0;NS=95;NUMALT=1;ODDS=0;PAIRED=0;PAIREDR=0;RO=15787;RPP=4426.66;RPPR=34275.4;RUN=1;SAP=143.079;SRP=452.139;TYPE=snp;XAI=8.88237e-06;XAM=0.000792079;XAS=0.000783196;XRI=3.38086e-06;XRM=0.00734316;XRS=0.00733978;technology.Illumina=1;BVAR;SURRS…	SYNONYMOUS_CODING(LOW|SILENT|agC/agT|S294|383|Jcr4U32733.10|protein_coding|CODING|Jcr4U32733.10|3|1)	G/G	G/G	G/G	G/G	G/G	G/G	G/G	G/G	G/G	G/G	G/G	G/G	G/G	G/G	G/G	G/G	G/G	G/G	G/G	G/G	G/G	G/G	G/G	G/G	G/G	G/G	G/G	G/G	G/G	G/G	G/G	G/G	G/G	G/G	G/G	G/G
Jcr4S16965	407	Jcr4S16965_407	-	-	-	-	-	-	-	C	T	AB=0.102556;ABP=4565.03;AC=56;AF=0.294737;AN=190;AO=433;CIGAR=1X;DP=5606;DPRA=1.3763;EPP=5.22189;EPPR=7.55141;GTI=0;HWE=-119.048;LEN=1;MEANALT=1.01064;MQM=0;MQMR=0;NS=95;NUMALT=1;ODDS=0;PAIRED=0;PAIREDR=0;RO=5172;RPP=925.966;RPPR=11233.9;RUN=1;SAP=4.45962;SRP=7.55141;TYPE=snp;XAI=4.76179e-05;XAM=0.000872612;XAS=0.000824994;XRI=4.79544e-06;XRM=0.0049308;XRS=0.00492601;technology.Illumina=1;BVAR;SU…	DOWNSTREAM(MODIFIER||87||287|Jcr4S16965.10|protein_coding|CODING|Jcr4S16965.10||1);INTERGENIC(MODIFIER||||||||||1)	C/C	C/C	C/C	C/C	C/C	C/C	C/C	C/C	C/C	C/C	C/C	C/C	C/C	C/C	C/C	C/C	C/C	C/C	C/C	C/C	C/C	C/C	C/C	C/C	C/C	C/C	C/C	C/C	C/C	C/C	C/C	C/T	C/C	C/C	C/C	C/C
Jcr4S16965	414	Jcr4S16965_414	-	-	-	-	-	-	-	G	C	AB=0.108861;ABP=6106.42;AC=75;AF=0.394737;AN=190;AO=549;CIGAR=1X;DP=5712;DPRA=0;EPP=5.89373;EPPR=3.5559;GTI=0;HWE=253.145;LEN=1;MEANALT=1.04211;MQM=0;MQMR=0.113416;NS=95;NUMALT=1;ODDS=0;PAIRED=0;PAIREDR=0;RO=5158;RPP=1195.15;RPPR=11203.5;RUN=1;SAP=5.89373;SRP=3.5559;TYPE=snp;XAI=0;XAM=0.0105153;XAS=0.0105153;XRI=8.80585e-06;XRM=0.00377463;XRS=0.00376583;technology.Illumina=1;BVAR;SURRSEQ=AGGTCTGG…	DOWNSTREAM(MODIFIER||80||287|Jcr4S16965.10|protein_coding|CODING|Jcr4S16965.10||1);INTERGENIC(MODIFIER||||||||||1)	G/G	G/G	G/G	G/G	G/G	G/G	G/G	G/G	G/G	G/G	G/G	G/G	G/G	G/G	G/G	G/G	G/G	G/G	G/G	G/G	G/G	G/G	G/G	G/G	G/G	G/C	G/G	G/G	G/G	G/G	G/G	G/G	G/G	G/G	G/G	G/G
Jcr4U28814	531	Jcr4U28814_531	-	-	-	-	-	-	-	G	A	AB=0.118767;ABP=9547.96;AC=91;AF=0.473958;AN=192;AO=911;CIGAR=1X;DP=7843;DPRA=27.5088;EPP=1786.49;EPPR=11985.9;GTI=0;HWE=802.493;LEN=1;MEANALT=1.02105;MQM=0.0987925;MQMR=7.45022;NS=96;NUMALT=1;ODDS=0;PAIRED=0;PAIREDR=0;RO=6930;RPP=1981.22;RPPR=15051.3;RUN=1;SAP=1786.49;SRP=11985.9;TYPE=snp;XAI=0;XAM=0.010126;XAS=0.010126;XRI=2.0307e-05;XRM=0.00328096;XRS=0.00326065;technology.Illumina=1;BVAR;SURR…	NON_SYNONYMOUS_CODING(MODERATE|MISSENSE|Gcc/Acc|A133T|173|Jcr4U28814.10|protein_coding|CODING|Jcr4U28814.10|1|1|WARNING_TRANSCRIPT_NO_START_CODON)	G/G	G/G	G/G	G/G	G/G	G/G	G/G	G/G	G/G	G/G	G/G	G/G	G/G	G/G	G/G	G/G	G/G	G/G	G/G	G/G	G/G	G/G	G/G	G/G	G/G	G/G	G/G	G/G	G/G	G/G	G/G	G/G	G/G	G/G	G/G	G/G
Jcr4U28814	553	Jcr4U28814_553	-	-	-	-	-	-	-	C	T	AB=0.114459;ABP=9602.26;AC=89;AF=0.463542;AN=192;AO=874;CIGAR=1X;DP=7879;DPRA=27.6351;EPP=1900.88;EPPR=11999.8;GTI=0;HWE=707.426;LEN=1;MEANALT=1;MQM=0;MQMR=7.40328;NS=96;NUMALT=1;ODDS=0;PAIRED=0;PAIREDR=0;RO=7005;RPP=1900.88;RPPR=15214.2;RUN=1;SAP=1900.88;SRP=11999.8;TYPE=snp;XAI=0;XAM=0.0102741;XAS=0.0102741;XRI=2.00896e-05;XRM=0.00342427;XRS=0.00340418;technology.Illumina=1;BVAR;SURRSEQ=GAGGGCA…	NON_SYNONYMOUS_CODING(MODERATE|MISSENSE|aCg/aTg|T140M|173|Jcr4U28814.10|protein_coding|CODING|Jcr4U28814.10|1|1|WARNING_TRANSCRIPT_NO_START_CODON)	C/C	C/C	C/C	C/C	C/C	C/C	C/C	C/C	C/C	C/C	C/C	C/C	C/C	C/C	C/C	C/C	C/C	C/C	C/C	C/C	C/C	C/C	C/C	C/C	C/C	C/C	C/C	C/C	C/C	C/C	C/C	C/C	C/C	C/C	C/C	C/C
Jcr4S06517	632	Jcr4S06517_632	-	-	-	-	-	-	-	G	A	AB=0.0993096;ABP=5254.86;AC=59;AF=0.307292;AN=192;AO=456;CIGAR=1X;DP=5952;DPRA=2.36774;EPP=993.202;EPPR=7019.63;GTI=0;HWE=-85.4943;LEN=1;MEANALT=1.03226;MQM=0;MQMR=0;NS=96;NUMALT=1;ODDS=0;PAIRED=0;PAIREDR=0;RO=5493;RPP=993.202;RPPR=11922.2;RUN=1;SAP=993.202;SRP=7026.29;TYPE=snp;XAI=2.26081e-05;XAM=0.000726179;XAS=0.000703571;XRI=0.000488204;XRM=0.0110065;XRS=0.0105183;technology.Illumina=1;BVAR;S…	INTERGENIC(MODIFIER||||||||||1);UPSTREAM(MODIFIER||4042||622|Jcr4S06517.10|protein_coding|CODING|Jcr4S06517.10||1)	G/G	G/G	G/G	G/G	G/G	G/G	G/G	G/G	G/G	G/G	G/G	G/G	G/G	G/G	G/G	G/G	G/G	G/G	G/G	G/G	G/G	G/G	G/G	G/G	G/G	G/G	G/G	G/G	G/G	G/G	G/G	G/G	G/G	G/G	G/G	G/G
Jcr4S09662	718	Jcr4S09662_718	-	-	-	-	-	-	-	C	T	AB=0.114711;ABP=17155.9;AC=94;AF=0.489583;AN=192;AO=1536;CIGAR=1X;DP=13495;DPRA=20.2827;EPP=3338.39;EPPR=20.1294;GTI=0;HWE=972.993;LEN=1;MEANALT=1.04211;MQM=0;MQMR=0;NS=96;NUMALT=1;ODDS=0;PAIRED=0;PAIREDR=0;RO=11955;RPP=3321.04;RPPR=25954.3;RUN=1;SAP=3321.04;SRP=20.3532;TYPE=snp;XAI=1.34235e-05;XAM=0.000727507;XAS=0.000714083;XRI=0.00223404;XRM=0.00595755;XRS=0.00372351;technology.Illumina=1;BVAR…	DOWNSTREAM(MODIFIER||2168||164|Jcr4S09662.10|protein_coding|CODING|Jcr4S09662.10||1);INTERGENIC(MODIFIER||||||||||1)	C/C	C/C	C/C	C/C	C/C	C/C	C/C	C/C	C/C	C/T	C/C	C/C	C/C	C/C	C/C	C/C	C/C	C/C	C/C	C/C	C/C	C/C	C/C	C/C	C/C	C/C	C/C	C/C	C/C	C/C	C/C	C/C	C/C	C/C	C/C	C/C
Jcr4S24806	752	Jcr4S24806_752	-	-	-	-	-	-	-	C	T	AB=0.114115;ABP=5840.09;AC=81;AF=0.421875;AN=192;AO=551;CIGAR=1X;DP=5397;DPRA=1.61263;EPP=1199.49;EPPR=10526;GTI=0;HWE=446.38;LEN=1;MEANALT=1;MQM=0;MQMR=0;NS=96;NUMALT=1;ODDS=0;PAIRED=0;PAIREDR=0;RO=4846;RPP=1199.49;RPPR=10526;RUN=1;SAP=1199.49;SRP=10526;TYPE=snp;XAI=1.8905e-05;XAM=0.0103497;XAS=0.0103308;XRI=1.34325e-05;XRM=0.00700857;XRS=0.00699514;technology.Illumina=1;BVAR;SURRSEQ=AAATCCTTTGA…	UPSTREAM(MODIFIER||247||52|Jcr4S24806.10|protein_coding|CODING|Jcr4S24806.10||1)	C/C	C/C	C/C	C/C	C/C	C/C	C/C	C/C	C/C	C/C	C/C	C/C	C/C	C/C	C/C	C/C	C/C	C/C	C/C	C/C	C/C	C/C	C/C	C/C	C/C	C/C	C/C	C/C	C/C	C/C	C/C	C/C	C/C	C/C	C/C	C/C
Jcr4S24806	757	Jcr4S24806_757	-	-	-	-	-	-	-	C	G	AB=0.111679;ABP=5902.24;AC=81;AF=0.421875;AN=192;AO=539;CIGAR=1X;DP=5387;DPRA=1.60962;EPP=1173.43;EPPR=10521.6;GTI=0;HWE=446.38;LEN=1;MEANALT=1.04211;MQM=0;MQMR=0;NS=96;NUMALT=1;ODDS=0;PAIRED=0;PAIREDR=0;RO=4844;RPP=1173.43;RPPR=10521.6;RUN=1;SAP=1173.43;SRP=10521.6;TYPE=snp;XAI=0;XAM=0.0103506;XAS=0.0103506;XRI=1.55884e-05;XRM=0.00700842;XRS=0.00699283;technology.Illumina=1;BVAR;SURRSEQ=CTTTGATT…	UPSTREAM(MODIFIER||252||52|Jcr4S24806.10|protein_coding|CODING|Jcr4S24806.10||1)	C/C	C/C	C/C	C/C	C/C	C/C	C/C	C/C	C/C	C/C	C/C	C/C	C/C	C/C	C/C	C/C	C/C	C/C	C/C	C/C	C/C	C/C	C/C	C/C	C/C	C/C	C/C	C/C	C/C	C/C	C/C	C/C	C/C	C/C	C/C	C/C
Jcr4S13250	921	Jcr4S13250_921	-	-	-	-	-	-	-	C	T	AB=0.0982477;ABP=9363.8;AC=82;AF=0.427083;AN=192;AO=706;CIGAR=1X;DP=7808;DPRA=0;EPP=1536.07;EPPR=14364.4;GTI=0;HWE=439.45;LEN=1;MEANALT=1.01042;MQM=0;MQMR=0.00239403;NS=96;NUMALT=1;ODDS=0;PAIRED=0;PAIREDR=0;RO=7101;RPP=1536.07;RPPR=14364.4;RUN=1;SAP=1536.07;SRP=15422.6;TYPE=snp;XAI=0;XAM=0.0103801;XAS=0.0103801;XRI=1.45181e-06;XRM=0.000622288;XRS=0.000620836;technology.Illumina=1;BVAR;SURRSEQ=TGC…	DOWNSTREAM(MODIFIER||687||54|Jcr4S13250.10|protein_coding|CODING|Jcr4S13250.10||1)	C/C	C/C	C/C	C/C	C/C	C/C	C/C	C/C	C/C	C/C	C/C	C/C	C/C	C/C	C/C	C/C	C/C	C/C	C/C	C/C	C/C	C/C	C/C	C/C	C/C	C/C	C/C	C/C	C/C	C/C	C/C	C/C	C/C	C/C	C/C	C/C
Jcr4U31811	1003	Jcr4U31811_1003	-	-	-	-	-	-	-	G	A	AB=0.108025;ABP=4326.92;AC=61;AF=0.317708;AN=192;AO=445;CIGAR=1X;DP=5120;DPRA=0;EPP=960.649;EPPR=508.301;GTI=0;HWE=-209.254;LEN=1;MEANALT=1;MQM=0;MQMR=0;NS=96;NUMALT=1;ODDS=0;PAIRED=0;PAIREDR=0;RO=4675;RPP=772.097;RPPR=10059.3;RUN=1;SAP=764.368;SRP=487.21;TYPE=snp;XAI=2.31669e-05;XAM=0.0106347;XAS=0.0106116;XRI=0.000951192;XRM=0.0104045;XRS=0.00945326;technology.Illumina=1;BVAR;SURRSEQ=TAGTTGCGGA…	UPSTREAM(MODIFIER||877||33|Jcr4U31811.10|protein_coding|CODING|Jcr4U31811.10||1)	G/G	G/G	G/G	G/G	G/G	G/G	G/G	G/G	G/G	G/G	G/G	G/G	G/G	G/G	G/G	G/G	G/G	G/G	G/G	G/G	G/G	G/G	G/G	G/G	G/G	G/G	G/G	G/G	G/G	G/G	G/G	G/G	G/G	G/G	G/G	G/G
Jcr4U29020	1122	Jcr4U29020_1122	-	-	-	-	-	-	-	G	T	AB=0.116182;ABP=40907;AC=94;AF=0.489583;AN=192;AO=3723;CIGAR=1X;DP=32138;DPRA=169.137;EPP=3.80878;EPPR=6.34981;GTI=0;HWE=972.993;LEN=1;MEANALT=1.09474;MQM=36.9925;MQMR=36.7612;NS=96;NUMALT=1;ODDS=0;PAIRED=0;PAIREDR=0;RO=28403;RPP=8087.4;RPPR=60323.2;RUN=1;SAP=3.80878;SRP=15.9247;TYPE=snp;XAI=1.69211e-05;XAM=0.0104594;XAS=0.0104425;XRI=3.21686e-05;XRM=0.00546662;XRS=0.00543445;technology.Illumina=…	DOWNSTREAM(MODIFIER||4970||48|Jcr4U29020.20|protein_coding|CODING|Jcr4U29020.20||1);INTERGENIC(MODIFIER||||||||||1);UPSTREAM(MODIFIER||2986||405|Jcr4U29020.10|protein_coding|CODING|Jcr4U29020.10||1)	G/G	G/G	G/G	G/G	G/G	G/G	G/G	G/G	G/G	G/G	G/G	G/G	G/G	G/G	G/G	G/G	G/G	G/G	G/G	G/G	G/G	G/G	G/G	G/G	G/G	G/G	G/G	G/G	G/G	G/G	G/G	G/G	G/G	G/G	G/G	G/G
Jcr4U29020	1129	Jcr4U29020_1129	-	-	-	-	-	-	-	C	A	AB=0.115424;ABP=41338.6;AC=94;AF=0.489583;AN=192;AO=3723;CIGAR=1X;DP=32347;DPRA=170.237;EPP=7.42499;EPPR=18.1719;GTI=0;HWE=972.993;LEN=1;MEANALT=1.05263;MQM=36.9286;MQMR=36.6629;NS=96;NUMALT=1;ODDS=0;PAIRED=0;PAIREDR=0;RO=28617;RPP=7931.81;RPPR=61157.8;RUN=1;SAP=4.52736;SRP=34.7746;TYPE=snp;XAI=1.69211e-05;XAM=0.0104098;XAS=0.0103929;XRI=3.24345e-05;XRM=0.00550122;XRS=0.00546878;technology.Illumi…	DOWNSTREAM(MODIFIER||4963||48|Jcr4U29020.20|protein_coding|CODING|Jcr4U29020.20||1);INTERGENIC(MODIFIER||||||||||1);UPSTREAM(MODIFIER||2979||405|Jcr4U29020.10|protein_coding|CODING|Jcr4U29020.10||1)	C/C	C/C	C/C	C/C	C/C	C/C	C/C	C/C	C/C	C/C	C/C	C/C	C/C	C/C	C/C	C/C	C/C	C/C	C/C	C/C	C/C	C/C	C/C	C/C	C/C	C/C	C/C	C/C	C/C	C/C	C/C	C/C	C/C	C/C	C/C	C/C
Jcr4S08160	1449	Jcr4S08160_1449	-	-	-	-	-	-	-	G	T	AB=0.0980073;ABP=3454.52;AC=52;AF=0.270833;AN=192;AO=328;CIGAR=1X;DP=4520;DPRA=1.62196;EPP=715.253;EPPR=3655.3;GTI=0;HWE=-178.103;LEN=1;MEANALT=1.01087;MQM=0;MQMR=0;NS=96;NUMALT=1;ODDS=0;PAIRED=0;PAIREDR=0;RO=4191;RPP=715.253;RPPR=3655.3;RUN=1;SAP=715.253;SRP=9103.65;TYPE=snp;XAI=0;XAM=0.0103325;XAS=0.0103325;XRI=2.45986e-06;XRM=0.00537305;XRS=0.00537059;technology.Illumina=1;BVAR;SURRSEQ=TTCTACC…	INTERGENIC(MODIFIER||||||||||1)	G/G	G/G	G/G	G/G	G/G	G/G	G/G	G/G	G/G	G/G	G/G	G/G	G/G	G/G	G/G	G/G	G/G	G/G	G/G	G/G	G/G	G/T	G/G	G/G	G/G	G/G	G/G	G/G	G/G	G/G	G/G	G/G	G/G	G/G	G/G	G/G
Jcr4S16044	1539	Jcr4S16044_1539	-	-	-	-	-	-	-	A	C	AB=0.106592;ABP=14216.4;AC=89;AF=0.468421;AN=190;AO=1162;CIGAR=1X;DP=11247;DPRA=0;EPP=2526.26;EPPR=21379.6;GTI=0;HWE=742.653;LEN=1;MEANALT=1.14737;MQM=0;MQMR=0.00139013;NS=95;NUMALT=1;ODDS=0;PAIRED=0;PAIREDR=0;RO=10071;RPP=2526.26;RPPR=21871.9;RUN=1;SAP=2526.26;SRP=21379.6;TYPE=snp;XAI=0;XAM=0.00494338;XAS=0.00494338;XRI=0.000353142;XRM=0.00744608;XRS=0.00709293;technology.Illumina=1;BVAR;SURRSEQ…	DOWNSTREAM(MODIFIER||1016||173|Jcr4S16044.10|protein_coding|CODING|Jcr4S16044.10||1);DOWNSTREAM(MODIFIER||433||50|Jcr4S16044.20|protein_coding|CODING|Jcr4S16044.20||1);INTERGENIC(MODIFIER||||||||||1)	A/A	A/A	A/A	A/A	A/A	A/A	A/A	A/A	A/A	A/A	A/A	A/A	A/A	A/A	A/A	A/A	A/A	A/A	A/A	A/A	A/A	A/A	A/A	A/A	A/A	A/A	A/A	A/A	A/A	A/A	A/A	A/A	A/A	A/A	A/A	A/A
Jcr4U32497	1557	Jcr4U32497_1557	-	-	-	-	-	-	-	C	T	AB=0.0960547;ABP=12648.1;AC=83;AF=0.432292;AN=192;AO=913;CIGAR=1X;DP=10107;DPRA=21.2674;EPP=1968.23;EPPR=19898.1;GTI=0;HWE=473.078;LEN=1;MEANALT=1;MQM=17.9474;MQMR=16.624;NS=96;NUMALT=1;ODDS=0;PAIRED=0;PAIREDR=0;RO=9194;RPP=1968.23;RPPR=19932.8;RUN=1;SAP=1985.56;SRP=19932.8;TYPE=snp;XAI=0;XAM=0.0103056;XAS=0.0103056;XRI=3.65516e-06;XRM=0.0114377;XRS=0.0114341;technology.Illumina=1;BVAR;SURRSEQ=AA…	DOWNSTREAM(MODIFIER||1192||81|Jcr4U32497.10|protein_coding|CODING|Jcr4U32497.10||1);UPSTREAM(MODIFIER||84||181|Jcr4U32497.20|protein_coding|CODING|Jcr4U32497.20||1)	C/C	C/C	C/C	C/C	C/C	C/C	C/C	C/C	C/C	C/C	C/C	C/C	C/C	C/C	C/C	C/C	C/C	C/C	C/C	C/C	C/C	C/C	C/C	C/C	C/C	C/C	C/C	C/C	C/C	C/C	C/C	C/C	C/C	C/C	C/C	C/C
Jcr4S02522	1653	Jcr4S02522_1653	-	-	-	-	-	-	-	C	T	AB=0.104664;ABP=2506.28;AC=48;AF=0.252632;AN=190;AO=244;CIGAR=1X;DP=3454;DPRA=1.64724;EPP=532.85;EPPR=180.454;GTI=0;HWE=-212.846;LEN=1;MEANALT=1.02469;MQM=0;MQMR=11.6281;NS=95;NUMALT=1;ODDS=0;PAIRED=0;PAIREDR=0;RO=3208;RPP=532.85;RPPR=6865.25;RUN=1;SAP=532.85;SRP=164.208;TYPE=snp;XAI=0;XAM=0.0104597;XAS=0.0104597;XRI=1.72416e-05;XRM=0.00267951;XRS=0.00266227;technology.Illumina=1;BVAR;SURRSEQ=AAC…	INTERGENIC(MODIFIER||||||||||1);UPSTREAM(MODIFIER||1675||122|Jcr4S02522.10|protein_coding|CODING|Jcr4S02522.10||1)	C/C	C/C	C/C	C/C	C/C	C/C	C/C	C/C	C/C	./.	C/C	C/C	C/C	C/C	C/C	C/C	C/C	C/C	./.	C/C	C/C	C/C	C/C	C/C	C/C	C/C	C/C	C/C	./.	C/C	C/C	C/C	C/T	C/C	C/C	C/C
Jcr4S02522	1686	Jcr4S02522_1686	-	-	-	-	-	-	-	A	G	AB=0.102863;ABP=2586.68;AC=48;AF=0.252632;AN=190;AO=246;CIGAR=1X;DP=3529;DPRA=1.60544;EPP=519.962;EPPR=68.6406;GTI=0;HWE=-212.846;LEN=1;MEANALT=1;MQM=0.0691057;MQMR=11.1895;NS=95;NUMALT=1;ODDS=0;PAIRED=0;PAIREDR=0;RO=3283;RPP=528.542;RPPR=7131.95;RUN=1;SAP=528.542;SRP=68.6406;TYPE=snp;XAI=4.19076e-05;XAM=0.0104165;XAS=0.0103746;XRI=9.59126e-06;XRM=0.00264049;XRS=0.0026309;technology.Illumina=1;BV…	INTERGENIC(MODIFIER||||||||||1);UPSTREAM(MODIFIER||1642||122|Jcr4S02522.10|protein_coding|CODING|Jcr4S02522.10||1)	A/A	A/A	A/A	A/A	A/A	A/A	A/A	A/A	A/A	./.	A/A	A/A	A/A	A/A	A/A	A/A	A/A	A/A	./.	A/A	A/A	A/A	A/A	A/A	A/A	A/A	A/A	A/A	./.	A/A	A/A	A/A	A/G	A/A	A/A	A/A
Jcr4U32497	1730	Jcr4U32497_1730	-	-	-	-	-	-	-	C	G	AB=0.089967;ABP=9725.91;AC=54;AF=0.28125;AN=192;AO=799;CIGAR=1X;DP=11583;DPRA=30.4711;EPP=217.606;EPPR=12333.9;GTI=0;HWE=-154.226;LEN=1;MEANALT=1.02105;MQM=14.0075;MQMR=30.2116;NS=96;NUMALT=1;ODDS=0;PAIRED=0;PAIREDR=0;RO=10780;RPP=1738.02;RPPR=2193.98;RUN=1;SAP=217.606;SRP=26.571;TYPE=snp;XAI=3.50105e-05;XAM=0.0137977;XAS=0.0137627;XRI=8.33294e-06;XRM=0.0104479;XRS=0.0104396;technology.Illumina=1…	DOWNSTREAM(MODIFIER||1365||81|Jcr4U32497.10|protein_coding|CODING|Jcr4U32497.10||1);UPSTREAM(MODIFIER||257||181|Jcr4U32497.20|protein_coding|CODING|Jcr4U32497.20||1)	C/C	C/C	C/C	C/C	C/C	C/C	C/C	C/C	C/C	C/C	C/C	C/C	C/C	C/C	C/C	C/C	C/C	C/C	C/C	C/C	C/C	C/C	C/C	C/C	C/C	C/C	C/C	C/C	C/C	C/C	C/C	C/C	C/C	C/C	C/C	C/C
Jcr4S04664	1871	Jcr4S04664_1871	-	-	-	-	-	-	-	T	G	AB=0.117063;ABP=21807.6;AC=95;AF=0.494792;AN=192;AO=2004;CIGAR=1X;DP=17121;DPRA=90.1;EPP=3521.58;EPPR=32707.6;GTI=0;HWE=1042.78;LEN=1;MEANALT=1.12632;MQM=0;MQMR=0.00589209;NS=96;NUMALT=1;ODDS=0;PAIRED=0;PAIREDR=0;RO=15105;RPP=3529.39;RPPR=32803.1;RUN=1;SAP=4345.96;SRP=32707.6;TYPE=snp;XAI=1.04506e-05;XAM=0.000752114;XAS=0.000741663;XRI=1.98569e-05;XRM=0.000725086;XRS=0.000705229;technology.Illumi…	DOWNSTREAM(MODIFIER||213||304|Jcr4S04664.10|protein_coding|CODING|Jcr4S04664.10||1)	T/T	T/T	T/T	T/T	T/T	T/T	T/T	T/T	T/T	T/T	T/T	T/T	T/T	T/T	T/T	T/T	T/T	T/T	T/T	T/T	T/T	T/T	T/T	T/T	T/T	T/T	T/T	T/T	T/G	T/T	T/T	T/T	T/T	T/T	T/T	T/T
Jcr4S09785	1909	Jcr4S09785_1909	GO:0008270;GO:0003676	-	-	zinc ion binding; nucleic acid binding	-	-	-	C	T	AB=0.0933972;ABP=4200.44;AC=49;AF=0.255208;AN=192;AO=372;CIGAR=1X;DP=5541;DPRA=1.59073;EPP=810.798;EPPR=8519.15;GTI=0;HWE=-210.197;LEN=1;MEANALT=1.01099;MQM=0;MQMR=0;NS=96;NUMALT=1;ODDS=0;PAIRED=0;PAIREDR=0;RO=5168;RPP=810.798;RPPR=8519.15;RUN=1;SAP=810.798;SRP=11225.2;TYPE=snp;XAI=0;XAM=0.00619828;XAS=0.00619828;XRI=4.05243e-06;XRM=0.00965555;XRS=0.00965149;technology.Illumina=1;BVAR;SURRSEQ=ACA…	NON_SYNONYMOUS_CODING(MODERATE|MISSENSE|aGt/aAt|S599N|1204|Jcr4S09785.10|protein_coding|CODING|Jcr4S09785.10|7|1|WARNING_TRANSCRIPT_INCOMPLETE)	C/C	C/C	C/C	C/C	C/C	C/C	C/C	C/C	C/C	C/C	C/C	C/C	C/C	C/C	C/C	C/C	C/C	C/C	C/C	C/C	C/C	C/C	C/C	C/C	C/C	C/C	C/C	C/C	C/C	C/C	C/C	C/C	C/C	C/C	C/C	C/C
Jcr4S00904	1951	Jcr4S00904_1951	GO:0015074;GO:0008270;GO:0003676	DNA integration	-	nucleic acid binding; zinc ion binding	-	-	-	T	C	AB=0.157298;ABP=36968.8;AC=95;AF=0.494792;AN=192;AO=5700;CIGAR=1X;DP=36240;DPRA=127.147;EPP=6.97381;EPPR=43.9752;GTI=0;HWE=1042.78;LEN=1;MEANALT=1.03158;MQM=0;MQMR=0;NS=96;NUMALT=1;ODDS=0;PAIRED=0;PAIREDR=0;RO=30537;RPP=12380.4;RPPR=66313.3;RUN=1;SAP=6.97381;SRP=43.9752;TYPE=snp;XAI=0;XAM=0.000694764;XAS=0.000694764;XRI=4.39231e-06;XRM=0.00247549;XRS=0.00247109;technology.Illumina=1;BVAR;SURRSEQ=…	SYNONYMOUS_CODING(LOW|SILENT|agA/agG|R923|1209|Jcr4S00904.20|protein_coding|CODING|Jcr4S00904.20|4|1);UPSTREAM(MODIFIER||1763||48|Jcr4S00904.10|protein_coding|CODING|Jcr4S00904.10||1)	T/T	T/T	T/T	T/T	T/T	T/T	T/C	T/T	T/T	T/T	T/T	T/T	T/T	T/T	T/T	T/T	T/T	T/T	T/T	T/T	T/T	T/T	T/T	T/T	T/T	T/T	T/T	T/T	T/T	T/T	T/T	T/T	T/T	T/T	T/T	T/T
Jcr4S04337	1981	Jcr4S04337_1981	-	-	-	-	-	-	-	C	T	AB=0.103745;ABP=9363.07;AC=80;AF=0.416667;AN=192;AO=779;CIGAR=1X;DP=8229;DPRA=86.6105;EPP=4.48489;EPPR=21.242;GTI=0;HWE=375.859;LEN=1;MEANALT=1.06316;MQM=0;MQMR=0;NS=96;NUMALT=1;ODDS=0;PAIRED=0;PAIREDR=0;RO=7444;RPP=1575.17;RPPR=16167.5;RUN=1;SAP=10.2606;SRP=21.242;TYPE=snp;XAI=0;XAM=0.000840131;XAS=0.000840131;XRI=0.000570705;XRM=0.00609221;XRS=0.0055215;technology.Illumina=1;BVAR;SURRSEQ=GCTGTA…	DOWNSTREAM(MODIFIER||1604||124|Jcr4S04337.10|protein_coding|CODING|Jcr4S04337.10||1);DOWNSTREAM(MODIFIER||2067||1663|Jcr4S04337.20|protein_coding|CODING|Jcr4S04337.20||1);INTERGENIC(MODIFIER||||||||||1)	C/C	C/C	C/C	C/C	C/C	C/C	C/C	C/C	C/C	C/C	C/C	C/C	C/C	C/C	C/C	C/C	C/C	C/C	C/C	C/C	C/C	C/C	C/C	C/C	C/C	C/C	C/C	C/C	C/T	C/C	C/C	C/C	C/C	C/C	C/C	C/C
Jcr4S16899	2050	Jcr4S16899_2050	-	-	-	-	-	-	-	C	T	AB=0.108838;ABP=11762.1;AC=87;AF=0.457895;AN=190;AO=999;CIGAR=1X;DP=9542;DPRA=0;EPP=2172.31;EPPR=18089.9;GTI=0;HWE=653.168;LEN=1;MEANALT=1.03158;MQM=0;MQMR=0.00374707;NS=95;NUMALT=1;ODDS=0;PAIRED=0;PAIREDR=0;RO=8540;RPP=2172.31;RPPR=18089.9;RUN=1;SAP=2172.31;SRP=18547.4;TYPE=snp;XAI=0;XAM=0.00536943;XAS=0.00536943;XRI=8.58898e-06;XRM=0.00524606;XRS=0.00523747;technology.Illumina=1;BVAR;SURRSEQ=AC…	UPSTREAM(MODIFIER||603||112|Jcr4S16899.10|protein_coding|CODING|Jcr4S16899.10||1)	C/C	C/C	C/C	C/C	C/C	C/C	C/C	C/C	C/C	C/C	C/C	C/C	C/C	C/C	C/C	C/C	C/C	C/C	C/C	C/C	C/C	C/C	C/C	C/C	C/C	C/C	C/C	C/C	C/C	C/C	C/C	C/C	C/C	C/C	C/C	C/C
Jcr4S16899	2135	Jcr4S16899_2135	-	-	-	-	-	-	-	C	A	AB=0.109033;ABP=5397.4;AC=70;AF=0.364583;AN=192;AO=493;CIGAR=1X;DP=5324;DPRA=3.31039;EPP=1056.24;EPPR=10458.7;GTI=0;HWE=116.246;LEN=1;MEANALT=1;MQM=0;MQMR=0.00662389;NS=96;NUMALT=1;ODDS=0;PAIRED=0;PAIREDR=0;RO=4831;RPP=1056.24;RPPR=10493.4;RUN=1;SAP=1073.55;SRP=10458.7;TYPE=snp;XAI=0;XAM=0.000643689;XAS=0.000643689;XRI=0.00146632;XRM=0.00629855;XRS=0.00483223;technology.Illumina=1;BVAR;SURRSEQ=CC…	UPSTREAM(MODIFIER||688||112|Jcr4S16899.10|protein_coding|CODING|Jcr4S16899.10||1)	C/C	C/C	C/C	C/C	C/C	C/C	C/C	C/C	C/C	C/C	C/C	C/C	C/C	C/C	C/C	C/C	C/C	C/C	C/C	C/C	C/C	C/C	C/C	C/C	C/C	C/C	C/C	C/C	C/C	C/C	C/C	C/C	C/C	C/C	C/C	C/C
Jcr4S26843	2329	Jcr4S26843_2329	-	-	-	-	-	-	-	G	A	AB=0.11677;ABP=21567.9;AC=95;AF=0.494792;AN=192;AO=1974;CIGAR=1X;DP=16908;DPRA=59.3158;EPP=13.5751;EPPR=3.89506;GTI=0;HWE=1042.78;LEN=1;MEANALT=1.02105;MQM=0;MQMR=0.00113849;NS=96;NUMALT=1;ODDS=0;PAIRED=0;PAIREDR=0;RO=14932;RPP=3751.62;RPPR=32427.4;RUN=1;SAP=4.00033;SRP=3.89506;TYPE=snp;XAI=5.22253e-06;XAM=0.000654848;XAS=0.000649626;XRI=7.02366e-06;XRM=0.00183489;XRS=0.00182786;technology.Illumi…	DOWNSTREAM(MODIFIER||1413||413|Jcr4S26843.20|protein_coding|CODING|Jcr4S26843.20||1);INTERGENIC(MODIFIER||||||||||1);UPSTREAM(MODIFIER||106||217|Jcr4S26843.10|protein_coding|CODING|Jcr4S26843.10||1)	G/G	G/G	G/G	G/G	G/G	G/G	G/G	G/G	G/G	G/G	G/G	G/G	G/G	G/G	G/G	G/G	G/G	G/G	G/G	G/G	G/G	G/G	G/G	G/G	G/G	G/G	G/G	G/G	G/G	G/G	G/G	G/G	G/G	G/G	G/G	G/G
Jcr4S02757	2343	Jcr4S02757_2343	-	-	-	-	-	-	-	A	G	AB=0.106626;ABP=7062.12;AC=76;AF=0.395833;AN=192;AO=621;CIGAR=1X;DP=6494;DPRA=3.81678;EPP=1351.49;EPPR=65.8032;GTI=0;HWE=261.456;LEN=1;MEANALT=1.03191;MQM=0.544283;MQMR=8.33032;NS=96;NUMALT=1;ODDS=0;PAIRED=0;PAIREDR=0;RO=5870;RPP=1351.49;RPPR=12611;RUN=1;SAP=1351.49;SRP=56.4278;TYPE=snp;XAI=0;XAM=0.00464039;XAS=0.00464039;XRI=7.07995e-06;XRM=0.00731893;XRS=0.00731185;technology.Illumina=1;BVAR;SU…	DOWNSTREAM(MODIFIER||2007||81|Jcr4S02757.10|protein_coding|CODING|Jcr4S02757.10||1);INTERGENIC(MODIFIER||||||||||1);UPSTREAM(MODIFIER||1370||2171|Jcr4S02757.20|protein_coding|CODING|Jcr4S02757.20||1)	A/A	A/A	A/A	A/A	A/A	A/A	A/A	A/A	A/A	A/A	A/A	A/A	A/A	A/A	A/A	A/A	A/A	A/A	A/A	A/A	A/A	A/A	A/A	A/A	A/A	A/A	A/A	A/A	A/A	A/A	A/A	A/A	A/A	A/A	A/A	A/A
Jcr4S11034	2357	Jcr4S11034_2357	-	-	-	-	-	-	-	G	GAA	AB=0.107186;ABP=12181.9;AC=75;AF=0.390625;AN=192;AO=1059;CIGAR=1M2I;DP=11158;DPRA=3.14411;EPP=4.50511;EPPR=11.15;GTI=0;HWE=235.213;LEN=2;MEANALT=2.48936;MQM=19.0595;MQMR=17.1258;NS=96;NUMALT=1;ODDS=0;PAIRED=0;PAIREDR=0;RO=9032;RPP=2140.53;RPPR=19607.1;RUN=1;SAP=3.25841;SRP=10.974;TYPE=ins;XAI=0;XAM=0.00777094;XAS=0.00777094;XRI=2.62703e-05;XRM=0.0117629;XRS=0.0117367;technology.Illumina=1;BVAR;SU…	INTRON(MODIFIER||||1677|Jcr4S11034.20|protein_coding|CODING|Jcr4S11034.20|2|1);UPSTREAM(MODIFIER||752||411|Jcr4S11034.10|protein_coding|CODING|Jcr4S11034.10||1)	G/G	G/G	G/G	G/G	G/G	G/G	G/GAA	G/G	G/G	G/G	G/G	G/G	G/G	G/G	G/G	G/G	G/G	G/G	G/G	G/G	G/G	G/G	G/G	G/G	G/G	G/G	G/G	G/G	G/G	G/G	G/G	G/G	G/G	G/G	G/G	G/G
Jcr4S16941	2396	Jcr4S16941_2396	-	-	-	-	-	-	-	T	C	AB=0.119032;ABP=18642.9;AC=95;AF=0.494792;AN=192;AO=1766;CIGAR=1X;DP=14910;DPRA=0;EPP=3837.83;EPPR=12238.6;GTI=0;HWE=1042.78;LEN=1;MEANALT=1.0625;MQM=0;MQMR=0;NS=96;NUMALT=1;ODDS=0;PAIRED=0;PAIREDR=0;RO=13138;RPP=3837.83;RPPR=12284.2;RUN=1;SAP=3837.83;SRP=28462.4;TYPE=snp;XAI=2.91882e-05;XAM=0.000626022;XAS=0.000596834;XRI=2.74806e-05;XRM=0.00364826;XRS=0.00362078;technology.Illumina=1;BVAR;SURRS…	INTERGENIC(MODIFIER||||||||||1);UPSTREAM(MODIFIER||1374||169|Jcr4S16941.10|protein_coding|CODING|Jcr4S16941.10||1)	T/T	T/T	T/T	T/T	T/T	T/T	T/T	T/T	T/T	T/T	T/T	T/T	T/T	T/T	T/T	T/T	T/T	T/T	T/T	T/T	T/T	T/T	T/T	T/T	T/T	T/T	T/T	T/T	T/T	T/T	T/T	T/T	T/T	T/T	T/T	T/T
Jcr4U29415	2401	Jcr4U29415_2401	GO:0003676	-	-	nucleic acid binding	-	-	-	G	A	AB=0.0845751;ABP=3725.01;AC=42;AF=0.21875;AN=192;AO=317;CIGAR=1X;DP=5525;DPRA=1.36098;EPP=657.062;EPPR=11309.9;GTI=0;HWE=-268.252;LEN=1;MEANALT=1.01111;MQM=0;MQMR=0.00326484;NS=96;NUMALT=1;ODDS=0;PAIRED=0;PAIREDR=0;RO=5207;RPP=657.062;RPPR=11309.9;RUN=1;SAP=691.367;SRP=11309.9;TYPE=snp;XAI=0;XAM=0.0103927;XAS=0.0103927;XRI=4.76321e-06;XRM=0.0097161;XRS=0.00971134;technology.Illumina=1;BVAR;SURRSE…	NON_SYNONYMOUS_CODING(MODERATE|MISSENSE|Gtt/Att|V7I|617|Jcr4U29415.10|protein_coding|CODING|Jcr4U29415.10|1|1)	G/G	G/G	G/G	G/G	G/G	G/G	G/G	G/G	G/G	G/G	G/G	G/G	G/G	G/G	G/G	G/G	G/G	G/G	G/G	G/G	G/G	G/G	G/G	G/G	G/G	G/G	G/G	G/G	G/G	G/G	G/G	G/G	G/G	G/G	G/G	G/G
Jcr4S08858	2609	Jcr4S08858_2609	-	-	-	-	-	-	-	G	A	AB=0.114117;ABP=12719.5;AC=79;AF=0.411458;AN=192;AO=1191;CIGAR=1X;DP=11288;DPRA=59.4;EPP=2589.23;EPPR=459.553;GTI=0;HWE=345.748;LEN=1;MEANALT=1;MQM=15.822;MQMR=14.5755;NS=96;NUMALT=1;ODDS=0;PAIRED=0;PAIREDR=0;RO=10097;RPP=2528.79;RPPR=21911;RUN=1;SAP=2528.79;SRP=462.063;TYPE=snp;XAI=0;XAM=0.0103022;XAS=0.0103022;XRI=3.06307e-06;XRM=0.0080056;XRS=0.00800254;technology.Illumina=1;BVAR;SURRSEQ=GGTTT…	DOWNSTREAM(MODIFIER||1089||74|Jcr4S08858.20|protein_coding|CODING|Jcr4S08858.20||1);INTERGENIC(MODIFIER||||||||||1);UPSTREAM(MODIFIER||175||205|Jcr4S08858.10|protein_coding|CODING|Jcr4S08858.10||1)	G/G	G/G	G/G	G/G	G/G	G/A	G/G	G/G	G/G	G/G	G/G	G/G	G/G	G/G	G/G	G/G	G/G	G/G	G/G	G/G	G/G	G/G	G/G	G/G	G/G	G/G	G/G	G/G	G/G	G/G	G/G	G/G	G/G	G/G	G/G	G/G
Jcr4S12928	2612	Jcr4S12928_2612	-	-	-	-	-	-	-	T	C	AB=0.0955402;ABP=7617.64;AC=70;AF=0.364583;AN=192;AO=590;CIGAR=1X;DP=7154;DPRA=75.2947;EPP=1284.18;EPPR=7250.87;GTI=0;HWE=116.246;LEN=1;MEANALT=1.02105;MQM=0;MQMR=0;NS=96;NUMALT=1;ODDS=0;PAIRED=0;PAIREDR=0;RO=6562;RPP=1284.18;RPPR=7250.87;RUN=1;SAP=1284.18;SRP=14252.2;TYPE=snp;XAI=0.00563058;XAM=0.0105442;XAS=0.00491362;XRI=7.85529e-06;XRM=0.00814213;XRS=0.00813427;technology.Illumina=1;BVAR;SURR…	UPSTREAM(MODIFIER||793||106|Jcr4S12928.10|protein_coding|CODING|Jcr4S12928.10||1)	T/T	T/T	T/T	T/T	T/T	T/T	T/T	T/T	T/T	T/T	T/T	T/T	T/T	T/T	T/T	T/T	T/T	T/T	T/T	T/T	T/T	T/T	T/T	T/T	T/T	T/T	T/C	T/T	T/T	T/T	T/T	T/T	T/T	T/T	T/T	T/T
Jcr4U30779	2648	Jcr4U30779_2648	-	-	-	-	-	-	-	C	A	AB=0.125994;ABP=18334.7;AC=95;AF=0.494792;AN=192;AO=1906;CIGAR=1X;DP=15219;DPRA=0;EPP=4141.84;EPPR=4875.24;GTI=0;HWE=1042.78;LEN=1;MEANALT=1.05208;MQM=0;MQMR=32.562;NS=96;NUMALT=1;ODDS=0;PAIRED=0;PAIREDR=0;RO=13306;RPP=1088.26;RPPR=28870.6;RUN=1;SAP=1088.26;SRP=4885.95;TYPE=snp;XAI=5.40886e-06;XAM=0.00483853;XAS=0.00483312;XRI=8.55491e-06;XRM=0.00352729;XRS=0.00351874;technology.Illumina=1;BVAR;S…	INTERGENIC(MODIFIER||||||||||1)	C/C	C/C	C/C	C/C	C/C	C/C	C/C	C/C	C/C	C/C	C/C	C/C	C/C	C/C	C/C	C/C	C/C	C/C	C/C	C/C	C/C	C/C	C/C	C/C	C/C	C/C	C/C	C/C	C/C	C/C	C/C	C/C	C/C	C/C	C/C	C/C
Jcr4U32722	3030	Jcr4U32722_3030	-	-	-	-	-	-	-	C	A	AB=0.106764;ABP=11640;AC=85;AF=0.447368;AN=190;AO=983;CIGAR=1X;DP=9831;DPRA=0;EPP=52.0529;EPPR=7954.03;GTI=0;HWE=572.252;LEN=1;MEANALT=1.06316;MQM=0;MQMR=0;NS=95;NUMALT=1;ODDS=0;PAIRED=0;PAIREDR=0;RO=8839;RPP=2137.57;RPPR=19040.6;RUN=1;SAP=52.0529;SRP=7875.96;TYPE=snp;XAI=0;XAM=0.00918899;XAS=0.00918899;XRI=0;XRM=0.0113741;XRS=0.0113741;technology.Illumina=1;BVAR;SURRSEQ=GTGTTCTTCATAGATTACCCGCGTG…	INTERGENIC(MODIFIER||||||||||1)	C/C	C/C	C/C	C/C	C/C	C/C	C/C	C/C	C/C	C/C	C/C	C/C	C/C	C/C	C/C	C/C	C/C	C/C	C/C	C/C	C/C	C/C	C/C	C/C	C/C	C/C	C/C	C/C	C/A	C/C	C/C	C/C	C/C	C/C	C/C	C/C
Jcr4S04073	3151	Jcr4S04073_3151	-	-	-	-	-	-	-	G	A	AB=0.103993;ABP=15865.1;AC=88;AF=0.458333;AN=192;AO=1265;CIGAR=1X;DP=12733;DPRA=0;EPP=2749.92;EPPR=762.193;GTI=0;HWE=663.709;LEN=1;MEANALT=1.04167;MQM=0.029249;MQMR=14.9954;NS=96;NUMALT=1;ODDS=0;PAIRED=0;PAIREDR=0;RO=11464;RPP=2741.24;RPPR=24258.2;RUN=1;SAP=2741.24;SRP=878.589;TYPE=snp;XAI=7.98499e-06;XAM=0.0100571;XAS=0.0100491;XRI=5.49578e-06;XRM=0.00466317;XRS=0.00465768;technology.Illumina=1;…	NON_SYNONYMOUS_CODING(MODERATE|MISSENSE|aCc/aTc|T712I|909|Jcr4S04073.10|protein_coding|CODING|Jcr4S04073.10|10|1)	G/G	G/G	G/G	G/G	G/G	G/G	G/G	G/G	G/G	G/G	G/G	G/G	G/G	G/G	G/G	G/G	G/G	G/A	G/G	G/G	G/G	G/G	G/G	G/G	G/G	G/G	G/G	G/G	G/G	G/G	G/G	G/G	G/G	G/G	G/G	G/G
Jcr4S04073	3186	Jcr4S04073_3186	-	-	-	-	-	-	-	G	A	AB=0.105652;ABP=15536.6;AC=87;AF=0.453125;AN=192;AO=1276;CIGAR=1X;DP=12665;DPRA=0;EPP=2773.81;EPPR=1004.71;GTI=0;HWE=622.118;LEN=1;MEANALT=1.01042;MQM=0;MQMR=14.7458;NS=96;NUMALT=1;ODDS=0;PAIRED=0;PAIREDR=0;RO=11388;RPP=2773.81;RPPR=24731.7;RUN=1;SAP=2773.81;SRP=1004.71;TYPE=snp;XAI=3.16646e-05;XAM=0.0100676;XAS=0.010036;XRI=2.8715e-06;XRM=0.00469277;XRS=0.00468989;technology.Illumina=1;BVAR;SURR…	SYNONYMOUS_CODING(LOW|SILENT|caC/caT|H700|909|Jcr4S04073.10|protein_coding|CODING|Jcr4S04073.10|10|1)	G/G	G/G	G/G	G/G	G/G	G/G	G/G	G/G	G/G	G/G	G/G	G/G	G/G	G/G	G/G	G/G	G/G	G/A	G/G	G/G	G/G	G/G	G/G	G/G	G/G	G/G	G/G	G/G	G/G	G/G	G/G	G/G	G/G	G/G	G/G	G/G
Jcr4U31276	3253	Jcr4U31276_3253	-	-	-	-	-	-	-	C	T	AB=0.0935131;ABP=5113.7;AC=64;AF=0.333333;AN=192;AO=393;CIGAR=1X;DP=5214;DPRA=1.42857;EPP=856.399;EPPR=10463;GTI=0;HWE=-3.0103;LEN=1;MEANALT=1;MQM=0;MQMR=0;NS=96;NUMALT=1;ODDS=0;PAIRED=0;PAIREDR=0;RO=4821;RPP=856.399;RPPR=10463;RUN=1;SAP=856.399;SRP=10471.7;TYPE=snp;XAI=0;XAM=0.000522876;XAS=0.000522876;XRI=1.10527e-05;XRM=0.00759606;XRS=0.00758501;technology.Illumina=1;BVAR;SURRSEQ=TGAGTAGCTACCC…	DOWNSTREAM(MODIFIER||373||142|Jcr4U31276.10|protein_coding|CODING|Jcr4U31276.10||1);INTERGENIC(MODIFIER||||||||||1)	C/C	C/C	C/C	C/C	C/C	C/C	C/C	C/C	C/C	C/C	C/C	C/C	C/C	C/C	C/C	C/C	C/C	C/C	C/C	C/C	C/C	C/C	C/C	C/C	C/C	C/C	C/C	C/C	C/C	C/C	C/C	C/C	C/C	C/C	C/C	C/C
Jcr4S02965	3490	Jcr4S02965_3490	GO:0015074;GO:0003676	DNA integration	-	nucleic acid binding	-	-	-	A	G	AB=0.102131;ABP=5617.04;AC=64;AF=0.333333;AN=192;AO=499;CIGAR=1X;DP=5971;DPRA=3.23622;EPP=1086.58;EPPR=11861.4;GTI=0;HWE=-3.0103;LEN=1;MEANALT=1.03191;MQM=0;MQMR=0;NS=96;NUMALT=1;ODDS=0;PAIRED=0;PAIREDR=0;RO=5469;RPP=1086.58;RPPR=11878.8;RUN=1;SAP=1086.58;SRP=11861.4;TYPE=snp;XAI=6.35865e-05;XAM=0.010338;XAS=0.0102744;XRI=1.33143e-05;XRM=0.0106296;XRS=0.0106162;technology.Illumina=1;BVAR;SURRSEQ=…	DOWNSTREAM(MODIFIER||3046||380|Jcr4S02965.20|protein_coding|CODING|Jcr4S02965.20||1);SYNONYMOUS_CODING(LOW|SILENT|tcT/tcC|S279|1054|Jcr4S02965.10|protein_coding|CODING|Jcr4S02965.10|3|1)	A/A	A/A	A/A	A/A	A/A	A/A	A/A	A/A	A/A	A/A	A/A	A/A	A/A	A/A	A/A	A/A	A/A	A/A	A/A	A/A	A/A	A/A	A/A	A/A	A/A	A/A	A/A	A/A	A/A	A/A	A/A	A/A	A/A	A/A	A/A	A/A
Jcr4S02965	3516	Jcr4S02965_3516	GO:0015074;GO:0003676	DNA integration	-	nucleic acid binding	-	-	-	C	T	AB=0.108108;ABP=6468.77;AC=77;AF=0.401042;AN=192;AO=579;CIGAR=1X;DP=5983;DPRA=0;EPP=1260.29;EPPR=11729;GTI=0;HWE=288.598;LEN=1;MEANALT=1;MQM=0;MQMR=0;NS=96;NUMALT=1;ODDS=0;PAIRED=0;PAIREDR=0;RO=5404;RPP=1260.29;RPPR=11737.6;RUN=1;SAP=1260.29;SRP=11729;TYPE=snp;XAI=0;XAM=0.0103477;XAS=0.0103477;XRI=1.9346e-05;XRM=0.0104979;XRS=0.0104785;technology.Illumina=1;BVAR;SURRSEQ=ACCAAAGACCCTTTGGTGAGTTTCCA…	DOWNSTREAM(MODIFIER||3020||380|Jcr4S02965.20|protein_coding|CODING|Jcr4S02965.20||1);NON_SYNONYMOUS_CODING(MODERATE|MISSENSE|Ggt/Agt|G271S|1054|Jcr4S02965.10|protein_coding|CODING|Jcr4S02965.10|3|1)	C/C	C/C	C/C	C/C	C/C	C/C	C/C	C/T	C/C	C/C	C/C	C/C	C/C	C/C	C/C	C/C	C/C	C/C	C/C	C/C	C/C	C/C	C/C	C/C	C/C	C/C	C/C	C/C	C/C	C/C	C/C	C/C	C/C	C/C	C/C	C/C
Jcr4S01877	3816	Jcr4S01877_3816	GO:0015074;GO:0008270;GO:0003676	DNA integration	-	zinc ion binding; nucleic acid binding	-	-	-	T	A	AB=0.129141;ABP=18467.2;AC=95;AF=0.494792;AN=192;AO=1996;CIGAR=1X;DP=15458;DPRA=81.3474;EPP=4337.27;EPPR=5251.91;GTI=0;HWE=1042.78;LEN=1;MEANALT=1.02105;MQM=0.0450902;MQMR=4.74294;NS=96;NUMALT=1;ODDS=0;PAIRED=0;PAIREDR=0;RO=13460;RPP=4285.31;RPPR=28738;RUN=1;SAP=4285.31;SRP=5044.2;TYPE=snp;XAI=0;XAM=0.0104609;XAS=0.0104609;XRI=1.02678e-05;XRM=0.0190821;XRS=0.0190718;technology.Illumina=1;BVAR;SUR…	DOWNSTREAM(MODIFIER||3277||207|Jcr4S01877.30|protein_coding|CODING|Jcr4S01877.30||1);NON_SYNONYMOUS_CODING(MODERATE|MISSENSE|gAc/gTc|D515V|1314|Jcr4S01877.20|protein_coding|CODING|Jcr4S01877.20|1|1);UPSTREAM(MODIFIER||3377||102|Jcr4S01877.10|protein_coding|CODING|Jcr4S01877.10||1)	T/T	T/T	T/T	T/T	T/T	T/T	T/T	T/T	T/T	T/T	T/T	T/T	T/T	T/T	T/T	T/T	T/T	T/T	T/T	T/T	T/T	T/T	T/T	T/T	T/T	T/T	T/T	T/T	T/T	T/T	T/T	T/T	T/T	T/T	T/T	T/T
Jcr4S11205	3841	Jcr4S11205_3841	-	-	-	-	-	-	-	C	T	AB=0.130275;ABP=25267;AC=95;AF=0.494792;AN=192;AO=2772;CIGAR=1X;DP=21279;DPRA=223.979;EPP=61.8218;EPPR=99.9809;GTI=0;HWE=1042.78;LEN=1;MEANALT=1.03158;MQM=0.0248918;MQMR=19.1488;NS=96;NUMALT=1;ODDS=0;PAIRED=0;PAIREDR=0;RO=18503;RPP=6022.33;RPPR=40181.8;RUN=1;SAP=61.8218;SRP=99.9809;TYPE=snp;XAI=0;XAM=0.0112795;XAS=0.0112795;XRI=1.02288e-05;XRM=0.0130163;XRS=0.0130061;technology.Illumina=1;BVAR;SU…	DOWNSTREAM(MODIFIER||1528||364|Jcr4S11205.30|protein_coding|CODING|Jcr4S11205.30||1);SYNONYMOUS_CODING(LOW|SILENT|gcC/gcT|A46|165|Jcr4S11205.20|protein_coding|CODING|Jcr4S11205.20|2|1);UPSTREAM(MODIFIER||1523||623|Jcr4S11205.10|protein_coding|CODING|Jcr4S11205.10||1);UPSTREAM(MODIFIER||3099||77|Jcr4S11205.40|protein_coding|CODING|Jcr4S11205.40||1)	C/C	C/C	C/C	C/C	C/C	C/T	C/C	C/C	C/C	C/C	C/C	C/C	C/C	C/C	C/C	C/C	C/C	C/C	C/C	C/C	C/C	C/C	C/C	C/C	C/C	C/C	C/C	C/C	C/C	C/C	C/C	C/C	C/C	C/C	C/C	C/C
Jcr4S02171	3891	Jcr4S02171_3891	GO:0015074;GO:0008270;GO:0003676	DNA integration	-	zinc ion binding; nucleic acid binding	-	-	-	G	A	AB=0.121149;ABP=13113;AC=93;AF=0.484375;AN=192;AO=1286;CIGAR=1X;DP=10755;DPRA=37.7263;EPP=2795.52;EPPR=3241.99;GTI=0;HWE=911.165;LEN=1;MEANALT=1.05263;MQM=0.0863142;MQMR=10.7733;NS=96;NUMALT=1;ODDS=0;PAIRED=0;PAIREDR=0;RO=9463;RPP=2769.53;RPPR=19717.8;RUN=1;SAP=2769.53;SRP=3585.13;TYPE=snp;XAI=1.60331e-05;XAM=0.000500472;XAS=0.000484439;XRI=8.71544e-06;XRM=0.0020061;XRS=0.00199738;technology.Illu…	DOWNSTREAM(MODIFIER||3141||885|Jcr4S02171.20|protein_coding|CODING|Jcr4S02171.20||1);SYNONYMOUS_CODING(LOW|SILENT|gaC/gaT|D375|1451|Jcr4S02171.10|protein_coding|CODING|Jcr4S02171.10|3|1|WARNING_TRANSCRIPT_INCOMPLETE)	G/G	G/G	G/G	G/G	G/G	G/G	G/G	G/G	G/G	G/G	G/G	G/G	G/G	G/G	G/G	G/G	G/G	G/G	G/G	G/G	G/G	G/G	G/G	G/G	G/G	G/G	G/G	G/G	G/G	G/G	G/G	G/G	G/G	G/G	G/G	G/G
Jcr4S26598	4062	Jcr4S26598_4062	-	-	-	-	-	-	-	G	A	AB=0.108196;ABP=4932.5;AC=66;AF=0.34375;AN=192;AO=462;CIGAR=1X;DP=5242;DPRA=1.69322;EPP=21.0777;EPPR=64.21;GTI=0;HWE=34.1436;LEN=1;MEANALT=1.01075;MQM=0;MQMR=0;NS=96;NUMALT=1;ODDS=0;PAIRED=0;PAIREDR=0;RO=4779;RPP=1006.23;RPPR=5464.67;RUN=1;SAP=21.0777;SRP=62.8832;TYPE=snp;XAI=2.23145e-05;XAM=0.000856392;XAS=0.000834078;XRI=6.47161e-06;XRM=0.00477263;XRS=0.00476616;technology.Illumina=1;BVAR;SURRS…	DOWNSTREAM(MODIFIER||2675||189|Jcr4S26598.10|protein_coding|CODING|Jcr4S26598.10||1);NON_SYNONYMOUS_CODING(MODERATE|MISSENSE|Gca/Aca|A2T|80|Jcr4S26598.20|protein_coding|CODING|Jcr4S26598.20|1|1)	G/G	G/G	G/G	G/G	G/G	G/G	G/G	G/G	G/G	G/G	G/G	G/G	G/G	G/G	G/G	G/G	G/G	G/G	G/G	G/G	G/G	G/G	G/G	G/G	G/G	G/G	G/G	G/G	G/G	G/G	G/G	G/G	G/G	G/G	G/G	G/G
Jcr4S03624	4139	Jcr4S03624_4139	-	-	-	-	-	-	-	TTC	T	AB=0.108729;ABP=4344.64;AC=51;AF=0.268421;AN=190;AO=459;CIGAR=1M2D;DP=5949;DPRA=1.51759;EPP=3.58274;EPPR=19.7948;GTI=0;HWE=-181.458;LEN=2;MEANALT=1.64706;MQM=37;MQMR=37;NS=95;NUMALT=1;ODDS=0;PAIRED=0;PAIREDR=0;RO=5384;RPP=999.716;RPPR=11694.2;RUN=1;SAP=3.58274;SRP=19.7948;TYPE=del;XAI=0.0104202;XAM=0.0112126;XAS=0.000792438;XRI=6.06068e-06;XRM=0.000631167;XRS=0.000625106;technology.Illumina=1;BVA…	DOWNSTREAM(MODIFIER||4385||79|Jcr4S03624.20|protein_coding|CODING|Jcr4S03624.20||1);INTRON(MODIFIER||||475|Jcr4S03624.10|protein_coding|CODING|Jcr4S03624.10|7|1)	TTC/TTC	TTC/TTC	TTC/TTC	TTC/TTC	TTC/TTC	TTC/TTC	TTC/TTC	TTC/TTC	TTC/TTC	TTC/TTC	TTC/TTC	TTC/TTC	TTC/TTC	TTC/TTC	TTC/TTC	TTC/TTC	TTC/TTC	TTC/TTC	TTC/T	TTC/TTC	TTC/TTC	TTC/TTC	TTC/TTC	TTC/TTC	TTC/TTC	TTC/TTC	TTC/TTC	TTC/TTC	TTC/TTC	TTC/TTC	TTC/TTC	TTC/TTC	TTC/TTC	TTC/TTC	TTC/TTC	TTC/TTC
Jcr4S21324	4169	Jcr4S21324_4169	GO:0015074;GO:0003676	DNA integration	-	nucleic acid binding	-	-	-	G	T	AB=0.108544;ABP=8010.35;AC=86;AF=0.452632;AN=190;AO=679;CIGAR=1X;DP=6626;DPRA=0;EPP=1442.9;EPPR=4.65216;GTI=0;HWE=611.761;LEN=1;MEANALT=1.08421;MQM=0;MQMR=19.9409;NS=95;NUMALT=1;ODDS=0;PAIRED=0;PAIREDR=0;RO=5937;RPP=1477.44;RPPR=12895;RUN=1;SAP=1442.9;SRP=4.65216;TYPE=snp;XAI=1.5183e-05;XAM=0.000541275;XAS=0.000526092;XRI=5.26798e-05;XRM=0.000783759;XRS=0.000731079;technology.Illumina=1;BVAR;SURR…	DOWNSTREAM(MODIFIER||3323||302|Jcr4S21324.30|protein_coding|CODING|Jcr4S21324.30||1);DOWNSTREAM(MODIFIER||3534||113|Jcr4S21324.10|protein_coding|CODING|Jcr4S21324.10||1);SYNONYMOUS_CODING(LOW|SILENT|ccC/ccA|P936|1285|Jcr4S21324.20|protein_coding|CODING|Jcr4S21324.20|2|1)	G/G	G/G	G/G	G/G	G/G	G/G	G/G	G/G	G/G	G/G	G/G	G/G	G/G	G/G	G/G	G/G	G/T	G/G	G/G	G/G	G/G	G/G	G/G	G/G	G/G	G/G	G/G	G/G	./.	G/G	G/G	G/G	G/G	G/G	G/G	G/G
Jcr4S05580	4244	Jcr4S05580_4244	-	-	-	-	-	-	-	C	T	AB=0.12967;ABP=58383.5;AC=95;AF=0.494792;AN=192;AO=6355;CIGAR=1X;DP=49011;DPRA=257.942;EPP=14.959;EPPR=21.5862;GTI=0;HWE=1042.78;LEN=1;MEANALT=1.06316;MQM=17.3904;MQMR=17.3702;NS=96;NUMALT=1;ODDS=0;PAIRED=0;PAIREDR=0;RO=42646;RPP=13646.8;RPPR=92607.6;RUN=1;SAP=10.8013;SRP=21.5862;TYPE=snp;XAI=6.48892e-06;XAM=0.000636557;XAS=0.000630069;XRI=4.59559e-06;XRM=0.00359241;XRS=0.00358781;technology.Illu…	INTERGENIC(MODIFIER||||||||||1);UPSTREAM(MODIFIER||1510||118|Jcr4S05580.10|protein_coding|CODING|Jcr4S05580.10||1);UPSTREAM(MODIFIER||2986||663|Jcr4S05580.20|protein_coding|CODING|Jcr4S05580.20||1)	C/C	C/C	C/C	C/C	C/C	C/C	C/C	C/C	C/C	C/C	C/C	C/C	C/C	C/C	C/C	C/C	C/C	C/C	C/C	C/C	C/C	C/C	C/C	C/C	C/C	C/C	C/C	C/C	C/C	C/C	C/C	C/C	C/C	C/C	C/C	C/C
Jcr4S05580	4448	Jcr4S05580_4448	-	-	-	-	-	-	-	G	C	AB=0.133398;ABP=18143.8;AC=94;AF=0.489583;AN=192;AO=2080;CIGAR=1X;DP=15665;DPRA=54.9544;EPP=4519.67;EPPR=29500.3;GTI=0;HWE=972.993;LEN=1;MEANALT=1.01053;MQM=0;MQMR=0;NS=96;NUMALT=1;ODDS=0;PAIRED=0;PAIREDR=0;RO=13584;RPP=4519.67;RPPR=29500.3;RUN=1;SAP=4519.67;SRP=29500.3;TYPE=snp;XAI=0;XAM=0.000559623;XAS=0.000559623;XRI=7.6135e-06;XRM=0.00474579;XRS=0.00473818;technology.Illumina=1;BVAR;SURRSEQ=C…	INTERGENIC(MODIFIER||||||||||1);UPSTREAM(MODIFIER||1714||118|Jcr4S05580.10|protein_coding|CODING|Jcr4S05580.10||1);UPSTREAM(MODIFIER||2782||663|Jcr4S05580.20|protein_coding|CODING|Jcr4S05580.20||1)	G/G	G/G	G/G	G/G	G/G	G/G	G/G	G/G	G/G	G/G	G/G	G/G	G/G	G/G	G/G	G/G	G/G	G/G	G/G	G/G	G/G	G/G	G/G	G/G	G/G	G/G	G/G	G/G	G/G	G/G	G/G	G/G	G/G	G/G	G/G	G/G
Jcr4S03400	4791	Jcr4S03400_4791	-	-	-	-	-	-	-	C	T	AB=0.117515;ABP=10718.9;AC=89;AF=0.463542;AN=192;AO=1014;CIGAR=1X;DP=8886;DPRA=0;EPP=2204.88;EPPR=189.921;GTI=0;HWE=707.426;LEN=1;MEANALT=1.03125;MQM=0.139053;MQMR=16.5694;NS=96;NUMALT=1;ODDS=0;PAIRED=0;PAIREDR=0;RO=7869;RPP=2161.67;RPPR=15937.8;RUN=1;SAP=2161.67;SRP=332.677;TYPE=snp;XAI=0;XAM=0.0103148;XAS=0.0103148;XRI=7.87432e-06;XRM=0.00285965;XRS=0.00285178;technology.Illumina=1;BVAR;SURRSEQ…	DOWNSTREAM(MODIFIER||1216||396|Jcr4S03400.10|protein_coding|CODING|Jcr4S03400.10||1);INTERGENIC(MODIFIER||||||||||1);UPSTREAM(MODIFIER||1452||1926|Jcr4S03400.20|protein_coding|CODING|Jcr4S03400.20||1)	C/C	C/C	C/C	C/C	C/C	C/C	C/C	C/C	C/C	C/C	C/C	C/C	C/C	C/C	C/C	C/C	C/C	C/C	C/C	C/C	C/C	C/C	C/C	C/C	C/C	C/C	C/C	C/C	C/C	C/C	C/C	C/C	C/C	C/C	C/C	C/C
Jcr4S11434	5016	Jcr4S11434_5016	-	-	-	-	-	-	-	C	T	AB=0.112532;ABP=8670.87;AC=85;AF=0.442708;AN=192;AO=779;CIGAR=1X;DP=7352;DPRA=8.5883;EPP=3.48139;EPPR=8.00987;GTI=0;HWE=544.451;LEN=1;MEANALT=1.01053;MQM=0;MQMR=0;NS=96;NUMALT=1;ODDS=0;PAIRED=0;PAIREDR=0;RO=6571;RPP=1694.59;RPPR=14245.7;RUN=1;SAP=3.48139;SRP=7.53401;TYPE=snp;XAI=0;XAM=0.0104171;XAS=0.0104171;XRI=2.19647e-05;XRM=0.00212846;XRS=0.0021065;technology.Illumina=1;BVAR;SURRSEQ=ACGGCCGTG…	INTERGENIC(MODIFIER||||||||||1);UPSTREAM(MODIFIER||1608||1101|Jcr4S11434.20|protein_coding|CODING|Jcr4S11434.20||1);UPSTREAM(MODIFIER||2012||1000|Jcr4S11434.10|protein_coding|CODING|Jcr4S11434.10||1)	C/C	C/C	C/C	C/C	C/C	C/C	C/C	C/C	C/C	C/C	C/C	C/C	C/C	C/C	C/C	C/C	C/C	C/C	C/C	C/C	C/C	C/C	C/C	C/C	C/C	C/T	C/C	C/C	./.	C/C	C/C	./.	C/C	C/C	C/C	C/C
Jcr4U31459	5061	Jcr4U31459_5061	-	-	-	-	-	-	-	C	T	AB=0.111937;ABP=8276.33;AC=77;AF=0.401042;AN=192;AO=778;CIGAR=1X;DP=7842;DPRA=41.2632;EPP=26.6341;EPPR=277.565;GTI=0;HWE=288.598;LEN=1;MEANALT=1.01053;MQM=0.0951157;MQMR=6.35438;NS=96;NUMALT=1;ODDS=0;PAIRED=0;PAIREDR=0;RO=7063;RPP=1692.42;RPPR=15340.1;RUN=1;SAP=26.6341;SRP=277.565;TYPE=snp;XAI=0;XAM=0.000845402;XAS=0.000845402;XRI=1.02186e-05;XRM=0.00764412;XRS=0.0076339;technology.Illumina=1;BVA…	INTRON(MODIFIER||||1028|Jcr4U31459.10|protein_coding|CODING|Jcr4U31459.10|5|1)	C/C	C/C	C/C	C/C	C/C	C/C	C/C	C/C	C/C	C/C	C/C	C/C	C/C	C/C	C/C	C/C	C/C	C/C	C/C	C/C	C/C	C/T	C/C	C/C	C/C	C/C	C/C	C/C	C/C	C/C	C/C	C/C	C/C	C/C	C/C	C/C
Jcr4S06971	5125	Jcr4S06971_5125	-	-	-	-	-	-	-	C	T	AB=0.103468;ABP=12014.8;AC=84;AF=0.4375;AN=192;AO=961;CIGAR=1X;DP=9869;DPRA=103.874;EPP=2089.8;EPPR=1292.54;GTI=0;HWE=508.043;LEN=1;MEANALT=1;MQM=0;MQMR=0;NS=96;NUMALT=1;ODDS=0;PAIRED=0;PAIREDR=0;RO=8908;RPP=719.232;RPPR=19294.4;RUN=1;SAP=719.232;SRP=1279.11;TYPE=snp;XAI=1.07277e-05;XAM=0.000472863;XAS=0.000462135;XRI=1.65247e-05;XRM=0.00699692;XRS=0.0069804;technology.Illumina=1;BVAR;SURRSEQ=GGA…	DOWNSTREAM(MODIFIER||252||121|Jcr4S06971.20|protein_coding|CODING|Jcr4S06971.20||1);DOWNSTREAM(MODIFIER||4540||86|Jcr4S06971.10|protein_coding|CODING|Jcr4S06971.10||1);INTERGENIC(MODIFIER||||||||||1)	C/C	C/C	C/C	C/C	C/C	C/C	C/C	C/C	C/C	C/C	C/C	C/C	C/C	C/C	C/C	C/C	C/C	C/C	C/C	C/C	C/C	C/C	C/C	C/C	C/C	C/C	C/C	C/C	C/C	C/C	C/C	C/C	C/C	C/C	C/C	C/C
Jcr4S09714	5173	Jcr4S09714_5173	-	-	-	-	-	-	-	CT	C	AB=0.094486;ABP=5157.82;AC=45;AF=0.234375;AN=192;AO=499;CIGAR=1M1D;DP=7651;DPRA=1.3079;EPP=4.26793;EPPR=3.15206;GTI=0;HWE=-246.216;LEN=1;MEANALT=2.65169;MQM=37;MQMR=37;NS=96;NUMALT=1;ODDS=0;PAIRED=0;PAIREDR=0;RO=6755;RPP=1086.58;RPPR=14610.6;RUN=1;SAP=4.26793;SRP=3.02605;TYPE=del;XAI=0.0104854;XAM=0.0110914;XAS=0.000605993;XRI=1.85157e-05;XRM=0.000790147;XRS=0.000771631;technology.Illumina=1;BVAR…	DOWNSTREAM(MODIFIER||1283||348|Jcr4S09714.20|protein_coding|CODING|Jcr4S09714.20||1);DOWNSTREAM(MODIFIER||2973||571|Jcr4S09714.10|protein_coding|CODING|Jcr4S09714.10||1)	CT/CT	CT/CT	./.	CT/CT	CT/CT	CT/CT	CT/CT	CT/CT	CT/C	CT/CT	CT/CT	CT/CT	CT/CT	CT/CT	CT/CT	CT/CT	CT/CT	CT/CT	CT/CT	CT/CT	CT/CT	CT/CT	CT/CT	CT/CT	CT/CT	CT/CT	CT/CT	CT/CT	CT/CT	CT/CT	CT/CT	CT/CT	CT/CT	CT/CT	CT/CT	CT/CT
Jcr4S06979	5666	Jcr4S06979_5666	-	-	-	-	-	-	-	G	A	AB=0.110733;ABP=5030.75;AC=70;AF=0.364583;AN=192;AO=476;CIGAR=1X;DP=5201;DPRA=2.44147;EPP=35.1992;EPPR=13.2132;GTI=0;HWE=116.246;LEN=1;MEANALT=1;MQM=3.73109;MQMR=24.0626;NS=96;NUMALT=1;ODDS=0;PAIRED=0;PAIREDR=0;RO=4725;RPP=1036.63;RPPR=351.66;RUN=1;SAP=35.1992;SRP=6.81601;TYPE=snp;XAI=5.87676e-05;XAM=0.00762478;XAS=0.00756602;XRI=0;XRM=0.0128091;XRS=0.0128091;technology.Illumina=1;BVAR;SURRSEQ=AG…	DOWNSTREAM(MODIFIER||70||1666|Jcr4S06979.20|protein_coding|CODING|Jcr4S06979.20||1);INTERGENIC(MODIFIER||||||||||1);UPSTREAM(MODIFIER||270||418|Jcr4S06979.10|protein_coding|CODING|Jcr4S06979.10||1)	G/G	G/G	G/G	G/G	G/G	G/G	G/G	G/G	G/G	G/G	G/G	G/G	G/G	G/G	G/G	G/G	G/G	G/G	G/G	G/G	G/G	G/G	G/G	G/G	G/G	G/G	G/G	G/G	G/G	G/G	G/G	G/G	G/G	G/G	G/G	G/G
Jcr4S00218	5693	Jcr4S00218_5693	-	-	-	-	-	-	-	C	T	AB=0.0967344;ABP=9173.13;AC=75;AF=0.390625;AN=192;AO=710;CIGAR=1X;DP=8319;DPRA=87.5579;EPP=5.76287;EPPR=3.16139;GTI=0;HWE=235.213;LEN=1;MEANALT=1.06316;MQM=0;MQMR=0;NS=96;NUMALT=1;ODDS=0;PAIRED=0;PAIREDR=0;RO=7603;RPP=1400.63;RPPR=16512.7;RUN=1;SAP=15.5376;SRP=3.16139;TYPE=snp;XAI=0;XAM=0.000814947;XAS=0.000814947;XRI=0.000531732;XRM=0.00615437;XRS=0.00562264;technology.Illumina=1;BVAR;SURRSEQ=GC…	DOWNSTREAM(MODIFIER||1430||369|Jcr4S00218.10|protein_coding|CODING|Jcr4S00218.10||1);DOWNSTREAM(MODIFIER||2041||1714|Jcr4S00218.30|protein_coding|CODING|Jcr4S00218.30||1);DOWNSTREAM(MODIFIER||533||81|Jcr4S00218.20|protein_coding|CODING|Jcr4S00218.20||1);INTERGENIC(MODIFIER||||||||||1)	C/C	C/C	C/C	C/C	C/C	C/C	C/C	C/C	C/C	C/C	C/C	C/C	C/C	C/C	C/C	C/C	C/C	C/C	C/C	C/C	C/C	C/C	C/C	C/C	C/C	C/C	C/C	C/C	C/T	C/C	C/C	C/C	C/C	C/C	C/C	C/C
Jcr4S13215	5745	Jcr4S13215_5745	-	-	-	-	-	-	-	A	G	AB=0.105588;ABP=4161.95;AC=41;AF=0.213542;AN=192;AO=516;CIGAR=1X;DP=7454;DPRA=39.2211;EPP=1123.49;EPPR=496.179;GTI=0;HWE=-274.657;LEN=1;MEANALT=1.03158;MQM=0;MQMR=0;NS=96;NUMALT=1;ODDS=0;PAIRED=0;PAIREDR=0;RO=6935;RPP=136.345;RPPR=14751.1;RUN=1;SAP=136.345;SRP=554.389;TYPE=snp;XAI=0;XAM=0.0010335;XAS=0.0010335;XRI=1.47154e-05;XRM=0.00358274;XRS=0.00356803;technology.Illumina=1;BVAR;SURRSEQ=GTTGGA…	DOWNSTREAM(MODIFIER||3581||271|Jcr4S13215.40|protein_coding|CODING|Jcr4S13215.40||1);DOWNSTREAM(MODIFIER||4730||116|Jcr4S13215.10|protein_coding|CODING|Jcr4S13215.10||1);NON_SYNONYMOUS_CODING(MODERATE|MISSENSE|Agc/Ggc|S22G|942|Jcr4S13215.30|protein_coding|CODING|Jcr4S13215.30|1|1);UPSTREAM(MODIFIER||2520||175|Jcr4S13215.20|protein_coding|CODING|Jcr4S13215.20||1)	A/A	A/A	A/A	A/A	A/A	A/A	A/A	A/A	A/A	A/A	A/A	A/A	A/A	A/A	A/A	A/A	A/A	A/A	A/A	A/A	A/A	A/A	A/A	A/A	A/A	A/A	A/A	A/A	A/A	A/A	A/A	A/A	A/A	A/A	A/A	A/A
Jcr4S13215	5802	Jcr4S13215_5802	-	-	-	-	-	-	-	C	T	AB=0.104406;ABP=5093.57;AC=77;AF=0.401042;AN=192;AO=428;CIGAR=1X;DP=4608;DPRA=48.4947;EPP=932.4;EPPR=9066.74;GTI=0;HWE=288.598;LEN=1;MEANALT=1.02105;MQM=0;MQMR=0;NS=96;NUMALT=1;ODDS=0;PAIRED=0;PAIREDR=0;RO=4178;RPP=932.4;RPPR=9075.42;RUN=1;SAP=932.4;SRP=9066.74;TYPE=snp;XAI=2.36005e-05;XAM=0.00099227;XAS=0.00096867;XRI=9.72051e-06;XRM=0.00294319;XRS=0.00293347;technology.Illumina=1;BVAR;SURRSEQ=C…	DOWNSTREAM(MODIFIER||3524||271|Jcr4S13215.40|protein_coding|CODING|Jcr4S13215.40||1);DOWNSTREAM(MODIFIER||4787||116|Jcr4S13215.10|protein_coding|CODING|Jcr4S13215.10||1);NON_SYNONYMOUS_CODING(MODERATE|MISSENSE|Ccc/Tcc|P41S|942|Jcr4S13215.30|protein_coding|CODING|Jcr4S13215.30|1|1);UPSTREAM(MODIFIER||2577||175|Jcr4S13215.20|protein_coding|CODING|Jcr4S13215.20||1)	C/C	C/C	C/C	C/C	C/C	C/C	C/C	C/C	C/C	C/C	C/C	C/C	C/C	C/C	C/C	C/C	C/C	C/C	C/C	C/C	C/C	C/C	C/C	C/C	C/C	C/C	C/C	C/C	C/C	C/C	C/C	C/C	C/C	C/C	C/C	C/C
Jcr4S13894	5881	Jcr4S13894_5881	-	-	-	-	-	-	-	G	A	AB=0.106005;ABP=13205.8;AC=89;AF=0.463542;AN=192;AO=1069;CIGAR=1X;DP=10355;DPRA=54.4895;EPP=2324.31;EPPR=62.4103;GTI=0;HWE=707.426;LEN=1;MEANALT=1;MQM=17.9719;MQMR=20.0022;NS=96;NUMALT=1;ODDS=0;PAIRED=0;PAIREDR=0;RO=9286;RPP=2324.31;RPPR=1805.05;RUN=1;SAP=2324.31;SRP=11494.1;TYPE=snp;XAI=0;XAM=0.000773804;XAS=0.000773804;XRI=0.00245629;XRM=0.017021;XRS=0.0145647;technology.Illumina=1;BVAR;SURRSEQ…	DOWNSTREAM(MODIFIER||1873||326|Jcr4S13894.20|protein_coding|CODING|Jcr4S13894.20||1);UPSTREAM(MODIFIER||3813||82|Jcr4S13894.10|protein_coding|CODING|Jcr4S13894.10||1)	G/G	G/G	G/G	G/G	G/G	G/G	G/G	G/G	G/G	G/G	G/G	G/G	G/G	G/G	G/G	G/G	G/G	G/G	G/G	G/G	G/G	G/G	G/G	G/G	G/G	G/G	G/G	G/G	G/G	G/G	G/G	G/G	G/G	G/G	G/G	G/G
Jcr4S00308	5923	Jcr4S00308_5923	GO:0015074;GO:0003676	DNA integration	-	nucleic acid binding	-	-	-	T	C	AB=0.0928758;ABP=7722.61;AC=71;AF=0.369792;AN=192;AO=578;CIGAR=1X;DP=7173;DPRA=1.29129;EPP=1258.12;EPPR=14323.9;GTI=0;HWE=138.507;LEN=1;MEANALT=1;MQM=0;MQMR=0;NS=96;NUMALT=1;ODDS=0;PAIRED=0;PAIREDR=0;RO=6595;RPP=1258.12;RPPR=14323.9;RUN=1;SAP=1258.12;SRP=14323.9;TYPE=snp;XAI=0;XAM=0.000748827;XAS=0.000748827;XRI=0.0008796;XRM=0.00903595;XRS=0.00815635;technology.Illumina=1;BVAR;SURRSEQ=GGGTGCAACT…	NON_SYNONYMOUS_CODING(MODERATE|MISSENSE|tAt/tGt|Y2852C|3822|Jcr4S00308.10|protein_coding|CODING|Jcr4S00308.10|4|1|WARNING_TRANSCRIPT_INCOMPLETE)	T/T	T/T	T/T	T/T	T/T	T/T	T/T	T/T	T/T	T/T	T/T	T/T	T/T	T/T	T/T	T/T	T/T	T/T	T/T	T/T	T/T	T/T	T/T	T/T	T/T	T/T	T/T	T/T	T/T	T/T	T/T	T/T	T/T	T/T	T/T	T/T
Jcr4S08297	5926	Jcr4S08297_5926	-	-	-	-	-	-	-	G	C	AB=0.107436;ABP=10281.8;AC=87;AF=0.453125;AN=192;AO=857;CIGAR=1X;DP=8287;DPRA=87.2211;EPP=1863.96;EPPR=53.6519;GTI=0;HWE=622.118;LEN=1;MEANALT=2.33684;MQM=0;MQMR=6.30785;NS=96;NUMALT=1;ODDS=0;PAIRED=0;PAIREDR=0;RO=7208;RPP=1795.12;RPPR=15646.3;RUN=1;SAP=1795.12;SRP=54.1471;TYPE=snp;XAI=0;XAM=0.00324332;XAS=0.00324332;XRI=4.30566e-06;XRM=0.00581796;XRS=0.00581366;technology.Illumina=1;BVAR;SURRSEQ…	DOWNSTREAM(MODIFIER||1689||1041|Jcr4S08297.10|protein_coding|CODING|Jcr4S08297.10||1)	G/G	G/G	G/G	G/G	G/G	G/G	G/G	G/G	G/G	G/G	G/G	G/G	G/G	G/G	G/G	G/G	G/G	G/G	G/G	G/G	G/G	G/G	G/G	G/G	G/G	G/G	G/G	G/G	G/G	G/G	G/G	G/G	G/G	G/G	G/G	G/G
Jcr4S13894	5929	Jcr4S13894_5929	-	-	-	-	-	-	-	G	A	AB=0.128028;ABP=22428.7;AC=93;AF=0.484375;AN=192;AO=2410;CIGAR=1X;DP=19092;DPRA=50.2316;EPP=16.8645;EPPR=50.5093;GTI=0;HWE=911.165;LEN=1;MEANALT=1.02105;MQM=17.7751;MQMR=19.1086;NS=96;NUMALT=1;ODDS=0;PAIRED=0;PAIREDR=0;RO=16678;RPP=4978.93;RPPR=36218.8;RUN=1;SAP=6.7009;SRP=50.5093;TYPE=snp;XAI=0;XAM=0.000692837;XAS=0.000692837;XRI=0.00141751;XRM=0.0145346;XRS=0.0131171;technology.Illumina=1;BVAR;…	DOWNSTREAM(MODIFIER||1921||326|Jcr4S13894.20|protein_coding|CODING|Jcr4S13894.20||1);UPSTREAM(MODIFIER||3861||82|Jcr4S13894.10|protein_coding|CODING|Jcr4S13894.10||1)	G/G	G/G	G/G	G/G	G/G	G/G	G/G	G/G	G/G	G/G	G/G	G/G	G/G	G/G	G/G	G/G	G/G	G/G	G/G	G/G	G/G	G/A	G/G	G/G	G/G	G/G	G/G	G/G	G/G	G/G	G/G	G/G	G/G	G/G	G/G	G/G
Jcr4S13894	5971	Jcr4S13894_5971	-	-	-	-	-	-	-	C	T	AB=0.120757;ABP=23114.2;AC=92;AF=0.479167;AN=192;AO=2260;CIGAR=1X;DP=19055;DPRA=50.1342;EPP=5.81208;EPPR=99.9915;GTI=0;HWE=854.765;LEN=1;MEANALT=1.02105;MQM=18.054;MQMR=19.185;NS=96;NUMALT=1;ODDS=0;PAIRED=0;PAIREDR=0;RO=16792;RPP=4910.54;RPPR=36440.3;RUN=1;SAP=5.81208;SRP=101.34;TYPE=snp;XAI=9.12326e-06;XAM=0.000698817;XAS=0.000689694;XRI=0.00140563;XRM=0.014516;XRS=0.0131104;technology.Illumina=…	DOWNSTREAM(MODIFIER||1963||326|Jcr4S13894.20|protein_coding|CODING|Jcr4S13894.20||1);UPSTREAM(MODIFIER||3903||82|Jcr4S13894.10|protein_coding|CODING|Jcr4S13894.10||1)	C/C	C/C	C/C	C/C	C/C	C/C	C/C	C/C	C/C	C/C	C/C	C/C	C/C	C/C	C/C	C/C	C/C	C/C	C/C	C/C	C/C	C/C	C/C	C/T	C/C	C/C	C/C	C/C	C/C	C/C	C/C	C/C	C/C	C/C	C/C	C/C
Jcr4S07990	6033	Jcr4S07990_6033	GO:0015074;GO:0003676	DNA integration	-	nucleic acid binding	-	-	-	G	A	AB=0.102479;ABP=6204.28;AC=70;AF=0.364583;AN=192;AO=530;CIGAR=1X;DP=6018;DPRA=12.6589;EPP=1153.89;EPPR=4471.67;GTI=0;HWE=116.246;LEN=1;MEANALT=1.02105;MQM=0;MQMR=0;NS=96;NUMALT=1;ODDS=0;PAIRED=0;PAIREDR=0;RO=5486;RPP=1153.89;RPPR=4471.67;RUN=1;SAP=1153.89;SRP=11915.7;TYPE=snp;XAI=3.89029e-05;XAM=0.0102313;XAS=0.0101924;XRI=1.89898e-05;XRM=0.0103821;XRS=0.0103631;technology.Illumina=1;BVAR;SURRSEQ…	DOWNSTREAM(MODIFIER||2661||509|Jcr4S07990.10|protein_coding|CODING|Jcr4S07990.10||1);NON_SYNONYMOUS_CODING(MODERATE|MISSENSE|Ggt/Agt|G287S|1062|Jcr4S07990.20|protein_coding|CODING|Jcr4S07990.20|1|1);UPSTREAM(MODIFIER||3669||944|Jcr4S07990.30|protein_coding|CODING|Jcr4S07990.30||1)	G/G	G/G	G/G	G/G	G/G	G/G	G/G	G/G	G/G	G/G	G/G	G/G	G/G	G/G	G/G	G/G	G/A	G/G	G/G	G/G	G/G	G/G	G/G	G/G	G/G	G/G	G/G	G/G	G/G	G/G	G/G	G/G	G/G	G/G	G/G	G/G
Jcr4S07990	6059	Jcr4S07990_6059	GO:0015074;GO:0003676	DNA integration	-	nucleic acid binding	-	-	-	T	C	AB=0.0947576;ABP=6506.01;AC=71;AF=0.369792;AN=192;AO=493;CIGAR=1X;DP=6006;DPRA=1.57;EPP=1073.55;EPPR=11879;GTI=0;HWE=138.507;LEN=1;MEANALT=1.04211;MQM=0;MQMR=0;NS=96;NUMALT=1;ODDS=0;PAIRED=0;PAIREDR=0;RO=5509;RPP=1073.55;RPPR=11879;RUN=1;SAP=1073.55;SRP=11965.7;TYPE=snp;XAI=0;XAM=0.0102004;XAS=0.0102004;XRI=2.07819e-05;XRM=0.0104554;XRS=0.0104346;technology.Illumina=1;BVAR;SURRSEQ=GTGGCGGTAATTGGA…	DOWNSTREAM(MODIFIER||2687||509|Jcr4S07990.10|protein_coding|CODING|Jcr4S07990.10||1);SYNONYMOUS_CODING(LOW|SILENT|tcT/tcC|S295|1062|Jcr4S07990.20|protein_coding|CODING|Jcr4S07990.20|1|1);UPSTREAM(MODIFIER||3643||944|Jcr4S07990.30|protein_coding|CODING|Jcr4S07990.30||1)	T/T	T/T	T/T	T/T	T/T	T/T	T/T	T/T	T/T	T/T	T/T	T/T	T/T	T/T	T/T	T/T	T/T	T/T	T/T	T/T	T/T	T/T	T/T	T/T	T/T	T/T	T/T	T/T	T/T	T/T	T/T	T/T	T/T	T/T	T/T	T/T
Jcr4S16926	6332	Jcr4S16926_6332	GO:0008270;GO:0003676	-	-	nucleic acid binding; zinc ion binding	-	-	-	G	A	AB=0.098545;ABP=2119.62;AC=29;AF=0.151042;AN=192;AO=295;CIGAR=1X;DP=5012;DPRA=1.68599;EPP=634.938;EPPR=1110.43;GTI=0;HWE=-314.567;LEN=1;MEANALT=1;MQM=0;MQMR=0;NS=96;NUMALT=1;ODDS=0;PAIRED=0;PAIREDR=0;RO=4717;RPP=643.595;RPPR=1133.4;RUN=1;SAP=634.938;SRP=10176.5;TYPE=snp;XAI=0;XAM=0.000415438;XAS=0.000415438;XRI=6.57944e-06;XRM=0.0100925;XRS=0.0100859;technology.Illumina=1;BVAR;SURRSEQ=TTGATTGTAGA…	DOWNSTREAM(MODIFIER||3918||190|Jcr4S16926.10|protein_coding|CODING|Jcr4S16926.10||1);SYNONYMOUS_CODING(LOW|SILENT|caG/caA|Q479|556|Jcr4S16926.20|protein_coding|CODING|Jcr4S16926.20|3|1|WARNING_TRANSCRIPT_INCOMPLETE)	G/G	G/G	G/G	G/G	G/G	G/G	G/G	G/G	G/G	G/G	G/G	G/G	G/G	G/G	G/G	G/G	G/G	G/G	G/G	G/G	G/G	G/G	G/G	G/G	G/A	G/G	G/G	G/G	G/G	G/G	G/G	G/G	G/G	G/G	G/G	G/G
Jcr4S06738	6342	Jcr4S06738_6342	-	-	-	-	-	-	-	C	T	AB=0.104961;ABP=9675.75;AC=87;AF=0.453125;AN=192;AO=773;CIGAR=1X;DP=7662;DPRA=20.1526;EPP=1681.56;EPPR=14711.5;GTI=0;HWE=622.118;LEN=1;MEANALT=1;MQM=0;MQMR=0;NS=96;NUMALT=1;ODDS=0;PAIRED=0;PAIREDR=0;RO=6889;RPP=1681.56;RPPR=14711.5;RUN=1;SAP=1681.56;SRP=14962.3;TYPE=snp;XAI=0;XAM=0.00520575;XAS=0.00520575;XRI=0.000894929;XRM=0.00906878;XRS=0.00817385;technology.Illumina=1;BVAR;SURRSEQ=ACCACCTGCGT…	DOWNSTREAM(MODIFIER||1302||166|Jcr4S06738.20|protein_coding|CODING|Jcr4S06738.20||1);DOWNSTREAM(MODIFIER||4247||204|Jcr4S06738.40|protein_coding|CODING|Jcr4S06738.40||1);INTERGENIC(MODIFIER||||||||||1);UPSTREAM(MODIFIER||1977||227|Jcr4S06738.30|protein_coding|CODING|Jcr4S06738.30||1)	C/C	C/C	C/C	C/C	C/C	C/C	C/C	C/C	C/C	C/C	C/C	C/C	C/C	C/C	C/C	C/C	C/C	C/C	C/C	C/C	C/C	C/C	C/C	C/C	C/C	C/C	C/C	C/C	C/C	C/C	C/C	C/C	C/C	C/C	C/C	C/C
Jcr4S06738	6410	Jcr4S06738_6410	-	-	-	-	-	-	-	A	G	AB=0.115235;ABP=10883;AC=91;AF=0.473958;AN=192;AO=999;CIGAR=1X;DP=8904;DPRA=0;EPP=2172.31;EPPR=7306.55;GTI=0;HWE=802.493;LEN=1;MEANALT=1.01042;MQM=0;MQMR=0;NS=96;NUMALT=1;ODDS=0;PAIRED=0;PAIREDR=0;RO=7904;RPP=2172.31;RPPR=17079.6;RUN=1;SAP=2172.31;SRP=7250;TYPE=snp;XAI=0;XAM=0.000644631;XAS=0.000644631;XRI=0.000754294;XRM=0.00891087;XRS=0.00815658;technology.Illumina=1;BVAR;SURRSEQ=TATCTTGAATAAAT…	DOWNSTREAM(MODIFIER||1370||166|Jcr4S06738.20|protein_coding|CODING|Jcr4S06738.20||1);DOWNSTREAM(MODIFIER||4179||204|Jcr4S06738.40|protein_coding|CODING|Jcr4S06738.40||1);INTERGENIC(MODIFIER||||||||||1);UPSTREAM(MODIFIER||1909||227|Jcr4S06738.30|protein_coding|CODING|Jcr4S06738.30||1)	A/A	A/A	A/A	A/A	A/A	A/A	A/A	A/A	A/A	A/A	A/A	A/A	A/A	A/A	A/A	A/A	A/A	A/A	A/A	A/A	A/A	A/A	A/A	A/A	A/A	A/A	A/A	A/A	A/A	A/A	A/A	A/A	A/A	A/A	A/A	A/A
Jcr4S16926	6425	Jcr4S16926_6425	GO:0008270;GO:0003676	-	-	nucleic acid binding; zinc ion binding	-	-	-	G	A	AB=0.107285;ABP=6383.43;AC=82;AF=0.427083;AN=192;AO=548;CIGAR=1X;DP=5533;DPRA=58.2316;EPP=1192.98;EPPR=10825.6;GTI=0;HWE=439.45;LEN=1;MEANALT=1.01053;MQM=0;MQMR=0;NS=96;NUMALT=1;ODDS=0;PAIRED=0;PAIREDR=0;RO=4984;RPP=1192.98;RPPR=10825.6;RUN=1;SAP=1192.98;SRP=10825.6;TYPE=snp;XAI=1.88126e-05;XAM=0.00539794;XAS=0.00537913;XRI=6.27052e-06;XRM=0.00957585;XRS=0.00956958;technology.Illumina=1;BVAR;SURR…	DOWNSTREAM(MODIFIER||4011||190|Jcr4S16926.10|protein_coding|CODING|Jcr4S16926.10||1);SYNONYMOUS_CODING(LOW|SILENT|caG/caA|Q510|556|Jcr4S16926.20|protein_coding|CODING|Jcr4S16926.20|3|1|WARNING_TRANSCRIPT_INCOMPLETE)	G/G	G/G	G/G	G/G	G/A	G/G	G/G	G/G	G/G	G/G	G/G	G/G	G/G	G/G	G/G	G/G	G/G	G/G	G/G	G/G	G/G	G/G	G/G	G/G	G/G	G/G	G/G	G/G	G/G	G/G	G/G	G/G	G/G	G/G	G/G	G/G
Jcr4S16755	6892	Jcr4S16755_6892	-	-	-	-	-	-	-	G	A	AB=0.109031;ABP=17660.1;AC=95;AF=0.494792;AN=192;AO=1455;CIGAR=1X;DP=13387;DPRA=0;EPP=2965.89;EPPR=25908.7;GTI=0;HWE=1042.78;LEN=1;MEANALT=1.02083;MQM=16.9065;MQMR=14.5262;NS=96;NUMALT=1;ODDS=0;PAIRED=0;PAIREDR=0;RO=11930;RPP=2965.89;RPPR=25908.7;RUN=1;SAP=3162.5;SRP=25908.7;TYPE=snp;XAI=1.41708e-05;XAM=0.0103318;XAS=0.0103176;XRI=3.45659e-06;XRM=0.00487415;XRS=0.00487069;technology.Illumina=1;BV…	DOWNSTREAM(MODIFIER||4816||617|Jcr4S16755.10|protein_coding|CODING|Jcr4S16755.10||1);UPSTREAM(MODIFIER||2742||276|Jcr4S16755.20|protein_coding|CODING|Jcr4S16755.20||1);UPSTREAM(MODIFIER||610||231|Jcr4S16755.30|protein_coding|CODING|Jcr4S16755.30||1)	G/G	G/G	G/G	G/G	G/G	G/G	G/G	G/G	G/G	G/G	G/G	G/G	G/G	G/G	G/G	G/G	G/G	G/G	G/G	G/G	G/G	G/G	G/G	G/A	G/G	G/G	G/G	G/G	G/G	G/G	G/G	G/G	G/G	G/G	G/G	G/G
Jcr4S03393	6894	Jcr4S03393_6894	-	-	-	-	-	-	-	G	A	AB=0.10197;ABP=14672.1;AC=90;AF=0.46875;AN=192;AO=1112;CIGAR=1X;DP=11195;DPRA=29.45;EPP=2400.35;EPPR=21225.6;GTI=0;HWE=753.559;LEN=1;MEANALT=1.04211;MQM=2.7482;MQMR=24.9107;NS=96;NUMALT=1;ODDS=0;PAIRED=0;PAIREDR=0;RO=10079;RPP=2400.35;RPPR=21225.6;RUN=1;SAP=2417.69;SRP=21889.3;TYPE=snp;XAI=0;XAM=0.00920712;XAS=0.00920712;XRI=5.2295e-06;XRM=0.00688846;XRS=0.00688323;technology.Illumina=1;BVAR;SURR…	DOWNSTREAM(MODIFIER||3993||247|Jcr4S03393.20|protein_coding|CODING|Jcr4S03393.20||1);INTERGENIC(MODIFIER||||||||||1);UPSTREAM(MODIFIER||780||183|Jcr4S03393.10|protein_coding|CODING|Jcr4S03393.10||1)	G/G	G/G	G/G	G/G	G/G	G/G	G/G	G/G	G/G	G/G	G/G	G/G	G/G	G/G	G/G	G/G	G/G	G/G	G/G	G/G	G/G	G/G	G/G	G/G	G/G	G/G	G/G	G/G	G/G	G/G	G/G	G/G	G/G	G/G	G/G	G/G
Jcr4S16755	6941	Jcr4S16755_6941	-	-	-	-	-	-	-	G	A	AB=0.100328;ABP=19861.7;AC=85;AF=0.442708;AN=192;AO=1532;CIGAR=1X;DP=16054;DPRA=33.7874;EPP=3329.71;EPPR=13411.1;GTI=0;HWE=544.451;LEN=1;MEANALT=1.01053;MQM=16.9347;MQMR=11.5069;NS=96;NUMALT=1;ODDS=0;PAIRED=0;PAIREDR=0;RO=14521;RPP=3329.71;RPPR=27252.7;RUN=1;SAP=3329.71;SRP=10673;TYPE=snp;XAI=0;XAM=0.000452523;XAS=0.000452523;XRI=4.25974e-06;XRM=0.006351;XRS=0.00634674;technology.Illumina=1;BVAR;…	DOWNSTREAM(MODIFIER||4865||617|Jcr4S16755.10|protein_coding|CODING|Jcr4S16755.10||1);UPSTREAM(MODIFIER||2791||276|Jcr4S16755.20|protein_coding|CODING|Jcr4S16755.20||1);UPSTREAM(MODIFIER||659||231|Jcr4S16755.30|protein_coding|CODING|Jcr4S16755.30||1)	G/G	G/G	G/G	G/G	G/G	G/G	G/G	G/G	G/G	G/G	G/G	G/G	G/G	G/G	G/G	G/G	G/G	G/G	G/G	G/G	G/G	G/G	G/G	G/G	G/G	G/G	G/G	G/G	G/G	G/G	G/G	G/G	G/G	G/G	G/G	G/G
Jcr4S06128	7286	Jcr4S06128_7286	GO:0015074;GO:0008270;GO:0003676	DNA integration	-	nucleic acid binding; zinc ion binding	-	-	-	G	A	AB=0.126668;ABP=33386.8;AC=95;AF=0.494792;AN=192;AO=3493;CIGAR=1X;DP=27577;DPRA=290.274;EPP=7527.28;EPPR=52285.6;GTI=0;HWE=1042.78;LEN=1;MEANALT=1.06316;MQM=19.2353;MQMR=36.9107;NS=96;NUMALT=1;ODDS=0;PAIRED=0;PAIREDR=0;RO=24077;RPP=7527.28;RPPR=52285.6;RUN=1;SAP=7587.96;SRP=52285.6;TYPE=snp;XAI=2.98215e-06;XAM=0.00099724;XAS=0.000994258;XRI=3.61878e-06;XRM=0.000823879;XRS=0.00082026;technology.Il…	SYNONYMOUS_CODING(LOW|SILENT|ggC/ggT|G437|629|Jcr4S06128.30|protein_coding|CODING|Jcr4S06128.30|1|1);UPSTREAM(MODIFIER||2902||142|Jcr4S06128.20|protein_coding|CODING|Jcr4S06128.20||1)	G/G	G/G	G/G	G/G	G/G	G/G	G/G	G/G	G/G	G/G	G/G	G/G	G/G	G/G	G/G	G/G	G/G	G/G	G/G	G/G	G/G	G/G	G/G	G/G	G/G	G/G	G/G	G/G	G/G	G/G	G/G	G/G	G/G	G/G	G/G	G/G
Jcr4S01559	7651	Jcr4S01559_7651	-	-	-	-	-	-	-	T	G	AB=0.10543;ABP=14099.1;AC=85;AF=0.442708;AN=192;AO=1167;CIGAR=1X;DP=11706;DPRA=0;EPP=2537.12;EPPR=22870.8;GTI=0;HWE=544.451;LEN=1;MEANALT=1.04167;MQM=36.2254;MQMR=14.3504;NS=96;NUMALT=1;ODDS=0;PAIRED=0;PAIREDR=0;RO=10535;RPP=2537.12;RPPR=22879.5;RUN=1;SAP=2537.12;SRP=22870.8;TYPE=snp;XAI=0;XAM=0.000603323;XAS=0.000603323;XRI=3.20166e-05;XRM=0.00992369;XRS=0.00989167;technology.Illumina=1;BVAR;SUR…	INTERGENIC(MODIFIER||||||||||1);UPSTREAM(MODIFIER||248||472|Jcr4S01559.20|protein_coding|CODING|Jcr4S01559.20||1);UPSTREAM(MODIFIER||640||148|Jcr4S01559.10|protein_coding|CODING|Jcr4S01559.10||1)	T/T	T/T	T/T	T/T	T/T	T/T	T/T	T/T	T/T	T/T	T/T	T/T	T/T	T/T	T/T	T/T	T/T	T/T	T/T	T/T	T/T	T/T	T/T	T/T	T/T	T/T	T/T	T/T	T/T	T/T	T/T	T/T	T/T	T/T	T/T	T/T
Jcr4S03480	8244	Jcr4S03480_8244	-	-	-	-	-	-	-	A	G	AB=0.10743;ABP=11840.2;AC=88;AF=0.458333;AN=192;AO=986;CIGAR=1X;DP=9590;DPRA=0;EPP=4.99237;EPPR=4.46838;GTI=0;HWE=663.709;LEN=1;MEANALT=1.02083;MQM=0;MQMR=0;NS=96;NUMALT=1;ODDS=0;PAIRED=0;PAIREDR=0;RO=8602;RPP=2066.62;RPPR=18682;RUN=1;SAP=8.08441;SRP=4.46838;TYPE=snp;XAI=0;XAM=0.00696506;XAS=0.00696506;XRI=1.23117e-05;XRM=0.0128405;XRS=0.0128281;technology.Illumina=1;BVAR;SURRSEQ=CCGTGCTACCTAGCAC…	DOWNSTREAM(MODIFIER||1285||555|Jcr4S03480.10|protein_coding|CODING|Jcr4S03480.10||1);INTERGENIC(MODIFIER||||||||||1);UPSTREAM(MODIFIER||1566||89|Jcr4S03480.20|protein_coding|CODING|Jcr4S03480.20||1)	A/A	A/A	A/A	A/A	A/A	A/A	A/A	A/A	A/A	A/A	A/A	A/A	A/A	A/A	A/A	A/A	A/A	A/A	A/A	A/A	A/A	A/A	A/G	A/A	A/A	A/A	A/A	A/A	A/A	A/A	A/A	A/A	A/A	A/A	A/A	A/A
Jcr4S05228	8336	Jcr4S05228_8336	-	-	-	-	-	-	-	G	A	AB=0.109633;ABP=9854.64;AC=81;AF=0.421875;AN=192;AO=888;CIGAR=1X;DP=8767;DPRA=30.7509;EPP=1931.28;EPPR=2481.78;GTI=0;HWE=407.07;LEN=1;MEANALT=1;MQM=0;MQMR=0;NS=96;NUMALT=1;ODDS=0;PAIRED=0;PAIREDR=0;RO=7879;RPP=5.21112;RPPR=13565.5;RUN=1;SAP=5.21112;SRP=4115.76;TYPE=snp;XAI=1.42548e-05;XAM=0.00107919;XAS=0.00106493;XRI=0.000611915;XRM=0.00943187;XRS=0.00881996;technology.Illumina=1;BVAR;SURRSEQ=GC…	DOWNSTREAM(MODIFIER||1553||119|Jcr4S05228.20|protein_coding|CODING|Jcr4S05228.20||1);DOWNSTREAM(MODIFIER||2300||540|Jcr4S05228.30|protein_coding|CODING|Jcr4S05228.30||1);INTERGENIC(MODIFIER||||||||||1)	G/G	G/G	G/G	G/G	G/G	G/G	G/G	G/G	G/G	G/G	G/G	G/G	G/G	G/G	G/G	G/G	G/G	G/G	G/G	G/G	G/G	G/G	G/G	G/G	G/G	G/G	G/G	G/G	G/G	G/G	G/G	G/G	G/G	G/G	G/G	G/G
Jcr4S11214	8406	Jcr4S11214_8406	-	-	-	-	-	-	-	G	T	AB=0.0949896;ABP=6827.69;AC=79;AF=0.411458;AN=192;AO=495;CIGAR=1X;DP=5732;DPRA=60.3263;EPP=1077.89;EPPR=4893.49;GTI=0;HWE=345.748;LEN=1;MEANALT=1.04211;MQM=0;MQMR=0;NS=96;NUMALT=1;ODDS=0;PAIRED=0;PAIREDR=0;RO=5233;RPP=1077.89;RPPR=4893.49;RUN=1;SAP=1077.89;SRP=11349;TYPE=snp;XAI=2.08268e-05;XAM=0.010362;XAS=0.0103412;XRI=0.000891629;XRM=0.0106115;XRS=0.00971986;technology.Illumina=1;BVAR;SURRSEQ=…	INTERGENIC(MODIFIER||||||||||1);UPSTREAM(MODIFIER||1789||506|Jcr4S11214.30|protein_coding|CODING|Jcr4S11214.30||1);UPSTREAM(MODIFIER||4773||307|Jcr4S11214.20|protein_coding|CODING|Jcr4S11214.20||1);UPSTREAM(MODIFIER||6||1551|Jcr4S11214.40|protein_coding|CODING|Jcr4S11214.40||1)	G/G	G/G	G/G	G/G	G/G	G/G	G/G	G/G	G/G	G/G	G/G	G/G	G/G	G/G	G/G	G/G	G/G	G/G	G/G	G/G	G/G	G/G	G/G	G/G	G/G	G/G	G/G	G/G	G/G	G/G	G/G	G/G	G/G	G/G	G/G	G/G
Jcr4S00875	8681	Jcr4S00875_8681	GO:0003676	-	-	nucleic acid binding	-	-	-	C	T	AB=0.109756;ABP=2931.64;AC=38;AF=0.2;AN=190;AO=340;CIGAR=1X;DP=5008;DPRA=1.3892;EPP=690.115;EPPR=10137.3;GTI=0;HWE=-286.118;LEN=1;MEANALT=1.01176;MQM=22.5294;MQMR=34.8483;NS=95;NUMALT=1;ODDS=0;PAIRED=0;PAIREDR=0;RO=4667;RPP=690.115;RPPR=10137.3;RUN=1;SAP=741.311;SRP=10137.3;TYPE=snp;XAI=3.03214e-05;XAM=0.0105319;XAS=0.0105015;XRI=3.31576e-05;XRM=0.00764056;XRS=0.0076074;technology.Illumina=1;BVAR…	DOWNSTREAM(MODIFIER||2616||1055|Jcr4S00875.10|protein_coding|CODING|Jcr4S00875.10||1);SYNONYMOUS_CODING(LOW|SILENT|ggG/ggA|G923|1053|Jcr4S00875.20|protein_coding|CODING|Jcr4S00875.20|3|1|WARNING_TRANSCRIPT_NO_START_CODON)	C/C	C/C	C/C	C/C	C/C	C/C	C/C	C/C	C/C	./.	C/C	C/C	C/C	C/C	C/C	C/C	C/C	C/C	C/C	C/C	C/C	C/C	C/C	C/C	C/C	C/C	./.	C/C	C/C	C/C	C/C	C/C	C/C	C/C	C/C	C/C
Jcr4S20353	9166	Jcr4S20353_9166	-	-	-	-	-	-	-	C	G	AB=0.105644;ABP=11012;AC=82;AF=0.427083;AN=192;AO=918;CIGAR=1X;DP=9324;DPRA=49.0632;EPP=1987.75;EPPR=6.37148;GTI=0;HWE=439.45;LEN=1;MEANALT=1.09474;MQM=0.08061;MQMR=36.9895;NS=96;NUMALT=1;ODDS=0;PAIRED=0;PAIREDR=0;RO=8396;RPP=1996.42;RPPR=18139.3;RUN=1;SAP=1987.75;SRP=5.19936;TYPE=snp;XAI=6.70354e-05;XAM=0.000644961;XAS=0.000577926;XRI=5.29097e-05;XRM=0.000849289;XRS=0.000796379;technology.Illumi…	UPSTREAM(MODIFIER||349||1737|Jcr4S20353.20|protein_coding|CODING|Jcr4S20353.20||1)	C/C	C/C	C/C	C/C	C/C	C/C	C/C	C/C	C/C	C/C	C/C	C/C	C/C	C/C	C/C	C/C	C/C	C/C	C/C	C/C	C/C	C/C	C/C	C/C	C/C	C/C	C/C	C/C	C/G	C/C	C/C	C/C	C/C	C/C	C/C	C/C
Jcr4S10832	9373	Jcr4S10832_9373	-	-	-	-	-	-	-	T	G	AB=0.104455;ABP=14951.6;AC=91;AF=0.478947;AN=190;AO=1171;CIGAR=1X;DP=11413;DPRA=0;EPP=2545.8;EPPR=20127.5;GTI=0;HWE=843.495;LEN=1;MEANALT=1.14737;MQM=0;MQMR=0.00146656;NS=95;NUMALT=1;ODDS=0;PAIRED=0;PAIREDR=0;RO=10228;RPP=2545.8;RPPR=20152.3;RUN=1;SAP=2545.8;SRP=22186.8;TYPE=snp;XAI=0;XAM=0.00509429;XAS=0.00509429;XRI=0.000328346;XRM=0.0074083;XRS=0.00707996;technology.Illumina=1;BVAR;SURRSEQ=ACT…	UPSTREAM(MODIFIER||4392||119|Jcr4S10832.10|protein_coding|CODING|Jcr4S10832.10||1)	T/T	T/T	T/T	T/T	T/T	T/T	T/T	T/T	T/T	T/T	T/T	T/T	T/T	T/T	T/T	T/T	T/T	T/T	T/T	T/T	T/T	T/T	T/T	T/T	T/T	T/T	T/T	T/T	T/T	T/T	T/T	T/T	T/T	T/T	T/T	T/T
Jcr4S07971	9981	Jcr4S07971_9981	-	-	-	-	-	-	-	C	T	AB=0.114746;ABP=10170.7;AC=87;AF=0.453125;AN=192;AO=944;CIGAR=1X;DP=8600;DPRA=15.0772;EPP=2052.88;EPPR=9248.48;GTI=0;HWE=622.118;LEN=1;MEANALT=1.01053;MQM=0;MQMR=0;NS=96;NUMALT=1;ODDS=0;PAIRED=0;PAIREDR=0;RO=7655;RPP=6.33192;RPPR=9177.37;RUN=1;SAP=6.33192;SRP=3972.96;TYPE=snp;XAI=0;XAM=0.00108853;XAS=0.00108853;XRI=0.000661965;XRM=0.00976145;XRS=0.00909948;technology.Illumina=1;BVAR;SURRSEQ=GAAAA…	INTRON(MODIFIER||||1204|Jcr4S07971.20|protein_coding|CODING|Jcr4S07971.20|1|1)	C/C	C/C	C/C	C/C	C/C	C/C	C/C	C/C	C/C	C/C	C/C	C/C	C/C	C/C	C/C	C/C	C/C	C/C	C/C	C/C	C/C	C/C	C/C	C/C	C/C	C/C	C/C	C/C	C/C	C/C	C/C	C/C	C/C	C/T	C/C	C/C
Jcr4S09874	10794	Jcr4S09874_10794	-	-	-	-	-	-	-	A	G	AB=0.116842;ABP=18545.3;AC=95;AF=0.494792;AN=192;AO=1708;CIGAR=1X;DP=14716;DPRA=0;EPP=3685.87;EPPR=51.3357;GTI=0;HWE=1042.78;LEN=1;MEANALT=1.02083;MQM=0.67623;MQMR=16.9902;NS=96;NUMALT=1;ODDS=0;PAIRED=0;PAIREDR=0;RO=13006;RPP=3711.89;RPPR=13695.5;RUN=1;SAP=3685.87;SRP=3336.02;TYPE=snp;XAI=1.18279e-05;XAM=0.00986063;XAS=0.00984881;XRI=2.05183e-05;XRM=0.0074768;XRS=0.00745628;technology.Illumina=1;…	INTRON(MODIFIER||||180|Jcr4S09874.40|protein_coding|CODING|Jcr4S09874.40|1|1);UPSTREAM(MODIFIER||2051||534|Jcr4S09874.30|protein_coding|CODING|Jcr4S09874.30||1);UPSTREAM(MODIFIER||4407||425|Jcr4S09874.20|protein_coding|CODING|Jcr4S09874.20||1)	A/A	A/A	A/A	A/A	A/A	A/A	A/A	A/A	A/A	A/A	A/A	A/A	A/A	A/A	A/A	A/A	A/A	A/A	A/A	A/A	A/A	A/A	A/A	A/A	A/A	A/A	A/A	A/A	A/A	A/A	A/A	A/A	A/A	A/A	A/A	A/A
Jcr4S05622	11137	Jcr4S05622_11137	GO:0015074;GO:0004523;GO:0003676	DNA integration	-	nucleic acid binding; ribonuclease H activity	EC:3.1.26.4	-	-	G	A	AB=0.120684;ABP=28853;AC=95;AF=0.494792;AN=192;AO=2796;CIGAR=1X;DP=23289;DPRA=0;EPP=22.3982;EPPR=62.4839;GTI=0;HWE=1042.78;LEN=1;MEANALT=1.05208;MQM=9.4628;MQMR=9.44281;NS=96;NUMALT=1;ODDS=0;PAIRED=0;PAIREDR=0;RO=20483;RPP=5774.25;RPPR=44463.9;RUN=1;SAP=9.02456;SRP=63.1209;TYPE=snp;XAI=2.9921e-05;XAM=0.000692451;XAS=0.00066253;XRI=2.57251e-05;XRM=0.00497355;XRS=0.00494783;technology.Illumina=1;BV…	DOWNSTREAM(MODIFIER||1477||415|Jcr4S05622.30|protein_coding|CODING|Jcr4S05622.30||1);DOWNSTREAM(MODIFIER||3241||669|Jcr4S05622.20|protein_coding|CODING|Jcr4S05622.20||1);SYNONYMOUS_CODING(LOW|SILENT|Ctg/Ttg|L936|1229|Jcr4S05622.40|protein_coding|CODING|Jcr4S05622.40|3|1)	G/G	G/G	G/G	G/G	G/G	G/G	G/G	G/G	G/G	G/G	G/G	G/G	G/G	G/G	G/G	G/G	G/G	G/G	G/G	G/G	G/G	G/G	G/G	G/G	G/G	G/G	G/G	G/G	G/G	G/G	G/G	G/G	G/G	G/G	G/G	G/G
Jcr4S15883	11194	Jcr4S15883_11194	GO:0015074;GO:0004523;GO:0003676	DNA integration	-	nucleic acid binding; ribonuclease H activity	EC:3.1.26.4	-	-	C	T	AB=0.0917889;ABP=4638.98;AC=52;AF=0.270833;AN=192;AO=404;CIGAR=1X;DP=6110;DPRA=1.0443;EPP=880.285;EPPR=12360.9;GTI=0;HWE=-178.103;LEN=1;MEANALT=1.07447;MQM=0;MQMR=0;NS=96;NUMALT=1;ODDS=0;PAIRED=0;PAIREDR=0;RO=5699;RPP=880.285;RPPR=12378.2;RUN=1;SAP=880.285;SRP=12360.9;TYPE=snp;XAI=0;XAM=0.000657133;XAS=0.000657133;XRI=0.000786283;XRM=0.0050668;XRS=0.00428051;technology.Illumina=1;BVAR;SURRSEQ=ACT…	STOP_GAINED(HIGH|NONSENSE|Cag/Tag|Q36*|1287|Jcr4S15883.30|protein_coding|CODING|Jcr4S15883.30|1|1);UPSTREAM(MODIFIER||4875||55|Jcr4S15883.20|protein_coding|CODING|Jcr4S15883.20||1)	C/C	C/C	C/C	C/C	C/C	C/C	C/C	C/C	C/T	C/C	C/C	C/C	C/C	C/C	C/C	C/C	C/C	C/C	C/C	C/C	C/C	C/C	C/C	C/C	C/C	C/C	C/C	C/C	C/C	C/C	C/C	C/C	C/C	C/C	C/C	C/C
Jcr4S00036	11390	Jcr4S00036_11390	-	-	-	-	-	-	-	G	A	AB=0.118175;ABP=12411.6;AC=90;AF=0.46875;AN=192;AO=1177;CIGAR=1X;DP=10221;DPRA=107.579;EPP=2558.83;EPPR=19637.5;GTI=0;HWE=753.559;LEN=1;MEANALT=1.02105;MQM=20.1308;MQMR=22.7319;NS=96;NUMALT=1;ODDS=0;PAIRED=0;PAIREDR=0;RO=9042;RPP=2558.83;RPPR=19637.5;RUN=1;SAP=2558.83;SRP=19637.5;TYPE=snp;XAI=0;XAM=0.0100574;XAS=0.0100574;XRI=1.1504e-05;XRM=0.0133154;XRS=0.0133039;technology.Illumina=1;BVAR;SURRS…	DOWNSTREAM(MODIFIER||397||1324|Jcr4S00036.20|protein_coding|CODING|Jcr4S00036.20||1);INTERGENIC(MODIFIER||||||||||1);UPSTREAM(MODIFIER||3974||1354|Jcr4S00036.30|protein_coding|CODING|Jcr4S00036.30||1)	G/G	G/G	G/G	G/G	G/G	G/G	G/G	G/G	G/G	G/G	G/G	G/G	G/G	G/G	G/G	G/G	G/G	G/G	G/G	G/G	G/G	G/G	G/G	G/G	G/G	G/G	G/G	G/G	G/G	G/G	G/G	G/G	G/G	G/G	G/G	G/G
Jcr4S04693	12381	Jcr4S04693_12381	-	-	-	-	-	-	-	G	A	AB=0.128527;ABP=54156.1;AC=95;AF=0.494792;AN=192;AO=5807;CIGAR=1X;DP=45184;DPRA=158.53;EPP=5.84066;EPPR=1701.85;GTI=0;HWE=1042.78;LEN=1;MEANALT=1.03158;MQM=36.6354;MQMR=30.3106;NS=96;NUMALT=1;ODDS=0;PAIRED=0;PAIREDR=0;RO=39372;RPP=11767.5;RPPR=71139.8;RUN=1;SAP=7.61762;SRP=253.703;TYPE=snp;XAI=5.29009e-06;XAM=0.000742367;XAS=0.000737076;XRI=4.13474e-06;XRM=0.00768771;XRS=0.00768358;technology.Ill…	NON_SYNONYMOUS_CODING(MODERATE|MISSENSE|Gag/Aag|E525K|855|Jcr4S04693.30|protein_coding|CODING|Jcr4S04693.30|7|1);UPSTREAM(MODIFIER||4161||141|Jcr4S04693.40|protein_coding|CODING|Jcr4S04693.40||1)	G/G	G/G	G/G	G/G	G/G	G/G	G/G	G/G	G/G	G/G	G/G	G/G	G/G	G/G	G/G	G/G	G/G	G/G	G/G	G/G	G/G	G/G	G/G	G/G	G/G	G/G	G/G	G/G	G/G	G/G	G/G	G/G	G/G	G/G	G/G	G/G
Jcr4S02757	12963	Jcr4S02757_12963	GO:0005515	-	-	protein binding	-	-	-	C	T	AB=0.106567;ABP=6677.02;AC=71;AF=0.369792;AN=192;AO=594;CIGAR=1X;DP=6609;DPRA=2.14206;EPP=24.1255;EPPR=8.2976;GTI=0;HWE=138.507;LEN=1;MEANALT=1.02128;MQM=0;MQMR=0;NS=96;NUMALT=1;ODDS=0;PAIRED=0;PAIREDR=0;RO=6013;RPP=1224.31;RPPR=6984.95;RUN=1;SAP=16.1707;SRP=5.04165;TYPE=snp;XAI=1.73557e-05;XAM=0.00607508;XAS=0.00605773;XRI=1.37517e-05;XRM=0.00880237;XRS=0.00878861;technology.Illumina=1;BVAR;SURR…	DOWNSTREAM(MODIFIER||1989||2171|Jcr4S02757.20|protein_coding|CODING|Jcr4S02757.20||1);NON_SYNONYMOUS_CODING(MODERATE|MISSENSE|aGt/aAt|S394N|455|Jcr4S02757.30|protein_coding|CODING|Jcr4S02757.30|4|1)	C/C	C/C	C/C	C/C	C/C	C/C	C/C	C/C	C/C	C/C	C/C	C/C	C/T	C/C	C/C	C/C	C/C	C/C	C/C	C/C	C/C	C/C	C/C	C/C	C/C	C/C	C/C	C/C	C/C	C/C	C/C	C/C	C/C	C/C	C/C	C/C
Jcr4S02757	12997	Jcr4S02757_12997	-	-	-	-	-	-	-	C	A	AB=0.106061;ABP=6853.28;AC=72;AF=0.375;AN=192;AO=606;CIGAR=1X;DP=6613;DPRA=69.6;EPP=15.9101;EPPR=25.4231;GTI=0;HWE=161.506;LEN=1;MEANALT=1;MQM=0;MQMR=0;NS=96;NUMALT=1;ODDS=0;PAIRED=0;PAIREDR=0;RO=6007;RPP=1216.76;RPPR=13047;RUN=1;SAP=28.294;SRP=25.4231;TYPE=snp;XAI=0;XAM=0.01042;XAS=0.01042;XRI=1.37654e-05;XRM=0.00833985;XRS=0.00832609;technology.Illumina=1;BVAR;SURRSEQ=GCCCGTGCTACCTAGCACACCCCGTG…	DOWNSTREAM(MODIFIER||2023||2171|Jcr4S02757.20|protein_coding|CODING|Jcr4S02757.20||1);INTRON(MODIFIER||||455|Jcr4S02757.30|protein_coding|CODING|Jcr4S02757.30|3|1)	C/C	C/C	C/C	C/C	C/C	C/C	C/C	C/C	C/C	C/C	C/C	C/C	C/C	C/C	C/C	C/C	C/C	C/C	C/C	C/C	C/C	C/C	C/C	C/C	C/C	C/C	C/C	C/C	C/C	C/C	C/C	C/C	C/C	C/C	C/C	C/C
Jcr4S16852	13033	Jcr4S16852_13033	-	-	-	-	-	-	-	C	T	AB=0.100811;ABP=1197.5;AC=22;AF=0.114583;AN=192;AO=171;CIGAR=1X;DP=3946;DPRA=1.1391;EPP=374.332;EPPR=164.634;GTI=0;HWE=-304.597;LEN=1;MEANALT=1.01266;MQM=0.0935673;MQMR=3.88977;NS=96;NUMALT=1;ODDS=0;PAIRED=0;PAIREDR=0;RO=3774;RPP=365.697;RPPR=3361.52;RUN=1;SAP=365.697;SRP=2053.97;TYPE=snp;XAI=0;XAM=0.00417592;XAS=0.00417592;XRI=1.35479e-05;XRM=0.00560645;XRS=0.00559291;technology.Illumina=1;BVAR;…	DOWNSTREAM(MODIFIER||1914||448|Jcr4S16852.50|protein_coding|CODING|Jcr4S16852.50||1);DOWNSTREAM(MODIFIER||319||88|Jcr4S16852.60|protein_coding|CODING|Jcr4S16852.60||1);UPSTREAM(MODIFIER||4079||122|Jcr4S16852.40|protein_coding|CODING|Jcr4S16852.40||1)	C/C	C/C	C/C	C/C	C/C	C/C	C/C	C/C	C/C	C/C	C/C	C/C	C/C	C/C	C/C	C/C	C/C	C/C	C/C	C/C	C/C	C/C	C/C	C/C	C/C	C/C	C/C	C/C	C/C	C/C	C/C	C/C	C/C	C/C	C/C	C/C
Jcr4S03443	16956	Jcr4S03443_16956	-	-	-	-	-	-	-	C	G	AB=0.112381;ABP=4799.04;AC=77;AF=0.401042;AN=192;AO=448;CIGAR=1X;DP=4485;DPRA=0;EPP=975.83;EPPR=8527.61;GTI=0;HWE=288.598;LEN=1;MEANALT=1.04167;MQM=0;MQMR=0;NS=96;NUMALT=1;ODDS=0;PAIRED=0;PAIREDR=0;RO=4033;RPP=975.83;RPPR=8544.76;RUN=1;SAP=975.83;SRP=8743.2;TYPE=snp;XAI=0;XAM=0.0101925;XAS=0.0101925;XRI=5.16628e-06;XRM=0.00915484;XRS=0.00914968;technology.Illumina=1;BVAR;SURRSEQ=CGTCACGCGGGTGTTCT…	UPSTREAM(MODIFIER||1666||2021|Jcr4S03443.30|protein_coding|CODING|Jcr4S03443.30||1)	C/C	C/C	C/C	C/C	C/C	C/C	C/C	C/C	C/C	C/C	C/C	C/C	C/C	C/C	C/C	C/C	C/C	C/C	C/G	C/C	C/C	C/C	C/C	C/C	C/C	C/C	C/C	C/C	C/C	C/C	C/C	C/C	C/C	C/C	C/C	C/C
Jcr4S03443	16976	Jcr4S03443_16976	-	-	-	-	-	-	-	C	T	AB=0.0924479;ABP=3327.03;AC=50;AF=0.260417;AN=192;AO=296;CIGAR=1X;DP=4482;DPRA=1.37893;EPP=537.809;EPPR=9053.74;GTI=0;HWE=-199.989;LEN=1;MEANALT=1.02174;MQM=0;MQMR=0;NS=96;NUMALT=1;ODDS=0;PAIRED=0;PAIREDR=0;RO=4184;RPP=537.809;RPPR=9079.77;RUN=1;SAP=645.766;SRP=9045.07;TYPE=snp;XAI=0;XAM=0.00994656;XAS=0.00994656;XRI=4.97983e-06;XRM=0.00958389;XRS=0.00957891;technology.Illumina=1;BVAR;SURRSEQ=AAG…	UPSTREAM(MODIFIER||1686||2021|Jcr4S03443.30|protein_coding|CODING|Jcr4S03443.30||1)	C/C	C/C	C/C	C/C	C/C	C/C	C/C	C/C	C/C	C/C	C/C	C/C	C/C	C/C	C/C	C/C	C/C	C/C	C/C	C/C	C/C	C/C	C/C	C/C	C/C	C/C	C/C	C/C	C/C	C/C	C/C	C/C	C/C	C/C	C/C	C/C
Jcr4S03443	17013	Jcr4S03443_17013	-	-	-	-	-	-	-	G	A	AB=0.0934176;ABP=4998.36;AC=55;AF=0.286458;AN=192;AO=444;CIGAR=1X;DP=6134;DPRA=0;EPP=967.144;EPPR=3562.21;GTI=0;HWE=-141.527;LEN=1;MEANALT=1.95833;MQM=0;MQMR=0;NS=96;NUMALT=1;ODDS=0;PAIRED=0;PAIREDR=0;RO=5313;RPP=967.144;RPPR=7168.08;RUN=1;SAP=967.144;SRP=1364.27;TYPE=snp;XAI=0;XAM=0.0103021;XAS=0.0103021;XRI=5.86201e-06;XRM=0.0075518;XRS=0.00754594;technology.Illumina=1;BVAR;SURRSEQ=GGAACTGTTTGT…	UPSTREAM(MODIFIER||1723||2021|Jcr4S03443.30|protein_coding|CODING|Jcr4S03443.30||1)	G/G	G/G	G/G	G/G	G/G	G/G	G/G	G/G	G/G	G/G	G/G	G/G	G/G	G/G	G/G	G/G	G/G	G/G	G/A	G/G	G/G	G/G	G/G	G/G	G/G	G/G	G/G	G/G	G/G	G/G	G/G	G/G	G/G	G/G	G/G	G/G
Jcr4S02290	18237	Jcr4S02290_18237	GO:0015074;GO:0008270;GO:0003676	DNA integration	-	zinc ion binding; nucleic acid binding	-	-	-	C	T	AB=0.108858;ABP=6228.77;AC=72;AF=0.375;AN=192;AO=589;CIGAR=1X;DP=6313;DPRA=0;EPP=1282.01;EPPR=12169;GTI=0;HWE=161.506;LEN=1;MEANALT=1.02083;MQM=0;MQMR=0;NS=96;NUMALT=1;ODDS=0;PAIRED=0;PAIREDR=0;RO=5722;RPP=1282.01;RPPR=12169;RUN=1;SAP=1282.01;SRP=12428.2;TYPE=snp;XAI=1.7503e-05;XAM=0.010131;XAS=0.0101135;XRI=1.82132e-05;XRM=0.00768041;XRS=0.0076622;technology.Illumina=1;BVAR;SURRSEQ=GGTCCATCGGTAC…	DOWNSTREAM(MODIFIER||2845||1270|Jcr4S02290.40|protein_coding|CODING|Jcr4S02290.40||1);DOWNSTREAM(MODIFIER||4798||49|Jcr4S02290.60|protein_coding|CODING|Jcr4S02290.60||1);NON_SYNONYMOUS_CODING(MODERATE|MISSENSE|cCa/cTa|P631L|1299|Jcr4S02290.50|protein_coding|CODING|Jcr4S02290.50|1|1)	C/C	C/C	C/C	C/C	C/C	C/C	C/C	C/C	C/C	C/C	C/C	C/C	C/C	C/C	C/C	C/C	C/C	C/C	C/C	C/C	C/C	C/C	C/C	C/C	C/C	C/C	C/C	C/C	C/C	C/C	C/C	C/C	C/C	C/C	C/C	C/C
Jcr4S01574	21599	Jcr4S01574_21599	GO:0015074;GO:0003676	DNA integration	-	nucleic acid binding	-	-	-	G	T	AB=0.118651;ABP=39542.6;AC=95;AF=0.494792;AN=192;AO=3714;CIGAR=1X;DP=31306;DPRA=82.3737;EPP=8067.86;EPPR=62.8607;GTI=0;HWE=1042.78;LEN=1;MEANALT=1.04211;MQM=13.3998;MQMR=8.33598;NS=96;NUMALT=1;ODDS=0;PAIRED=0;PAIREDR=0;RO=27588;RPP=2868.95;RPPR=59848.8;RUN=1;SAP=2868.95;SRP=60.9543;TYPE=snp;XAI=4.0132e-05;XAM=0.000729305;XAS=0.000689173;XRI=0.000347692;XRM=0.00764601;XRS=0.00729832;technology.Ill…	NON_SYNONYMOUS_CODING(MODERATE|MISSENSE|Cat/Aat|H1022N|1259|Jcr4S01574.50|protein_coding|CODING|Jcr4S01574.50|1|1);UPSTREAM(MODIFIER||3319||41|Jcr4S01574.40|protein_coding|CODING|Jcr4S01574.40||1);UPSTREAM(MODIFIER||4720||249|Jcr4S01574.30|protein_coding|CODING|Jcr4S01574.30||1)	G/G	G/G	G/G	G/G	G/G	G/G	G/G	G/G	G/G	G/G	G/G	G/G	G/G	G/G	G/G	G/G	G/G	G/G	G/G	G/G	G/G	G/G	G/G	G/G	G/G	G/G	G/T	G/G	G/G	G/G	G/G	G/G	G/G	G/G	G/G	G/G
Jcr4S01574	21607	Jcr4S01574_21607	GO:0015074;GO:0003676	DNA integration	-	nucleic acid binding	-	-	-	C	T	AB=0.115755;ABP=39676;AC=95;AF=0.494792;AN=192;AO=3598;CIGAR=1X;DP=31264;DPRA=0;EPP=2881.72;EPPR=91.0436;GTI=0;HWE=1042.78;LEN=1;MEANALT=1.03125;MQM=13.2852;MQMR=8.40274;NS=96;NUMALT=1;ODDS=0;PAIRED=0;PAIREDR=0;RO=27663;RPP=7514.92;RPPR=60072.5;RUN=1;SAP=2700.15;SRP=91.0436;TYPE=snp;XAI=3.44431e-05;XAM=0.000870931;XAS=0.000836488;XRI=0.000346527;XRM=0.00764465;XRS=0.00729812;technology.Illumina=1…	NON_SYNONYMOUS_CODING(MODERATE|MISSENSE|aGa/aAa|R1019K|1259|Jcr4S01574.50|protein_coding|CODING|Jcr4S01574.50|1|1);UPSTREAM(MODIFIER||3327||41|Jcr4S01574.40|protein_coding|CODING|Jcr4S01574.40||1);UPSTREAM(MODIFIER||4728||249|Jcr4S01574.30|protein_coding|CODING|Jcr4S01574.30||1)	C/C	C/C	C/C	C/C	C/C	C/C	C/C	C/C	C/C	C/C	C/C	C/C	C/C	C/C	C/C	C/C	C/C	C/C	C/C	C/C	C/C	C/C	C/C	C/C	C/C	C/C	C/C	C/C	C/T	C/C	C/C	C/C	C/C	C/C	C/C	C/C
Jcr4S04951	23633	Jcr4S04951_23633	GO:0015074;GO:0008270;GO:0003676	DNA integration	-	zinc ion binding; nucleic acid binding	-	-	-	G	C	AB=0.12552;ABP=19314.2;AC=92;AF=0.479167;AN=192;AO=2010;CIGAR=1X;DP=16215;DPRA=85.3316;EPP=143.022;EPPR=1030.55;GTI=0;HWE=854.765;LEN=1;MEANALT=1.06316;MQM=0;MQMR=0;NS=96;NUMALT=1;ODDS=0;PAIRED=0;PAIREDR=0;RO=14198;RPP=4307.08;RPPR=20817.8;RUN=1;SAP=132.344;SRP=3.7175;TYPE=snp;XAI=0;XAM=0.000543915;XAS=0.000543915;XRI=1.30628e-05;XRM=0.00456335;XRS=0.00455029;technology.Illumina=1;BVAR;SURRSEQ=TG…	DOWNSTREAM(MODIFIER||4111||239|Jcr4S04951.50|protein_coding|CODING|Jcr4S04951.50||1);NON_SYNONYMOUS_CODING(MODERATE|MISSENSE|cCa/cGa|P560R|1014|Jcr4S04951.40|protein_coding|CODING|Jcr4S04951.40|3|1);UPSTREAM(MODIFIER||4277||1551|Jcr4S04951.30|protein_coding|CODING|Jcr4S04951.30||1)	G/G	G/G	G/G	G/G	G/G	G/G	G/G	G/G	G/G	G/G	G/G	G/G	G/G	G/G	G/G	G/G	G/G	G/G	G/G	G/G	G/G	G/G	G/G	G/G	G/G	G/G	G/G	G/G	G/G	G/G	G/G	G/G	G/G	G/G	G/G	G/G
Jcr4S04951	23661	Jcr4S04951_23661	GO:0015074;GO:0008270;GO:0003676	DNA integration	-	zinc ion binding; nucleic acid binding	-	-	-	A	C	AB=0.116863;ABP=21060.2;AC=97;AF=0.505208;AN=192;AO=1932;CIGAR=1X;DP=16517;DPRA=0;EPP=4198.29;EPPR=16.8621;GTI=0;HWE=1042.78;LEN=1;MEANALT=1.02083;MQM=0;MQMR=0;NS=96;NUMALT=1;ODDS=0;PAIRED=0;PAIREDR=0;RO=14583;RPP=113.827;RPPR=31530.8;RUN=1;SAP=113.827;SRP=19.9212;TYPE=snp;XAI=0;XAM=0.00473998;XAS=0.00473998;XRI=1.4641e-05;XRM=0.00405175;XRS=0.00403711;technology.Illumina=1;BVAR;SURRSEQ=GCTGGCCTT…	DOWNSTREAM(MODIFIER||4083||239|Jcr4S04951.50|protein_coding|CODING|Jcr4S04951.50||1);NON_SYNONYMOUS_CODING(MODERATE|MISSENSE|Tta/Gta|L551V|1014|Jcr4S04951.40|protein_coding|CODING|Jcr4S04951.40|3|1);UPSTREAM(MODIFIER||4305||1551|Jcr4S04951.30|protein_coding|CODING|Jcr4S04951.30||1)	A/A	A/A	A/A	A/A	A/A	A/A	A/A	A/A	A/A	A/A	A/A	A/A	A/A	A/A	A/A	A/A	A/A	A/A	A/A	A/A	A/A	A/A	A/A	A/A	A/A	A/A	A/A	A/A	A/A	A/A	A/A	A/A	A/A	A/A	A/A	A/A
Jcr4S04951	23692	Jcr4S04951_23692	GO:0015074;GO:0008270;GO:0003676	DNA integration	-	zinc ion binding; nucleic acid binding	-	-	-	C	T	AB=0.11966;ABP=10650.5;AC=94;AF=0.489583;AN=192;AO=1019;CIGAR=1X;DP=8562;DPRA=90.1158;EPP=2207.06;EPPR=16354.2;GTI=0;HWE=972.993;LEN=1;MEANALT=1.01053;MQM=0;MQMR=0;NS=96;NUMALT=1;ODDS=0;PAIRED=0;PAIREDR=0;RO=7542;RPP=2215.74;RPPR=16380.3;RUN=1;SAP=2207.06;SRP=16354.2;TYPE=snp;XAI=0;XAM=0.00074694;XAS=0.00074694;XRI=1.46261e-05;XRM=0.00389542;XRS=0.0038808;technology.Illumina=1;BVAR;SURRSEQ=ATGCTA…	DOWNSTREAM(MODIFIER||4052||239|Jcr4S04951.50|protein_coding|CODING|Jcr4S04951.50||1);SYNONYMOUS_CODING(LOW|SILENT|acG/acA|T540|1014|Jcr4S04951.40|protein_coding|CODING|Jcr4S04951.40|3|1);UPSTREAM(MODIFIER||4336||1551|Jcr4S04951.30|protein_coding|CODING|Jcr4S04951.30||1)	C/C	C/C	C/C	C/C	C/C	C/C	C/C	C/C	C/C	C/C	C/C	C/C	C/C	C/C	C/C	C/C	C/C	C/C	C/C	C/C	C/C	C/C	C/C	C/C	C/C	C/C	C/C	C/C	C/C	C/C	C/C	C/C	C/C	C/C	C/C	C/C
Jcr4S01574	24676	Jcr4S01574_24676	-	-	-	-	-	-	-	A	G	AB=0.0972048;ABP=3380.94;AC=56;AF=0.291667;AN=192;AO=306;CIGAR=1X;DP=4116;DPRA=1.92308;EPP=667.481;EPPR=8086.33;GTI=0;HWE=-128.311;LEN=1;MEANALT=1;MQM=0;MQMR=0;NS=96;NUMALT=1;ODDS=0;PAIRED=0;PAIREDR=0;RO=3810;RPP=667.481;RPPR=8155.16;RUN=1;SAP=667.481;SRP=8206.98;TYPE=snp;XAI=0.000101071;XAM=0.000479305;XAS=0.000378233;XRI=2.87739e-05;XRM=0.00252399;XRS=0.00249522;technology.Illumina=1;BVAR;SURRS…	DOWNSTREAM(MODIFIER||2864||74|Jcr4S01574.60|protein_coding|CODING|Jcr4S01574.60||1);INTERGENIC(MODIFIER||||||||||1);UPSTREAM(MODIFIER||14||1259|Jcr4S01574.50|protein_coding|CODING|Jcr4S01574.50||1)	A/A	A/A	A/A	A/A	A/A	A/A	./.	A/A	A/A	A/A	A/A	A/A	A/A	A/A	A/A	A/A	A/A	A/A	A/A	A/A	A/A	A/A	A/G	A/A	A/A	A/A	A/A	A/A	A/A	A/A	A/A	A/A	A/A	A/A	A/A	A/A
Jcr4S01020	48074	Jcr4S01020_48074	-	-	-	-	-	-	-	G	T	AB=0.0869565;ABP=1707.14;AC=16;AF=0.0842105;AN=190;AO=337;CIGAR=1X;DP=7832;DPRA=1.03187;EPP=717.528;EPPR=25.5276;GTI=0;HWE=-271.819;LEN=1;MEANALT=2.30769;MQM=37;MQMR=37;NS=95;NUMALT=1;ODDS=0;PAIRED=0;PAIREDR=0;RO=7240;RPP=726.136;RPPR=15003.3;RUN=1;SAP=726.136;SRP=6.38028;TYPE=snp;XAI=6.11827e-05;XAM=0.00883595;XAS=0.00877477;XRI=0.000108971;XRM=0.000818945;XRS=0.000709975;technology.Illumina=1;B…	UPSTREAM(MODIFIER||346||927|Jcr4S01020.80|protein_coding|CODING|Jcr4S01020.80||1)	G/G	G/G	G/G	G/G	G/G	G/G	G/G	G/G	G/G	G/G	G/G	G/G	G/G	G/G	G/G	G/G	G/G	G/G	G/G	G/G	G/G	G/G	G/G	G/G	G/G	G/G	G/G	G/G	G/G	G/G	G/G	G/G	G/G	G/G	G/G	G/G
Jcr4S00667	51370	Jcr4S00667_51370	-	-	-	-	-	-	-	C	G	AB=0.877095;ABP=1992.82;AC=169;AF=0.889474;AN=190;AO=7141;CIGAR=1X;DP=7487;DPRA=0;EPP=9.58128;EPPR=25.7097;GTI=0;HWE=-298.678;LEN=1;MEANALT=1.08421;MQM=22.8681;MQMR=16.1111;NS=95;NUMALT=1;ODDS=0;PAIRED=0;PAIREDR=0;RO=333;RPP=15492.1;RPPR=726.111;RUN=1;SAP=9.22854;SRP=25.7097;TYPE=snp;XAI=8.7403e-05;XAM=0.0104132;XAS=0.0103258;XRI=0.000201823;XRM=0.0128445;XRS=0.0126427;technology.Illumina=1;BVAR;…	DOWNSTREAM(MODIFIER||1670||586|Jcr4S00667.70|protein_coding|CODING|Jcr4S00667.70||1);DOWNSTREAM(MODIFIER||3999||79|Jcr4S00667.50|protein_coding|CODING|Jcr4S00667.50||1);START_LOST(HIGH|MISSENSE|atG/atC|M1I|387|Jcr4S00667.60|protein_coding|CODING|Jcr4S00667.60|1|1)	G/G	G/G	G/G	G/G	G/G	G/G	G/G	G/G	G/G	G/G	G/G	G/G	G/G	G/G	G/G	G/G	G/G	G/G	G/G	G/G	G/G	G/G	G/G	G/G	G/G	G/G	G/G	G/G	G/G	G/G	G/G	C/G	G/G	G/G	G/G	G/G
Jcr4S00667	51371	Jcr4S00667_51371	-	-	-	-	-	-	-	A	C	AB=0.87065;ABP=1820.38;AC=170;AF=0.894737;AN=190;AO=7185;CIGAR=1X;DP=7526;DPRA=0;EPP=17.5052;EPPR=23.9454;GTI=0;HWE=-294.578;LEN=1;MEANALT=1.02105;MQM=22.8441;MQMR=16.1068;NS=95;NUMALT=1;ODDS=0;PAIRED=0;PAIREDR=0;RO=337;RPP=15579;RPPR=734.797;RUN=1;SAP=16.7219;SRP=23.9454;TYPE=snp;XAI=8.83175e-05;XAM=0.0104305;XAS=0.0103422;XRI=0.000199428;XRM=0.0127767;XRS=0.0125773;technology.Illumina=1;BVAR;SU…	DOWNSTREAM(MODIFIER||1669||586|Jcr4S00667.70|protein_coding|CODING|Jcr4S00667.70||1);DOWNSTREAM(MODIFIER||4000||79|Jcr4S00667.50|protein_coding|CODING|Jcr4S00667.50||1);START_LOST(HIGH|MISSENSE|aTg/aGg|M1R|387|Jcr4S00667.60|protein_coding|CODING|Jcr4S00667.60|1|1)	C/C	C/C	C/C	C/C	C/C	C/C	C/C	C/C	C/C	C/C	C/C	C/C	C/C	C/C	C/C	C/C	C/C	C/C	C/C	C/C	C/C	C/C	C/C	C/C	C/C	C/C	C/C	C/C	C/C	C/C	C/C	A/C	C/C	C/C	C/C	C/C
Jcr4S00030	109512	Jcr4S00030_109512	-	-	-	-	-	-	-	C	G	AB=0.0968132;ABP=9351.7;AC=80;AF=0.416667;AN=192;AO=687;CIGAR=1X;DP=7724;DPRA=81.2947;EPP=1494.81;EPPR=13657.3;GTI=0;HWE=375.859;LEN=1;MEANALT=2;MQM=0;MQMR=0;NS=96;NUMALT=1;ODDS=0;PAIRED=0;PAIREDR=0;RO=6324;RPP=1494.81;RPPR=13657.3;RUN=1;SAP=1494.81;SRP=13735.4;TYPE=snp;XAI=3.00125e-05;XAM=0.0104107;XAS=0.0103807;XRI=1.7966e-05;XRM=0.00285271;XRS=0.00283474;technology.Illumina=1;BVAR;SURRSEQ=TTGA…	DOWNSTREAM(MODIFIER||148||288|Jcr4S00030.240|protein_coding|CODING|Jcr4S00030.240||1);INTERGENIC(MODIFIER||||||||||1);UPSTREAM(MODIFIER||1205||1203|Jcr4S00030.220|protein_coding|CODING|Jcr4S00030.220||1);UPSTREAM(MODIFIER||890||78|Jcr4S00030.230|protein_coding|CODING|Jcr4S00030.230||1)	C/C	C/C	C/C	C/C	C/C	C/C	C/C	C/C	C/C	C/C	C/C	C/C	C/C	C/C	C/C	C/C	C/C	C/C	C/C	C/C	C/C	C/C	C/C	C/C	C/C	C/C	C/C	C/C	C/C	C/C	C/C	C/C	C/C	C/C	C/C	C/C
Jcr4S00030	109520	Jcr4S00030_109520	-	-	-	-	-	-	-	C	T	AB=0.0943692;ABP=7287.36;AC=62;AF=0.322917;AN=192;AO=577;CIGAR=1X;DP=7724;DPRA=3.00629;EPP=1221.45;EPPR=15513.8;GTI=0;HWE=-37.7356;LEN=1;MEANALT=1;MQM=0;MQMR=0.00279838;NS=96;NUMALT=1;ODDS=0;PAIRED=0;PAIREDR=0;RO=7147;RPP=1221.45;RPPR=15522.5;RUN=1;SAP=1255.95;SRP=15513.8;TYPE=snp;XAI=3.57341e-05;XAM=0.000831414;XAS=0.00079568;XRI=1.58971e-05;XRM=0.00471545;XRS=0.00469955;technology.Illumina=1;BV…	DOWNSTREAM(MODIFIER||140||288|Jcr4S00030.240|protein_coding|CODING|Jcr4S00030.240||1);INTERGENIC(MODIFIER||||||||||1);UPSTREAM(MODIFIER||1213||1203|Jcr4S00030.220|protein_coding|CODING|Jcr4S00030.220||1);UPSTREAM(MODIFIER||898||78|Jcr4S00030.230|protein_coding|CODING|Jcr4S00030.230||1)	C/C	C/T	C/C	C/C	C/C	C/C	C/C	C/C	C/C	C/C	C/C	C/C	C/C	C/C	C/C	C/C	C/C	C/C	C/C	C/C	C/C	C/C	C/C	C/C	C/C	C/C	C/C	C/C	C/C	C/C	C/C	C/C	C/C	C/C	C/C	C/C
Jcr4S11160	166	Jcr4S11160_166	-	-	-	-	-	-	-	C	T	AB=0.118379;ABP=4779.52;AC=77;AF=0.405263;AN=190;AO=474;CIGAR=1X;DP=4535;DPRA=1.86329;EPP=6.60193;EPPR=19.7789;GTI=0;HWE=307.99;LEN=1;MEANALT=1.02174;MQM=18.3523;MQMR=17.9367;NS=95;NUMALT=1;ODDS=0;PAIRED=0;PAIREDR=0;RO=4057;RPP=603.345;RPPR=8468.66;RUN=1;SAP=6.60193;SRP=8.04638;TYPE=snp;XAI=0;XAM=0.0129928;XAS=0.0129928;XRI=1.19287e-05;XRM=0.00976573;XRS=0.0097538;technology.Illumina=1;BVAR;SURRS…	SYNONYMOUS_CODING(LOW|SILENT|ctC/ctT|L20|96|Jcr4S11160.10|protein_coding|CODING|Jcr4S11160.10|1|1|WARNING_TRANSCRIPT_NO_START_CODON)	C/C	C/C	C/C	C/C	C/C	C/C	C/C	C/C	C/C	C/C	C/C	C/C	C/C	C/C	C/C	C/C	C/C	C/C	./.	C/C	C/C	C/C	C/C	C/C	C/C	C/C	C/C	C/C	C/C	C/C	C/C	C/C	C/C	C/C	C/C	C/C
Jcr4S16965	369	Jcr4S16965_369	-	-	-	-	-	-	-	G	A	AB=0.111721;ABP=6203.44;AC=78;AF=0.410526;AN=190;AO=569;CIGAR=1X;DP=5640;DPRA=0;EPP=6.2198;EPPR=27.4703;GTI=0;HWE=336.871;LEN=1;MEANALT=1;MQM=0;MQMR=0;NS=95;NUMALT=1;ODDS=0;PAIRED=0;PAIREDR=0;RO=5071;RPP=1238.58;RPPR=10584.5;RUN=1;SAP=6.2198;SRP=15.5317;TYPE=snp;XAI=0;XAM=0.010147;XAS=0.010147;XRI=6.09896e-06;XRM=0.00374359;XRS=0.00373749;technology.Illumina=1;BVAR;SURRSEQ=GCACGGGCGTGCTACATGGCACG…	DOWNSTREAM(MODIFIER||125||287|Jcr4S16965.10|protein_coding|CODING|Jcr4S16965.10||1);INTERGENIC(MODIFIER||||||||||1)	G/G	G/G	G/G	G/G	G/A	G/G	G/G	G/G	G/G	G/G	G/G	G/G	G/G	G/G	G/G	G/G	G/G	G/G	G/G	G/G	G/G	G/G	G/G	G/G	G/G	G/A	G/G	G/G	G/G	G/G	G/G	G/G	G/G	G/G	G/G	G/G
Jcr4S11175	429	Jcr4S11175_429	GO:0004523;GO:0003676	-	-	nucleic acid binding; ribonuclease H activity	EC:3.1.26.4	-	-	G	A	AB=0.105273;ABP=14555.5;AC=84;AF=0.4375;AN=192;AO=1193;CIGAR=1X;DP=12007;DPRA=42.1193;EPP=2323.08;EPPR=14016.8;GTI=0;HWE=508.043;LEN=1;MEANALT=1;MQM=0;MQMR=0;NS=96;NUMALT=1;ODDS=0;PAIRED=0;PAIREDR=0;RO=10814;RPP=2331.31;RPPR=23346.5;RUN=1;SAP=2584.9;SRP=14070.6;TYPE=snp;XAI=5.19389e-05;XAM=0.000634679;XAS=0.00058274;XRI=3.05822e-06;XRM=0.00445997;XRS=0.00445691;technology.Illumina=1;BVAR;SURRSEQ=…	SYNONYMOUS_CODING(LOW|SILENT|acG/acA|T143|215|Jcr4S11175.10|protein_coding|CODING|Jcr4S11175.10|1|1|WARNING_TRANSCRIPT_NO_START_CODON)	G/G	G/G	G/G	G/G	G/G	G/G	G/G	G/G	G/G	G/G	G/G	G/G	G/G	G/G	G/G	G/G	G/G	G/G	G/G	G/G	G/G	G/G	G/G	G/G	G/G	G/G	G/G	G/G	G/G	G/G	G/G	G/G	G/G	G/G	G/G	G/G
Jcr4S05447	563	Jcr4S05447_563	-	-	-	-	-	-	-	C	T	AB=0.120334;ABP=16640.1;AC=96;AF=0.5;AN=192;AO=1605;CIGAR=1X;DP=13387;DPRA=0;EPP=3488.22;EPPR=25559.1;GTI=0;HWE=1438.19;LEN=1;MEANALT=1.04167;MQM=0;MQMR=0;NS=96;NUMALT=1;ODDS=0;PAIRED=0;PAIREDR=0;RO=11777;RPP=3488.22;RPPR=25559.1;RUN=1;SAP=3488.22;SRP=25576.4;TYPE=snp;XAI=6.42323e-06;XAM=0.0103442;XAS=0.0103378;XRI=5.25224e-06;XRM=0.00584833;XRS=0.00584308;technology.Illumina=1;BVAR;SURRSEQ=GGTGA…	INTERGENIC(MODIFIER||||||||||1);UPSTREAM(MODIFIER||413||175|Jcr4S05447.10|protein_coding|CODING|Jcr4S05447.10||1);UPSTREAM(MODIFIER||4567||388|Jcr4S05447.20|protein_coding|CODING|Jcr4S05447.20||1)	C/C	C/C	C/C	C/C	C/C	C/C	C/C	C/C	C/C	C/C	C/C	C/C	C/C	C/C	C/C	C/C	C/C	C/T	C/C	C/C	C/C	C/C	C/C	C/C	C/C	C/C	C/C	C/C	C/C	C/C	C/C	C/C	C/C	C/C	C/C	C/C
Jcr4S06711	714	Jcr4S06711_714	-	-	-	-	-	-	-	C	G	AB=0.134012;ABP=16125;AC=94;AF=0.489583;AN=192;AO=1864;CIGAR=1X;DP=13984;DPRA=147.189;EPP=4050.63;EPPR=11657.6;GTI=0;HWE=972.993;LEN=1;MEANALT=1.07368;MQM=0;MQMR=0;NS=96;NUMALT=1;ODDS=0;PAIRED=0;PAIREDR=0;RO=12113;RPP=4050.63;RPPR=11657.6;RUN=1;SAP=4050.63;SRP=26306.1;TYPE=snp;XAI=1.10615e-05;XAM=0.0109568;XAS=0.0109458;XRI=3.16615e-05;XRM=0.00744655;XRS=0.00741489;technology.Illumina=1;BVAR;SURR…	INTRON(MODIFIER||||811|Jcr4S06711.10|protein_coding|CODING|Jcr4S06711.10|1|1);UPSTREAM(MODIFIER||2289||297|Jcr4S06711.20|protein_coding|CODING|Jcr4S06711.20||1)	C/C	C/C	C/C	C/C	C/C	C/C	C/C	C/C	C/C	C/C	C/C	C/C	C/C	C/C	C/C	C/C	C/C	C/C	C/C	C/C	C/C	C/C	C/C	C/C	C/C	C/C	C/C	C/C	C/C	C/C	C/C	C/C	C/C	C/C	C/C	C/C
Jcr4S06711	719	Jcr4S06711_719	-	-	-	-	-	-	-	C	T	AB=0.134796;ABP=16057.1;AC=94;AF=0.489583;AN=192;AO=1875;CIGAR=1X;DP=13983;DPRA=147.179;EPP=4074.52;EPPR=12344;GTI=0;HWE=972.993;LEN=1;MEANALT=1.01053;MQM=0;MQMR=0;NS=96;NUMALT=1;ODDS=0;PAIRED=0;PAIREDR=0;RO=12107;RPP=4074.52;RPPR=12344;RUN=1;SAP=4074.52;SRP=26293;TYPE=snp;XAI=1.09966e-05;XAM=0.010952;XAS=0.010941;XRI=3.16772e-05;XRM=0.0074547;XRS=0.00742302;technology.Illumina=1;BVAR;SURRSEQ=AGG…	INTRON(MODIFIER||||811|Jcr4S06711.10|protein_coding|CODING|Jcr4S06711.10|1|1);UPSTREAM(MODIFIER||2284||297|Jcr4S06711.20|protein_coding|CODING|Jcr4S06711.20||1)	C/C	C/C	C/C	C/C	C/C	C/C	C/C	C/C	C/C	C/C	C/C	C/C	C/C	C/C	C/C	C/C	C/C	C/C	C/C	C/C	C/C	C/C	C/C	C/C	C/C	C/C	C/C	C/C	C/C	C/C	C/C	C/C	C/C	C/C	C/C	C/C
Jcr4U33113	944	Jcr4U33113_944	-	-	-	-	-	-	-	C	T	AB=0.126883;ABP=9313.98;AC=87;AF=0.453125;AN=192;AO=1013;CIGAR=1X;DP=8453;DPRA=0;EPP=2202.71;EPPR=16117.5;GTI=0;HWE=622.118;LEN=1;MEANALT=1.03125;MQM=0;MQMR=0;NS=96;NUMALT=1;ODDS=0;PAIRED=0;PAIREDR=0;RO=7437;RPP=2202.71;RPPR=16152.3;RUN=1;SAP=2202.71;SRP=16117.5;TYPE=snp;XAI=0;XAM=0.000714904;XAS=0.000714904;XRI=1.6649e-05;XRM=0.00377453;XRS=0.00375788;technology.Illumina=1;BVAR;SURRSEQ=ATGCTATTT…	SYNONYMOUS_CODING(LOW|SILENT|acG/acA|T156|322|Jcr4U33113.10|protein_coding|CODING|Jcr4U33113.10|1|1|WARNING_TRANSCRIPT_NO_START_CODON)	C/C	C/C	C/C	C/C	C/C	C/C	C/C	C/C	C/C	C/C	C/C	C/C	C/C	C/C	C/C	C/C	C/C	C/T	C/C	C/C	C/C	C/C	C/C	C/C	C/C	C/C	C/C	C/C	C/C	C/C	C/T	C/C	C/C	C/C	C/C	C/C
Jcr4U31811	983	Jcr4U31811_983	-	-	-	-	-	-	-	C	T	AB=0.11091;ABP=9452.35;AC=92;AF=0.479167;AN=192;AO=812;CIGAR=1X;DP=7450;DPRA=26.1298;EPP=1766.25;EPPR=7272.37;GTI=0;HWE=854.765;LEN=1;MEANALT=1;MQM=0;MQMR=0;NS=96;NUMALT=1;ODDS=0;PAIRED=0;PAIREDR=0;RO=6638;RPP=6.10171;RPPR=14287.3;RUN=1;SAP=6.10171;SRP=7180.14;TYPE=snp;XAI=1.26962e-05;XAM=0.00627759;XAS=0.00626489;XRI=0.000725275;XRM=0.00882242;XRS=0.00809714;technology.Illumina=1;BVAR;SURRSEQ=GA…	UPSTREAM(MODIFIER||857||33|Jcr4U31811.10|protein_coding|CODING|Jcr4U31811.10||1)	C/C	C/C	C/C	C/C	C/C	C/C	C/C	C/C	C/T	C/C	C/C	C/C	C/C	C/C	C/C	C/C	C/C	C/C	C/C	C/C	C/C	C/C	C/C	C/C	C/C	C/C	C/C	C/C	C/C	C/C	C/C	C/C	C/C	C/C	C/C	C/C
Jcr4S15801	1059	Jcr4S15801_1059	-	-	-	-	-	-	-	G	A	AB=0.115159;ABP=9218.79;AC=91;AF=0.473958;AN=192;AO=838;CIGAR=1X;DP=7494;DPRA=0;EPP=1822.7;EPPR=1174.73;GTI=0;HWE=802.493;LEN=1;MEANALT=1.01042;MQM=0.0274463;MQMR=4.86221;NS=96;NUMALT=1;ODDS=0;PAIRED=0;PAIREDR=0;RO=6655;RPP=1805.37;RPPR=14168.9;RUN=1;SAP=1805.37;SRP=1094.54;TYPE=snp;XAI=3.69067e-05;XAM=0.000549499;XAS=0.000512592;XRI=1.16544e-05;XRM=0.00827526;XRS=0.00826361;technology.Illumina=1…	INTERGENIC(MODIFIER||||||||||1);UPSTREAM(MODIFIER||2479||162|Jcr4S15801.10|protein_coding|CODING|Jcr4S15801.10||1)	G/G	G/G	G/G	G/G	G/G	G/G	G/G	G/G	G/G	G/G	G/G	G/G	G/G	G/G	G/G	G/G	G/G	G/G	G/G	G/G	G/G	G/G	G/G	G/G	G/G	G/G	G/G	G/G	G/G	G/G	G/G	G/G	G/G	G/G	G/G	G/G
Jcr4S20611	1069	Jcr4S20611_1069	-	-	-	-	-	-	-	A	T	AB=0.128647;ABP=10840.8;AC=90;AF=0.46875;AN=192;AO=1192;CIGAR=1X;DP=9557;DPRA=50.2895;EPP=2591.41;EPPR=18002.7;GTI=0;HWE=753.559;LEN=1;MEANALT=1;MQM=0;MQMR=0.00442319;NS=96;NUMALT=1;ODDS=0;PAIRED=0;PAIREDR=0;RO=8365;RPP=2591.41;RPPR=18167.4;RUN=1;SAP=2591.41;SRP=18002.7;TYPE=snp;XAI=1.74776e-05;XAM=0.000745118;XAS=0.00072764;XRI=5.33154e-05;XRM=0.0110455;XRS=0.0109921;technology.Illumina=1;BVAR;S…	INTERGENIC(MODIFIER||||||||||1);UPSTREAM(MODIFIER||406||115|Jcr4S20611.10|protein_coding|CODING|Jcr4S20611.10||1)	A/A	A/A	A/A	A/A	A/A	A/A	A/A	A/A	A/A	A/A	A/A	A/A	A/A	A/A	A/A	A/A	A/A	A/A	A/A	A/A	A/A	A/A	A/A	A/A	A/A	A/A	A/A	A/A	A/T	A/A	A/A	A/A	A/A	A/A	A/A	A/A
Jcr4S01470	1156	Jcr4S01470_1156	-	-	-	-	-	-	-	C	T	AB=0.129098;ABP=7620.52;AC=90;AF=0.473684;AN=190;AO=831;CIGAR=1X;DP=6554;DPRA=2.31348;EPP=1807.5;EPPR=114.101;GTI=0;HWE=791.406;LEN=1;MEANALT=1.01064;MQM=0;MQMR=0;NS=95;NUMALT=1;ODDS=0;PAIRED=0;PAIREDR=0;RO=5721;RPP=1399.34;RPPR=12391.3;RUN=1;SAP=1399.34;SRP=117.411;TYPE=snp;XAI=1.24059e-05;XAM=0.0105947;XAS=0.0105823;XRI=1.67642e-05;XRM=0.000890241;XRS=0.000873477;technology.Illumina=1;BVAR;SURR…	INTERGENIC(MODIFIER||||||||||1)	C/C	C/C	C/C	C/C	C/C	C/C	C/C	C/C	C/C	C/C	C/C	C/C	C/C	C/C	C/C	C/C	C/C	C/C	C/C	C/C	C/C	C/C	C/C	C/T	C/C	C/T	C/C	C/C	C/C	C/C	C/C	C/C	C/C	C/C	C/C	C/C
Jcr4S24806	1191	Jcr4S24806_1191	-	-	-	-	-	-	-	C	T	AB=0.115906;ABP=6238.36;AC=83;AF=0.432292;AN=192;AO=582;CIGAR=1X;DP=5369;DPRA=2.37321;EPP=1266.81;EPPR=10395.7;GTI=0;HWE=473.078;LEN=1;MEANALT=1.01075;MQM=0;MQMR=0;NS=96;NUMALT=1;ODDS=0;PAIRED=0;PAIREDR=0;RO=4786;RPP=1266.81;RPPR=10395.7;RUN=1;SAP=1266.81;SRP=10395.7;TYPE=snp;XAI=0;XAM=0.0102825;XAS=0.0102825;XRI=2.15405e-06;XRM=0.00674454;XRS=0.00674238;technology.Illumina=1;BVAR;SURRSEQ=AAATCCT…	UPSTREAM(MODIFIER||686||52|Jcr4S24806.10|protein_coding|CODING|Jcr4S24806.10||1)	C/C	C/C	C/C	C/C	C/C	C/C	C/C	C/C	C/C	C/C	C/C	C/C	C/C	C/C	C/C	C/C	C/C	./.	C/C	C/C	C/C	C/C	C/T	C/C	C/C	C/C	C/C	C/C	C/C	C/C	C/C	C/C	C/C	C/C	C/C	C/C
Jcr4S24806	1196	Jcr4S24806_1196	-	-	-	-	-	-	-	C	G	AB=0.114215;ABP=6295.97;AC=83;AF=0.432292;AN=192;AO=574;CIGAR=1X;DP=5370;DPRA=2.37366;EPP=1249.44;EPPR=10410.9;GTI=0;HWE=473.078;LEN=1;MEANALT=1.03226;MQM=0;MQMR=0;NS=96;NUMALT=1;ODDS=0;PAIRED=0;PAIREDR=0;RO=4793;RPP=1249.44;RPPR=10410.9;RUN=1;SAP=1249.44;SRP=10410.9;TYPE=snp;XAI=0;XAM=0.0102959;XAS=0.0102959;XRI=2.1509e-06;XRM=0.00675663;XRS=0.00675448;technology.Illumina=1;BVAR;SURRSEQ=CTTTGATT…	UPSTREAM(MODIFIER||691||52|Jcr4S24806.10|protein_coding|CODING|Jcr4S24806.10||1)	C/C	C/C	C/C	C/C	C/C	C/C	C/C	C/C	C/C	C/C	C/C	C/C	C/C	C/C	C/C	C/C	C/C	./.	C/C	C/C	C/C	C/C	C/G	C/C	C/C	C/C	C/C	C/C	C/C	C/C	C/C	C/C	C/C	C/C	C/C	C/C
Jcr4S13405	1363	Jcr4S13405_1363	-	-	-	-	-	-	-	A	G	AB=0.0992256;ABP=5767.68;AC=69;AF=0.359375;AN=192;AO=463;CIGAR=1X;DP=5569;DPRA=2.91274;EPP=866.164;EPPR=11071;GTI=0;HWE=94.7004;LEN=1;MEANALT=1.01075;MQM=0;MQMR=0;NS=96;NUMALT=1;ODDS=0;PAIRED=0;PAIREDR=0;RO=5105;RPP=866.164;RPPR=11088.4;RUN=1;SAP=1008.4;SRP=11071;TYPE=snp;XAI=0;XAM=0.0105019;XAS=0.0105019;XRI=1.21798e-05;XRM=0.00366634;XRS=0.00365416;technology.Illumina=1;BVAR;SURRSEQ=GAAGGTTACTA…	INTERGENIC(MODIFIER||||||||||1);UPSTREAM(MODIFIER||1960||759|Jcr4S13405.20|protein_coding|CODING|Jcr4S13405.20||1);UPSTREAM(MODIFIER||282||281|Jcr4S13405.10|protein_coding|CODING|Jcr4S13405.10||1)	A/A	A/A	A/A	A/A	A/A	A/A	A/A	A/A	A/A	A/A	A/A	A/A	A/A	A/A	A/A	A/A	A/A	A/A	A/A	A/A	A/A	A/A	A/A	A/A	A/A	A/A	A/A	A/A	./.	A/A	A/A	A/A	A/A	A/A	A/A	A/A
Jcr4S13405	1365	Jcr4S13405_1365	-	-	-	-	-	-	-	G	A	AB=0.0986858;ABP=5857.36;AC=70;AF=0.364583;AN=192;AO=462;CIGAR=1X;DP=5560;DPRA=2.90799;EPP=880.172;EPPR=11053.6;GTI=0;HWE=116.246;LEN=1;MEANALT=1.01075;MQM=0;MQMR=0;NS=96;NUMALT=1;ODDS=0;PAIRED=0;PAIREDR=0;RO=5097;RPP=880.172;RPPR=11071;RUN=1;SAP=1006.23;SRP=11053.6;TYPE=snp;XAI=0;XAM=0.0105546;XAS=0.0105546;XRI=1.21989e-05;XRM=0.00366953;XRS=0.00365733;technology.Illumina=1;BVAR;SURRSEQ=AGGTTACT…	INTERGENIC(MODIFIER||||||||||1);UPSTREAM(MODIFIER||1958||759|Jcr4S13405.20|protein_coding|CODING|Jcr4S13405.20||1);UPSTREAM(MODIFIER||280||281|Jcr4S13405.10|protein_coding|CODING|Jcr4S13405.10||1)	G/G	G/G	G/G	G/G	G/G	G/G	G/G	G/G	G/G	G/G	G/G	G/G	G/G	G/G	G/G	G/G	G/G	G/G	G/G	G/G	G/G	G/G	G/G	G/G	G/G	G/G	G/G	G/G	./.	G/G	G/G	G/G	G/G	G/G	G/G	G/G
Jcr4S08160	1489	Jcr4S08160_1489	-	-	-	-	-	-	-	T	G	AB=0.0960881;ABP=3734.12;AC=56;AF=0.291667;AN=192;AO=328;CIGAR=1X;DP=4507;DPRA=1.60322;EPP=689.434;EPPR=9075.42;GTI=0;HWE=-128.311;LEN=1;MEANALT=1.01087;MQM=0;MQMR=0;NS=96;NUMALT=1;ODDS=0;PAIRED=0;PAIREDR=0;RO=4178;RPP=689.434;RPPR=9075.42;RUN=1;SAP=715.253;SRP=9075.42;TYPE=snp;XAI=0;XAM=0.0103312;XAS=0.0103312;XRI=2.46752e-06;XRM=0.0053595;XRS=0.00535703;technology.Illumina=1;BVAR;SURRSEQ=TAGATA…	INTERGENIC(MODIFIER||||||||||1)	T/T	T/T	T/T	T/T	T/T	T/T	T/T	T/T	T/T	T/T	T/T	T/T	T/T	T/T	T/T	T/T	T/T	T/T	T/T	T/T	T/T	T/G	T/T	T/T	T/T	T/T	T/T	T/T	T/T	T/T	T/T	T/T	T/T	T/T	T/T	T/T
Jcr4U30796	1516	Jcr4U30796_1516	-	-	-	-	-	-	-	T	C	AB=0.126619;ABP=23749.3;AC=95;AF=0.494792;AN=192;AO=2483;CIGAR=1X;DP=19613;DPRA=68.807;EPP=5394.78;EPPR=13591;GTI=0;HWE=1042.78;LEN=1;MEANALT=1.01053;MQM=0;MQMR=4.55829;NS=96;NUMALT=1;ODDS=0;PAIRED=0;PAIREDR=0;RO=17129;RPP=5299.65;RPPR=36756.5;RUN=1;SAP=5299.65;SRP=13860;TYPE=snp;XAI=4.47487e-06;XAM=0.0101272;XAS=0.0101227;XRI=4.16439e-06;XRM=0.00980079;XRS=0.00979662;technology.Illumina=1;BVAR;S…	DOWNSTREAM(MODIFIER||2693||177|Jcr4U30796.10|protein_coding|CODING|Jcr4U30796.10||1);DOWNSTREAM(MODIFIER||3865||84|Jcr4U30796.20|protein_coding|CODING|Jcr4U30796.20||1);INTERGENIC(MODIFIER||||||||||1)	T/T	T/T	T/T	T/T	T/T	T/T	T/T	T/T	T/T	T/T	T/T	T/T	T/T	T/T	T/T	T/T	T/T	T/T	T/T	T/T	T/T	T/T	T/T	T/T	T/T	T/T	T/T	T/T	T/T	T/T	T/T	T/T	T/T	T/T	T/T	T/T
Jcr4S18859	1572	Jcr4S18859_1572	-	-	-	-	-	-	-	G	A	AB=0.131606;ABP=19386;AC=93;AF=0.484375;AN=192;AO=2171;CIGAR=1X;DP=16592;DPRA=87.3158;EPP=570.143;EPPR=4158.61;GTI=0;HWE=911.165;LEN=1;MEANALT=1.02105;MQM=0.0165822;MQMR=16.0552;NS=96;NUMALT=1;ODDS=0;PAIRED=0;PAIREDR=0;RO=14419;RPP=4717.28;RPPR=5411.9;RUN=1;SAP=570.143;SRP=14251.8;TYPE=snp;XAI=0;XAM=0.00368762;XAS=0.00368762;XRI=1.81582e-06;XRM=0.0108761;XRS=0.0108743;technology.Illumina=1;BVAR;S…	INTERGENIC(MODIFIER||||||||||1)	G/G	G/G	G/G	G/G	G/G	G/G	G/G	G/G	G/G	G/G	G/G	G/G	G/G	G/G	G/G	G/G	G/G	G/G	G/G	G/G	G/G	G/A	G/G	G/G	G/G	G/G	G/G	G/G	G/G	G/G	G/G	G/G	G/G	G/G	G/G	G/G
Jcr4S02809	1987	Jcr4S02809_1987	-	-	-	-	-	-	-	T	G	AB=0.125496;ABP=4914.89;AC=82;AF=0.427083;AN=192;AO=537;CIGAR=1X;DP=4655;DPRA=24.4895;EPP=565.608;EPPR=8936.45;GTI=0;HWE=439.45;LEN=1;MEANALT=1;MQM=36.8883;MQMR=37;NS=96;NUMALT=1;ODDS=0;PAIRED=0;PAIREDR=0;RO=4118;RPP=565.608;RPPR=8945.13;RUN=1;SAP=1169.09;SRP=8936.45;TYPE=snp;XAI=2.11613e-05;XAM=0.015312;XAS=0.0152908;XRI=2.82539e-05;XRM=0.00110211;XRS=0.00107386;technology.Illumina=1;BVAR;SURRSE…	INTERGENIC(MODIFIER||||||||||1)	T/T	T/T	T/T	T/T	T/T	T/T	T/T	T/T	T/T	T/T	T/T	T/T	T/T	T/T	T/T	T/T	T/T	T/T	T/T	T/T	T/T	T/T	T/T	T/T	T/T	T/T	T/T	T/T	T/T	T/T	T/T	T/T	T/T	T/T	T/T	T/T
Jcr4S01299	2281	Jcr4S01299_2281	-	-	-	-	-	-	-	C	G	AB=0.0969345;ABP=6815.92;AC=81;AF=0.421875;AN=192;AO=495;CIGAR=1X;DP=5526;DPRA=3.26882;EPP=1077.89;EPPR=10919;GTI=0;HWE=407.07;LEN=1;MEANALT=1.04301;MQM=0;MQMR=0.0109409;NS=96;NUMALT=1;ODDS=0;PAIRED=0;PAIREDR=0;RO=5027;RPP=1077.89;RPPR=10919;RUN=1;SAP=1077.89;SRP=10919;TYPE=snp;XAI=0;XAM=0.000535972;XAS=0.000535972;XRI=1.44883e-05;XRM=0.00834387;XRS=0.00832938;technology.Illumina=1;BVAR;SURRSEQ=C…	INTERGENIC(MODIFIER||||||||||1);UPSTREAM(MODIFIER||1021||114|Jcr4S01299.10|protein_coding|CODING|Jcr4S01299.10||1)	C/C	C/C	C/C	C/C	C/C	C/C	C/C	C/C	C/C	C/C	C/C	C/C	C/C	C/C	C/C	C/C	C/C	C/C	C/C	C/C	C/C	C/G	C/C	C/C	C/C	C/C	C/C	C/C	C/C	C/G	C/C	C/C	C/C	C/C	C/C	C/C
Jcr4S11034	2311	Jcr4S11034_2311	GO:0015074;GO:0003676	DNA integration	-	nucleic acid binding	-	-	-	A	G	AB=0.108311;ABP=10842.3;AC=70;AF=0.364583;AN=192;AO=994;CIGAR=1X;DP=10852;DPRA=13.5607;EPP=3.43848;EPPR=51.6691;GTI=0;HWE=116.246;LEN=1;MEANALT=1;MQM=18.1026;MQMR=17.6454;NS=96;NUMALT=1;ODDS=0;PAIRED=0;PAIREDR=0;RO=9858;RPP=2161.45;RPPR=12645.9;RUN=1;SAP=3.43848;SRP=73.0789;TYPE=snp;XAI=5.26833e-05;XAM=0.00703676;XAS=0.00698407;XRI=0.00290044;XRM=0.0131018;XRS=0.0102014;technology.Illumina=1;BVAR…	SYNONYMOUS_CODING(LOW|SILENT|cgT/cgC|R1620|1677|Jcr4S11034.20|protein_coding|CODING|Jcr4S11034.20|3|1);UPSTREAM(MODIFIER||705||411|Jcr4S11034.10|protein_coding|CODING|Jcr4S11034.10||1)	A/A	A/A	A/A	A/A	A/A	A/A	A/A	A/A	A/A	A/A	A/A	A/A	A/A	A/A	A/A	A/A	A/A	A/A	A/A	A/A	A/A	A/A	A/A	A/A	A/A	A/A	A/A	A/A	A/A	A/A	A/A	A/A	A/A	A/A	A/A	A/A
Jcr4S08858	2637	Jcr4S08858_2637	-	-	-	-	-	-	-	A	C	AB=0.115287;ABP=12112.9;AC=77;AF=0.401042;AN=192;AO=1166;CIGAR=1X;DP=11079;DPRA=58.3;EPP=2491.7;EPPR=633.161;GTI=0;HWE=288.598;LEN=1;MEANALT=1.01053;MQM=15.9503;MQMR=14.5968;NS=96;NUMALT=1;ODDS=0;PAIRED=0;PAIREDR=0;RO=9912;RPP=2534.95;RPPR=21518;RUN=1;SAP=2491.7;SRP=634.649;TYPE=snp;XAI=0;XAM=0.0104298;XAS=0.0104298;XRI=3.12024e-06;XRM=0.00801496;XRS=0.00801184;technology.Illumina=1;BVAR;SURRSEQ=…	DOWNSTREAM(MODIFIER||1061||74|Jcr4S08858.20|protein_coding|CODING|Jcr4S08858.20||1);INTERGENIC(MODIFIER||||||||||1);UPSTREAM(MODIFIER||203||205|Jcr4S08858.10|protein_coding|CODING|Jcr4S08858.10||1)	A/A	A/A	A/A	A/A	A/A	A/C	A/A	A/A	A/A	A/A	A/A	A/A	A/A	A/A	A/A	A/A	A/A	A/A	A/A	A/A	A/A	A/A	A/A	A/A	A/A	A/A	A/A	A/A	A/A	A/A	A/A	A/A	A/A	A/A	A/A	A/A
Jcr4S01877	3960	Jcr4S01877_3960	GO:0015074;GO:0008270;GO:0003676	DNA integration	-	zinc ion binding; nucleic acid binding	-	-	-	G	A	AB=0.120432;ABP=21917.4;AC=93;AF=0.484375;AN=192;AO=2130;CIGAR=1X;DP=17890;DPRA=62.7614;EPP=4628.25;EPPR=13479.8;GTI=0;HWE=911.165;LEN=1;MEANALT=1.03158;MQM=19.9225;MQMR=2.4261;NS=96;NUMALT=1;ODDS=0;PAIRED=0;PAIREDR=0;RO=15757;RPP=4567.65;RPPR=25947.9;RUN=1;SAP=4567.65;SRP=19600.4;TYPE=snp;XAI=9.48452e-06;XAM=0.0100828;XAS=0.0100733;XRI=1.70025e-05;XRM=0.00622763;XRS=0.00621062;technology.Illumin…	DOWNSTREAM(MODIFIER||3133||207|Jcr4S01877.30|protein_coding|CODING|Jcr4S01877.30||1);NON_SYNONYMOUS_CODING(MODERATE|MISSENSE|tCt/tTt|S467F|1314|Jcr4S01877.20|protein_coding|CODING|Jcr4S01877.20|1|1);UPSTREAM(MODIFIER||3521||102|Jcr4S01877.10|protein_coding|CODING|Jcr4S01877.10||1)	G/G	G/G	G/G	G/G	G/G	G/G	G/G	G/G	G/G	G/G	G/G	G/G	G/G	G/G	G/G	G/G	G/G	G/G	G/G	G/G	G/G	G/G	G/G	G/G	G/G	G/G	G/G	G/G	G/A	G/G	G/G	G/G	G/G	G/G	G/G	G/G
Jcr4S19394	4046	Jcr4S19394_4046	GO:0015074;GO:0008270;GO:0003676	DNA integration	-	nucleic acid binding; zinc ion binding	-	-	-	C	T	AB=0.103438;ABP=9299.7;AC=82;AF=0.427083;AN=192;AO=750;CIGAR=1X;DP=7767;DPRA=40.8684;EPP=1631.61;EPPR=15227.2;GTI=0;HWE=439.45;LEN=1;MEANALT=1.02105;MQM=0;MQMR=0;NS=96;NUMALT=1;ODDS=0;PAIRED=0;PAIREDR=0;RO=7015;RPP=1631.61;RPPR=15235.9;RUN=1;SAP=1631.61;SRP=15227.2;TYPE=snp;XAI=0;XAM=0.0102887;XAS=0.0102887;XRI=4.40881e-06;XRM=0.00429893;XRS=0.00429452;technology.Illumina=1;BVAR;SURRSEQ=CCAGCTATT…	NON_SYNONYMOUS_CODING(MODERATE|MISSENSE|tCa/tTa|S537L|1061|Jcr4S19394.10|protein_coding|CODING|Jcr4S19394.10|5|1|WARNING_TRANSCRIPT_INCOMPLETE)	C/C	C/C	C/C	C/C	C/C	C/C	C/C	C/C	C/C	C/C	C/C	C/C	C/C	C/C	C/C	C/C	C/C	C/C	C/C	C/C	C/C	C/C	C/C	C/C	C/T	C/C	C/C	C/C	C/C	C/C	C/C	C/C	C/C	C/C	C/C	C/C
Jcr4S05580	4272	Jcr4S05580_4272	-	-	-	-	-	-	-	T	C	AB=0.124494;ABP=58990.8;AC=95;AF=0.494792;AN=192;AO=5996;CIGAR=1X;DP=48165;DPRA=253.489;EPP=3.53325;EPPR=10.0242;GTI=0;HWE=1042.78;LEN=1;MEANALT=1.08421;MQM=17.4144;MQMR=17.3678;NS=96;NUMALT=1;ODDS=0;PAIRED=0;PAIREDR=0;RO=42155;RPP=13023.2;RPPR=91524.1;RUN=1;SAP=3.53325;SRP=9.87294;TYPE=snp;XAI=3.43872e-06;XAM=0.000674319;XAS=0.000670881;XRI=5.91485e-06;XRM=0.00361741;XRS=0.00361149;technology.Il…	INTERGENIC(MODIFIER||||||||||1);UPSTREAM(MODIFIER||1538||118|Jcr4S05580.10|protein_coding|CODING|Jcr4S05580.10||1);UPSTREAM(MODIFIER||2958||663|Jcr4S05580.20|protein_coding|CODING|Jcr4S05580.20||1)	T/T	T/T	T/T	T/T	T/T	T/T	T/T	T/T	T/T	T/T	T/T	T/T	T/T	T/T	T/T	T/T	T/T	T/T	T/T	T/T	T/T	T/T	T/T	T/T	T/T	T/T	T/T	T/T	T/T	T/T	T/T	T/T	T/T	T/T	T/T	T/T
Jcr4S20161	4450	Jcr4S20161_4450	-	-	-	-	-	-	-	T	C	AB=0.14083;ABP=15876.1;AC=93;AF=0.484375;AN=192;AO=2001;CIGAR=1X;DP=14333;DPRA=75.4263;EPP=4348.13;EPPR=1967.66;GTI=0;HWE=911.165;LEN=1;MEANALT=1.02105;MQM=0;MQMR=23.0319;NS=96;NUMALT=1;ODDS=0;PAIRED=0;PAIREDR=0;RO=12330;RPP=4348.13;RPPR=25847.4;RUN=1;SAP=4348.13;SRP=2229.98;TYPE=snp;XAI=1.11731e-05;XAM=0.000792408;XAS=0.000781235;XRI=8.36113e-06;XRM=0.00546002;XRS=0.00545166;technology.Illumina=…	INTERGENIC(MODIFIER||||||||||1)	T/T	T/T	T/T	T/T	T/T	T/T	T/T	T/T	T/T	T/T	T/T	T/T	T/T	T/T	T/T	T/T	T/T	T/T	T/T	T/T	T/T	T/T	T/T	T/T	T/T	T/T	T/T	T/T	T/T	T/T	T/T	T/T	T/T	T/T	T/T	T/T
Jcr4S08348	4548	Jcr4S08348_4548	-	-	-	-	-	-	-	C	T	AB=0.117617;ABP=4991.66;AC=83;AF=0.432292;AN=192;AO=486;CIGAR=1X;DP=4484;DPRA=1.73762;EPP=1049.68;EPPR=8645.51;GTI=0;HWE=473.078;LEN=1;MEANALT=1.02105;MQM=0;MQMR=0.0415415;NS=96;NUMALT=1;ODDS=0;PAIRED=0;PAIREDR=0;RO=3996;RPP=1058.35;RPPR=8680.21;RUN=1;SAP=1049.68;SRP=8645.51;TYPE=snp;XAI=0;XAM=0.000588769;XAS=0.000588769;XRI=2.5799e-06;XRM=0.00585061;XRS=0.00584803;technology.Illumina=1;BVAR;SURR…	DOWNSTREAM(MODIFIER||1106||188|Jcr4S08348.20|protein_coding|CODING|Jcr4S08348.20||1);INTERGENIC(MODIFIER||||||||||1);UPSTREAM(MODIFIER||1577||1203|Jcr4S08348.30|protein_coding|CODING|Jcr4S08348.30||1);UPSTREAM(MODIFIER||2363||453|Jcr4S08348.10|protein_coding|CODING|Jcr4S08348.10||1)	C/C	C/C	C/C	C/C	C/C	C/C	C/C	C/C	C/C	C/C	C/C	C/C	C/C	C/C	C/C	C/C	C/C	C/C	C/C	C/T	C/T	C/C	C/C	C/C	C/C	C/C	C/C	C/C	C/C	C/C	C/C	C/C	C/C	C/C	C/C	C/C
Jcr4S11434	5027	Jcr4S11434_5027	-	-	-	-	-	-	-	C	T	AB=0.112993;ABP=8684.09;AC=85;AF=0.442708;AN=192;AO=785;CIGAR=1X;DP=7379;DPRA=8.61988;EPP=3.0352;EPPR=4.27617;GTI=0;HWE=544.451;LEN=1;MEANALT=1;MQM=0;MQMR=0;NS=96;NUMALT=1;ODDS=0;PAIRED=0;PAIREDR=0;RO=6594;RPP=1673.05;RPPR=14295.7;RUN=1;SAP=3.07946;SRP=4.35916;TYPE=snp;XAI=0;XAM=0.010371;XAS=0.010371;XRI=2.18881e-05;XRM=0.00215171;XRS=0.00212982;technology.Illumina=1;BVAR;SURRSEQ=ACAAGGGTCCCTAGGC…	INTERGENIC(MODIFIER||||||||||1);UPSTREAM(MODIFIER||1597||1101|Jcr4S11434.20|protein_coding|CODING|Jcr4S11434.20||1);UPSTREAM(MODIFIER||2023||1000|Jcr4S11434.10|protein_coding|CODING|Jcr4S11434.10||1)	C/C	C/C	C/C	C/C	C/C	C/C	C/C	C/C	C/C	C/C	C/C	C/C	C/C	C/C	C/C	C/C	C/C	C/C	C/C	C/C	C/C	C/C	C/C	C/C	C/C	C/T	C/C	C/C	./.	C/C	C/C	./.	C/C	C/C	C/C	C/C
Jcr4S06971	5148	Jcr4S06971_5148	-	-	-	-	-	-	-	A	C	AB=0.126697;ABP=10435.7;AC=85;AF=0.442708;AN=192;AO=1136;CIGAR=1X;DP=9506;DPRA=100.053;EPP=691.153;EPPR=1034.12;GTI=0;HWE=544.451;LEN=1;MEANALT=1.05263;MQM=0;MQMR=0;NS=96;NUMALT=1;ODDS=0;PAIRED=0;PAIREDR=0;RO=8365;RPP=2315.93;RPPR=18167.4;RUN=1;SAP=776.207;SRP=1034.12;TYPE=snp;XAI=2.72252e-05;XAM=0.00320733;XAS=0.0031801;XRI=1.51326e-05;XRM=0.00667367;XRS=0.00665854;technology.Illumina=1;BVAR;SUR…	DOWNSTREAM(MODIFIER||275||121|Jcr4S06971.20|protein_coding|CODING|Jcr4S06971.20||1);DOWNSTREAM(MODIFIER||4563||86|Jcr4S06971.10|protein_coding|CODING|Jcr4S06971.10||1);INTERGENIC(MODIFIER||||||||||1)	A/A	A/A	A/A	A/A	A/A	A/A	A/A	A/A	A/C	A/A	A/A	A/A	A/A	A/A	A/A	A/A	A/A	A/A	A/A	A/A	A/A	A/A	A/A	A/A	A/A	A/A	A/A	A/A	A/A	A/A	A/A	A/A	A/A	A/A	A/A	A/A
Jcr4S21514	5819	Jcr4S21514_5819	-	-	-	-	-	-	-	C	T	AB=0.10685;ABP=5569.23;AC=76;AF=0.4;AN=190;AO=479;CIGAR=1X;DP=5021;DPRA=1.29216;EPP=1043.15;EPPR=9859.32;GTI=0;HWE=280.097;LEN=1;MEANALT=1.02128;MQM=0;MQMR=0;NS=95;NUMALT=1;ODDS=0;PAIRED=0;PAIREDR=0;RO=4539;RPP=1043.15;RPPR=9859.32;RUN=1;SAP=1043.15;SRP=9859.32;TYPE=snp;XAI=6.45675e-05;XAM=0.000628411;XAS=0.000563844;XRI=6.8138e-06;XRM=0.00428155;XRS=0.00427473;technology.Illumina=1;BVAR;SURRSEQ=…	DOWNSTREAM(MODIFIER||3860||429|Jcr4S21514.10|protein_coding|CODING|Jcr4S21514.10||1);INTRON(MODIFIER||||1577|Jcr4S21514.20|protein_coding|CODING|Jcr4S21514.20|1|1)	C/C	C/T	C/C	C/C	C/C	C/C	C/C	C/C	C/C	C/C	C/C	C/C	C/C	C/C	C/C	C/C	C/C	C/C	C/C	C/C	C/C	C/C	C/C	C/C	C/C	C/C	C/C	C/C	./.	C/C	C/C	C/C	C/C	C/C	C/C	C/C
Jcr4U31076	5883	Jcr4U31076_5883	-	-	-	-	-	-	-	C	G	AB=0.123322;ABP=9736.56;AC=90;AF=0.46875;AN=192;AO=993;CIGAR=1X;DP=8352;DPRA=21.9684;EPP=2159.28;EPPR=3.02919;GTI=0;HWE=753.559;LEN=1;MEANALT=1.02105;MQM=0;MQMR=8.00625;NS=96;NUMALT=1;ODDS=0;PAIRED=0;PAIREDR=0;RO=7356;RPP=2159.28;RPPR=15933;RUN=1;SAP=2159.28;SRP=3.01148;TYPE=snp;XAI=0;XAM=0.00557912;XAS=0.00557912;XRI=2.09144e-06;XRM=0.00696878;XRS=0.00696669;technology.Illumina=1;BVAR;SURRSEQ=AT…	INTERGENIC(MODIFIER||||||||||1);UPSTREAM(MODIFIER||2107||398|Jcr4U31076.10|protein_coding|CODING|Jcr4U31076.10||1)	C/C	C/C	C/C	C/C	C/C	C/C	C/C	C/C	C/C	C/C	C/C	C/C	C/C	C/C	C/C	C/C	C/C	C/C	C/C	C/C	C/C	C/C	C/C	C/C	C/C	C/C	C/C	C/C	C/C	C/C	C/C	C/C	C/C	C/C	C/C	C/C
Jcr4S13894	5895	Jcr4S13894_5895	-	-	-	-	-	-	-	G	A	AB=0.12036;ABP=22666.8;AC=92;AF=0.479167;AN=192;AO=2208;CIGAR=1X;DP=18663;DPRA=49.1026;EPP=8.39571;EPPR=1009.72;GTI=0;HWE=854.765;LEN=1;MEANALT=1.07368;MQM=27.7939;MQMR=17.8813;NS=96;NUMALT=1;ODDS=0;PAIRED=0;PAIREDR=0;RO=16443;RPP=4797.62;RPPR=8339.07;RUN=1;SAP=8.39571;SRP=5.34632;TYPE=snp;XAI=0.0103075;XAM=0.020793;XAS=0.0104855;XRI=1.75552e-05;XRM=0.0117818;XRS=0.0117642;technology.Illumina=1;B…	DOWNSTREAM(MODIFIER||1887||326|Jcr4S13894.20|protein_coding|CODING|Jcr4S13894.20||1);UPSTREAM(MODIFIER||3827||82|Jcr4S13894.10|protein_coding|CODING|Jcr4S13894.10||1)	G/G	G/G	G/G	G/G	G/G	G/G	G/G	G/G	G/G	G/G	G/G	G/G	G/G	G/G	G/G	G/G	G/G	G/G	G/G	G/G	G/G	G/G	G/G	G/G	G/G	G/G	G/G	G/G	G/G	G/G	G/G	G/G	G/G	G/G	G/G	G/G
Jcr4S13894	5951	Jcr4S13894_5951	-	-	-	-	-	-	-	C	T	AB=0.119177;ABP=22717.6;AC=90;AF=0.46875;AN=192;AO=2204;CIGAR=1X;DP=19039;DPRA=50.0921;EPP=32.8395;EPPR=54.0484;GTI=0;HWE=753.559;LEN=1;MEANALT=1.01053;MQM=27.9256;MQMR=17.8158;NS=96;NUMALT=1;ODDS=0;PAIRED=0;PAIREDR=0;RO=16833;RPP=4788.94;RPPR=36269.3;RUN=1;SAP=32.8395;SRP=65.321;TYPE=snp;XAI=0.0103545;XAM=0.0206825;XAS=0.0103279;XRI=1.59236e-05;XRM=0.0118121;XRS=0.0117962;technology.Illumina=1;B…	DOWNSTREAM(MODIFIER||1943||326|Jcr4S13894.20|protein_coding|CODING|Jcr4S13894.20||1);UPSTREAM(MODIFIER||3883||82|Jcr4S13894.10|protein_coding|CODING|Jcr4S13894.10||1)	C/C	C/C	C/C	C/C	C/C	C/C	C/C	C/C	C/C	C/C	C/C	C/C	C/C	C/C	C/C	C/C	C/C	C/C	C/C	C/C	C/C	C/C	C/C	C/C	C/C	C/C	C/C	C/C	C/C	C/C	C/C	C/C	C/C	C/C	C/C	C/C
Jcr4S13547	5962	Jcr4S13547_5962	-	-	-	-	-	-	-	C	T	AB=0.103942;ABP=8955.92;AC=78;AF=0.40625;AN=192;AO=753;CIGAR=1X;DP=8003;DPRA=84.2316;EPP=14.4559;EPPR=47.094;GTI=0;HWE=316.679;LEN=1;MEANALT=1.92632;MQM=0;MQMR=0;NS=96;NUMALT=1;ODDS=0;PAIRED=0;PAIREDR=0;RO=6890;RPP=1638.13;RPPR=11160.6;RUN=1;SAP=14.4559;SRP=22.708;TYPE=snp;XAI=0;XAM=0.00303619;XAS=0.00303619;XRI=0.000567768;XRM=0.0056457;XRS=0.00507793;technology.Illumina=1;BVAR;SURRSEQ=CTCTGTAGC…	DOWNSTREAM(MODIFIER||2061||418|Jcr4S13547.20|protein_coding|CODING|Jcr4S13547.20||1);DOWNSTREAM(MODIFIER||4216||539|Jcr4S13547.10|protein_coding|CODING|Jcr4S13547.10||1);INTERGENIC(MODIFIER||||||||||1);UPSTREAM(MODIFIER||1397||2065|Jcr4S13547.30|protein_coding|CODING|Jcr4S13547.30||1)	C/C	C/C	C/C	C/C	C/C	C/C	C/C	C/C	C/C	C/C	C/C	C/C	C/C	C/C	C/C	C/C	C/C	C/C	C/C	C/C	C/C	C/C	C/T	C/C	C/T	C/C	C/C	C/C	C/C	C/C	C/C	C/C	C/C	C/C	C/C	C/C
Jcr4S02588	7105	Jcr4S02588_7105	GO:0008270	-	-	zinc ion binding	-	-	-	C	T	AB=0.100035;ABP=4017.28;AC=57;AF=0.296875;AN=192;AO=360;CIGAR=1X;DP=4850;DPRA=2.20276;EPP=767.465;EPPR=9631.7;GTI=0;HWE=-114.573;LEN=1;MEANALT=1;MQM=0.55;MQMR=0.976169;NS=96;NUMALT=1;ODDS=0;PAIRED=0;PAIREDR=0;RO=4490;RPP=758.9;RPPR=9735.56;RUN=1;SAP=776.079;SRP=9614.44;TYPE=snp;XAI=0;XAM=0.0100053;XAS=0.0100053;XRI=7.50621e-05;XRM=0.0158612;XRS=0.0157861;technology.Illumina=1;BVAR;SURRSEQ=AATGTTG…	DOWNSTREAM(MODIFIER||4437||103|Jcr4S02588.30|protein_coding|CODING|Jcr4S02588.30||1);NON_SYNONYMOUS_CODING(MODERATE|MISSENSE|gCa/gTa|A536V|909|Jcr4S02588.10|protein_coding|CODING|Jcr4S02588.10|4|1);UPSTREAM(MODIFIER||2119||91|Jcr4S02588.20|protein_coding|CODING|Jcr4S02588.20||1)	C/C	C/C	C/C	C/C	C/C	C/C	C/C	C/C	C/C	C/C	C/C	C/C	C/C	C/C	C/C	C/T	C/C	C/C	C/C	C/C	C/C	C/C	C/C	C/C	C/C	C/C	C/C	C/C	./.	C/C	C/C	C/C	C/C	C/C	C/C	C/C
Jcr4S07271	7601	Jcr4S07271_7601	-	-	-	-	-	-	-	C	T	AB=0.12242;ABP=7083.7;AC=87;AF=0.453125;AN=192;AO=726;CIGAR=1X;DP=6262;DPRA=32.9474;EPP=1377.93;EPPR=12011.3;GTI=0;HWE=622.118;LEN=1;MEANALT=1.02105;MQM=0;MQMR=0;NS=96;NUMALT=1;ODDS=0;PAIRED=0;PAIREDR=0;RO=5534;RPP=1377.93;RPPR=12011.3;RUN=1;SAP=1579.5;SRP=12019.9;TYPE=snp;XAI=1.42001e-05;XAM=0.000702897;XAS=0.000688697;XRI=0;XRM=0.00067267;XRS=0.00067267;technology.Illumina=1;BVAR;SURRSEQ=ATGAAA…	DOWNSTREAM(MODIFIER||2059||157|Jcr4S07271.20|protein_coding|CODING|Jcr4S07271.20||1);INTERGENIC(MODIFIER||||||||||1);UPSTREAM(MODIFIER||4600||65|Jcr4S07271.10|protein_coding|CODING|Jcr4S07271.10||1)	C/C	C/C	C/C	C/C	C/C	C/C	C/T	C/C	C/C	C/C	C/C	C/C	C/C	C/T	C/C	C/C	C/C	C/C	C/C	C/C	C/C	C/C	C/C	C/C	C/C	C/C	C/C	C/C	C/C	C/C	C/C	C/C	C/C	C/C	C/C	C/C
Jcr4S01079	7813	Jcr4S01079_7813	GO:0015074;GO:0008270;GO:0003676	DNA integration	-	nucleic acid binding; zinc ion binding	-	-	-	G	A	AB=0.122925;ABP=8110.86;AC=89;AF=0.463542;AN=192;AO=829;CIGAR=1X;DP=7031;DPRA=12.3246;EPP=1803.16;EPPR=13444.4;GTI=0;HWE=707.426;LEN=1;MEANALT=1;MQM=0;MQMR=0;NS=96;NUMALT=1;ODDS=0;PAIRED=0;PAIREDR=0;RO=6202;RPP=1803.16;RPPR=13470.5;RUN=1;SAP=1803.16;SRP=13444.4;TYPE=snp;XAI=0;XAM=0.000751861;XAS=0.000751861;XRI=2.00193e-05;XRM=0.00834045;XRS=0.00832043;technology.Illumina=1;BVAR;SURRSEQ=GGAAACTCA…	SYNONYMOUS_CODING(LOW|SILENT|gcG/gcA|A658|2592|Jcr4S01079.20|protein_coding|CODING|Jcr4S01079.20|11|1)	G/G	G/G	G/G	G/G	G/G	G/G	G/G	G/G	G/G	G/G	G/G	G/A	G/G	G/G	G/G	G/G	G/G	G/G	G/G	G/G	G/G	G/G	G/G	G/G	G/G	G/G	G/G	G/G	G/G	G/G	G/G	G/A	G/G	G/G	G/G	G/G
Jcr4S01469	7816	Jcr4S01469_7816	-	-	-	-	-	-	-	C	T	AB=0.110478;ABP=7172.32;AC=78;AF=0.40625;AN=192;AO=647;CIGAR=1X;DP=6571;DPRA=17.2816;EPP=1407.95;EPPR=12856;GTI=0;HWE=316.679;LEN=1;MEANALT=1.01053;MQM=0.171561;MQMR=12.7093;NS=96;NUMALT=1;ODDS=0;PAIRED=0;PAIREDR=0;RO=5923;RPP=1407.95;RPPR=12856;RUN=1;SAP=1407.95;SRP=12864.6;TYPE=snp;XAI=0;XAM=0.0102531;XAS=0.0102531;XRI=1.74055e-06;XRM=0.0137868;XRS=0.0137851;technology.Illumina=1;BVAR;SURRSEQ=A…	INTERGENIC(MODIFIER||||||||||1)	C/C	C/C	C/C	C/C	C/C	C/C	C/C	C/C	C/C	C/C	C/C	C/C	C/C	C/C	C/C	C/C	C/C	C/C	C/C	C/C	C/C	C/C	C/C	C/C	C/C	C/C	C/C	C/C	C/C	C/C	C/C	C/C	C/C	C/C	C/C	C/C
Jcr4S13360	7868	Jcr4S13360_7868	-	-	-	-	-	-	-	C	T	AB=0.114327;ABP=4421.54;AC=73;AF=0.380208;AN=192;AO=436;CIGAR=1X;DP=4338;DPRA=2.86303;EPP=941.106;EPPR=8447.89;GTI=0;HWE=185.271;LEN=1;MEANALT=1.01064;MQM=0;MQMR=0.0412715;NS=96;NUMALT=1;ODDS=0;PAIRED=0;PAIREDR=0;RO=3901;RPP=949.772;RPPR=8473.92;RUN=1;SAP=941.106;SRP=8447.89;TYPE=snp;XAI=0;XAM=0.000538289;XAS=0.000538289;XRI=5.28545e-06;XRM=0.00610804;XRS=0.00610275;technology.Illumina=1;BVAR;SUR…	INTERGENIC(MODIFIER||||||||||1);UPSTREAM(MODIFIER||2788||133|Jcr4S13360.20|protein_coding|CODING|Jcr4S13360.20||1)	C/C	C/C	./.	C/C	C/C	C/C	C/C	C/C	C/C	C/C	C/C	C/C	C/C	C/C	C/C	C/C	C/C	C/C	C/C	C/C	C/C	C/C	C/C	C/C	C/C	C/C	C/C	C/C	C/C	C/C	C/C	C/C	C/C	C/C	C/C	C/C
Jcr4S01079	7896	Jcr4S01079_7896	GO:0015074;GO:0008270;GO:0003676	DNA integration	-	nucleic acid binding; zinc ion binding	-	-	-	C	T	AB=0.139526;ABP=8569.54;AC=91;AF=0.473958;AN=192;AO=1068;CIGAR=1X;DP=7810;DPRA=11.7338;EPP=2322.14;EPPR=14595.3;GTI=0;HWE=802.493;LEN=1;MEANALT=1.02105;MQM=0;MQMR=0;NS=96;NUMALT=1;ODDS=0;PAIRED=0;PAIREDR=0;RO=6740;RPP=2322.14;RPPR=14638.7;RUN=1;SAP=2322.14;SRP=14595.3;TYPE=snp;XAI=0;XAM=0.0101612;XAS=0.0101612;XRI=0.00182126;XRM=0.00712368;XRS=0.00530242;technology.Illumina=1;BVAR;SURRSEQ=GGTCAAC…	NON_SYNONYMOUS_CODING(MODERATE|MISSENSE|tCa/tTa|S686L|2592|Jcr4S01079.20|protein_coding|CODING|Jcr4S01079.20|11|1)	C/C	C/C	C/C	C/C	C/C	C/C	C/C	C/C	C/C	C/C	C/C	C/C	C/C	C/C	C/C	C/C	C/C	C/C	C/C	C/C	C/C	C/C	C/C	C/C	C/C	C/C	C/C	C/C	C/C	C/C	C/C	C/C	C/C	C/T	C/C	C/C
Jcr4S00104	9170	Jcr4S00104_9170	-	-	-	-	-	-	-	C	A	AB=0.128354;ABP=7424.35;AC=93;AF=0.489474;AN=190;AO=797;CIGAR=1X;DP=6298;DPRA=0;EPP=1733.67;EPPR=11948.3;GTI=0;HWE=961.36;LEN=1;MEANALT=1;MQM=0;MQMR=0;NS=95;NUMALT=1;ODDS=0;PAIRED=0;PAIREDR=0;RO=5501;RPP=1733.67;RPPR=11948.3;RUN=1;SAP=1733.67;SRP=11948.3;TYPE=snp;XAI=5.17404e-05;XAM=0.000402293;XAS=0.000350553;XRI=2.44606e-05;XRM=0.000538471;XRS=0.00051401;technology.Illumina=1;BVAR;SURRSEQ=TAGAA…	DOWNSTREAM(MODIFIER||608||367|Jcr4S00104.30|protein_coding|CODING|Jcr4S00104.30||1);DOWNSTREAM(MODIFIER||735||241|Jcr4S00104.20|protein_coding|CODING|Jcr4S00104.20||1);INTERGENIC(MODIFIER||||||||||1);UPSTREAM(MODIFIER||3426||1696|Jcr4S00104.40|protein_coding|CODING|Jcr4S00104.40||1)	C/C	C/C	C/C	C/C	C/C	C/C	C/C	C/C	C/C	C/C	C/C	C/C	C/C	C/C	C/C	C/C	C/C	C/C	C/C	C/A	C/C	C/C	C/C	C/C	C/C	C/C	C/C	C/C	C/C	C/C	C/C	C/C	C/C	C/C	C/C	C/C
Jcr4S04486	9688	Jcr4S04486_9688	-	-	-	-	-	-	-	C	T	AB=0.108108;ABP=11355.1;AC=86;AF=0.447917;AN=192;AO=967;CIGAR=1X;DP=9456;DPRA=24.8737;EPP=2102.82;EPPR=18043.5;GTI=0;HWE=582.426;LEN=1;MEANALT=1.02105;MQM=0;MQMR=0;NS=96;NUMALT=1;ODDS=0;PAIRED=0;PAIREDR=0;RO=8487;RPP=2102.82;RPPR=18034.9;RUN=1;SAP=2102.82;SRP=18423.6;TYPE=snp;XAI=0;XAM=0.00538008;XAS=0.00538008;XRI=7.28828e-06;XRM=0.00537888;XRS=0.0053716;technology.Illumina=1;BVAR;SURRSEQ=AACATG…	UPSTREAM(MODIFIER||342||124|Jcr4S04486.20|protein_coding|CODING|Jcr4S04486.20||1)	C/C	C/C	C/C	C/C	C/C	C/C	C/C	C/C	C/C	./.	C/C	C/C	C/C	C/C	C/C	C/C	C/C	C/C	C/C	C/C	C/C	C/C	C/C	C/T	C/C	C/C	C/C	C/C	C/C	C/C	C/C	C/C	C/C	C/C	C/C	C/C
Jcr4S04940	10917	Jcr4S04940_10917	GO:0015074;GO:0008270;GO:0003676	DNA integration	-	zinc ion binding; nucleic acid binding	-	-	-	C	T	AB=0.102273;ABP=5685.85;AC=76;AF=0.395833;AN=192;AO=470;CIGAR=1X;DP=5203;DPRA=2.28502;EPP=1023.6;EPPR=10276.2;GTI=0;HWE=261.456;LEN=1;MEANALT=1.02128;MQM=0;MQMR=0;NS=96;NUMALT=1;ODDS=0;PAIRED=0;PAIREDR=0;RO=4731;RPP=1023.6;RPPR=10276.2;RUN=1;SAP=1023.6;SRP=10276.2;TYPE=snp;XAI=0;XAM=0.000749367;XAS=0.000749367;XRI=2.17909e-06;XRM=0.00620465;XRS=0.00620247;technology.Illumina=1;BVAR;SURRSEQ=ACTCTC…	SYNONYMOUS_CODING(LOW|SILENT|ccG/ccA|P516|1572|Jcr4S04940.20|protein_coding|CODING|Jcr4S04940.20|1|1)	C/C	C/C	C/C	C/C	C/C	C/C	C/C	C/C	C/C	C/C	C/C	C/C	C/C	C/C	C/C	C/C	C/C	C/C	C/C	C/C	C/C	C/C	C/C	C/C	C/C	C/C	C/C	C/C	C/C	C/C	C/C	C/C	C/C	C/C	C/C	C/C
Jcr4S05622	11092	Jcr4S05622_11092	GO:0015074;GO:0004523;GO:0003676	DNA integration	-	nucleic acid binding; ribonuclease H activity	EC:3.1.26.4	-	-	C	T	AB=0.137769;ABP=12386.8;AC=95;AF=0.494792;AN=192;AO=1497;CIGAR=1X;DP=10869;DPRA=38.1263;EPP=3253.7;EPPR=2198.09;GTI=0;HWE=1042.78;LEN=1;MEANALT=1.12632;MQM=9.99666;MQMR=9.98216;NS=96;NUMALT=1;ODDS=0;PAIRED=0;PAIREDR=0;RO=9360;RPP=3253.7;RPPR=2200.95;RUN=1;SAP=3253.7;SRP=20319.3;TYPE=snp;XAI=3.4294e-05;XAM=0.000784024;XAS=0.00074973;XRI=2.53104e-05;XRM=0.00554922;XRS=0.00552391;technology.Illumina…	DOWNSTREAM(MODIFIER||1432||415|Jcr4S05622.30|protein_coding|CODING|Jcr4S05622.30||1);DOWNSTREAM(MODIFIER||3196||669|Jcr4S05622.20|protein_coding|CODING|Jcr4S05622.20||1);NON_SYNONYMOUS_CODING(MODERATE|MISSENSE|Gac/Aac|D951N|1229|Jcr4S05622.40|protein_coding|CODING|Jcr4S05622.40|3|1)	C/C	C/C	C/C	C/C	C/C	C/C	C/C	C/T	C/C	C/C	C/C	C/C	C/C	C/C	C/C	C/C	C/C	C/C	C/C	C/C	C/C	C/C	C/C	C/C	C/C	C/C	C/C	C/C	C/C	C/C	C/C	C/C	C/C	C/C	C/C	C/C
Jcr4S00036	11330	Jcr4S00036_11330	-	-	-	-	-	-	-	C	T	AB=0.125382;ABP=13954.1;AC=90;AF=0.46875;AN=192;AO=1471;CIGAR=1X;DP=12100;DPRA=127.358;EPP=3197.25;EPPR=10110.1;GTI=0;HWE=753.559;LEN=1;MEANALT=1.02105;MQM=17.4929;MQMR=24.0195;NS=96;NUMALT=1;ODDS=0;PAIRED=0;PAIREDR=0;RO=10627;RPP=1708.93;RPPR=22586.8;RUN=1;SAP=1708.93;SRP=10440.4;TYPE=snp;XAI=0;XAM=0.01016;XAS=0.01016;XRI=1.16892e-05;XRM=0.011787;XRS=0.0117753;technology.Illumina=1;BVAR;SURRSEQ=…	DOWNSTREAM(MODIFIER||337||1324|Jcr4S00036.20|protein_coding|CODING|Jcr4S00036.20||1);INTERGENIC(MODIFIER||||||||||1);UPSTREAM(MODIFIER||4034||1354|Jcr4S00036.30|protein_coding|CODING|Jcr4S00036.30||1)	C/C	C/C	C/C	C/C	C/C	C/C	C/T	C/C	C/C	C/C	C/C	C/C	C/C	C/C	C/C	C/C	C/C	C/C	C/C	C/C	C/C	C/C	C/C	C/C	C/C	C/C	C/C	C/C	C/C	C/C	C/C	C/C	C/C	C/C	C/C	C/C
Jcr4S13806	11851	Jcr4S13806_11851	-	-	-	-	-	-	-	C	T	AB=0.113873;ABP=9066.8;AC=92;AF=0.484211;AN=190;AO=805;CIGAR=1X;DP=7167;DPRA=0;EPP=1751.05;EPPR=13781;GTI=0;HWE=899.713;LEN=1;MEANALT=1.01053;MQM=0;MQMR=0;NS=95;NUMALT=1;ODDS=0;PAIRED=0;PAIREDR=0;RO=6361;RPP=1751.05;RPPR=13789.7;RUN=1;SAP=1751.05;SRP=13807.1;TYPE=snp;XAI=1.28066e-05;XAM=0.00699775;XAS=0.00698494;XRI=0.000513061;XRM=0.00809102;XRS=0.00757795;technology.Illumina=1;BVAR;SURRSEQ=TGAG…	DOWNSTREAM(MODIFIER||157||45|Jcr4S13806.40|protein_coding|CODING|Jcr4S13806.40||1);DOWNSTREAM(MODIFIER||2466||125|Jcr4S13806.20|protein_coding|CODING|Jcr4S13806.20||1);UPSTREAM(MODIFIER||875||80|Jcr4S13806.30|protein_coding|CODING|Jcr4S13806.30||1)	C/C	C/C	C/C	C/C	C/C	C/C	C/C	C/C	C/C	C/C	C/C	C/C	C/C	C/C	C/C	C/C	C/C	C/C	C/C	C/C	C/C	C/C	C/C	C/C	C/C	C/C	C/C	C/C	C/C	C/C	C/C	C/C	C/C	C/C	C/C	C/C
Jcr4S04810	12715	Jcr4S04810_12715	-	-	-	-	-	-	-	G	T	AB=0.103854;ABP=7182.4;AC=74;AF=0.385417;AN=192;AO=606;CIGAR=1X;DP=6703;DPRA=3.22002;EPP=21.5861;EPPR=31.741;GTI=0;HWE=209.83;LEN=1;MEANALT=1.01064;MQM=0;MQMR=0;NS=96;NUMALT=1;ODDS=0;PAIRED=0;PAIREDR=0;RO=6096;RPP=1167.22;RPPR=13214.3;RUN=1;SAP=44.8058;SRP=30.5398;TYPE=snp;XAI=1.71892e-05;XAM=0.0103078;XAS=0.0102906;XRI=7.04396e-06;XRM=0.00827797;XRS=0.00827092;technology.Illumina=1;BVAR;SURRSEQ=…	DOWNSTREAM(MODIFIER||2037||1356|Jcr4S04810.30|protein_coding|CODING|Jcr4S04810.30||1);INTERGENIC(MODIFIER||||||||||1);UPSTREAM(MODIFIER||1356||1910|Jcr4S04810.20|protein_coding|CODING|Jcr4S04810.20||1)	G/G	G/G	G/G	G/G	G/G	G/G	G/G	G/G	G/G	G/G	G/G	G/G	G/G	G/G	G/G	G/G	G/G	G/G	G/G	G/G	G/G	G/G	G/G	G/G	G/G	G/G	G/G	G/G	G/G	G/G	G/G	G/G	G/G	G/G	G/G	G/G
Jcr4S04810	12749	Jcr4S04810_12749	-	-	-	-	-	-	-	G	A	AB=0.108164;ABP=7141.74;AC=76;AF=0.395833;AN=192;AO=633;CIGAR=1X;DP=6618;DPRA=0.89419;EPP=22.3066;EPPR=20.4115;GTI=0;HWE=261.456;LEN=1;MEANALT=1;MQM=0;MQMR=0.0526316;NS=96;NUMALT=1;ODDS=0;PAIRED=0;PAIREDR=0;RO=5985;RPP=1377.55;RPPR=12817.5;RUN=1;SAP=22.3066;SRP=14.3771;TYPE=snp;XAI=1.88069e-05;XAM=0.00608607;XAS=0.00606726;XRI=6.92596e-06;XRM=0.00871407;XRS=0.00870714;technology.Illumina=1;BVAR;S…	DOWNSTREAM(MODIFIER||2003||1356|Jcr4S04810.30|protein_coding|CODING|Jcr4S04810.30||1);INTERGENIC(MODIFIER||||||||||1);UPSTREAM(MODIFIER||1390||1910|Jcr4S04810.20|protein_coding|CODING|Jcr4S04810.20||1)	G/G	G/G	./.	G/G	G/G	G/G	G/G	G/G	G/G	G/G	G/G	G/G	G/G	G/G	G/G	G/G	G/G	G/G	G/G	G/G	G/G	G/G	G/G	G/G	G/G	G/G	G/G	G/G	G/G	G/G	G/G	G/G	G/G	G/G	G/G	G/G
Jcr4S03060	13458	Jcr4S03060_13458	-	-	-	-	-	-	-	G	A	AB=0.10281;ABP=9999.23;AC=86;AF=0.447917;AN=192;AO=786;CIGAR=1X;DP=8033;DPRA=84.5474;EPP=32.8915;EPPR=16.5324;GTI=0;HWE=582.426;LEN=1;MEANALT=1.94737;MQM=0;MQMR=0;NS=96;NUMALT=1;ODDS=0;PAIRED=0;PAIREDR=0;RO=6881;RPP=1709.79;RPPR=14944.9;RUN=1;SAP=32.8915;SRP=16.5324;TYPE=snp;XAI=0;XAM=0.00326495;XAS=0.00326495;XRI=0.000553391;XRM=0.00568852;XRS=0.00513513;technology.Illumina=1;BVAR;SURRSEQ=AAGCAC…	DOWNSTREAM(MODIFIER||1965||1170|Jcr4S03060.40|protein_coding|CODING|Jcr4S03060.40||1);INTERGENIC(MODIFIER||||||||||1);UPSTREAM(MODIFIER||1506||1645|Jcr4S03060.30|protein_coding|CODING|Jcr4S03060.30||1)	G/G	G/G	G/G	G/G	G/G	G/G	G/G	G/G	G/G	G/G	G/G	G/G	G/G	G/G	G/G	G/G	G/G	G/G	G/G	G/G	G/G	G/A	G/G	G/G	G/G	G/G	G/G	G/G	G/A	G/G	G/G	G/G	G/G	G/G	G/G	G/G
Jcr4S01823	13667	Jcr4S01823_13667	-	-	-	-	-	-	-	G	A	AB=0.114934;ABP=7152.18;AC=83;AF=0.432292;AN=192;AO=678;CIGAR=1X;DP=6362;DPRA=66.9579;EPP=1475.27;EPPR=10837.7;GTI=0;HWE=473.078;LEN=1;MEANALT=1.01053;MQM=0;MQMR=17.1348;NS=96;NUMALT=1;ODDS=0;PAIRED=0;PAIREDR=0;RO=5683;RPP=1475.27;RPPR=10845.8;RUN=1;SAP=1475.27;SRP=12334.8;TYPE=snp;XAI=0;XAM=0.0102042;XAS=0.0102042;XRI=1.17662e-05;XRM=0.00613596;XRS=0.00612419;technology.Illumina=1;BVAR;SURRSEQ=T…	DOWNSTREAM(MODIFIER||2626||55|Jcr4S01823.30|protein_coding|CODING|Jcr4S01823.30||1);INTERGENIC(MODIFIER||||||||||1)	G/G	G/G	G/G	G/G	G/G	G/G	G/G	G/G	G/G	./.	G/G	G/G	G/G	G/G	G/G	G/G	G/A	G/G	G/G	G/G	G/G	G/G	G/G	G/G	G/G	G/G	G/G	G/G	G/G	G/G	G/G	G/G	G/G	G/G	G/G	G/G
Jcr4S09273	15571	Jcr4S09273_15571	-	-	-	-	-	-	-	C	T	AB=0.104473;ABP=4165.13;AC=65;AF=0.338542;AN=192;AO=376;CIGAR=1X;DP=4557;DPRA=1.27149;EPP=819.484;EPPR=3309.05;GTI=0;HWE=-111.481;LEN=1;MEANALT=1;MQM=0;MQMR=0;NS=96;NUMALT=1;ODDS=0;PAIRED=0;PAIREDR=0;RO=4181;RPP=819.484;RPPR=3309.05;RUN=1;SAP=819.484;SRP=9081.94;TYPE=snp;XAI=0;XAM=0.000597047;XAS=0.000597047;XRI=4.93149e-06;XRM=0.0101411;XRS=0.0101362;technology.Illumina=1;BVAR;SURRSEQ=CAGTCGCGTC…	UPSTREAM(MODIFIER||2488||147|Jcr4S09273.30|protein_coding|CODING|Jcr4S09273.30||1)	C/C	C/C	C/C	C/C	C/C	C/C	C/C	C/C	C/C	C/C	C/C	C/C	C/C	C/C	C/C	C/C	C/C	C/C	C/C	C/C	C/C	C/C	C/C	C/C	C/C	C/C	C/C	C/C	C/C	C/C	C/C	C/C	C/C	C/C	C/C	C/C
Jcr4S06990	17405	Jcr4S06990_17405	-	-	-	-	-	-	-	T	C	AB=0.123535;ABP=8931.56;AC=88;AF=0.458333;AN=192;AO=921;CIGAR=1X;DP=7733;DPRA=27.1228;EPP=1985.6;EPPR=14795.1;GTI=0;HWE=663.709;LEN=1;MEANALT=1;MQM=0;MQMR=0;NS=96;NUMALT=1;ODDS=0;PAIRED=0;PAIREDR=0;RO=6812;RPP=1985.6;RPPR=14795.1;RUN=1;SAP=2002.94;SRP=14795.1;TYPE=snp;XAI=0;XAM=0.000547094;XAS=0.000547094;XRI=0.0009218;XRM=0.00948146;XRS=0.00855966;technology.Illumina=1;BVAR;SURRSEQ=GCAGCTATTCGCA…	INTERGENIC(MODIFIER||||||||||1);UPSTREAM(MODIFIER||1475||117|Jcr4S06990.40|protein_coding|CODING|Jcr4S06990.40||1);UPSTREAM(MODIFIER||671||827|Jcr4S06990.30|protein_coding|CODING|Jcr4S06990.30||1)	T/T	T/T	T/T	T/T	T/T	T/T	T/T	T/T	T/T	T/T	T/T	T/T	T/T	T/T	T/T	T/T	T/T	T/T	T/T	T/T	T/T	T/T	T/T	T/T	T/T	T/T	T/T	T/T	T/T	T/T	T/T	T/T	T/T	T/T	T/T	T/T
Jcr4S00153	17756	Jcr4S00153_17756	-	-	-	-	-	-	-	G	A	AB=0.120416;ABP=5906.34;AC=76;AF=0.4;AN=190;AO=613;CIGAR=1X;DP=5691;DPRA=0;EPP=61.9589;EPPR=4.87597;GTI=0;HWE=280.097;LEN=1;MEANALT=1.05263;MQM=0;MQMR=0;NS=95;NUMALT=1;ODDS=0;PAIRED=0;PAIREDR=0;RO=5070;RPP=1334.12;RPPR=10719;RUN=1;SAP=61.9589;SRP=10.7008;TYPE=snp;XAI=3.71522e-05;XAM=0.000949093;XAS=0.000911941;XRI=8.13355e-06;XRM=0.00597612;XRS=0.00596798;technology.Illumina=1;BVAR;SURRSEQ=CGTGCT…	DOWNSTREAM(MODIFIER||1566||1606|Jcr4S00153.50|protein_coding|CODING|Jcr4S00153.50||1);NON_SYNONYMOUS_CODING(MODERATE|MISSENSE|Ggc/Agc|G11S|82|Jcr4S00153.40|protein_coding|CODING|Jcr4S00153.40|2|1)	G/G	G/G	G/G	G/G	G/G	G/G	G/G	G/G	G/G	G/G	G/G	G/G	G/G	G/G	G/G	G/G	G/G	G/G	G/A	G/G	G/G	G/G	G/G	G/G	G/G	G/G	G/G	G/G	G/G	G/G	G/G	G/G	G/G	G/G	G/G	G/G
Jcr4S02290	18214	Jcr4S02290_18214	GO:0015074;GO:0008270;GO:0003676	DNA integration	-	zinc ion binding; nucleic acid binding	-	-	-	G	A	AB=0.107289;ABP=6233.29;AC=72;AF=0.375;AN=192;AO=568;CIGAR=1X;DP=6120;DPRA=0;EPP=1236.41;EPPR=6754.42;GTI=0;HWE=161.506;LEN=1;MEANALT=1.02083;MQM=0;MQMR=0;NS=96;NUMALT=1;ODDS=0;PAIRED=0;PAIREDR=0;RO=5550;RPP=1236.41;RPPR=6767.43;RUN=1;SAP=1236.41;SRP=12037.3;TYPE=snp;XAI=1.81501e-05;XAM=0.0103665;XAS=0.0103484;XRI=1.48602e-05;XRM=0.00760317;XRS=0.00758831;technology.Illumina=1;BVAR;SURRSEQ=CAGCAG…	DOWNSTREAM(MODIFIER||2822||1270|Jcr4S02290.40|protein_coding|CODING|Jcr4S02290.40||1);DOWNSTREAM(MODIFIER||4821||49|Jcr4S02290.60|protein_coding|CODING|Jcr4S02290.60||1);SYNONYMOUS_CODING(LOW|SILENT|tcG/tcA|S623|1299|Jcr4S02290.50|protein_coding|CODING|Jcr4S02290.50|1|1)	G/G	G/G	G/G	G/G	G/G	G/G	G/G	G/G	G/G	G/G	G/G	G/G	G/G	G/G	G/G	G/G	G/G	G/G	G/G	G/G	G/G	G/G	G/G	G/G	G/G	G/G	G/G	G/G	G/G	G/G	G/G	G/G	G/G	G/G	G/G	G/G
Jcr4S00887	20185	Jcr4S00887_20185	GO:0015074;GO:0003676	DNA integration	-	nucleic acid binding	-	-	-	A	G	AB=0.106197;ABP=4632.69;AC=65;AF=0.338542;AN=192;AO=441;CIGAR=1X;DP=4947;DPRA=1.76078;EPP=960.63;EPPR=8869.91;GTI=0;HWE=15.2559;LEN=1;MEANALT=1.01075;MQM=29.449;MQMR=37;NS=96;NUMALT=1;ODDS=0;PAIRED=0;PAIREDR=0;RO=4505;RPP=960.63;RPPR=8869.91;RUN=1;SAP=960.63;SRP=9785.49;TYPE=snp;XAI=2.41231e-05;XAM=0.0116477;XAS=0.0116236;XRI=4.57682e-06;XRM=0.000867439;XRS=0.000862863;technology.Illumina=1;BVAR;…	DOWNSTREAM(MODIFIER||2927||305|Jcr4S00887.60|protein_coding|CODING|Jcr4S00887.60||1);NON_SYNONYMOUS_CODING(MODERATE|MISSENSE|Aag/Gag|K939E|1336|Jcr4S00887.50|protein_coding|CODING|Jcr4S00887.50|3|1);UPSTREAM(MODIFIER||3518||255|Jcr4S00887.40|protein_coding|CODING|Jcr4S00887.40||1)	A/A	A/A	A/A	A/A	A/A	A/A	A/A	A/A	A/A	A/A	A/A	A/A	A/A	A/A	A/A	A/A	A/A	A/A	A/A	A/A	A/A	A/A	A/A	A/A	A/A	A/A	A/A	A/A	A/A	A/A	A/A	A/A	A/A	A/A	A/A	A/A
Jcr4S04382	22333	Jcr4S04382_22333	-	-	-	-	-	-	-	G	A	AB=0.0994764;ABP=4261.19;AC=53;AF=0.276042;AN=192;AO=408;CIGAR=1X;DP=5511;DPRA=58;EPP=5.58626;EPPR=9.66701;GTI=0;HWE=-166.417;LEN=1;MEANALT=1.06316;MQM=0;MQMR=0;NS=96;NUMALT=1;ODDS=0;PAIRED=0;PAIREDR=0;RO=5097;RPP=854.568;RPPR=11053.6;RUN=1;SAP=7.80031;SRP=9.2478;TYPE=snp;XAI=2.52678e-05;XAM=0.000723347;XAS=0.000698079;XRI=4.0663e-06;XRM=0.00492032;XRS=0.00491625;technology.Illumina=1;BVAR;SURRSE…	DOWNSTREAM(MODIFIER||2015||418|Jcr4S04382.30|protein_coding|CODING|Jcr4S04382.30||1)	G/G	G/G	G/G	G/G	G/G	G/G	G/G	G/G	G/G	G/G	G/G	G/G	G/G	G/G	G/G	G/G	G/G	G/G	G/G	G/G	G/G	G/G	G/G	G/G	G/G	G/G	G/G	G/G	G/A	G/G	G/G	G/G	G/G	G/G	G/G	G/G
Jcr4S00068	24304	Jcr4S00068_24304	-	-	-	-	-	-	-	C	T	AB=0.118906;ABP=15036;AC=94;AF=0.489583;AN=192;AO=1418;CIGAR=1X;DP=11988;DPRA=7.41238;EPP=3082.16;EPPR=22933.8;GTI=0;HWE=972.993;LEN=1;MEANALT=1.02105;MQM=0;MQMR=0;NS=96;NUMALT=1;ODDS=0;PAIRED=0;PAIREDR=0;RO=10568;RPP=3082.16;RPPR=22951.1;RUN=1;SAP=3082.16;SRP=22933.8;TYPE=snp;XAI=2.18866e-05;XAM=0.000765997;XAS=0.000744111;XRI=4.81832e-05;XRM=0.00920342;XRS=0.00915524;technology.Illumina=1;BVAR;…	INTRON(MODIFIER||||2315|Jcr4S00068.30|protein_coding|CODING|Jcr4S00068.30|7|1)	C/C	C/C	C/C	C/C	C/C	C/C	C/C	C/C	C/C	C/C	C/C	C/C	C/C	C/C	C/C	C/C	C/C	C/C	C/C	C/C	C/C	C/C	C/C	C/C	C/C	C/C	C/C	C/C	./.	C/C	C/C	C/C	C/C	C/C	C/C	C/C
Jcr4S01574	24670	Jcr4S01574_24670	-	-	-	-	-	-	-	G	A	AB=0.114198;ABP=2935.17;AC=52;AF=0.270833;AN=192;AO=328;CIGAR=1X;DP=4057;DPRA=1.30117;EPP=706.594;EPPR=7726.9;GTI=0;HWE=-178.103;LEN=1;MEANALT=1.02353;MQM=0;MQMR=0;NS=96;NUMALT=1;ODDS=0;PAIRED=0;PAIREDR=0;RO=3727;RPP=715.253;RPPR=7811.99;RUN=1;SAP=706.594;SRP=8009.46;TYPE=snp;XAI=3.20924e-05;XAM=0.000560963;XAS=0.00052887;XRI=3.10001e-05;XRM=0.00241372;XRS=0.00238272;technology.Illumina=1;BVAR;SU…	DOWNSTREAM(MODIFIER||2870||74|Jcr4S01574.60|protein_coding|CODING|Jcr4S01574.60||1);INTERGENIC(MODIFIER||||||||||1);UPSTREAM(MODIFIER||8||1259|Jcr4S01574.50|protein_coding|CODING|Jcr4S01574.50||1)	G/G	G/G	G/G	G/G	G/G	G/G	./.	G/G	G/G	G/G	G/G	G/G	G/G	G/G	G/G	G/A	G/G	G/G	G/G	G/G	G/G	G/G	G/G	G/G	G/G	G/G	G/G	G/G	G/G	G/G	G/G	G/G	G/G	G/G	G/G	G/G
Jcr4S04767	25008	Jcr4S04767_25008	-	-	-	-	-	-	-	G	C	AB=0.0921122;ABP=2732.79;AC=47;AF=0.244792;AN=192;AO=230;CIGAR=1X;DP=3743;DPRA=1.6437;EPP=502.449;EPPR=7627.05;GTI=0;HWE=-229.162;LEN=1;MEANALT=1.02469;MQM=0;MQMR=0;NS=96;NUMALT=1;ODDS=0;PAIRED=0;PAIREDR=0;RO=3511;RPP=502.449;RPPR=7627.05;RUN=1;SAP=502.449;SRP=7627.05;TYPE=snp;XAI=0;XAM=0.000488021;XAS=0.000488021;XRI=2.96687e-06;XRM=0.0043649;XRS=0.00436194;technology.Illumina=1;BVAR;SURRSEQ=TTC…	DOWNSTREAM(MODIFIER||1742||314|Jcr4S04767.50|protein_coding|CODING|Jcr4S04767.50||1);DOWNSTREAM(MODIFIER||3319||167|Jcr4S04767.40|protein_coding|CODING|Jcr4S04767.40||1);DOWNSTREAM(MODIFIER||4495||812|Jcr4S04767.30|protein_coding|CODING|Jcr4S04767.30||1);INTERGENIC(MODIFIER||||||||||1)	G/G	G/G	G/G	G/G	G/G	G/G	G/G	G/G	G/G	G/G	G/G	G/G	G/G	G/G	G/G	G/G	G/G	G/G	G/G	G/G	G/G	./.	G/G	G/G	G/G	G/G	G/G	G/G	G/G	G/G	G/G	./.	G/G	G/G	G/G	G/G
Jcr4S01366	25410	Jcr4S01366_25410	-	-	-	-	-	-	-	C	T	AB=0.126402;ABP=13622.4;AC=93;AF=0.484375;AN=192;AO=1431;CIGAR=1X;DP=11516;DPRA=0;EPP=2939.1;EPPR=750.042;GTI=0;HWE=911.165;LEN=1;MEANALT=1.07292;MQM=0;MQMR=0.00625124;NS=96;NUMALT=1;ODDS=0;PAIRED=0;PAIREDR=0;RO=10078;RPP=2939.1;RPPR=21887.1;RUN=1;SAP=3110.39;SRP=750.042;TYPE=snp;XAI=8.03232e-06;XAM=0.00601417;XAS=0.00600613;XRI=0;XRM=0.00525764;XRS=0.00525764;technology.Illumina=1;BVAR;SURRSEQ=G…	DOWNSTREAM(MODIFIER||436||200|Jcr4S01366.30|protein_coding|CODING|Jcr4S01366.30||1);INTERGENIC(MODIFIER||||||||||1);UPSTREAM(MODIFIER||4066||168|Jcr4S01366.20|protein_coding|CODING|Jcr4S01366.20||1);UPSTREAM(MODIFIER||621||94|Jcr4S01366.40|protein_coding|CODING|Jcr4S01366.40||1)	C/C	C/C	C/C	C/C	C/C	C/C	C/C	C/C	C/C	C/C	C/C	C/C	C/C	C/C	C/C	C/C	C/C	C/C	C/C	C/C	C/C	C/C	C/C	C/C	C/C	C/C	C/C	C/C	C/C	C/C	C/C	C/C	C/C	C/C	C/C	C/C
Jcr4S24601	57	Jcr4S24601_57	-	-	-	-	-	-	-	G	A	AB=0.123506;ABP=6801.73;AC=82;AF=0.431579;AN=190;AO=729;CIGAR=1X;DP=6372;DPRA=0;EPP=1586.01;EPPR=2546.61;GTI=0;HWE=463.456;LEN=1;MEANALT=1;MQM=0;MQMR=0;NS=95;NUMALT=1;ODDS=0;PAIRED=0;PAIREDR=0;RO=5643;RPP=1586.01;RPPR=2554.53;RUN=1;SAP=1586.01;SRP=12239.3;TYPE=snp;XAI=0;XAM=0.000545897;XAS=0.000545897;XRI=1.09615e-05;XRM=0.00490079;XRS=0.00488983;technology.Illumina=1;BVAR;SURRSEQ=CACTGAGCTTTATTT…	INTERGENIC(MODIFIER||||||||||1)	G/G	G/G	G/G	G/G	G/G	G/G	G/G	G/G	G/G	G/G	G/G	G/G	G/G	G/G	G/G	G/G	G/G	G/G	G/G	G/G	G/G	G/G	G/G	G/G	G/G	G/G	G/G	G/G	./.	G/G	G/G	G/G	G/G	G/G	G/G	G/G
Jcr4S07195	257	Jcr4S07195_257	-	-	-	-	-	-	-	G	C	AB=0.109256;ABP=6436.26;AC=81;AF=0.421875;AN=192;AO=555;CIGAR=1X;DP=5564;DPRA=2.67465;EPP=1208.18;EPPR=7869.7;GTI=0;HWE=407.07;LEN=1;MEANALT=1.02174;MQM=0;MQMR=0.00798882;NS=96;NUMALT=1;ODDS=0;PAIRED=0;PAIREDR=0;RO=5007;RPP=1208.18;RPPR=7869.7;RUN=1;SAP=1208.18;SRP=10875.6;TYPE=snp;XAI=0;XAM=0.000429168;XAS=0.000429168;XRI=1.04799e-05;XRM=0.00826998;XRS=0.0082595;technology.Illumina=1;BVAR;SURRSE…	INTERGENIC(MODIFIER||||||||||1);UPSTREAM(MODIFIER||1335||277|Jcr4S07195.10|protein_coding|CODING|Jcr4S07195.10||1)	G/G	G/G	G/G	G/G	G/G	G/G	G/G	G/G	G/G	G/G	G/G	G/G	G/G	G/G	G/G	G/G	G/G	G/G	G/G	G/G	G/G	G/G	G/G	G/G	G/G	G/G	G/G	G/G	G/G	G/G	G/G	G/G	G/G	G/G	G/G	G/G
Jcr4S23424	267	Jcr4S23424_267	-	-	-	-	-	-	-	C	A	AB=0.1069;ABP=3757.17;AC=69;AF=0.359375;AN=192;AO=338;CIGAR=1X;DP=3851;DPRA=1.25447;EPP=202.015;EPPR=7618.36;GTI=0;HWE=1.02897;LEN=1;MEANALT=1.06522;MQM=0;MQMR=36.4194;NS=96;NUMALT=1;ODDS=0;PAIRED=0;PAIREDR=0;RO=3507;RPP=202.015;RPPR=7618.36;RUN=1;SAP=736.968;SRP=7618.36;TYPE=snp;XAI=0;XAM=0.00996314;XAS=0.00996314;XRI=5.14307e-05;XRM=0.000917866;XRS=0.000866435;technology.Illumina=1;BVAR;SURRSEQ…	INTERGENIC(MODIFIER||||||||||1)	C/C	C/C	C/C	C/C	C/C	C/C	C/C	C/C	C/C	C/C	C/C	C/C	C/C	C/C	C/C	C/C	C/C	C/C	C/C	C/C	C/C	C/C	C/C	C/C	C/C	C/C	C/C	C/C	./.	C/C	C/C	C/C	C/C	C/C	C/C	C/C
Jcr4U29707	384	Jcr4U29707_384	-	-	-	-	-	-	-	G	A	AB=0.111977;ABP=5036.59;AC=79;AF=0.411458;AN=192;AO=462;CIGAR=1X;DP=4534;DPRA=47.7158;EPP=1006.23;EPPR=8522.45;GTI=0;HWE=345.748;LEN=1;MEANALT=1.02105;MQM=0;MQMR=0;NS=96;NUMALT=1;ODDS=0;PAIRED=0;PAIREDR=0;RO=4070;RPP=1006.23;RPPR=8522.45;RUN=1;SAP=1006.23;SRP=8840.9;TYPE=snp;XAI=0;XAM=0.00104298;XAS=0.00104298;XRI=0;XRM=0.00288288;XRS=0.00288288;technology.Illumina=1;BVAR;SURRSEQ=GCTGGCACAAATGTGG…	NON_SYNONYMOUS_CODING(MODERATE|MISSENSE|Ccc/Tcc|P41S|167|Jcr4U29707.10|protein_coding|CODING|Jcr4U29707.10|1|1)	G/G	G/G	./.	G/G	G/G	G/G	G/G	G/G	G/G	./.	G/G	G/G	G/G	G/G	G/G	G/A	G/G	G/G	G/G	G/G	G/G	G/G	G/G	G/G	G/G	G/G	G/G	G/G	G/G	G/G	G/G	G/G	G/G	G/G	G/G	G/G
Jcr4S19062	780	Jcr4S19062_780	-	-	-	-	-	-	-	T	C	AB=0.119021;ABP=6803.29;AC=86;AF=0.452632;AN=190;AO=668;CIGAR=1X;DP=5929;DPRA=0;EPP=1453.55;EPPR=11420.6;GTI=0;HWE=611.761;LEN=1;MEANALT=1.03158;MQM=0;MQMR=36.1153;NS=95;NUMALT=1;ODDS=0;PAIRED=0;PAIREDR=0;RO=5258;RPP=1453.55;RPPR=11420.6;RUN=1;SAP=1453.55;SRP=11420.6;TYPE=snp;XAI=0;XAM=0.0104832;XAS=0.0104832;XRI=5.98861e-06;XRM=0.000824081;XRS=0.000818092;technology.Illumina=1;BVAR;SURRSEQ=CTAAA…	INTERGENIC(MODIFIER||||||||||1)	T/T	T/T	T/T	T/T	T/T	T/T	T/T	T/T	T/T	T/T	T/T	T/T	T/T	T/T	T/T	T/T	T/T	T/T	T/T	T/T	T/T	T/T	T/T	T/T	T/T	T/T	T/T	T/T	T/T	T/T	T/T	T/T	T/T	T/T	T/T	T/T
Jcr4S13250	912	Jcr4S13250_912	-	-	-	-	-	-	-	G	C	AB=0.120069;ABP=10904.7;AC=91;AF=0.473958;AN=192;AO=1056;CIGAR=1X;DP=8930;DPRA=23.4895;EPP=2296.09;EPPR=9926.91;GTI=0;HWE=802.493;LEN=1;MEANALT=1.02105;MQM=0;MQMR=0.00215955;NS=96;NUMALT=1;ODDS=0;PAIRED=0;PAIREDR=0;RO=7872;RPP=2296.09;RPPR=9926.91;RUN=1;SAP=2296.09;SRP=17096.8;TYPE=snp;XAI=9.76257e-06;XAM=0.0102816;XAS=0.0102718;XRI=1.30961e-06;XRM=0.00242836;XRS=0.00242705;technology.Illumina=1;…	DOWNSTREAM(MODIFIER||678||54|Jcr4S13250.10|protein_coding|CODING|Jcr4S13250.10||1)	G/G	G/C	G/G	G/G	G/G	G/G	G/G	G/G	G/G	G/G	G/G	G/G	G/G	G/G	G/G	G/G	G/G	G/G	G/G	G/G	G/G	G/G	G/G	G/G	G/G	G/G	G/C	G/G	G/G	G/G	G/G	G/G	G/G	G/G	G/G	G/G
Jcr4S20681	975	Jcr4S20681_975	-	-	-	-	-	-	-	G	A	AB=0.10795;ABP=7979.94;AC=81;AF=0.421875;AN=192;AO=678;CIGAR=1X;DP=6914;DPRA=0;EPP=1475.27;EPPR=13498.7;GTI=0;HWE=407.07;LEN=1;MEANALT=1.05208;MQM=0;MQMR=36.6338;NS=96;NUMALT=1;ODDS=0;PAIRED=0;PAIREDR=0;RO=6231;RPP=1475.27;RPPR=13533.5;RUN=1;SAP=1475.27;SRP=13498.7;TYPE=snp;XAI=0.000106596;XAM=0.000724942;XAS=0.000618345;XRI=4.30518e-05;XRM=0.000729451;XRS=0.000686399;technology.Illumina=1;BVAR;S…	DOWNSTREAM(MODIFIER||455||964|Jcr4S20681.10|protein_coding|CODING|Jcr4S20681.10||1);INTERGENIC(MODIFIER||||||||||1)	G/G	G/G	G/G	G/G	G/G	G/G	G/G	G/G	G/G	G/G	G/G	G/G	G/G	G/G	G/G	G/G	G/G	G/G	G/G	G/G	G/G	G/G	G/G	G/G	G/G	G/G	G/G	G/G	G/G	G/G	G/G	G/A	G/G	G/G	G/G	G/G
Jcr4S20639	1620	Jcr4S20639_1620	-	-	-	-	-	-	-	C	T	AB=0.123063;ABP=9640.12;AC=93;AF=0.484375;AN=192;AO=969;CIGAR=1X;DP=7982;DPRA=42;EPP=2107.17;EPPR=15218.5;GTI=0;HWE=911.165;LEN=1;MEANALT=1.02105;MQM=0;MQMR=0;NS=96;NUMALT=1;ODDS=0;PAIRED=0;PAIREDR=0;RO=7011;RPP=2107.17;RPPR=15227.2;RUN=1;SAP=2107.17;SRP=15218.5;TYPE=snp;XAI=0;XAM=0.0007141;XAS=0.0007141;XRI=7.83565e-06;XRM=0.00677173;XRS=0.0067639;technology.Illumina=1;BVAR;SURRSEQ=GTGTAGTAGTTGA…	SYNONYMOUS_CODING(LOW|SILENT|tgC/tgT|C244|612|Jcr4S20639.10|protein_coding|CODING|Jcr4S20639.10|2|1)	C/C	C/C	C/C	C/C	C/C	C/C	C/C	C/C	C/C	C/C	C/C	C/C	C/T	C/C	C/C	C/C	C/C	C/C	C/C	C/C	C/C	C/C	C/C	C/C	C/C	C/C	C/C	C/C	C/T	C/C	C/C	C/C	C/C	C/C	C/C	C/C
Jcr4S02496	1665	Jcr4S02496_1665	GO:0008270;GO:0003676	-	-	zinc ion binding; nucleic acid binding	-	-	-	G	A	AB=0.134657;ABP=9697.54;AC=93;AF=0.484375;AN=192;AO=1135;CIGAR=1X;DP=8564;DPRA=90.1368;EPP=2467.63;EPPR=6161.86;GTI=0;HWE=911.165;LEN=1;MEANALT=1.84211;MQM=6.89868;MQMR=6.04849;NS=96;NUMALT=1;ODDS=0;PAIRED=0;PAIREDR=0;RO=7280;RPP=2467.63;RPPR=11284.7;RUN=1;SAP=2467.63;SRP=3479.57;TYPE=snp;XAI=9.08306e-06;XAM=0.0103065;XAS=0.0102974;XRI=0.000813006;XRM=0.0081477;XRS=0.0073347;technology.Illumina=1…	NON_SYNONYMOUS_CODING(MODERATE|MISSENSE|Cgt/Tgt|R105C|572|Jcr4S02496.10|protein_coding|CODING|Jcr4S02496.10|2|1|WARNING_TRANSCRIPT_INCOMPLETE);UPSTREAM(MODIFIER||4011||464|Jcr4S02496.20|protein_coding|CODING|Jcr4S02496.20||1)	G/G	G/G	G/G	G/G	G/G	G/G	G/G	G/G	G/G	G/G	G/G	G/A	G/G	G/G	G/G	G/G	G/G	G/G	G/G	G/G	G/G	G/G	G/G	G/G	G/G	G/G	G/G	G/G	G/G	G/G	G/G	G/G	G/G	G/G	G/G	G/G
Jcr4U32497	1716	Jcr4U32497_1716	-	-	-	-	-	-	-	C	T	AB=0.114294;ABP=8437.13;AC=77;AF=0.401042;AN=192;AO=804;CIGAR=1X;DP=7890;DPRA=41.5158;EPP=211.742;EPPR=5085.33;GTI=0;HWE=288.598;LEN=1;MEANALT=1.04211;MQM=14.0634;MQMR=26.5708;NS=96;NUMALT=1;ODDS=0;PAIRED=0;PAIREDR=0;RO=7081;RPP=1748.87;RPPR=15379.2;RUN=1;SAP=211.742;SRP=5085.33;TYPE=snp;XAI=3.47928e-05;XAM=0.0138066;XAS=0.0137718;XRI=8.31821e-06;XRM=0.01011;XRS=0.0101017;technology.Illumina=1;BV…	DOWNSTREAM(MODIFIER||1351||81|Jcr4U32497.10|protein_coding|CODING|Jcr4U32497.10||1);UPSTREAM(MODIFIER||243||181|Jcr4U32497.20|protein_coding|CODING|Jcr4U32497.20||1)	C/C	C/C	C/C	C/C	C/C	C/C	C/C	C/C	C/C	C/C	C/C	C/C	C/C	C/C	C/C	C/C	C/T	C/C	C/C	C/C	C/C	C/C	C/C	C/C	C/C	C/C	C/C	C/C	C/C	C/C	C/C	C/C	C/C	C/C	C/C	C/C
Jcr4S09785	1887	Jcr4S09785_1887	GO:0008270;GO:0003676	-	-	zinc ion binding; nucleic acid binding	-	-	-	C	T	AB=0.115954;ABP=6322.65;AC=84;AF=0.4375;AN=192;AO=602;CIGAR=1X;DP=5543;DPRA=8.32481;EPP=1310.24;EPPR=707.533;GTI=0;HWE=508.043;LEN=1;MEANALT=1.01053;MQM=0;MQMR=0;NS=96;NUMALT=1;ODDS=0;PAIRED=0;PAIREDR=0;RO=4940;RPP=1310.24;RPPR=707.533;RUN=1;SAP=1310.24;SRP=10730.1;TYPE=snp;XAI=0;XAM=0.00557625;XAS=0.00557625;XRI=4.23947e-06;XRM=0.00940378;XRS=0.00939954;technology.Illumina=1;BVAR;SURRSEQ=GTACACA…	SYNONYMOUS_CODING(LOW|SILENT|caG/caA|Q606|1204|Jcr4S09785.10|protein_coding|CODING|Jcr4S09785.10|7|1|WARNING_TRANSCRIPT_INCOMPLETE)	C/C	C/C	C/C	C/C	C/C	C/C	C/C	C/C	C/C	C/C	C/C	C/C	C/C	C/C	C/C	C/C	C/C	C/C	C/C	C/C	C/C	C/C	C/C	C/C	C/C	C/C	./.	C/C	C/C	C/C	C/C	C/C	C/C	C/C	C/C	C/C
Jcr4U30475	1902	Jcr4U30475_1902	-	-	-	-	-	-	-	A	C	AB=0.12017;ABP=5905.21;AC=77;AF=0.401042;AN=192;AO=615;CIGAR=1X;DP=5794;DPRA=3.24675;EPP=1338.47;EPPR=775.996;GTI=0;HWE=288.598;LEN=1;MEANALT=1.06452;MQM=0;MQMR=0;NS=96;NUMALT=1;ODDS=0;PAIRED=0;PAIREDR=0;RO=5173;RPP=1338.47;RPPR=2904.31;RUN=1;SAP=1338.47;SRP=6390.99;TYPE=snp;XAI=1.67631e-05;XAM=0.0103707;XAS=0.0103539;XRI=0.000465076;XRM=0.0095871;XRS=0.00912202;technology.Illumina=1;BVAR;SURRSEQ…	DOWNSTREAM(MODIFIER||233||144|Jcr4U30475.10|protein_coding|CODING|Jcr4U30475.10||1)	A/A	A/A	A/A	A/A	A/A	A/A	A/A	A/A	A/A	A/A	A/A	A/A	A/A	A/A	A/A	A/A	A/A	A/A	A/A	A/A	A/A	A/A	A/A	A/A	A/A	A/A	A/A	A/A	A/A	A/A	A/A	A/A	A/A	A/A	A/A	A/A
Jcr4S28086	1930	Jcr4S28086_1930	GO:0015074;GO:0003676	DNA integration	-	nucleic acid binding	-	-	-	C	T	AB=0.120112;ABP=4939.31;AC=75;AF=0.390625;AN=192;AO=523;CIGAR=1X;DP=5126;DPRA=13.4789;EPP=1138.69;EPPR=7.91947;GTI=0;HWE=235.213;LEN=1;MEANALT=1.01053;MQM=0.447419;MQMR=36.5876;NS=96;NUMALT=1;ODDS=0;PAIRED=0;PAIREDR=0;RO=4602;RPP=1138.69;RPPR=9961.41;RUN=1;SAP=1138.69;SRP=8.71973;TYPE=snp;XAI=0;XAM=0.0102122;XAS=0.0102122;XRI=4.48035e-06;XRM=0.000931866;XRS=0.000927386;technology.Illumina=1;BVAR;…	NON_SYNONYMOUS_CODING(MODERATE|MISSENSE|gCa/gTa|A281V|615|Jcr4S28086.10|protein_coding|CODING|Jcr4S28086.10|4|1|WARNING_TRANSCRIPT_INCOMPLETE)	C/C	C/T	C/C	C/C	C/C	C/C	C/C	C/C	C/C	C/C	C/C	C/C	C/C	C/C	C/C	C/C	C/C	C/C	C/C	C/C	C/C	C/C	C/C	C/C	C/C	C/C	C/C	C/C	C/C	C/C	C/C	C/C	C/C	C/C	C/C	C/C
Jcr4S20185	2535	Jcr4S20185_2535	-	-	-	-	-	-	-	T	C	AB=0.126626;ABP=17034.1;AC=86;AF=0.452632;AN=190;AO=1845;CIGAR=1X;DP=15285;DPRA=10.1523;EPP=12.3329;EPPR=2577.77;GTI=0;HWE=611.761;LEN=1;MEANALT=1;MQM=30.4136;MQMR=22.1548;NS=95;NUMALT=1;ODDS=0;PAIRED=0;PAIREDR=0;RO=13440;RPP=3922.99;RPPR=29187.6;RUN=1;SAP=16.9936;SRP=2577.77;TYPE=snp;XAI=5.58768e-06;XAM=0.0101703;XAS=0.0101647;XRI=3.90185e-06;XRM=0.0196828;XRS=0.0196789;technology.Illumina=1;BVA…	INTERGENIC(MODIFIER||||||||||1)	T/T	T/T	T/T	T/T	T/T	T/T	T/T	T/T	T/T	T/T	T/T	T/T	T/T	T/T	T/T	T/T	T/T	T/T	T/T	T/T	T/T	T/T	T/T	T/T	T/T	T/T	T/T	T/T	T/T	T/T	T/T	T/T	T/T	T/T	T/T	T/T
Jcr4S09535	2726	Jcr4S09535_2726	-	-	-	-	-	-	-	A	G	AB=0.892603;ABP=2446.35;AC=165;AF=0.859375;AN=192;AO=7310;CIGAR=1X;DP=7711;DPRA=0;EPP=15876.5;EPPR=856.421;GTI=0;HWE=-314.371;LEN=1;MEANALT=1.04167;MQM=17.9988;MQMR=17.9496;NS=96;NUMALT=1;ODDS=0;PAIRED=0;PAIREDR=0;RO=397;RPP=15876.5;RPPR=856.421;RUN=1;SAP=15876.5;SRP=865.085;TYPE=snp;XAI=1.2768e-05;XAM=0.0100962;XAS=0.0100834;XRI=2.5968e-05;XRM=0.000874437;XRS=0.000848469;technology.Illumina=1;BV…	UPSTREAM(MODIFIER||2066||119|Jcr4S09535.10|protein_coding|CODING|Jcr4S09535.10||1)	G/G	G/G	G/G	G/G	G/G	G/G	G/G	G/G	G/G	G/G	G/G	G/G	G/G	G/G	G/G	G/G	G/G	G/G	G/G	G/G	G/G	G/G	G/G	G/G	G/G	G/G	G/G	G/G	./.	G/G	G/G	A/G	G/G	G/G	G/G	G/G
Jcr4U31571	2894	Jcr4U31571_2894	-	-	-	-	-	-	-	T	G	AB=0.109705;ABP=3452.4;AC=66;AF=0.347368;AN=190;AO=320;CIGAR=1X;DP=3586;DPRA=1.8877;EPP=689.223;EPPR=2203.19;GTI=0;HWE=47.1091;LEN=1;MEANALT=1.04545;MQM=0.05625;MQMR=0.0220723;NS=95;NUMALT=1;ODDS=0;PAIRED=0;PAIREDR=0;RO=3262;RPP=689.223;RPPR=2222.6;RUN=1;SAP=697.881;SRP=7051.65;TYPE=snp;XAI=0;XAM=0.000543806;XAS=0.000543806;XRI=3.16042e-06;XRM=0.00412856;XRS=0.0041254;technology.Illumina=1;BVAR;S…	INTERGENIC(MODIFIER||||||||||1)	T/T	T/T	T/T	T/T	T/T	T/T	T/T	T/T	T/T	T/T	T/T	T/T	T/T	T/T	T/T	T/T	T/T	T/T	./.	T/T	T/T	./.	T/T	T/T	T/T	T/T	T/T	T/T	./.	T/T	T/T	./.	T/T	T/T	T/T	T/T
Jcr4S13275	3001	Jcr4S13275_3001	-	-	-	-	-	-	-	G	A	AB=0.857939;ABP=802.027;AC=181;AF=0.942708;AN=192;AO=8523;CIGAR=1X;DP=8760;DPRA=0;EPP=18510.5;EPPR=6.12338;GTI=0;HWE=-228.015;LEN=1;MEANALT=1.11458;MQM=36.9986;MQMR=37;NS=96;NUMALT=1;ODDS=0;PAIRED=0;PAIREDR=0;RO=226;RPP=18510.5;RPPR=493.763;RUN=1;SAP=18510.5;SRP=6.12338;TYPE=snp;XAI=1.20338e-05;XAM=0.000849126;XAS=0.000837092;XRI=0;XRM=0.00128274;XRS=0.00128274;technology.Illumina=1;BVAR;SURRSEQ=…	DOWNSTREAM(MODIFIER||1817||114|Jcr4S13275.10|protein_coding|CODING|Jcr4S13275.10||1)	A/A	A/A	A/A	A/A	A/A	A/A	A/A	A/A	A/A	A/A	A/A	A/A	A/A	A/A	A/A	A/A	A/A	A/A	A/A	A/A	A/A	A/A	A/A	A/A	A/A	A/A	A/A	A/A	G/A	A/A	A/A	G/A	A/A	A/A	A/A	A/A
Jcr4S03598	3006	Jcr4S03598_3006	-	-	-	-	-	-	-	T	C	AB=0.120635;ABP=4334.45;AC=74;AF=0.385417;AN=192;AO=455;CIGAR=1X;DP=4371;DPRA=2.31774;EPP=991.03;EPPR=8307.89;GTI=0;HWE=209.83;LEN=1;MEANALT=1;MQM=0;MQMR=0;NS=96;NUMALT=1;ODDS=0;PAIRED=0;PAIREDR=0;RO=3916;RPP=991.03;RPPR=8325.07;RUN=1;SAP=991.03;SRP=8489.13;TYPE=snp;XAI=2.26578e-05;XAM=0.000695454;XAS=0.000672797;XRI=0.00170258;XRM=0.00664192;XRS=0.00493934;technology.Illumina=1;BVAR;SURRSEQ=TTCT…	INTERGENIC(MODIFIER||||||||||1)	T/T	T/T	T/T	T/T	T/T	T/T	T/T	T/T	T/T	T/T	T/T	T/T	T/T	T/C	T/T	./.	T/T	T/T	T/T	T/T	T/T	T/T	T/T	T/T	T/T	T/T	T/T	T/T	T/T	T/T	T/T	./.	T/T	T/T	T/T	T/T
Jcr4S16797	3282	Jcr4S16797_3282	GO:0008270;GO:0003676	-	-	zinc ion binding; nucleic acid binding	-	-	-	C	A	AB=0.776224;ABP=192.551;AC=186;AF=0.96875;AN=192;AO=4822;CIGAR=1X;DP=4935;DPRA=0;EPP=10473.9;EPPR=214.36;GTI=0;HWE=-158.184;LEN=1;MEANALT=1.04167;MQM=0;MQMR=0;NS=96;NUMALT=1;ODDS=0;PAIRED=0;PAIREDR=0;RO=109;RPP=10473.9;RPPR=214.36;RUN=1;SAP=10473.9;SRP=239.701;TYPE=snp;XAI=0;XAM=0.000751992;XAS=0.000751992;XRI=0;XRM=0.00154311;XRS=0.00154311;technology.Illumina=1;BVAR;SURRSEQ=CCGGGCTCCACGCATTCATA…	NON_SYNONYMOUS_CODING(MODERATE|MISSENSE|cCt/cAt|P465H|1077|Jcr4S16797.10|protein_coding|CODING|Jcr4S16797.10|1|1)	A/A	A/A	A/A	A/A	A/A	A/A	A/A	A/A	A/A	A/A	A/A	A/A	A/A	A/A	A/A	A/A	A/A	A/A	A/A	A/A	A/A	A/A	A/A	A/A	A/A	A/A	A/A	A/A	C/A	A/A	A/A	C/A	A/A	A/A	A/A	A/A
Jcr4S15588	3518	Jcr4S15588_3518	-	-	-	-	-	-	-	G	A	AB=0.821366;ABP=515.223;AC=179;AF=0.942105;AN=190;AO=4570;CIGAR=1X;DP=4717;DPRA=0;EPP=14.8721;EPPR=15.6048;GTI=0;HWE=-226.923;LEN=1;MEANALT=1.01053;MQM=36.9733;MQMR=29.3724;NS=95;NUMALT=1;ODDS=0;PAIRED=0;PAIREDR=0;RO=145;RPP=9874.59;RPPR=317.874;RUN=1;SAP=16.7424;SRP=15.6048;TYPE=snp;XAI=4.51172e-06;XAM=0.0105721;XAS=0.0105676;XRI=0;XRM=0.00625006;XRS=0.00625006;technology.Illumina=1;BVAR;SURRSEQ…	DOWNSTREAM(MODIFIER||1943||300|Jcr4S15588.10|protein_coding|CODING|Jcr4S15588.10||1)	A/A	A/A	A/A	A/A	A/A	A/A	A/A	A/A	A/A	A/A	A/A	A/A	A/A	A/A	A/A	A/A	A/A	A/A	A/A	A/A	A/A	A/A	A/A	A/A	A/A	A/A	A/A	A/A	G/A	A/A	A/A	G/A	A/A	A/A	A/A	A/A
Jcr4S15588	3521	Jcr4S15588_3521	-	-	-	-	-	-	-	C	G	AB=0.821678;ABP=517.118;AC=179;AF=0.942105;AN=190;AO=4599;CIGAR=1X;DP=4745;DPRA=0;EPP=4.54435;EPPR=17.6032;GTI=0;HWE=-226.923;LEN=1;MEANALT=1.02105;MQM=36.9735;MQMR=29.2657;NS=95;NUMALT=1;ODDS=0;PAIRED=0;PAIREDR=0;RO=143;RPP=9585.55;RPPR=313.531;RUN=1;SAP=13.7761;SRP=17.6032;TYPE=snp;XAI=4.48327e-06;XAM=0.010557;XAS=0.0105525;XRI=0;XRM=0.00626612;XRS=0.00626612;technology.Illumina=1;BVAR;SURRSEQ=…	DOWNSTREAM(MODIFIER||1946||300|Jcr4S15588.10|protein_coding|CODING|Jcr4S15588.10||1)	G/G	G/G	G/G	G/G	G/G	G/G	G/G	G/G	G/G	G/G	G/G	G/G	G/G	G/G	G/G	G/G	G/G	G/G	G/G	G/G	G/G	G/G	G/G	G/G	G/G	G/G	G/G	G/G	C/G	G/G	G/G	C/G	G/G	G/G	G/G	G/G
Jcr4S26598	4075	Jcr4S26598_4075	-	-	-	-	-	-	-	G	A	AB=0.113055;ABP=5950.23;AC=78;AF=0.40625;AN=192;AO=564;CIGAR=1X;DP=5580;DPRA=0;EPP=3.39531;EPPR=17.0366;GTI=0;HWE=317.324;LEN=1;MEANALT=1;MQM=0;MQMR=0;NS=96;NUMALT=1;ODDS=0;PAIRED=0;PAIREDR=0;RO=5016;RPP=1227.72;RPPR=10354.8;RUN=1;SAP=3.39531;SRP=6.51686;TYPE=snp;XAI=0;XAM=0.00998747;XAS=0.00998747;XRI=1.07447e-05;XRM=0.00361889;XRS=0.00360814;technology.Illumina=1;BVAR;SURRSEQ=GCACGGGCGTGCTACATG…	DOWNSTREAM(MODIFIER||2688||189|Jcr4S26598.10|protein_coding|CODING|Jcr4S26598.10||1);NON_SYNONYMOUS_CODING(MODERATE|MISSENSE|cGt/cAt|R6H|80|Jcr4S26598.20|protein_coding|CODING|Jcr4S26598.20|1|1)	G/G	G/A	G/G	G/G	G/G	G/G	G/G	G/G	G/G	./.	G/G	G/G	G/G	G/G	G/G	G/G	G/G	G/G	G/G	G/G	G/G	G/G	G/G	G/G	G/G	G/G	G/G	G/G	G/G	G/G	G/A	G/G	G/G	G/G	G/G	G/G
Jcr4U28948	4539	Jcr4U28948_4539	-	-	-	-	-	-	-	G	C	AB=0.126877;ABP=7170.27;AC=86;AF=0.447917;AN=192;AO=778;CIGAR=1X;DP=6453;DPRA=5.47064;EPP=1692.42;EPPR=636.182;GTI=0;HWE=582.426;LEN=1;MEANALT=2.28723;MQM=0;MQMR=14.1708;NS=96;NUMALT=1;ODDS=0;PAIRED=0;PAIREDR=0;RO=5462;RPP=1692.42;RPPR=11854.9;RUN=1;SAP=1692.42;SRP=634.176;TYPE=snp;XAI=0;XAM=0.00287236;XAS=0.00287236;XRI=1.32318e-05;XRM=0.00354023;XRS=0.00352699;technology.Illumina=1;BVAR;SURRSEQ…	INTERGENIC(MODIFIER||||||||||1)	G/G	G/G	G/G	G/G	G/G	G/G	G/G	G/G	G/G	G/C	G/G	G/G	G/G	G/G	G/C	G/G	G/G	G/G	G/G	G/G	G/G	G/G	G/G	./.	G/G	G/G	G/G	G/G	G/G	G/G	G/G	G/G	G/G	G/G	G/G	G/G
Jcr4S06837	4660	Jcr4S06837_4660	-	-	-	-	-	-	-	C	G	AB=0.115269;ABP=8557.84;AC=85;AF=0.442708;AN=192;AO=806;CIGAR=1X;DP=7411;DPRA=4.24037;EPP=1753.22;EPPR=37.3097;GTI=0;HWE=544.451;LEN=1;MEANALT=1;MQM=0.162531;MQMR=22.0798;NS=96;NUMALT=1;ODDS=0;PAIRED=0;PAIREDR=0;RO=6605;RPP=1753.22;RPPR=14319.5;RUN=1;SAP=1753.22;SRP=38.5958;TYPE=snp;XAI=0;XAM=0.0102574;XAS=0.0102574;XRI=9.43211e-06;XRM=0.00124397;XRS=0.00123453;technology.Illumina=1;BVAR;SURRSEQ=…	DOWNSTREAM(MODIFIER||4958||124|Jcr4S06837.20|protein_coding|CODING|Jcr4S06837.20||1);INTERGENIC(MODIFIER||||||||||1);UPSTREAM(MODIFIER||2611||120|Jcr4S06837.10|protein_coding|CODING|Jcr4S06837.10||1)	C/C	C/C	C/C	C/C	C/C	C/C	C/C	C/C	C/C	./.	C/C	C/C	C/C	C/C	C/C	C/C	C/C	C/C	C/C	C/C	C/C	C/C	C/C	C/C	C/C	C/C	C/C	C/C	C/C	C/C	C/C	./.	C/C	C/C	C/C	C/C
Jcr4S10906	4719	Jcr4S10906_4719	-	-	-	-	-	-	-	G	T	AB=0.798611;ABP=226.069;AC=187;AF=0.973958;AN=192;AO=4894;CIGAR=1X;DP=5000;DPRA=0;EPP=10630.2;EPPR=224.5;GTI=0;HWE=-140.115;LEN=1;MEANALT=1.04167;MQM=0;MQMR=0;NS=96;NUMALT=1;ODDS=0;PAIRED=0;PAIREDR=0;RO=102;RPP=10630.2;RPPR=224.5;RUN=1;SAP=10630.2;SRP=224.5;TYPE=snp;XAI=4.6715e-06;XAM=0.000748927;XAS=0.000744256;XRI=0;XRM=0.00231229;XRS=0.00231229;technology.Illumina=1;BVAR;SURRSEQ=ATCAGCATGCATAC…	DOWNSTREAM(MODIFIER||3681||360|Jcr4S10906.20|protein_coding|CODING|Jcr4S10906.20||1);SYNONYMOUS_CODING(LOW|SILENT|ccC/ccA|P496|1593|Jcr4S10906.10|protein_coding|CODING|Jcr4S10906.10|1|1|WARNING_TRANSCRIPT_INCOMPLETE)	T/T	T/T	T/T	T/T	T/T	T/T	T/T	T/T	T/T	T/T	T/T	T/T	T/T	T/T	T/T	T/T	T/T	T/T	T/T	T/T	T/T	T/T	T/T	T/T	T/T	T/T	T/T	T/T	G/T	T/T	T/T	G/T	T/T	T/T	T/T	T/T
Jcr4S04794	4790	Jcr4S04794_4790	-	-	-	-	-	-	-	C	T	AB=0.116013;ABP=5257.73;AC=84;AF=0.442105;AN=190;AO=493;CIGAR=1X;DP=4573;DPRA=1.64289;EPP=1073.55;EPPR=1523.84;GTI=0;HWE=534.46;LEN=1;MEANALT=1.02174;MQM=19.9675;MQMR=18.1484;NS=95;NUMALT=1;ODDS=0;PAIRED=0;PAIREDR=0;RO=4078;RPP=1073.55;RPPR=1520.24;RUN=1;SAP=1073.55;SRP=8849.59;TYPE=snp;XAI=0;XAM=0.0102891;XAS=0.0102891;XRI=1.01121e-05;XRM=0.00824036;XRS=0.00823025;technology.Illumina=1;BVAR;SURR…	DOWNSTREAM(MODIFIER||25||1219|Jcr4S04794.20|protein_coding|CODING|Jcr4S04794.20||1);INTERGENIC(MODIFIER||||||||||1);UPSTREAM(MODIFIER||3047||262|Jcr4S04794.10|protein_coding|CODING|Jcr4S04794.10||1)	C/C	C/C	C/C	C/C	C/C	C/C	C/C	C/C	C/C	./.	C/C	C/C	C/C	C/C	C/C	C/C	C/C	C/C	C/C	C/C	C/C	C/C	C/C	C/C	C/C	C/C	C/C	C/C	C/C	C/C	C/C	C/C	C/C	C/C	C/C	C/C
Jcr4S05102	5243	Jcr4S05102_5243	-	-	-	-	-	-	-	G	T	AB=0.109299;ABP=3011.42;AC=58;AF=0.305263;AN=190;AO=297;CIGAR=1X;DP=3721;DPRA=1.32622;EPP=622.143;EPPR=124.747;GTI=0;HWE=-90.4015;LEN=1;MEANALT=1.02247;MQM=21.431;MQMR=36.4985;NS=95;NUMALT=1;ODDS=0;PAIRED=0;PAIREDR=0;RO=3422;RPP=639.281;RPPR=7022.71;RUN=1;SAP=630.683;SRP=122.534;TYPE=snp;XAI=0;XAM=0.0107153;XAS=0.0107153;XRI=3.01265e-06;XRM=0.00112316;XRS=0.00112015;technology.Illumina=1;BVAR;SUR…	DOWNSTREAM(MODIFIER||3905||1619|Jcr4S05102.30|protein_coding|CODING|Jcr4S05102.30||1);NON_SYNONYMOUS_CODING(MODERATE|MISSENSE|Ggc/Tgc|G39C|74|Jcr4S05102.20|protein_coding|CODING|Jcr4S05102.20|1|1);UPSTREAM(MODIFIER||1761||520|Jcr4S05102.10|protein_coding|CODING|Jcr4S05102.10||1)	G/G	G/G	./.	G/G	G/G	./.	G/G	G/G	G/G	G/G	G/G	G/G	G/G	G/G	G/G	G/G	G/G	G/G	G/G	G/G	G/G	G/G	G/G	G/G	G/G	G/G	G/G	G/G	G/T	G/G	G/G	G/T	G/G	G/G	G/G	G/G
Jcr4S05102	5300	Jcr4S05102_5300	-	-	-	-	-	-	-	G	C	AB=0.115509;ABP=1592.68;AC=33;AF=0.173684;AN=190;AO=223;CIGAR=1X;DP=3625;DPRA=1.32967;EPP=461.542;EPPR=27.531;GTI=0;HWE=-304.895;LEN=1;MEANALT=1;MQM=16.139;MQMR=36.9918;NS=95;NUMALT=1;ODDS=0;PAIRED=0;PAIREDR=0;RO=3402;RPP=487.249;RPPR=7390.36;RUN=1;SAP=461.542;SRP=27.531;TYPE=snp;XAI=0;XAM=0.0132257;XAS=0.0132257;XRI=7.35307e-06;XRM=0.000804305;XRS=0.000796952;technology.Illumina=1;BVAR;SURRSEQ=C…	DOWNSTREAM(MODIFIER||3848||1619|Jcr4S05102.30|protein_coding|CODING|Jcr4S05102.30||1);NON_SYNONYMOUS_CODING(MODERATE|MISSENSE|Gtg/Ctg|V58L|74|Jcr4S05102.20|protein_coding|CODING|Jcr4S05102.20|1|1);UPSTREAM(MODIFIER||1818||520|Jcr4S05102.10|protein_coding|CODING|Jcr4S05102.10||1)	G/G	G/G	./.	G/G	G/G	./.	G/G	G/G	G/G	G/G	G/G	G/G	G/G	G/G	G/G	G/G	G/G	G/G	G/G	G/G	G/G	G/G	G/G	G/G	G/G	G/G	G/G	G/G	G/C	G/G	G/G	./.	G/G	G/G	G/G	G/G
Jcr4S07781	5829	Jcr4S07781_5829	-	-	-	-	-	-	-	G	A	AB=0.133333;ABP=8866.38;AC=88;AF=0.463158;AN=190;AO=1035;CIGAR=1X;DP=8081;DPRA=0;EPP=2250.48;EPPR=14584.3;GTI=0;HWE=696.702;LEN=1;MEANALT=1.03158;MQM=0;MQMR=0;NS=95;NUMALT=1;ODDS=0;PAIRED=0;PAIREDR=0;RO=7043;RPP=2250.48;RPPR=14609.7;RUN=1;SAP=2250.48;SRP=15270.6;TYPE=snp;XAI=0;XAM=0.00058804;XAS=0.00058804;XRI=9.07107e-06;XRM=0.00701085;XRS=0.00700177;technology.Illumina=1;BVAR;SURRSEQ=CCGGAAATAC…	SYNONYMOUS_CODING(LOW|SILENT|tgC/tgT|C339|471|Jcr4S07781.30|protein_coding|CODING|Jcr4S07781.30|3|1|WARNING_TRANSCRIPT_NO_START_CODON);UPSTREAM(MODIFIER||2054||488|Jcr4S07781.20|protein_coding|CODING|Jcr4S07781.20||1);UPSTREAM(MODIFIER||3145||146|Jcr4S07781.10|protein_coding|CODING|Jcr4S07781.10||1)	G/G	G/G	G/G	G/G	G/G	G/G	G/G	G/G	G/G	G/A	G/G	G/G	G/G	G/G	G/G	G/G	G/G	G/A	G/G	G/G	G/G	G/G	G/G	G/G	G/G	G/G	G/G	G/G	G/G	G/G	G/G	G/G	G/A	G/G	G/G	G/G
Jcr4S06738	6356	Jcr4S06738_6356	-	-	-	-	-	-	-	T	C	AB=0.129937;ABP=8946.86;AC=93;AF=0.484375;AN=192;AO=985;CIGAR=1X;DP=7665;DPRA=20.1605;EPP=2133.23;EPPR=14488.9;GTI=0;HWE=911.165;LEN=1;MEANALT=1.01053;MQM=0;MQMR=0;NS=96;NUMALT=1;ODDS=0;PAIRED=0;PAIREDR=0;RO=6679;RPP=2133.23;RPPR=14488.9;RUN=1;SAP=2141.91;SRP=14506.3;TYPE=snp;XAI=0;XAM=0.000706451;XAS=0.000706451;XRI=0.000924871;XRM=0.00953193;XRS=0.00860706;technology.Illumina=1;BVAR;SURRSEQ=GCA…	DOWNSTREAM(MODIFIER||1316||166|Jcr4S06738.20|protein_coding|CODING|Jcr4S06738.20||1);DOWNSTREAM(MODIFIER||4233||204|Jcr4S06738.40|protein_coding|CODING|Jcr4S06738.40||1);INTERGENIC(MODIFIER||||||||||1);UPSTREAM(MODIFIER||1963||227|Jcr4S06738.30|protein_coding|CODING|Jcr4S06738.30||1)	T/T	T/T	./.	T/T	T/T	T/T	T/T	T/T	T/T	T/T	T/T	T/T	T/T	T/T	T/T	T/T	T/T	T/T	T/T	T/T	T/T	T/T	T/T	T/T	T/T	T/T	T/T	T/T	T/T	T/T	T/T	T/T	T/T	T/T	T/T	T/T
Jcr4S15953	6470	Jcr4S15953_6470	-	-	-	-	-	-	-	T	C	AB=0.11687;ABP=11785.2;AC=89;AF=0.463542;AN=192;AO=1118;CIGAR=1X;DP=9908;DPRA=52.1368;EPP=2378.88;EPPR=2469.84;GTI=0;HWE=707.426;LEN=1;MEANALT=1;MQM=0.135957;MQMR=20.8795;NS=96;NUMALT=1;ODDS=0;PAIRED=0;PAIREDR=0;RO=8790;RPP=2430.72;RPPR=18994.8;RUN=1;SAP=2378.88;SRP=2435.61;TYPE=snp;XAI=1.85384e-05;XAM=0.0103485;XAS=0.01033;XRI=1.35494e-05;XRM=0.0067577;XRS=0.00674415;technology.Illumina=1;BVAR;S…	UPSTREAM(MODIFIER||3667||337|Jcr4S15953.10|protein_coding|CODING|Jcr4S15953.10||1)	T/T	T/T	T/T	T/T	T/T	T/T	T/T	T/T	T/T	T/T	T/T	T/T	T/T	T/T	T/T	T/T	T/T	T/T	T/T	T/T	T/T	T/T	T/T	T/T	T/T	T/T	T/T	T/T	T/T	T/T	T/T	T/C	T/T	T/T	T/T	T/T
Jcr4S09788	6580	Jcr4S09788_6580	-	-	-	-	-	-	-	A	G	AB=0.130139;ABP=4887.73;AC=87;AF=0.453125;AN=192;AO=550;CIGAR=1X;DP=4437;DPRA=15.5579;EPP=1197.32;EPPR=1321.37;GTI=0;HWE=622.118;LEN=1;MEANALT=1.01053;MQM=0;MQMR=0;NS=96;NUMALT=1;ODDS=0;PAIRED=0;PAIREDR=0;RO=3886;RPP=1197.32;RPPR=1321.37;RUN=1;SAP=1197.32;SRP=8441.35;TYPE=snp;XAI=0;XAM=0.00960632;XAS=0.00960632;XRI=2.82785e-06;XRM=0.00762761;XRS=0.00762478;technology.Illumina=1;BVAR;SURRSEQ=GAAGA…	DOWNSTREAM(MODIFIER||1325||159|Jcr4S09788.20|protein_coding|CODING|Jcr4S09788.20||1);INTERGENIC(MODIFIER||||||||||1);UPSTREAM(MODIFIER||1534||1433|Jcr4S09788.10|protein_coding|CODING|Jcr4S09788.10||1)	A/A	A/A	A/A	A/A	A/G	A/A	A/A	A/A	A/A	A/A	A/A	A/A	A/A	A/A	A/A	A/A	A/A	A/A	A/A	A/A	A/A	A/A	A/A	A/A	A/A	A/A	A/A	A/A	A/A	A/A	A/A	A/A	A/A	A/A	A/A	A/A
Jcr4U29116	6646	Jcr4U29116_6646	GO:0015074;GO:0003676	DNA integration	-	nucleic acid binding	-	-	-	G	A	AB=0.111217;ABP=2765.34;AC=56;AF=0.291667;AN=192;AO=276;CIGAR=1X;DP=3375;DPRA=1.23545;EPP=602.337;EPPR=6202.48;GTI=0;HWE=-128.311;LEN=1;MEANALT=1.01124;MQM=0;MQMR=0;NS=96;NUMALT=1;ODDS=0;PAIRED=0;PAIREDR=0;RO=3098;RPP=602.337;RPPR=6244.25;RUN=1;SAP=602.337;SRP=6686.87;TYPE=snp;XAI=0;XAM=0.000444418;XAS=0.000444418;XRI=2.13855e-05;XRM=0.00887703;XRS=0.00885565;technology.Illumina=1;BVAR;SURRSEQ=CA…	SYNONYMOUS_CODING(LOW|SILENT|acG/acA|T379|1090|Jcr4U29116.30|protein_coding|CODING|Jcr4U29116.30|2|1);UPSTREAM(MODIFIER||3381||50|Jcr4U29116.20|protein_coding|CODING|Jcr4U29116.20||1)	G/G	G/G	./.	G/G	G/G	G/G	G/G	G/G	G/G	G/G	G/G	G/G	G/G	G/G	G/G	G/G	G/G	./.	G/G	G/G	G/G	G/G	G/G	G/G	G/G	G/G	G/G	G/G	G/G	G/G	G/G	./.	G/G	G/G	G/G	G/G
Jcr4S08210	7839	Jcr4S08210_7839	-	-	-	-	-	-	-	TTG	T	AB=0.107577;ABP=4839.73;AC=77;AF=0.405263;AN=190;AO=421;CIGAR=1M2D;DP=4422;DPRA=2.63768;EPP=917.2;EPPR=15.97;GTI=0;HWE=307.99;LEN=2;MEANALT=2.76087;MQM=37;MQMR=36.9968;NS=95;NUMALT=1;ODDS=0;PAIRED=0;PAIREDR=0;RO=3770;RPP=917.2;RPPR=8189.46;RUN=1;SAP=917.2;SRP=15.97;TYPE=del;XAI=0.0110266;XAM=0.0119801;XAS=0.000953515;XRI=0.00502338;XRM=0.00602153;XRS=0.000998144;technology.Illumina=1;BVAR;SURRSEQ…	INTERGENIC(MODIFIER||||||||||1);UPSTREAM(MODIFIER||414||325|Jcr4S08210.20|protein_coding|CODING|Jcr4S08210.20||1)	TTG/TTG	TTG/TTG	TTG/TTG	TTG/TTG	TTG/TTG	TTG/TTG	TTG/TTG	TTG/TTG	TTG/TTG	TTG/TTG	TTG/TTG	TTG/TTG	TTG/TTG	TTG/TTG	TTG/TTG	TTG/TTG	TTG/TTG	./.	./.	TTG/TTG	TTG/TTG	TTG/TTG	TTG/TTG	TTG/TTG	TTG/TTG	TTG/TTG	TTG/TTG	TTG/TTG	./.	TTG/TTG	TTG/TTG	TTG/TTG	TTG/TTG	TTG/TTG	TTG/TTG	TTG/TTG
Jcr4S06311	8183	Jcr4S06311_8183	-	-	-	-	-	-	-	A	G	AB=0.126588;ABP=12488.5;AC=95;AF=0.494792;AN=192;AO=1307;CIGAR=1X;DP=10357;DPRA=0;EPP=2841.12;EPPR=18998.1;GTI=0;HWE=1042.78;LEN=1;MEANALT=1.01042;MQM=36.759;MQMR=36.7743;NS=96;NUMALT=1;ODDS=0;PAIRED=0;PAIREDR=0;RO=9049;RPP=2841.12;RPPR=19015.2;RUN=1;SAP=2841.12;SRP=19635.3;TYPE=snp;XAI=7.88774e-06;XAM=0.000728945;XAS=0.000721057;XRI=0.00167089;XRM=0.00572355;XRS=0.00405266;technology.Illumina=1;…	DOWNSTREAM(MODIFIER||3000||66|Jcr4S06311.40|protein_coding|CODING|Jcr4S06311.40||1);DOWNSTREAM(MODIFIER||4992||1027|Jcr4S06311.10|protein_coding|CODING|Jcr4S06311.10||1);INTERGENIC(MODIFIER||||||||||1);UPSTREAM(MODIFIER||23||352|Jcr4S06311.30|protein_coding|CODING|Jcr4S06311.30||1);UPSTREAM(MODIFIER||2525||405|Jcr4S06311.20|protein_coding|CODING|Jcr4S06311.20||1)	A/A	A/A	A/A	A/A	A/A	A/A	A/A	A/A	A/A	A/A	A/A	A/A	A/A	A/A	A/A	A/A	A/A	A/A	A/A	A/A	A/A	A/A	A/A	A/A	A/A	A/A	A/G	A/A	A/A	A/A	A/A	A/A	A/A	A/A	A/A	A/A
Jcr4S04520	8757	Jcr4S04520_8757	GO:0015074;GO:0008270;GO:0003676	DNA integration	-	nucleic acid binding; zinc ion binding	-	-	-	G	A	AB=0.117632;ABP=9740.79;AC=84;AF=0.4375;AN=192;AO=958;CIGAR=1X;DP=8668;DPRA=30.4035;EPP=2083.28;EPPR=16736.4;GTI=0;HWE=508.043;LEN=1;MEANALT=1.04211;MQM=1.37891;MQMR=22.8606;NS=96;NUMALT=1;ODDS=0;PAIRED=0;PAIREDR=0;RO=7706;RPP=2083.28;RPPR=16736.4;RUN=1;SAP=2083.28;SRP=16736.4;TYPE=snp;XAI=0.000107837;XAM=0.00986603;XAS=0.00975819;XRI=4.42318e-05;XRM=0.000725948;XRS=0.000681716;technology.Illumin…	DOWNSTREAM(MODIFIER||4124||113|Jcr4S04520.20|protein_coding|CODING|Jcr4S04520.20||1);SYNONYMOUS_CODING(LOW|SILENT|ctG/ctA|L35|1726|Jcr4S04520.40|protein_coding|CODING|Jcr4S04520.40|1|1);UPSTREAM(MODIFIER||1804||151|Jcr4S04520.30|protein_coding|CODING|Jcr4S04520.30||1)	G/G	G/G	G/G	G/G	G/G	G/G	G/G	G/G	G/G	G/G	G/G	G/G	G/G	G/G	G/A	G/G	G/G	G/G	G/A	G/G	G/G	G/G	G/G	G/G	G/G	G/G	G/G	G/G	G/G	G/G	G/G	G/G	G/G	G/G	G/G	G/G
Jcr4S08072	11573	Jcr4S08072_11573	-	-	-	-	-	-	-	C	T	AB=0.114378;ABP=8788.67;AC=89;AF=0.468421;AN=190;AO=802;CIGAR=1X;DP=7278;DPRA=0;EPP=1744.53;EPPR=14045.9;GTI=0;HWE=742.653;LEN=1;MEANALT=1.01053;MQM=10.9589;MQMR=10.7756;NS=95;NUMALT=1;ODDS=0;PAIRED=0;PAIREDR=0;RO=6475;RPP=1744.53;RPPR=14063.3;RUN=1;SAP=1744.53;SRP=14045.9;TYPE=snp;XAI=0;XAM=0.0103117;XAS=0.0103117;XRI=7.96083e-06;XRM=0.00687852;XRS=0.00687056;technology.Illumina=1;BVAR;SURRSEQ=G…	DOWNSTREAM(MODIFIER||1292||62|Jcr4S08072.30|protein_coding|CODING|Jcr4S08072.30||1);DOWNSTREAM(MODIFIER||1417||1516|Jcr4S08072.10|protein_coding|CODING|Jcr4S08072.10||1);DOWNSTREAM(MODIFIER||233||162|Jcr4S08072.20|protein_coding|CODING|Jcr4S08072.20||1);INTERGENIC(MODIFIER||||||||||1)	C/C	C/C	C/C	C/C	C/C	C/C	C/C	C/C	C/C	C/C	C/C	C/C	C/C	C/C	C/C	C/C	C/C	C/C	C/T	C/T	C/C	C/C	C/C	C/C	C/T	C/C	C/C	C/C	C/C	C/C	C/C	C/C	C/C	C/C	C/C	C/C
Jcr4S09695	14550	Jcr4S09695_14550	-	-	-	-	-	-	-	G	T	AB=0.104042;ABP=3877.32;AC=68;AF=0.354167;AN=192;AO=339;CIGAR=1X;DP=3920;DPRA=1.3026;EPP=739.139;EPPR=7703.21;GTI=0;HWE=73.8479;LEN=1;MEANALT=1.02128;MQM=0;MQMR=0;NS=96;NUMALT=1;ODDS=0;PAIRED=0;PAIREDR=0;RO=3578;RPP=739.139;RPPR=7711.86;RUN=1;SAP=739.139;SRP=7763.86;TYPE=snp;XAI=0;XAM=0.0104811;XAS=0.0104811;XRI=1.86169e-05;XRM=0.00598141;XRS=0.00596279;technology.Illumina=1;BVAR;SURRSEQ=ACTGATGT…	INTRON(MODIFIER||||1985|Jcr4S09695.30|protein_coding|CODING|Jcr4S09695.30|1|1)	G/G	G/G	G/G	G/G	G/G	G/G	G/G	G/G	G/G	G/G	G/G	G/G	G/G	G/G	G/G	G/G	G/G	G/G	G/G	G/G	G/G	G/G	G/G	G/G	G/G	G/G	G/G	G/G	G/G	G/T	G/G	G/G	G/G	G/G	G/G	G/G
Jcr4S09273	15577	Jcr4S09273_15577	-	-	-	-	-	-	-	C	G	AB=0.120383;ABP=4442.84;AC=73;AF=0.380208;AN=192;AO=469;CIGAR=1X;DP=4562;DPRA=2.85326;EPP=1021.43;EPPR=8709.38;GTI=0;HWE=185.271;LEN=1;MEANALT=1;MQM=0;MQMR=0;NS=96;NUMALT=1;ODDS=0;PAIRED=0;PAIREDR=0;RO=4093;RPP=1021.43;RPPR=8709.38;RUN=1;SAP=1021.43;SRP=8890.85;TYPE=snp;XAI=0;XAM=0.0103097;XAS=0.0103097;XRI=5.03752e-06;XRM=0.00901468;XRS=0.00900964;technology.Illumina=1;BVAR;SURRSEQ=CGTCACGCGGGTG…	UPSTREAM(MODIFIER||2494||147|Jcr4S09273.30|protein_coding|CODING|Jcr4S09273.30||1)	C/C	C/C	C/C	C/C	C/C	C/C	C/C	C/C	C/C	C/C	C/C	C/C	C/C	C/C	C/C	C/C	C/C	C/C	C/C	C/C	C/C	C/C	C/C	C/C	C/C	C/C	C/C	C/C	C/C	C/C	C/C	C/C	C/C	C/C	C/C	C/C
Jcr4S03013	16396	Jcr4S03013_16396	-	-	-	-	-	-	-	G	T	AB=0.1062;ABP=4848.16;AC=74;AF=0.385417;AN=192;AO=417;CIGAR=1X;DP=4562;DPRA=1.4941;EPP=908.514;EPPR=10.1817;GTI=0;HWE=209.83;LEN=1;MEANALT=1;MQM=0.0551559;MQMR=11.0138;NS=96;NUMALT=1;ODDS=0;PAIRED=0;PAIREDR=0;RO=4145;RPP=899.849;RPPR=8753.63;RUN=1;SAP=899.849;SRP=19.054;TYPE=snp;XAI=0;XAM=0.000612952;XAS=0.000612952;XRI=7.46148e-06;XRM=0.00255776;XRS=0.0025503;technology.Illumina=1;BVAR;SURRSEQ=A…	INTERGENIC(MODIFIER||||||||||1)	G/G	G/G	G/G	G/G	G/G	G/G	G/G	G/G	G/G	G/G	G/G	G/G	G/G	G/G	G/G	G/G	G/G	G/G	G/G	G/G	G/G	G/G	G/G	G/G	G/G	G/G	./.	G/G	./.	G/G	G/G	G/G	G/G	G/G	G/G	G/G
Jcr4S04382	22326	Jcr4S04382_22326	-	-	-	-	-	-	-	C	G	AB=0.114597;ABP=5800.99;AC=77;AF=0.401042;AN=192;AO=570;CIGAR=1X;DP=5626;DPRA=0;EPP=3.14745;EPPR=26.9403;GTI=0;HWE=277.235;LEN=1;MEANALT=1.02083;MQM=0;MQMR=0.0712307;NS=96;NUMALT=1;ODDS=0;PAIRED=0;PAIREDR=0;RO=5054;RPP=1240.75;RPPR=10873.6;RUN=1;SAP=3.14745;SRP=24.5686;TYPE=snp;XAI=0;XAM=0.0104165;XAS=0.0104165;XRI=1.29685e-05;XRM=0.00365667;XRS=0.0036437;technology.Illumina=1;BVAR;SURRSEQ=CGTGCC…	DOWNSTREAM(MODIFIER||2008||418|Jcr4S04382.30|protein_coding|CODING|Jcr4S04382.30||1)	C/C	C/C	C/C	C/C	C/G	C/C	C/C	C/C	C/G	C/C	C/G	C/C	C/C	C/C	C/C	C/C	C/C	C/C	C/C	C/C	C/C	C/C	C/C	C/C	C/C	C/C	C/C	C/C	C/C	C/C	C/C	C/C	C/C	C/C	C/C	C/C
Jcr4S04382	22371	Jcr4S04382_22371	-	-	-	-	-	-	-	C	T	AB=0.117188;ABP=6031.36;AC=82;AF=0.427083;AN=192;AO=594;CIGAR=1X;DP=5544;DPRA=0;EPP=4.19474;EPPR=3.93855;GTI=0;HWE=492.596;LEN=1;MEANALT=1;MQM=0;MQMR=0;NS=96;NUMALT=1;ODDS=0;PAIRED=0;PAIREDR=0;RO=4950;RPP=1292.86;RPPR=10751.8;RUN=1;SAP=4.19474;SRP=3.93855;TYPE=snp;XAI=0;XAM=0.0100954;XAS=0.0100954;XRI=1.04351e-05;XRM=0.00361724;XRS=0.00360681;technology.Illumina=1;BVAR;SURRSEQ=GCTTCACTAGCCAGACCTC…	DOWNSTREAM(MODIFIER||2053||418|Jcr4S04382.30|protein_coding|CODING|Jcr4S04382.30||1)	C/C	C/C	C/C	C/C	C/T	C/C	C/C	C/C	C/T	C/C	C/T	C/C	C/C	C/C	C/C	C/C	C/C	C/C	C/C	C/C	C/C	C/C	C/C	C/C	C/C	C/C	C/C	C/C	C/C	C/C	C/C	C/C	C/C	C/C	C/C	C/C
Jcr4S01986	26636	Jcr4S01986_26636	GO:0008565;GO:0005794;GO:0016192;GO:0006886;GO:0005488;GO:0030131	vesicle-mediated transport; intracellular protein transport	clathrin adaptor complex; Golgi apparatus	protein transporter activity; binding	-	-	-	C	A	AB=0.117467;ABP=6224.66;AC=84;AF=0.4375;AN=192;AO=604;CIGAR=1X;DP=5476;DPRA=57.6316;EPP=1305.91;EPPR=9605.27;GTI=0;HWE=508.043;LEN=1;MEANALT=2.57895;MQM=37;MQMR=37;NS=96;NUMALT=1;ODDS=0;PAIRED=0;PAIREDR=0;RO=4430;RPP=1305.91;RPPR=9622.63;RUN=1;SAP=1314.58;SRP=9605.27;TYPE=snp;XAI=0;XAM=0.0086823;XAS=0.0086823;XRI=4.67854e-06;XRM=0.000717801;XRS=0.000713123;technology.Illumina=1;BVAR;SURRSEQ=ATGAT…	NON_SYNONYMOUS_CODING(MODERATE|MISSENSE|gCt/gAt|A33D|886|Jcr4S01986.40|protein_coding|CODING|Jcr4S01986.40|2|1)	C/C	C/C	C/C	C/C	C/C	C/C	C/C	C/C	C/C	C/C	C/C	C/C	C/C	C/C	C/C	C/C	C/C	./.	C/C	C/C	C/C	C/C	C/C	C/C	C/C	C/C	C/C	C/C	C/C	C/C	C/C	C/C	C/C	C/C	C/C	C/C
Jcr4U31892	289	Jcr4U31892_289	-	-	-	-	-	-	-	A	G	AB=0.891412;ABP=3225.98;AC=139;AF=0.731579;AN=190;AO=3945;CIGAR=1X;DP=4277;DPRA=0;EPP=8569.47;EPPR=108.822;GTI=0;HWE=-181.458;LEN=1;MEANALT=1.01053;MQM=0;MQMR=11.2961;NS=95;NUMALT=1;ODDS=0;PAIRED=0;PAIREDR=0;RO=331;RPP=8569.47;RPPR=273.355;RUN=1;SAP=8569.47;SRP=429.596;TYPE=snp;XAI=5.2265e-06;XAM=0.000613154;XAS=0.000607928;XRI=0.00127698;XRM=0.00779959;XRS=0.00652261;technology.Illumina=1;BVAR;S…	INTERGENIC(MODIFIER||||||||||1);UPSTREAM(MODIFIER||513||70|Jcr4U31892.10|protein_coding|CODING|Jcr4U31892.10||1)	G/G	G/G	G/G	G/G	G/G	G/G	G/G	G/G	G/G	G/G	G/G	G/G	G/G	G/G	G/G	G/G	G/G	G/G	G/G	G/G	G/G	G/G	G/G	G/G	G/G	G/G	G/G	G/G	./.	G/G	G/G	./.	G/G	G/G	G/G	G/G
Jcr4U32733	318	Jcr4U32733_318	GO:0008270;GO:0003676	-	-	nucleic acid binding; zinc ion binding	-	-	-	G	A	AB=0.134402;ABP=9202.57;AC=91;AF=0.478947;AN=190;AO=1081;CIGAR=1X;DP=8226;DPRA=0;EPP=2350.37;EPPR=14941.7;GTI=0;HWE=843.495;LEN=1;MEANALT=1;MQM=0;MQMR=0;NS=95;NUMALT=1;ODDS=0;PAIRED=0;PAIREDR=0;RO=7145;RPP=2350.37;RPPR=14975.8;RUN=1;SAP=2350.37;SRP=15483.5;TYPE=snp;XAI=0;XAM=0.000627807;XAS=0.000627807;XRI=1.44287e-06;XRM=0.00674134;XRS=0.0067399;technology.Illumina=1;BVAR;SURRSEQ=CTGGAAATACATACT…	SYNONYMOUS_CODING(LOW|SILENT|tgC/tgT|C314|383|Jcr4U32733.10|protein_coding|CODING|Jcr4U32733.10|3|1)	G/G	G/G	G/G	G/G	G/G	G/G	G/G	G/G	G/G	G/G	G/G	G/G	G/G	G/G	G/G	G/G	G/G	G/A	G/G	G/G	G/G	G/G	G/G	G/G	G/G	G/G	G/G	G/G	G/G	G/G	G/G	G/G	G/A	G/G	G/G	G/G
Jcr4S01470	1141	Jcr4S01470_1141	-	-	-	-	-	-	-	T	A	AB=0.128261;ABP=7134;AC=91;AF=0.478947;AN=190;AO=768;CIGAR=1X;DP=6085;DPRA=2.14716;EPP=1644.75;EPPR=218.944;GTI=0;HWE=843.495;LEN=1;MEANALT=1.02128;MQM=0;MQMR=0;NS=95;NUMALT=1;ODDS=0;PAIRED=0;PAIREDR=0;RO=5315;RPP=1670.7;RPPR=11114.2;RUN=1;SAP=1644.75;SRP=282.433;TYPE=snp;XAI=1.34235e-05;XAM=0.0104435;XAS=0.0104301;XRI=8.00672e-06;XRM=0.000774934;XRS=0.000766927;technology.Illumina=1;BVAR;SURRSEQ…	INTERGENIC(MODIFIER||||||||||1)	T/T	T/T	T/T	T/T	T/T	T/T	T/T	T/T	T/T	T/T	T/T	T/T	T/T	T/T	T/T	T/T	T/T	T/T	T/T	T/T	T/T	T/T	T/T	T/A	T/T	T/A	T/T	T/T	T/T	T/T	T/T	T/T	T/T	T/T	T/T	T/T
Jcr4U29074	1173	Jcr4U29074_1173	-	-	-	-	-	-	-	G	A	AB=0.131753;ABP=8898.18;AC=90;AF=0.473684;AN=190;AO=1015;CIGAR=1X;DP=7924;DPRA=0;EPP=983.551;EPPR=689.685;GTI=0;HWE=791.406;LEN=1;MEANALT=1.01053;MQM=0.0679803;MQMR=3.91836;NS=95;NUMALT=1;ODDS=0;PAIRED=0;PAIREDR=0;RO=6908;RPP=2207.05;RPPR=14994.9;RUN=1;SAP=983.551;SRP=691.544;TYPE=snp;XAI=0;XAM=0.00932293;XAS=0.00932293;XRI=1.95099e-05;XRM=0.00306901;XRS=0.0030495;technology.Illumina=1;BVAR;SURRS…	DOWNSTREAM(MODIFIER||546||65|Jcr4U29074.20|protein_coding|CODING|Jcr4U29074.20||1);NON_SYNONYMOUS_CODING(MODERATE|MISSENSE|cGt/cAt|R388H|391|Jcr4U29074.10|protein_coding|CODING|Jcr4U29074.10|1|1)	G/G	G/G	G/A	G/A	G/A	G/G	G/G	G/G	G/G	G/G	G/G	G/G	G/G	G/G	G/G	G/G	G/G	G/G	G/G	G/G	G/G	G/G	G/G	G/G	G/G	G/G	G/G	G/G	G/G	G/G	G/G	G/G	G/G	G/G	G/G	G/G
Jcr4S13405	1310	Jcr4S13405_1310	-	-	-	-	-	-	-	C	T	AB=0.122324;ABP=8105.72;AC=88;AF=0.458333;AN=192;AO=828;CIGAR=1X;DP=7023;DPRA=9.94043;EPP=1800.99;EPPR=559.586;GTI=0;HWE=663.709;LEN=1;MEANALT=1.01064;MQM=0;MQMR=0;NS=96;NUMALT=1;ODDS=0;PAIRED=0;PAIREDR=0;RO=6194;RPP=1057.16;RPPR=6889.26;RUN=1;SAP=1057.16;SRP=3204.65;TYPE=snp;XAI=6.25135e-05;XAM=0.00178784;XAS=0.00172533;XRI=3.34613e-06;XRM=0.00346416;XRS=0.00346081;technology.Illumina=1;BVAR;SUR…	INTERGENIC(MODIFIER||||||||||1);UPSTREAM(MODIFIER||2013||759|Jcr4S13405.20|protein_coding|CODING|Jcr4S13405.20||1);UPSTREAM(MODIFIER||335||281|Jcr4S13405.10|protein_coding|CODING|Jcr4S13405.10||1)	C/C	C/C	C/C	C/C	C/T	C/C	C/C	C/C	C/C	C/C	C/C	C/C	C/C	C/C	C/C	C/C	C/C	C/C	C/C	C/C	C/C	C/C	C/C	C/C	C/C	C/C	C/C	C/C	./.	C/C	C/C	C/C	C/C	C/C	C/C	C/C
Jcr4S01568	1469	Jcr4S01568_1469	-	-	-	-	-	-	-	A	G	AB=0.125274;ABP=5572.03;AC=80;AF=0.421053;AN=190;AO=613;CIGAR=1X;DP=5482;DPRA=0;EPP=1334.12;EPPR=20.8605;GTI=0;HWE=397.819;LEN=1;MEANALT=1.01053;MQM=0;MQMR=36.8549;NS=95;NUMALT=1;ODDS=0;PAIRED=0;PAIREDR=0;RO=4866;RPP=1334.12;RPPR=10063.1;RUN=1;SAP=1334.12;SRP=6.01091;TYPE=snp;XAI=0;XAM=0.0102475;XAS=0.0102475;XRI=0;XRM=0.000690962;XRS=0.000690962;technology.Illumina=1;BVAR;SURRSEQ=GAAGTTATTTCAGAT…	NON_SYNONYMOUS_CODING(MODERATE|MISSENSE|Aat/Gat|N49D|78|Jcr4S01568.10|protein_coding|CODING|Jcr4S01568.10|1|1|WARNING_TRANSCRIPT_NO_START_CODON);UPSTREAM(MODIFIER||1762||562|Jcr4S01568.20|protein_coding|CODING|Jcr4S01568.20||1)	A/A	A/A	A/A	A/A	A/A	A/A	A/A	A/A	A/A	A/A	A/A	A/A	A/A	A/A	A/A	A/A	A/A	A/A	A/A	A/A	A/A	A/A	A/G	A/A	A/A	A/A	A/A	A/A	A/A	A/A	A/A	A/A	A/A	A/A	A/G	A/A
Jcr4S15966	1747	Jcr4S15966_1747	-	-	-	-	-	-	-	G	A	AB=0.123775;ABP=10293.5;AC=95;AF=0.494792;AN=192;AO=1039;CIGAR=1X;DP=8453;DPRA=0;EPP=2259.17;EPPR=16080.6;GTI=0;HWE=1042.78;LEN=1;MEANALT=1.02083;MQM=0;MQMR=0;NS=96;NUMALT=1;ODDS=0;PAIRED=0;PAIREDR=0;RO=7412;RPP=2259.17;RPPR=16080.6;RUN=1;SAP=2259.17;SRP=16098;TYPE=snp;XAI=0;XAM=0.000698667;XAS=0.000698667;XRI=7.92466e-06;XRM=0.00374546;XRS=0.00373754;technology.Illumina=1;BVAR;SURRSEQ=ATGATGAACC…	INTRON(MODIFIER||||587|Jcr4S15966.10|protein_coding|CODING|Jcr4S15966.10|3|1)	G/G	G/G	G/G	G/G	G/G	G/G	G/G	G/G	G/G	G/G	G/G	G/G	G/G	G/G	G/G	G/G	G/G	G/G	G/G	G/G	G/G	G/A	G/G	G/G	G/G	G/G	G/G	G/G	./.	G/G	G/G	G/A	G/G	G/G	G/G	G/G
Jcr4S05628	1932	Jcr4S05628_1932	-	-	-	-	-	-	-	G	A	AB=0.130252;ABP=3111.83;AC=78;AF=0.40625;AN=192;AO=365;CIGAR=1X;DP=3146;DPRA=2.00709;EPP=778.321;EPPR=4231.12;GTI=0;HWE=316.679;LEN=1;MEANALT=1;MQM=0;MQMR=0;NS=96;NUMALT=1;ODDS=0;PAIRED=0;PAIREDR=0;RO=2781;RPP=778.321;RPPR=4267.54;RUN=1;SAP=795.598;SRP=5998.52;TYPE=snp;XAI=0;XAM=0.000702273;XAS=0.000702273;XRI=3.70704e-06;XRM=0.00599429;XRS=0.00599059;technology.Illumina=1;BVAR;SURRSEQ=CGAATAGTTC…	DOWNSTREAM(MODIFIER||1121||79|Jcr4S05628.10|protein_coding|CODING|Jcr4S05628.10||1);INTERGENIC(MODIFIER||||||||||1);UPSTREAM(MODIFIER||2392||2157|Jcr4S05628.20|protein_coding|CODING|Jcr4S05628.20||1)	G/G	G/G	G/G	G/G	G/G	G/G	G/G	G/G	G/G	G/G	G/G	G/G	G/G	G/G	G/G	G/G	G/G	./.	G/G	G/G	G/G	G/G	G/G	G/G	G/G	G/G	G/G	G/G	./.	G/G	G/G	G/G	G/G	G/G	G/G	G/G
Jcr4S20185	2367	Jcr4S20185_2367	-	-	-	-	-	-	-	A	T	AB=0.115682;ABP=11636.5;AC=84;AF=0.4375;AN=192;AO=1116;CIGAR=1X;DP=10275;DPRA=54.0684;EPP=2426.37;EPPR=4039.58;GTI=0;HWE=508.043;LEN=1;MEANALT=1.01053;MQM=11.9552;MQMR=4.45163;NS=96;NUMALT=1;ODDS=0;PAIRED=0;PAIREDR=0;RO=9158;RPP=1751.68;RPPR=16227.6;RUN=1;SAP=1751.68;SRP=2492.12;TYPE=snp;XAI=9.05108e-06;XAM=0.00142208;XAS=0.00141303;XRI=1.98762e-05;XRM=0.0129188;XRS=0.0128989;technology.Illumina=…	INTERGENIC(MODIFIER||||||||||1)	A/A	A/A	A/A	A/A	A/A	A/A	A/A	A/A	A/A	A/A	A/A	A/A	A/A	A/A	A/A	A/A	A/A	A/T	A/A	A/A	A/T	A/A	A/A	A/A	A/A	A/A	A/A	A/A	A/T	A/A	A/A	A/A	A/A	A/A	A/A	A/A
Jcr4U29415	2436	Jcr4U29415_2436	GO:0003676	-	-	nucleic acid binding	-	-	-	G	A	AB=0.117957;ABP=6258.16;AC=84;AF=0.4375;AN=192;AO=614;CIGAR=1X;DP=5562;DPRA=29.2632;EPP=1336.29;EPPR=10743.1;GTI=0;HWE=508.043;LEN=1;MEANALT=1.02105;MQM=0;MQMR=0.00343712;NS=96;NUMALT=1;ODDS=0;PAIRED=0;PAIREDR=0;RO=4946;RPP=1336.29;RPPR=10743.1;RUN=1;SAP=1336.29;SRP=10743.1;TYPE=snp;XAI=0;XAM=0.00571866;XAS=0.00571866;XRI=5.01456e-06;XRM=0.00967791;XRS=0.00967289;technology.Illumina=1;BVAR;SURRSE…	SYNONYMOUS_CODING(LOW|SILENT|caG/caA|Q18|617|Jcr4U29415.10|protein_coding|CODING|Jcr4U29415.10|1|1)	G/G	G/G	G/G	G/G	G/G	G/G	G/G	G/A	G/G	./.	G/G	G/G	G/G	G/G	G/G	G/G	G/G	G/G	G/G	G/G	G/G	G/G	G/G	G/G	G/G	G/G	G/G	G/G	G/G	G/G	G/G	G/G	G/G	G/G	G/G	G/G
Jcr4S13630	3922	Jcr4S13630_3922	-	-	-	-	-	-	-	T	G	AB=0.816996;ABP=2478.31;AC=162;AF=0.852632;AN=190;AO=7997;CIGAR=1X;DP=8706;DPRA=0;EPP=8484.96;EPPR=76.5923;GTI=0;HWE=-311.462;LEN=1;MEANALT=1;MQM=13.5917;MQMR=7.74612;NS=95;NUMALT=1;ODDS=0;PAIRED=0;PAIREDR=0;RO=709;RPP=17281.5;RPPR=1325.03;RUN=1;SAP=8424.36;SRP=134.245;TYPE=snp;XAI=1.16765e-05;XAM=0.00463861;XAS=0.00462693;XRI=0.000553525;XRM=0.00367623;XRS=0.00312271;technology.Illumina=1;BVAR;S…	INTERGENIC(MODIFIER||||||||||1);UPSTREAM(MODIFIER||1149||196|Jcr4S13630.20|protein_coding|CODING|Jcr4S13630.20||1);UPSTREAM(MODIFIER||427||453|Jcr4S13630.10|protein_coding|CODING|Jcr4S13630.10||1)	G/G	G/G	G/G	G/G	G/G	G/G	G/G	G/G	G/G	G/G	G/G	G/G	G/G	G/G	G/G	G/G	G/G	G/G	G/G	G/G	G/G	G/G	G/G	G/G	G/G	G/G	G/G	G/G	T/G	G/G	G/G	T/G	G/G	G/G	G/G	G/G
Jcr4S26598	4120	Jcr4S26598_4120	-	-	-	-	-	-	-	G	C	AB=0.10812;ABP=5998.85;AC=76;AF=0.395833;AN=192;AO=539;CIGAR=1X;DP=5627;DPRA=0;EPP=4.1746;EPPR=5.34828;GTI=0;HWE=238.499;LEN=1;MEANALT=1.02083;MQM=0;MQMR=0.0707825;NS=96;NUMALT=1;ODDS=0;PAIRED=0;PAIREDR=0;RO=5086;RPP=1173.43;RPPR=11038.4;RUN=1;SAP=4.1746;SRP=5.47637;TYPE=snp;XAI=0;XAM=0.0103226;XAS=0.0103226;XRI=1.05968e-05;XRM=0.0036463;XRS=0.0036357;technology.Illumina=1;BVAR;SURRSEQ=AGGTCTGGCT…	DOWNSTREAM(MODIFIER||2733||189|Jcr4S26598.10|protein_coding|CODING|Jcr4S26598.10||1);INTRON(MODIFIER||||80|Jcr4S26598.20|protein_coding|CODING|Jcr4S26598.20|1|1)	G/G	G/C	G/G	G/G	G/G	G/G	G/G	G/G	G/G	./.	G/G	G/G	G/G	G/G	G/G	G/G	G/G	G/G	G/G	G/G	G/G	G/G	G/G	G/G	G/G	G/G	G/G	G/G	G/G	G/G	G/C	G/G	G/G	G/G	G/G	G/G
Jcr4S11018	4457	Jcr4S11018_4457	-	-	-	-	-	-	-	C	T	AB=0.874609;ABP=3512.25;AC=110;AF=0.578947;AN=190;AO=3006;CIGAR=1X;DP=3388;DPRA=0;EPP=6530.46;EPPR=832.513;GTI=0;HWE=397.819;LEN=1;MEANALT=1;MQM=17.8945;MQMR=0.418848;NS=95;NUMALT=1;ODDS=0;PAIRED=0;PAIREDR=0;RO=382;RPP=6530.46;RPPR=832.513;RUN=1;SAP=6530.46;SRP=832.513;TYPE=snp;XAI=3.42957e-06;XAM=0.0101121;XAS=0.0101086;XRI=0;XRM=0.0183165;XRS=0.0183165;technology.Illumina=1;BVAR;SURRSEQ=AATGATG…	INTRON(MODIFIER||||819|Jcr4S11018.10|protein_coding|CODING|Jcr4S11018.10|6|1)	T/T	T/T	T/T	T/T	T/T	./.	T/T	T/T	T/T	T/T	T/T	T/T	T/T	T/T	T/T	T/T	T/T	T/T	T/T	C/T	T/T	T/T	T/T	T/T	T/T	T/T	./.	T/T	./.	T/T	T/T	./.	T/T	T/T	T/T	T/T
Jcr4S15518	5005	Jcr4S15518_5005	-	-	-	-	-	-	-	C	T	AB=0.122363;ABP=4993.7;AC=76;AF=0.395833;AN=192;AO=539;CIGAR=1X;DP=5056;DPRA=2.05873;EPP=1173.43;EPPR=9776.84;GTI=0;HWE=261.456;LEN=1;MEANALT=1;MQM=0;MQMR=0;NS=96;NUMALT=1;ODDS=0;PAIRED=0;PAIREDR=0;RO=4517;RPP=1173.43;RPPR=9811.55;RUN=1;SAP=1173.43;SRP=9776.84;TYPE=snp;XAI=1.91267e-05;XAM=0.0104606;XAS=0.0104415;XRI=1.14597e-05;XRM=0.00598307;XRS=0.00597161;technology.Illumina=1;BVAR;SURRSEQ=ATGT…	INTERGENIC(MODIFIER||||||||||1);UPSTREAM(MODIFIER||2413||290|Jcr4S15518.30|protein_coding|CODING|Jcr4S15518.30||1);UPSTREAM(MODIFIER||3002||492|Jcr4S15518.10|protein_coding|CODING|Jcr4S15518.10||1);UPSTREAM(MODIFIER||674||209|Jcr4S15518.20|protein_coding|CODING|Jcr4S15518.20||1)	C/C	C/C	C/C	C/C	C/C	C/C	./.	C/C	C/C	C/C	C/C	C/C	C/C	C/C	C/C	C/C	C/C	C/C	C/C	C/C	C/C	C/C	C/C	C/C	C/C	C/C	./.	C/C	C/C	C/C	C/C	C/C	C/C	C/C	C/C	C/C
Jcr4S07975	5029	Jcr4S07975_5029	-	-	-	-	-	-	-	C	A	AB=0.128147;ABP=8447.52;AC=93;AF=0.484375;AN=192;AO=915;CIGAR=1X;DP=7302;DPRA=0;EPP=1989.91;EPPR=5.4713;GTI=0;HWE=1157.81;LEN=1;MEANALT=1.05208;MQM=0.0404372;MQMR=36.9854;NS=96;NUMALT=1;ODDS=0;PAIRED=0;PAIREDR=0;RO=6375;RPP=1989.91;RPPR=13837.5;RUN=1;SAP=1989.91;SRP=5.58848;TYPE=snp;XAI=0;XAM=0.0103189;XAS=0.0103189;XRI=3.23428e-06;XRM=0.000720951;XRS=0.000717717;technology.Illumina=1;BVAR;SURRSE…	DOWNSTREAM(MODIFIER||4657||36|Jcr4S07975.10|protein_coding|CODING|Jcr4S07975.10||1);INTERGENIC(MODIFIER||||||||||1);UPSTREAM(MODIFIER||1241||285|Jcr4S07975.20|protein_coding|CODING|Jcr4S07975.20||1)	C/C	C/A	C/C	C/C	C/C	C/C	C/C	C/C	C/C	C/C	C/C	C/C	C/C	C/C	C/C	C/C	C/C	C/C	C/C	C/C	C/C	C/C	C/C	C/C	C/C	C/C	C/C	C/C	C/C	C/A	C/C	C/C	C/C	C/C	C/C	C/C
Jcr4S07781	5889	Jcr4S07781_5889	-	-	-	-	-	-	-	G	A	AB=0.129783;ABP=9056.71;AC=92;AF=0.484211;AN=190;AO=1000;CIGAR=1X;DP=7827;DPRA=0;EPP=2165.81;EPPR=14792.9;GTI=0;HWE=899.713;LEN=1;MEANALT=1;MQM=0;MQMR=0;NS=95;NUMALT=1;ODDS=0;PAIRED=0;PAIREDR=0;RO=6827;RPP=2174.48;RPPR=14827.7;RUN=1;SAP=2165.81;SRP=14792.9;TYPE=snp;XAI=1.03093e-05;XAM=0.000884962;XAS=0.000874653;XRI=6.10422e-06;XRM=0.00696707;XRS=0.00696097;technology.Illumina=1;BVAR;SURRSEQ=CACT…	SYNONYMOUS_CODING(LOW|SILENT|agC/agT|S319|471|Jcr4S07781.30|protein_coding|CODING|Jcr4S07781.30|3|1|WARNING_TRANSCRIPT_NO_START_CODON);UPSTREAM(MODIFIER||2114||488|Jcr4S07781.20|protein_coding|CODING|Jcr4S07781.20||1);UPSTREAM(MODIFIER||3205||146|Jcr4S07781.10|protein_coding|CODING|Jcr4S07781.10||1)	G/G	G/G	G/G	G/G	G/G	G/G	G/G	G/G	G/G	G/G	G/G	G/G	G/G	G/G	G/G	G/G	G/G	G/G	G/G	G/G	G/G	G/G	G/G	G/G	G/G	G/G	G/G	G/G	G/G	G/G	G/G	G/G	G/G	G/A	G/G	G/G
Jcr4S04024	6890	Jcr4S04024_6890	-	-	-	-	-	-	-	C	G	AB=0.116443;ABP=9616.15;AC=88;AF=0.458333;AN=192;AO=888;CIGAR=1X;DP=7938;DPRA=2.70281;EPP=1888.09;EPPR=15303.2;GTI=0;HWE=663.709;LEN=1;MEANALT=1.04255;MQM=0;MQMR=0;NS=96;NUMALT=1;ODDS=0;PAIRED=0;PAIREDR=0;RO=7046;RPP=1888.09;RPPR=15303.2;RUN=1;SAP=1931.28;SRP=15303.2;TYPE=snp;XAI=0;XAM=0.000638465;XAS=0.000638465;XRI=6.17871e-06;XRM=0.00540386;XRS=0.00539768;technology.Illumina=1;BVAR;SURRSEQ=GCA…	DOWNSTREAM(MODIFIER||54||595|Jcr4S04024.10|protein_coding|CODING|Jcr4S04024.10||1);INTERGENIC(MODIFIER||||||||||1);UPSTREAM(MODIFIER||399||415|Jcr4S04024.20|protein_coding|CODING|Jcr4S04024.20||1)	C/C	C/G	C/C	C/C	C/C	C/C	C/C	C/C	C/C	C/C	C/C	C/C	C/C	C/C	C/C	C/C	C/C	C/C	C/C	C/C	C/C	C/C	C/C	C/G	C/C	C/C	C/C	C/C	C/C	C/C	C/C	C/C	C/C	C/C	C/C	C/C
Jcr4S00875	8656	Jcr4S00875_8656	GO:0003676	-	-	nucleic acid binding	-	-	-	G	T	AB=0.143086;ABP=17293.9;AC=95;AF=0.494792;AN=192;AO=2236;CIGAR=1X;DP=15628;DPRA=164.495;EPP=4823.74;EPPR=2037.57;GTI=0;HWE=1042.78;LEN=1;MEANALT=1.01053;MQM=36.8672;MQMR=35.9049;NS=96;NUMALT=1;ODDS=0;PAIRED=0;PAIREDR=0;RO=13390;RPP=4351.25;RPPR=29044.3;RUN=1;SAP=4318.44;SRP=2028.39;TYPE=snp;XAI=4.51745e-06;XAM=0.00110815;XAS=0.00110363;XRI=1.76074e-05;XRM=0.00972712;XRS=0.00970951;technology.Illu…	DOWNSTREAM(MODIFIER||2591||1055|Jcr4S00875.10|protein_coding|CODING|Jcr4S00875.10||1);NON_SYNONYMOUS_CODING(MODERATE|MISSENSE|Cat/Aat|H932N|1053|Jcr4S00875.20|protein_coding|CODING|Jcr4S00875.20|3|1|WARNING_TRANSCRIPT_NO_START_CODON)	G/G	G/G	G/G	G/G	G/G	G/G	G/G	G/G	G/G	G/T	G/G	G/G	G/G	G/G	G/G	G/G	G/G	G/G	G/G	G/G	G/G	G/G	G/G	G/G	G/G	G/G	G/T	G/G	G/G	G/G	G/G	G/G	G/G	G/G	G/G	G/G
Jcr4S13119	9189	Jcr4S13119_9189	GO:0008270;GO:0003676	-	-	zinc ion binding; nucleic acid binding	-	-	-	G	A	AB=0.135364;ABP=7775.29;AC=86;AF=0.447917;AN=192;AO=931;CIGAR=1X;DP=7260;DPRA=3.22043;EPP=2024.65;EPPR=2958.54;GTI=0;HWE=582.426;LEN=1;MEANALT=1;MQM=0.0161117;MQMR=0.00268605;NS=96;NUMALT=1;ODDS=0;PAIRED=0;PAIREDR=0;RO=6329;RPP=159.471;RPPR=5511.82;RUN=1;SAP=159.471;SRP=131.936;TYPE=snp;XAI=1.10733e-05;XAM=0.010299;XAS=0.010288;XRI=4.88669e-06;XRM=0.00850632;XRS=0.00850143;technology.Illumina=1;B…	NON_SYNONYMOUS_CODING(MODERATE|MISSENSE|Gct/Act|A557T|1055|Jcr4S13119.10|protein_coding|CODING|Jcr4S13119.10|4|1)	G/G	G/G	G/G	G/G	G/G	G/G	G/G	G/G	G/G	G/G	G/G	G/G	G/A	G/G	G/G	G/G	G/G	./.	G/G	G/G	G/G	G/G	G/G	G/G	G/G	G/G	G/G	G/G	./.	G/G	G/G	G/G	G/G	G/G	G/G	G/G
Jcr4S13782	9957	Jcr4S13782_9957	-	-	-	-	-	-	-	T	C	AB=0.119838;ABP=7754.56;AC=88;AF=0.458333;AN=192;AO=763;CIGAR=1X;DP=6680;DPRA=70.3053;EPP=1659.84;EPPR=12851.6;GTI=0;HWE=663.709;LEN=1;MEANALT=1;MQM=37;MQMR=33.1663;NS=96;NUMALT=1;ODDS=0;PAIRED=0;PAIREDR=0;RO=5917;RPP=1659.84;RPPR=12851.6;RUN=1;SAP=1659.84;SRP=12851.6;TYPE=snp;XAI=0;XAM=0.000547538;XAS=0.000547538;XRI=5.24509e-06;XRM=0.005578;XRS=0.00557275;technology.Illumina=1;BVAR;SURRSEQ=CAAC…	UPSTREAM(MODIFIER||329||1282|Jcr4S13782.20|protein_coding|CODING|Jcr4S13782.20||1)	T/T	T/T	T/T	T/T	T/T	T/T	T/T	T/T	T/T	T/T	T/T	T/T	T/T	T/T	T/T	T/T	T/T	T/T	T/T	T/T	T/T	T/T	T/T	T/T	T/T	T/T	T/T	T/T	T/T	T/T	T/T	T/T	T/T	T/T	T/T	T/T
Jcr4S19681	10044	Jcr4S19681_10044	-	-	-	-	-	-	-	G	C	AB=0.113373;ABP=6381.92;AC=86;AF=0.447917;AN=192;AO=582;CIGAR=1X;DP=5441;DPRA=0;EPP=1266.81;EPPR=1167.41;GTI=0;HWE=582.426;LEN=1;MEANALT=1.01042;MQM=0.0979381;MQMR=24.7664;NS=96;NUMALT=1;ODDS=0;PAIRED=0;PAIREDR=0;RO=4858;RPP=1266.81;RPPR=1167.41;RUN=1;SAP=1266.81;SRP=10552;TYPE=snp;XAI=1.77135e-05;XAM=0.010298;XAS=0.0102803;XRI=6.36637e-06;XRM=0.0119084;XRS=0.011902;technology.Illumina=1;BVAR;SUR…	INTRON(MODIFIER||||1484|Jcr4S19681.40|protein_coding|CODING|Jcr4S19681.40|2|1);SPLICE_SITE_DONOR(HIGH||||1484|Jcr4S19681.40|protein_coding|CODING|Jcr4S19681.40|2|1);UPSTREAM(MODIFIER||2693||47|Jcr4S19681.30|protein_coding|CODING|Jcr4S19681.30||1)	G/G	G/G	G/G	G/G	G/G	G/G	G/G	G/G	G/G	G/G	G/G	G/G	G/G	G/G	G/G	G/G	G/G	G/G	G/G	G/G	G/C	G/G	G/G	G/G	G/G	G/G	G/G	G/G	./.	G/G	G/C	G/G	G/G	G/G	G/G	G/G
Jcr4S00036	11383	Jcr4S00036_11383	-	-	-	-	-	-	-	C	T	AB=0.127835;ABP=11936.1;AC=92;AF=0.479167;AN=192;AO=1282;CIGAR=1X;DP=10210;DPRA=107.463;EPP=2786.84;EPPR=19387.7;GTI=0;HWE=854.765;LEN=1;MEANALT=1.01053;MQM=20.014;MQMR=22.7699;NS=96;NUMALT=1;ODDS=0;PAIRED=0;PAIREDR=0;RO=8927;RPP=2786.84;RPPR=19387.7;RUN=1;SAP=2786.84;SRP=19387.7;TYPE=snp;XAI=1.6806e-05;XAM=0.0100492;XAS=0.0100324;XRI=9.23874e-06;XRM=0.0132457;XRS=0.0132364;technology.Illumina=1;…	DOWNSTREAM(MODIFIER||390||1324|Jcr4S00036.20|protein_coding|CODING|Jcr4S00036.20||1);INTERGENIC(MODIFIER||||||||||1);UPSTREAM(MODIFIER||3981||1354|Jcr4S00036.30|protein_coding|CODING|Jcr4S00036.30||1)	C/C	C/C	C/C	C/C	C/C	C/T	C/C	C/C	C/C	C/C	C/C	C/C	C/C	C/C	C/C	C/C	C/C	C/C	C/C	C/C	C/C	C/C	C/C	C/T	C/C	C/C	C/C	C/C	C/C	C/C	C/C	C/C	C/C	C/C	C/C	C/C
Jcr4S10067	13510	Jcr4S10067_13510	GO:0015074;GO:0008270;GO:0003676	DNA integration	-	zinc ion binding; nucleic acid binding	-	-	-	A	T	AB=0.123132;ABP=4130.81;AC=81;AF=0.426316;AN=190;AO=436;CIGAR=1X;DP=3906;DPRA=2.43367;EPP=949.772;EPPR=7063.53;GTI=0;HWE=430.014;LEN=1;MEANALT=1.02128;MQM=0;MQMR=33.8123;NS=95;NUMALT=1;ODDS=0;PAIRED=0;PAIREDR=0;RO=3468;RPP=949.772;RPPR=7063.53;RUN=1;SAP=949.772;SRP=7533.68;TYPE=snp;XAI=0;XAM=0.00521378;XAS=0.00521378;XRI=1.05224e-05;XRM=0.00152657;XRS=0.00151605;technology.Illumina=1;BVAR;SURRSEQ…	SYNONYMOUS_CODING(LOW|SILENT|tcT/tcA|S506|928|Jcr4S10067.30|protein_coding|CODING|Jcr4S10067.30|5|1)	A/A	A/A	./.	A/A	A/A	A/A	A/A	A/A	A/A	A/A	A/A	A/A	A/A	A/A	A/A	A/A	A/A	./.	A/A	A/A	A/A	./.	A/A	A/A	A/A	A/A	A/A	A/A	./.	A/A	A/A	A/A	A/A	A/A	A/A	A/A
Jcr4S15905	15020	Jcr4S15905_15020	-	-	-	-	-	-	-	C	T	AB=0.116521;ABP=3938.42;AC=79;AF=0.411458;AN=192;AO=390;CIGAR=1X;DP=3812;DPRA=1.59453;EPP=849.885;EPPR=219.558;GTI=0;HWE=345.748;LEN=1;MEANALT=1.02105;MQM=0;MQMR=0;NS=96;NUMALT=1;ODDS=0;PAIRED=0;PAIREDR=0;RO=3420;RPP=849.885;RPPR=7394.74;RUN=1;SAP=849.885;SRP=225.532;TYPE=snp;XAI=0;XAM=0.000343109;XAS=0.000343109;XRI=6.02882e-06;XRM=0.00273511;XRS=0.00272909;technology.Illumina=1;BVAR;SURRSEQ=CAA…	DOWNSTREAM(MODIFIER||1885||156|Jcr4S15905.30|protein_coding|CODING|Jcr4S15905.30||1);UPSTREAM(MODIFIER||2665||720|Jcr4S15905.20|protein_coding|CODING|Jcr4S15905.20||1)	C/C	C/C	C/C	C/C	C/C	C/C	C/C	C/C	C/C	./.	C/C	C/C	C/C	C/C	C/C	C/C	C/C	C/C	./.	C/C	C/C	C/C	C/C	C/C	C/C	C/C	./.	C/C	./.	C/C	C/C	./.	C/C	C/C	C/C	C/C
Jcr4S27335	237	Jcr4S27335_237	-	-	-	-	-	-	-	G	A	AB=0.119407;ABP=5260.87;AC=65;AF=0.338542;AN=192;AO=569;CIGAR=1X;DP=5767;DPRA=2.16092;EPP=130.814;EPPR=5586.82;GTI=0;HWE=15.2559;LEN=1;MEANALT=1;MQM=5.7645;MQMR=15.3363;NS=96;NUMALT=1;ODDS=0;PAIRED=0;PAIREDR=0;RO=5198;RPP=1238.58;RPPR=8439.94;RUN=1;SAP=130.814;SRP=5784.02;TYPE=snp;XAI=4.35888e-05;XAM=0.00826091;XAS=0.00821732;XRI=1.47087e-05;XRM=0.0204804;XRS=0.0204657;technology.Illumina=1;BVAR;…	INTERGENIC(MODIFIER||||||||||1)	G/G	G/G	./.	G/G	G/G	G/G	G/G	G/G	G/G	G/G	G/G	G/G	G/G	G/G	G/G	G/G	G/G	G/G	G/G	G/G	G/G	G/G	G/G	G/G	G/G	G/G	G/G	G/G	G/A	G/G	G/G	G/A	G/G	G/G	G/G	G/G
Jcr4U31914	1156	Jcr4U31914_1156	-	-	-	-	-	-	-	G	A	AB=0.131471;ABP=2874.31;AC=76;AF=0.395833;AN=192;AO=334;CIGAR=1X;DP=2954;DPRA=1.63284;EPP=728.282;EPPR=5683.59;GTI=0;HWE=261.456;LEN=1;MEANALT=1;MQM=0;MQMR=0;NS=96;NUMALT=1;ODDS=0;PAIRED=0;PAIREDR=0;RO=2620;RPP=728.282;RPPR=5692.27;RUN=1;SAP=728.282;SRP=5683.59;TYPE=snp;XAI=0;XAM=0.000419162;XAS=0.000419162;XRI=7.71069e-06;XRM=0.00459465;XRS=0.00458694;technology.Illumina=1;BVAR;SURRSEQ=GCTTTCAAC…	UPSTREAM(MODIFIER||559||103|Jcr4U31914.10|protein_coding|CODING|Jcr4U31914.10||1)	G/G	G/G	G/G	G/G	G/G	G/G	./.	G/G	G/G	./.	G/A	G/G	G/G	G/G	G/G	./.	G/G	./.	G/G	G/G	G/G	G/G	G/G	./.	G/G	G/G	G/G	G/G	./.	G/G	G/G	./.	G/G	G/G	G/G	G/G
Jcr4S20331	2553	Jcr4S20331_2553	-	-	-	-	-	-	-	A	G	AB=0.123435;ABP=4822.54;AC=82;AF=0.427083;AN=192;AO=508;CIGAR=1X;DP=4501;DPRA=23.6789;EPP=1106.12;EPPR=1296.41;GTI=0;HWE=439.45;LEN=1;MEANALT=1.01053;MQM=0;MQMR=0;NS=96;NUMALT=1;ODDS=0;PAIRED=0;PAIREDR=0;RO=3992;RPP=1106.12;RPPR=1296.41;RUN=1;SAP=1106.12;SRP=8671.53;TYPE=snp;XAI=2.02939e-05;XAM=0.00955522;XAS=0.00953493;XRI=0;XRM=0.00760988;XRS=0.00760988;technology.Illumina=1;BVAR;SURRSEQ=GAAAAT…	DOWNSTREAM(MODIFIER||2285||561|Jcr4S20331.30|protein_coding|CODING|Jcr4S20331.30||1);INTERGENIC(MODIFIER||||||||||1);UPSTREAM(MODIFIER||1377||99|Jcr4S20331.20|protein_coding|CODING|Jcr4S20331.20||1);UPSTREAM(MODIFIER||1534||161|Jcr4S20331.10|protein_coding|CODING|Jcr4S20331.10||1)	A/A	A/A	A/A	A/A	A/A	A/A	A/G	A/A	A/A	A/A	A/A	A/A	A/A	A/A	A/A	A/A	A/A	A/A	A/A	A/A	A/A	A/A	A/A	A/A	A/A	A/A	A/A	A/A	A/A	A/A	A/G	./.	A/A	A/A	A/A	A/A
Jcr4S20161	4448	Jcr4S20161_4448	-	-	-	-	-	-	-	T	A	AB=0.151576;ABP=15119.7;AC=95;AF=0.494792;AN=192;AO=2173;CIGAR=1X;DP=14338;DPRA=75.4526;EPP=4721.62;EPPR=126.584;GTI=0;HWE=1042.78;LEN=1;MEANALT=1.01053;MQM=14.9926;MQMR=20.6703;NS=96;NUMALT=1;ODDS=0;PAIRED=0;PAIREDR=0;RO=12164;RPP=4721.62;RPPR=25478.5;RUN=1;SAP=4721.62;SRP=70.3102;TYPE=snp;XAI=9.48852e-06;XAM=0.0102662;XAS=0.0102568;XRI=8.61819e-06;XRM=0.00369927;XRS=0.00369065;technology.Illumi…	INTERGENIC(MODIFIER||||||||||1)	T/T	T/T	T/T	T/T	T/T	T/T	T/T	T/T	T/T	T/T	T/T	T/T	T/T	T/T	T/T	T/T	T/T	T/A	T/T	T/A	T/T	T/T	T/T	T/A	T/T	T/T	T/T	T/T	T/T	T/T	T/T	T/T	T/T	T/T	T/T	T/T
Jcr4S07975	5022	Jcr4S07975_5022	-	-	-	-	-	-	-	C	G	AB=0.127518;ABP=8499.01;AC=93;AF=0.484375;AN=192;AO=913;CIGAR=1X;DP=7325;DPRA=0;EPP=1985.56;EPPR=4.07332;GTI=0;HWE=1157.81;LEN=1;MEANALT=1.03125;MQM=0;MQMR=36.8768;NS=96;NUMALT=1;ODDS=0;PAIRED=0;PAIREDR=0;RO=6406;RPP=1985.56;RPPR=13913.5;RUN=1;SAP=1985.56;SRP=4.07332;TYPE=snp;XAI=0;XAM=0.0103303;XAS=0.0103303;XRI=3.21863e-06;XRM=0.000740499;XRS=0.00073728;technology.Illumina=1;BVAR;SURRSEQ=CCCGCT…	DOWNSTREAM(MODIFIER||4650||36|Jcr4S07975.10|protein_coding|CODING|Jcr4S07975.10||1);INTERGENIC(MODIFIER||||||||||1);UPSTREAM(MODIFIER||1248||285|Jcr4S07975.20|protein_coding|CODING|Jcr4S07975.20||1)	C/C	C/G	C/C	C/C	C/C	C/C	C/C	C/C	C/C	C/C	C/C	C/C	C/C	C/C	C/C	C/C	C/C	C/C	C/C	C/C	C/C	C/C	C/C	C/C	C/C	C/C	C/C	C/C	C/C	C/G	C/C	C/C	C/C	C/C	C/C	C/C
Jcr4S20918	5073	Jcr4S20918_5073	-	-	-	-	-	-	-	C	T	AB=0.1333;ABP=4664.43;AC=83;AF=0.432292;AN=192;AO=555;CIGAR=1X;DP=4550;DPRA=2.37388;EPP=1208.18;EPPR=8643.33;GTI=0;HWE=473.078;LEN=1;MEANALT=1;MQM=0;MQMR=0;NS=96;NUMALT=1;ODDS=0;PAIRED=0;PAIREDR=0;RO=3995;RPP=1208.18;RPPR=8652;RUN=1;SAP=1208.18;SRP=8669.36;TYPE=snp;XAI=0;XAM=0.00928512;XAS=0.00928512;XRI=7.74164e-06;XRM=0.00790273;XRS=0.00789499;technology.Illumina=1;BVAR;SURRSEQ=CGCGGGTGTTCTACGA…	UPSTREAM(MODIFIER||1533||924|Jcr4S20918.10|protein_coding|CODING|Jcr4S20918.10||1)	C/C	C/C	C/C	C/C	C/C	C/C	C/C	C/C	C/C	C/C	C/C	C/C	C/C	C/T	C/C	C/T	C/C	C/C	C/C	C/C	C/C	C/C	C/C	C/C	C/C	C/C	C/C	C/C	C/C	C/C	C/C	C/C	C/C	C/C	C/T	C/C
Jcr4S18540	5130	Jcr4S18540_5130	GO:0015074;GO:0008270;GO:0003676	DNA integration	-	nucleic acid binding; zinc ion binding	-	-	-	A	G	AB=0.11474;ABP=4542.3;AC=73;AF=0.380208;AN=192;AO=446;CIGAR=1X;DP=4690;DPRA=4.7305;EPP=861.862;EPPR=18.1614;GTI=0;HWE=185.271;LEN=1;MEANALT=1.03191;MQM=0.461883;MQMR=36.9703;NS=96;NUMALT=1;ODDS=0;PAIRED=0;PAIREDR=0;RO=4240;RPP=971.487;RPPR=9210.05;RUN=1;SAP=861.862;SRP=18.1614;TYPE=snp;XAI=0;XAM=0.0104477;XAS=0.0104477;XRI=2.01233e-05;XRM=0.000729001;XRS=0.000708878;technology.Illumina=1;BVAR;SUR…	NON_SYNONYMOUS_CODING(MODERATE|MISSENSE|Atc/Gtc|I1202V|1204|Jcr4S18540.10|protein_coding|CODING|Jcr4S18540.10|4|1)	A/A	A/A	A/A	A/A	A/A	A/A	A/A	A/A	A/A	A/A	A/A	A/A	A/A	A/A	./.	A/A	A/A	A/A	A/A	A/A	A/G	A/A	A/A	A/A	A/A	A/A	A/A	A/A	A/A	A/A	A/A	./.	A/A	A/A	A/A	A/A
Jcr4S08290	5138	Jcr4S08290_5138	-	-	-	-	-	-	-	C	G	AB=0.120247;ABP=5274;AC=83;AF=0.432292;AN=192;AO=536;CIGAR=1X;DP=4845;DPRA=10.1895;EPP=1166.92;EPPR=210.069;GTI=0;HWE=473.078;LEN=1;MEANALT=1;MQM=0.0690299;MQMR=20.5799;NS=96;NUMALT=1;ODDS=0;PAIRED=0;PAIREDR=0;RO=4309;RPP=1158.25;RPPR=9359.88;RUN=1;SAP=1158.25;SRP=210.069;TYPE=snp;XAI=0;XAM=0.000514208;XAS=0.000514208;XRI=1.19625e-05;XRM=0.00230087;XRS=0.0022889;technology.Illumina=1;BVAR;SURRSEQ…	DOWNSTREAM(MODIFIER||3680||113|Jcr4S08290.10|protein_coding|CODING|Jcr4S08290.10||1)	C/C	C/C	C/C	C/C	C/C	C/C	C/C	C/C	C/C	./.	C/C	C/C	C/C	C/C	C/C	C/C	C/C	C/C	C/C	C/C	C/G	C/C	C/C	C/C	C/C	C/C	C/C	C/C	./.	C/C	C/C	./.	C/C	C/C	C/C	C/C
Jcr4S09788	6596	Jcr4S09788_6596	-	-	-	-	-	-	-	C	T	AB=0.120275;ABP=5105.4;AC=87;AF=0.453125;AN=192;AO=505;CIGAR=1X;DP=4427;DPRA=1.85347;EPP=1099.6;EPPR=8515.18;GTI=0;HWE=622.118;LEN=1;MEANALT=1.01053;MQM=0;MQMR=0;NS=96;NUMALT=1;ODDS=0;PAIRED=0;PAIREDR=0;RO=3920;RPP=1099.6;RPPR=8515.18;RUN=1;SAP=1099.6;SRP=8515.18;TYPE=snp;XAI=0;XAM=0.00948191;XAS=0.00948191;XRI=2.80332e-06;XRM=0.00776531;XRS=0.0077625;technology.Illumina=1;BVAR;SURRSEQ=CGCGGGTGTT…	DOWNSTREAM(MODIFIER||1309||159|Jcr4S09788.20|protein_coding|CODING|Jcr4S09788.20||1);INTERGENIC(MODIFIER||||||||||1);UPSTREAM(MODIFIER||1550||1433|Jcr4S09788.10|protein_coding|CODING|Jcr4S09788.10||1)	C/C	C/C	C/C	C/C	C/C	C/C	C/C	C/C	C/C	C/C	C/C	C/C	C/C	C/C	C/C	C/C	C/C	C/C	C/C	C/C	C/C	C/C	C/C	C/C	C/C	C/C	C/C	C/C	C/C	C/C	C/C	C/T	C/C	C/C	C/C	C/C
Jcr4S02275	10522	Jcr4S02275_10522	-	-	-	-	-	-	-	G	A	AB=0.129546;ABP=5836.74;AC=91;AF=0.473958;AN=192;AO=642;CIGAR=1X;DP=5061;DPRA=4.46543;EPP=1397.1;EPPR=8235.56;GTI=0;HWE=802.493;LEN=1;MEANALT=1.11702;MQM=0;MQMR=0.229583;NS=96;NUMALT=1;ODDS=0;PAIRED=0;PAIREDR=0;RO=4408;RPP=1397.1;RPPR=8618.52;RUN=1;SAP=1397.1;SRP=9170.98;TYPE=snp;XAI=0;XAM=0.0103147;XAS=0.0103147;XRI=0.000131705;XRM=0.00665023;XRS=0.00651852;technology.Illumina=1;BVAR;SURRSEQ=CTA…	INTRON(MODIFIER||||2008|Jcr4S02275.30|protein_coding|CODING|Jcr4S02275.30|1|1);UPSTREAM(MODIFIER||2095||89|Jcr4S02275.40|protein_coding|CODING|Jcr4S02275.40||1);UPSTREAM(MODIFIER||2701||537|Jcr4S02275.50|protein_coding|CODING|Jcr4S02275.50||1)	G/G	G/G	./.	G/G	G/G	G/G	G/G	G/G	G/G	G/G	G/G	G/G	G/A	G/G	G/A	G/G	G/G	G/G	G/G	G/G	G/G	G/G	G/G	G/G	G/G	G/G	G/G	G/G	G/G	G/G	G/G	G/G	G/G	G/G	G/G	G/G
Jcr4S20518	11792	Jcr4S20518_11792	-	-	-	-	-	-	-	C	A	AB=0.0997512;ABP=5596.73;AC=70;AF=0.368421;AN=190;AO=462;CIGAR=1X;DP=5446;DPRA=1.30609;EPP=1006.23;EPPR=10812.6;GTI=0;HWE=131.157;LEN=1;MEANALT=1.06383;MQM=0;MQMR=0;NS=95;NUMALT=1;ODDS=0;PAIRED=0;PAIREDR=0;RO=4978;RPP=1006.23;RPPR=10812.6;RUN=1;SAP=1006.23;SRP=10812.6;TYPE=snp;XAI=0;XAM=0.000694019;XAS=0.000694019;XRI=1.38222e-05;XRM=0.0018419;XRS=0.00182808;technology.Illumina=1;BVAR;SURRSEQ=GAT…	INTRON(MODIFIER||||170|Jcr4S20518.30|protein_coding|CODING|Jcr4S20518.30|1|1);UPSTREAM(MODIFIER||3449||671|Jcr4S20518.20|protein_coding|CODING|Jcr4S20518.20||1)	C/C	C/C	C/C	C/C	C/C	C/C	C/C	C/C	C/C	C/C	C/C	C/C	C/C	C/A	C/C	C/C	C/C	C/C	C/C	C/C	C/C	C/C	C/C	C/C	C/C	C/C	C/C	C/C	./.	C/A	C/C	./.	C/C	C/C	C/C	C/C
Jcr4S09695	14534	Jcr4S09695_14534	-	-	-	-	-	-	-	T	C	AB=0.118958;ABP=4020.97;AC=77;AF=0.401042;AN=192;AO=407;CIGAR=1X;DP=3919;DPRA=2.65752;EPP=886.8;EPPR=2038.75;GTI=0;HWE=288.598;LEN=1;MEANALT=1.02151;MQM=0;MQMR=0;NS=96;NUMALT=1;ODDS=0;PAIRED=0;PAIREDR=0;RO=3510;RPP=886.8;RPPR=2038.75;RUN=1;SAP=886.8;SRP=7624.88;TYPE=snp;XAI=0;XAM=0.00370274;XAS=0.00370274;XRI=1.60998e-05;XRM=0.00647779;XRS=0.00646169;technology.Illumina=1;BVAR;SURRSEQ=TGTACGTGTGG…	NON_SYNONYMOUS_CODING(MODERATE|MISSENSE|cAa/cGa|Q29R|1985|Jcr4S09695.30|protein_coding|CODING|Jcr4S09695.30|2|1)	T/T	T/T	./.	T/T	T/T	T/T	T/T	T/T	T/T	T/T	T/T	T/C	T/T	T/T	T/T	T/T	T/T	T/T	T/T	T/T	T/T	T/T	T/T	T/T	T/T	T/T	T/T	T/T	T/T	T/T	T/T	T/T	T/T	T/T	T/T	T/T
Jcr4S06950	15573	Jcr4S06950_15573	-	-	-	-	-	-	-	A	G	AB=0.119731;ABP=4860.03;AC=80;AF=0.416667;AN=192;AO=491;CIGAR=1X;DP=4554;DPRA=2.08511;EPP=1069.2;EPPR=1421.25;GTI=0;HWE=375.859;LEN=1;MEANALT=1;MQM=0;MQMR=0;NS=96;NUMALT=1;ODDS=0;PAIRED=0;PAIREDR=0;RO=4063;RPP=1069.2;RPPR=1421.25;RUN=1;SAP=1069.2;SRP=8825.7;TYPE=snp;XAI=0;XAM=0.00971033;XAS=0.00971033;XRI=3.90672e-06;XRM=0.00767758;XRS=0.00767368;technology.Illumina=1;BVAR;SURRSEQ=GAAGATAGTCGCGTC…	DOWNSTREAM(MODIFIER||835||543|Jcr4S06950.20|protein_coding|CODING|Jcr4S06950.20||1)	A/A	A/A	./.	A/A	A/A	A/A	A/A	A/A	A/A	A/A	A/A	A/A	A/A	A/A	A/A	A/A	A/A	A/A	A/A	A/A	A/A	A/A	A/A	A/A	A/A	A/A	A/A	A/A	A/A	A/A	A/A	./.	A/A	A/A	A/A	A/A
Jcr4S05426	21568	Jcr4S05426_21568	-	-	-	-	-	-	-	G	C	AB=0.12495;ABP=24282.2;AC=87;AF=0.453125;AN=192;AO=2571;CIGAR=1X;DP=21885;DPRA=0;EPP=3.25439;EPPR=9.27285;GTI=0;HWE=622.118;LEN=1;MEANALT=1.02083;MQM=37;MQMR=36.9993;NS=96;NUMALT=1;ODDS=0;PAIRED=0;PAIREDR=0;RO=19312;RPP=5568.51;RPPR=41929.8;RUN=1;SAP=3.15304;SRP=9.37944;TYPE=snp;XAI=7.61868e-05;XAM=0.000748832;XAS=0.000672646;XRI=3.16464e-05;XRM=0.00432617;XRS=0.00429452;technology.Illumina=1;BVA…	UPSTREAM(MODIFIER||971||64|Jcr4S05426.40|protein_coding|CODING|Jcr4S05426.40||1)	G/G	G/G	G/G	G/G	G/G	G/C	G/G	G/G	G/G	G/G	G/G	G/C	G/G	G/G	G/G	G/G	G/G	G/G	G/G	G/G	G/G	G/G	G/G	G/G	G/G	G/G	G/G	G/G	G/G	G/G	G/G	G/G	G/C	G/G	G/G	G/G
Jcr4S01322	23729	Jcr4S01322_23729	GO:0015074;GO:0008270;GO:0003676	DNA integration	-	nucleic acid binding; zinc ion binding	-	-	-	C	T	AB=0.145936;ABP=17686.3;AC=95;AF=0.494792;AN=192;AO=2370;CIGAR=1X;DP=16242;DPRA=85.4737;EPP=5149.4;EPPR=29839.7;GTI=0;HWE=1042.78;LEN=1;MEANALT=1;MQM=0;MQMR=16.692;NS=96;NUMALT=1;ODDS=0;PAIRED=0;PAIREDR=0;RO=13872;RPP=5149.4;RPPR=29857;RUN=1;SAP=5149.4;SRP=30056.2;TYPE=snp;XAI=0;XAM=0.000551287;XAS=0.000551287;XRI=3.7236e-06;XRM=0.00320113;XRS=0.0031974;technology.Illumina=1;BVAR;SURRSEQ=GTATCAAG…	SYNONYMOUS_CODING(LOW|SILENT|ggC/ggT|G1134|1532|Jcr4S01322.50|protein_coding|CODING|Jcr4S01322.50|1|1|WARNING_TRANSCRIPT_INCOMPLETE);UPSTREAM(MODIFIER||4541||133|Jcr4S01322.40|protein_coding|CODING|Jcr4S01322.40||1)	C/C	C/C	C/C	C/C	C/C	C/C	C/C	C/C	C/T	C/C	C/C	C/C	C/C	C/C	C/C	C/C	C/C	C/T	C/C	C/C	C/C	C/C	C/C	C/C	C/C	C/C	C/C	C/C	C/C	C/C	C/C	C/C	C/C	C/C	C/C	C/C
Jcr4S16691	680	Jcr4S16691_680	-	-	-	-	-	-	-	G	A	AB=0.159373;ABP=20383.7;AC=95;AF=0.494792;AN=192;AO=3223;CIGAR=1X;DP=20226;DPRA=70.9579;EPP=4519.05;EPPR=280.502;GTI=0;HWE=1042.78;LEN=1;MEANALT=1.01053;MQM=12.4573;MQMR=5.33784;NS=96;NUMALT=1;ODDS=0;PAIRED=0;PAIREDR=0;RO=17002;RPP=6692.47;RPPR=13679.3;RUN=1;SAP=4773.73;SRP=3419.43;TYPE=snp;XAI=6.84889e-06;XAM=0.00149692;XAS=0.00149007;XRI=0.000192058;XRM=0.010122;XRS=0.00992996;technology.Illumi…	NON_SYNONYMOUS_CODING(MODERATE|MISSENSE|Gat/Aat|D29N|595|Jcr4S16691.10|protein_coding|CODING|Jcr4S16691.10|1|1)	G/G	G/A	G/G	G/A	G/G	G/G	G/G	G/G	G/G	G/G	G/G	G/A	G/G	G/G	G/G	G/G	G/G	G/G	G/G	G/G	G/G	G/G	G/G	G/G	G/G	G/G	G/G	G/G	G/G	G/G	G/G	G/G	G/G	G/A	G/G	G/G
Jcr4S11339	1589	Jcr4S11339_1589	-	-	-	-	-	-	-	G	A	AB=0.140677;ABP=8158.3;AC=93;AF=0.484375;AN=192;AO=1026;CIGAR=1X;DP=7386;DPRA=77.7368;EPP=2230.94;EPPR=13605.8;GTI=0;HWE=911.165;LEN=1;MEANALT=1.04211;MQM=0;MQMR=0;NS=96;NUMALT=1;ODDS=0;PAIRED=0;PAIREDR=0;RO=6356;RPP=2230.94;RPPR=13605.8;RUN=1;SAP=2230.94;SRP=13770.2;TYPE=snp;XAI=1.0048e-05;XAM=0.000609685;XAS=0.000599636;XRI=2.8068e-05;XRM=0.00587594;XRS=0.00584787;technology.Illumina=1;BVAR;SUR…	INTERGENIC(MODIFIER||||||||||1)	G/G	G/G	G/G	G/G	G/G	G/G	G/G	G/G	G/G	G/G	G/G	G/G	G/G	G/A	G/G	G/G	G/A	G/G	G/G	G/G	G/G	G/A	G/G	G/G	G/G	G/G	G/G	G/G	G/G	G/A	G/G	G/G	G/G	G/G	G/G	G/G
Jcr4S05628	1967	Jcr4S05628_1967	-	-	-	-	-	-	-	C	T	AB=0.113915;ABP=3696.88;AC=74;AF=0.385417;AN=192;AO=355;CIGAR=1X;DP=3568;DPRA=1.77726;EPP=528.133;EPPR=6934.42;GTI=0;HWE=209.83;LEN=1;MEANALT=1.01111;MQM=0;MQMR=0;NS=96;NUMALT=1;ODDS=0;PAIRED=0;PAIREDR=0;RO=3212;RPP=528.133;RPPR=6934.42;RUN=1;SAP=773.883;SRP=6977.78;TYPE=snp;XAI=0;XAM=0.000739744;XAS=0.000739744;XRI=3.20961e-06;XRM=0.00574285;XRS=0.00573964;technology.Illumina=1;BVAR;SURRSEQ=CGCG…	DOWNSTREAM(MODIFIER||1156||79|Jcr4S05628.10|protein_coding|CODING|Jcr4S05628.10||1);INTERGENIC(MODIFIER||||||||||1);UPSTREAM(MODIFIER||2357||2157|Jcr4S05628.20|protein_coding|CODING|Jcr4S05628.20||1)	C/C	C/C	C/C	C/C	C/C	C/C	./.	C/C	C/C	C/C	C/C	C/C	C/C	C/C	C/C	C/C	C/C	C/C	C/C	C/C	C/C	C/C	C/C	C/C	C/C	C/C	C/C	C/C	C/C	C/C	C/C	C/C	C/C	C/C	C/C	C/C
Jcr4S26704	2539	Jcr4S26704_2539	-	-	-	-	-	-	-	G	C	AB=0.148566;ABP=11895.6;AC=96;AF=0.5;AN=192;AO=1653;CIGAR=1X;DP=11182;DPRA=0;EPP=14.866;EPPR=2403.1;GTI=0;HWE=1438.19;LEN=1;MEANALT=1.02083;MQM=0;MQMR=0;NS=96;NUMALT=1;ODDS=0;PAIRED=0;PAIREDR=0;RO=9527;RPP=3592.45;RPPR=20413.6;RUN=1;SAP=14.866;SRP=2326.8;TYPE=snp;XAI=6.50495e-06;XAM=0.000733;XAS=0.000726495;XRI=1.51841e-05;XRM=0.00333816;XRS=0.00332297;technology.Illumina=1;BVAR;SURRSEQ=GTGTGTATG…	DOWNSTREAM(MODIFIER||1021||103|Jcr4S26704.20|protein_coding|CODING|Jcr4S26704.20||1);DOWNSTREAM(MODIFIER||1189||147|Jcr4S26704.10|protein_coding|CODING|Jcr4S26704.10||1);DOWNSTREAM(MODIFIER||4656||1905|Jcr4S26704.40|protein_coding|CODING|Jcr4S26704.40||1);INTERGENIC(MODIFIER||||||||||1);UPSTREAM(MODIFIER||2827||360|Jcr4S26704.30|protein_coding|CODING|Jcr4S26704.30||1)	G/G	G/G	G/C	G/G	G/G	G/G	G/G	G/G	G/G	G/G	G/C	G/G	G/G	G/G	G/G	G/G	G/G	G/C	G/G	G/G	G/G	G/G	G/G	G/G	G/G	G/G	G/G	G/G	G/G	G/G	G/G	G/G	G/G	G/G	G/G	G/G
Jcr4S00316	2593	Jcr4S00316_2593	GO:0015074;GO:0008270;GO:0003676	DNA integration	-	zinc ion binding; nucleic acid binding	-	-	-	C	A	AB=0.160824;ABP=28676.9;AC=95;AF=0.494792;AN=192;AO=4615;CIGAR=1X;DP=28700;DPRA=75.5158;EPP=10007;EPPR=18500.5;GTI=0;HWE=1042.78;LEN=1;MEANALT=1.02105;MQM=22.7807;MQMR=22.7508;NS=96;NUMALT=1;ODDS=0;PAIRED=0;PAIREDR=0;RO=24083;RPP=10024.4;RPPR=18510.8;RUN=1;SAP=10007;SRP=52211.8;TYPE=snp;XAI=2.70188e-05;XAM=0.0102998;XAS=0.0102727;XRI=3.80582e-05;XRM=0.0125966;XRS=0.0125585;technology.Illumina=1;B…	NON_SYNONYMOUS_CODING(MODERATE|MISSENSE|Ctc/Atc|L498I|1334|Jcr4S00316.10|protein_coding|CODING|Jcr4S00316.10|1|1);UPSTREAM(MODIFIER||2946||268|Jcr4S00316.20|protein_coding|CODING|Jcr4S00316.20||1)	C/C	C/A	C/C	C/C	C/C	C/C	C/C	C/C	C/C	C/C	C/C	C/C	C/C	C/C	C/C	C/C	C/C	C/C	C/C	C/C	C/C	C/C	C/C	C/C	C/C	C/C	C/C	C/C	C/A	C/C	C/C	C/A	C/C	C/C	C/C	C/C
Jcr4S00316	2691	Jcr4S00316_2691	GO:0015074;GO:0008270;GO:0003676	DNA integration	-	zinc ion binding; nucleic acid binding	-	-	-	C	G	AB=0.157861;ABP=28445.9;AC=95;AF=0.494792;AN=192;AO=4416;CIGAR=1X;DP=27979;DPRA=58.8926;EPP=9592.23;EPPR=51158.6;GTI=0;HWE=1042.78;LEN=1;MEANALT=1.05263;MQM=22.3141;MQMR=22.3679;NS=96;NUMALT=1;ODDS=0;PAIRED=0;PAIREDR=0;RO=23558;RPP=9592.23;RPPR=51158.6;RUN=1;SAP=9592.23;SRP=51158.6;TYPE=snp;XAI=3.50472e-05;XAM=0.0103955;XAS=0.0103604;XRI=4.31622e-05;XRM=0.0106242;XRS=0.010581;technology.Illumina=…	SYNONYMOUS_CODING(LOW|SILENT|ctC/ctG|L530|1334|Jcr4S00316.10|protein_coding|CODING|Jcr4S00316.10|1|1);UPSTREAM(MODIFIER||2848||268|Jcr4S00316.20|protein_coding|CODING|Jcr4S00316.20||1)	C/C	C/C	C/C	C/G	C/C	C/C	C/C	C/C	C/C	C/C	C/C	C/C	C/C	C/C	C/C	C/C	C/C	C/C	C/C	C/C	C/C	C/C	C/C	C/C	C/C	C/C	C/C	C/C	C/G	C/C	C/C	C/G	C/C	C/C	C/C	C/C
Jcr4S09560	2977	Jcr4S09560_2977	-	-	-	-	-	-	-	G	T	AB=0.116395;ABP=8952.62;AC=90;AF=0.473684;AN=190;AO=834;CIGAR=1X;DP=7361;DPRA=0;EPP=3.0103;EPPR=10.904;GTI=0;HWE=791.406;LEN=1;MEANALT=1.03158;MQM=0;MQMR=0;NS=95;NUMALT=1;ODDS=0;PAIRED=0;PAIREDR=0;RO=6524;RPP=1814.02;RPPR=6863.45;RUN=1;SAP=3.0103;SRP=62.2844;TYPE=snp;XAI=1.23612e-05;XAM=0.00082782;XAS=0.000815458;XRI=1.42219e-05;XRM=0.00339182;XRS=0.0033776;technology.Illumina=1;BVAR;SURRSEQ=GGCC…	DOWNSTREAM(MODIFIER||1859||217|Jcr4S09560.10|protein_coding|CODING|Jcr4S09560.10||1)	G/G	G/G	G/G	G/G	G/G	G/G	G/G	G/G	G/G	G/G	G/G	G/T	G/G	G/G	G/G	G/G	G/G	G/G	G/G	G/G	G/G	G/G	G/G	G/G	G/G	G/G	G/G	G/G	./.	G/G	G/G	./.	G/G	G/G	G/G	G/G
Jcr4S01382	3174	Jcr4S01382_3174	-	-	-	-	-	-	-	G	A	AB=0.124262;ABP=4157.6;AC=75;AF=0.390625;AN=192;AO=463;CIGAR=1X;DP=4297;DPRA=2.79658;EPP=1008.4;EPPR=7737.73;GTI=0;HWE=235.213;LEN=1;MEANALT=1.01075;MQM=0;MQMR=36.9744;NS=96;NUMALT=1;ODDS=0;PAIRED=0;PAIREDR=0;RO=3833;RPP=999.735;RPPR=7779.65;RUN=1;SAP=999.735;SRP=8282.89;TYPE=snp;XAI=0;XAM=0.000683438;XAS=0.000683438;XRI=8.06883e-06;XRM=0.00315747;XRS=0.0031494;technology.Illumina=1;BVAR;SURRSEQ=…	DOWNSTREAM(MODIFIER||2757||105|Jcr4S01382.10|protein_coding|CODING|Jcr4S01382.10||1);DOWNSTREAM(MODIFIER||425||417|Jcr4S01382.20|protein_coding|CODING|Jcr4S01382.20||1);INTERGENIC(MODIFIER||||||||||1);UPSTREAM(MODIFIER||651||572|Jcr4S01382.30|protein_coding|CODING|Jcr4S01382.30||1)	G/G	G/G	G/G	G/G	G/G	G/G	G/G	G/G	G/G	./.	G/G	G/G	G/G	G/G	G/G	G/A	G/G	./.	G/G	G/G	G/G	G/G	G/G	G/G	G/G	G/G	./.	G/G	G/G	G/A	G/G	G/G	G/G	G/G	G/G	G/G
Jcr4S08304	3185	Jcr4S08304_3185	-	-	-	-	-	-	-	C	T	AB=0.868714;ABP=5192.84;AC=113;AF=0.588542;AN=192;AO=4727;CIGAR=1X;DP=5340;DPRA=0;EPP=10267.6;EPPR=1295.26;GTI=0;HWE=345.748;LEN=1;MEANALT=1.02083;MQM=11.8839;MQMR=0.96563;NS=96;NUMALT=1;ODDS=0;PAIRED=0;PAIREDR=0;RO=611;RPP=3515.05;RPPR=1329.78;RUN=1;SAP=3515.05;SRP=1295.26;TYPE=snp;XAI=4.41499e-05;XAM=0.00841561;XAS=0.00837146;XRI=0;XRM=0.00636894;XRS=0.00636894;technology.Illumina=1;BVAR;SURRSE…	INTERGENIC(MODIFIER||||||||||1);UPSTREAM(MODIFIER||3789||2045|Jcr4S08304.10|protein_coding|CODING|Jcr4S08304.10||1)	T/T	T/T	T/T	T/T	T/T	T/T	T/T	T/T	T/T	T/T	T/T	T/T	T/T	T/T	T/T	T/T	T/T	T/T	T/T	T/T	T/T	T/T	T/T	T/T	T/T	T/T	./.	T/T	./.	T/T	T/T	./.	T/T	T/T	T/T	T/T
Jcr4S04771	3533	Jcr4S04771_3533	-	-	-	-	-	-	-	T	C	AB=0.851294;ABP=1783.45;AC=155;AF=0.807292;AN=192;AO=3553;CIGAR=1X;DP=3844;DPRA=0;EPP=7718.25;EPPR=3.0103;GTI=0;HWE=-295.586;LEN=1;MEANALT=1.01042;MQM=32.5747;MQMR=36.9517;NS=96;NUMALT=1;ODDS=0;PAIRED=0;PAIREDR=0;RO=290;RPP=1771.36;RPPR=632.737;RUN=1;SAP=1771.36;SRP=3.0103;TYPE=snp;XAI=2.0311e-05;XAM=0.00781717;XAS=0.00779686;XRI=0;XRM=0.00577248;XRS=0.00577248;technology.Illumina=1;BVAR;SURRSEQ=…	DOWNSTREAM(MODIFIER||2258||332|Jcr4S04771.30|protein_coding|CODING|Jcr4S04771.30||1);DOWNSTREAM(MODIFIER||2294||112|Jcr4S04771.10|protein_coding|CODING|Jcr4S04771.10||1);DOWNSTREAM(MODIFIER||4571||560|Jcr4S04771.40|protein_coding|CODING|Jcr4S04771.40||1);INTRON(MODIFIER||||352|Jcr4S04771.20|protein_coding|CODING|Jcr4S04771.20|2|1)	C/C	C/C	C/C	C/C	C/C	C/C	C/C	C/C	C/C	T/C	C/C	C/C	C/C	C/C	C/C	C/C	C/C	./.	C/C	C/C	C/C	C/C	C/C	C/C	C/C	C/C	./.	C/C	C/C	C/C	C/C	C/C	C/C	T/C	C/C	C/C
Jcr4S11205	3784	Jcr4S11205_3784	-	-	-	-	-	-	-	C	T	AB=0.152656;ABP=22429.8;AC=94;AF=0.489583;AN=192;AO=3280;CIGAR=1X;DP=21617;DPRA=227.537;EPP=21.6956;EPPR=131.608;GTI=0;HWE=972.993;LEN=1;MEANALT=1.02105;MQM=19.5835;MQMR=16.582;NS=96;NUMALT=1;ODDS=0;PAIRED=0;PAIREDR=0;RO=18334;RPP=7125.44;RPPR=38573.8;RUN=1;SAP=21.6956;SRP=88.5829;TYPE=snp;XAI=0;XAM=0.000880468;XAS=0.000880468;XRI=9.76082e-06;XRM=0.0150804;XRS=0.0150706;technology.Illumina=1;BVAR…	DOWNSTREAM(MODIFIER||1585||364|Jcr4S11205.30|protein_coding|CODING|Jcr4S11205.30||1);SYNONYMOUS_CODING(LOW|SILENT|ggC/ggT|G27|165|Jcr4S11205.20|protein_coding|CODING|Jcr4S11205.20|2|1);UPSTREAM(MODIFIER||1466||623|Jcr4S11205.10|protein_coding|CODING|Jcr4S11205.10||1);UPSTREAM(MODIFIER||3156||77|Jcr4S11205.40|protein_coding|CODING|Jcr4S11205.40||1)	C/C	C/C	C/C	C/C	C/C	C/C	C/C	C/C	C/C	C/T	C/C	C/C	C/T	C/C	C/C	C/C	C/C	C/T	C/C	C/C	C/C	C/C	C/C	C/C	C/C	C/C	C/C	C/C	C/C	C/C	C/C	C/C	C/C	C/C	C/C	C/T
Jcr4S05611	4070	Jcr4S05611_4070	GO:0003676	-	-	nucleic acid binding	-	-	-	C	T	AB=0.144591;ABP=17000.3;AC=94;AF=0.489583;AN=192;AO=2248;CIGAR=1X;DP=15652;DPRA=41.1789;EPP=4849.8;EPPR=29072.5;GTI=0;HWE=972.993;LEN=1;MEANALT=1.01053;MQM=0;MQMR=0;NS=96;NUMALT=1;ODDS=0;PAIRED=0;PAIREDR=0;RO=13403;RPP=4849.8;RPPR=29107.3;RUN=1;SAP=4884.48;SRP=29072.5;TYPE=snp;XAI=4.68252e-06;XAM=0.0103483;XAS=0.0103436;XRI=2.77146e-05;XRM=0.0106788;XRS=0.010651;technology.Illumina=1;BVAR;SURRSEQ…	DOWNSTREAM(MODIFIER||2544||453|Jcr4S05611.30|protein_coding|CODING|Jcr4S05611.30||1);NON_SYNONYMOUS_CODING(MODERATE|MISSENSE|gGa/gAa|G462E|1250|Jcr4S05611.20|protein_coding|CODING|Jcr4S05611.20|1|1);UPSTREAM(MODIFIER||3441||205|Jcr4S05611.10|protein_coding|CODING|Jcr4S05611.10||1)	C/C	C/T	C/C	C/C	C/C	C/C	C/T	C/C	C/C	C/C	C/C	C/C	C/C	C/C	C/C	C/C	C/C	C/C	C/C	C/C	C/C	C/C	C/C	C/C	C/C	C/C	C/C	C/C	C/T	C/C	C/C	C/T	C/C	C/C	C/C	C/T
Jcr4S03400	4832	Jcr4S03400_4832	-	-	-	-	-	-	-	C	T	AB=0.134052;ABP=8740.93;AC=93;AF=0.484375;AN=192;AO=1016;CIGAR=1X;DP=7703;DPRA=0;EPP=2209.23;EPPR=14523.6;GTI=0;HWE=911.165;LEN=1;MEANALT=1;MQM=0;MQMR=17.5662;NS=96;NUMALT=1;ODDS=0;PAIRED=0;PAIREDR=0;RO=6687;RPP=2209.23;RPPR=14523.6;RUN=1;SAP=2209.23;SRP=14523.6;TYPE=snp;XAI=0;XAM=0.0102625;XAS=0.0102625;XRI=6.18282e-06;XRM=0.00301809;XRS=0.00301191;technology.Illumina=1;BVAR;SURRSEQ=CTGTTATAAGTC…	DOWNSTREAM(MODIFIER||1257||396|Jcr4S03400.10|protein_coding|CODING|Jcr4S03400.10||1);INTERGENIC(MODIFIER||||||||||1);UPSTREAM(MODIFIER||1411||1926|Jcr4S03400.20|protein_coding|CODING|Jcr4S03400.20||1)	C/C	C/C	C/T	C/C	C/C	C/C	C/C	C/C	C/C	C/C	C/C	C/C	C/C	C/C	C/C	C/C	C/C	C/C	C/C	C/C	C/C	C/C	C/C	C/C	C/C	C/C	C/C	C/C	C/C	C/C	C/C	C/C	C/C	C/C	C/C	C/C
Jcr4S18540	5125	Jcr4S18540_5125	GO:0015074;GO:0008270;GO:0003676	DNA integration	-	nucleic acid binding; zinc ion binding	-	-	-	A	C	AB=0.122137;ABP=4551.96;AC=74;AF=0.385417;AN=192;AO=494;CIGAR=1X;DP=4819;DPRA=12.6711;EPP=566.38;EPPR=16.6625;GTI=0;HWE=209.83;LEN=1;MEANALT=1.31579;MQM=0;MQMR=36.9738;NS=96;NUMALT=1;ODDS=0;PAIRED=0;PAIREDR=0;RO=4278;RPP=1075.72;RPPR=9292.57;RUN=1;SAP=566.38;SRP=16.6625;TYPE=snp;XAI=2.2245e-05;XAM=0.00952226;XAS=0.00950002;XRI=1.99446e-05;XRM=0.00074256;XRS=0.000722616;technology.Illumina=1;BVAR;…	NON_SYNONYMOUS_CODING(MODERATE|MISSENSE|gAt/gCt|D1200A|1204|Jcr4S18540.10|protein_coding|CODING|Jcr4S18540.10|4|1)	A/A	A/A	A/A	A/A	A/A	A/A	./.	A/A	A/A	A/A	A/A	A/A	A/A	A/A	./.	A/A	A/A	A/A	A/A	A/A	A/C	A/A	A/A	A/A	A/A	A/A	A/A	A/A	A/A	A/A	A/A	./.	A/A	A/A	A/A	A/A
Jcr4U31076	5887	Jcr4U31076_5887	-	-	-	-	-	-	-	C	T	AB=0.126809;ABP=9780.97;AC=92;AF=0.479167;AN=192;AO=1037;CIGAR=1X;DP=8344;DPRA=21.9474;EPP=2254.83;EPPR=3.15419;GTI=0;HWE=854.765;LEN=1;MEANALT=1.03158;MQM=0.0443587;MQMR=8.03806;NS=96;NUMALT=1;ODDS=0;PAIRED=0;PAIREDR=0;RO=7304;RPP=2228.84;RPPR=15863.4;RUN=1;SAP=2228.84;SRP=3.15419;TYPE=snp;XAI=0;XAM=0.0102786;XAS=0.0102786;XRI=2.10633e-06;XRM=0.00626964;XRS=0.00626754;technology.Illumina=1;BVAR;…	INTERGENIC(MODIFIER||||||||||1);UPSTREAM(MODIFIER||2103||398|Jcr4U31076.10|protein_coding|CODING|Jcr4U31076.10||1)	C/C	C/C	C/C	C/C	C/C	C/C	C/C	C/C	C/C	C/C	C/C	C/C	C/C	C/C	C/T	C/C	C/C	C/C	C/T	C/C	C/C	C/C	C/C	C/C	C/C	C/C	C/C	C/C	C/C	C/C	C/T	C/C	C/C	C/C	C/C	C/C
Jcr4S07033	6931	Jcr4S07033_6931	GO:0015074;GO:0008270;GO:0003676	DNA integration	-	nucleic acid binding; zinc ion binding	-	-	-	C	T	AB=0.121697;ABP=7530.99;AC=87;AF=0.457895;AN=190;AO=759;CIGAR=1X;DP=6512;DPRA=4.06446;EPP=1651.16;EPPR=7.83164;GTI=0;HWE=653.168;LEN=1;MEANALT=1.02128;MQM=0.121212;MQMR=27.3643;NS=95;NUMALT=1;ODDS=0;PAIRED=0;PAIREDR=0;RO=5751;RPP=1633.83;RPPR=12387.1;RUN=1;SAP=1633.83;SRP=6.00112;TYPE=snp;XAI=0;XAM=0.0105349;XAS=0.0105349;XRI=1.52015e-05;XRM=0.000791963;XRS=0.000776762;technology.Illumina=1;BVAR;…	NON_SYNONYMOUS_CODING(MODERATE|MISSENSE|gGg/gAg|G251E|1238|Jcr4S07033.10|protein_coding|CODING|Jcr4S07033.10|1|1);UPSTREAM(MODIFIER||4085||350|Jcr4S07033.20|protein_coding|CODING|Jcr4S07033.20||1)	C/C	C/C	C/C	C/C	C/C	C/C	C/C	C/C	C/C	C/C	C/C	C/C	C/C	C/C	C/C	C/C	C/C	C/C	C/C	C/C	C/C	C/C	C/T	C/C	C/C	C/C	C/C	C/C	./.	C/C	C/C	C/C	C/C	C/C	C/C	C/C
Jcr4S03480	8277	Jcr4S03480_8277	-	-	-	-	-	-	-	G	A	AB=0.136919;ABP=10414.9;AC=93;AF=0.484375;AN=192;AO=1258;CIGAR=1X;DP=9324;DPRA=49.0632;EPP=130.716;EPPR=6.8231;GTI=0;HWE=911.165;LEN=1;MEANALT=1.01053;MQM=0;MQMR=0;NS=96;NUMALT=1;ODDS=0;PAIRED=0;PAIREDR=0;RO=8065;RPP=2734.72;RPPR=17515.9;RUN=1;SAP=130.716;SRP=6.8231;TYPE=snp;XAI=0;XAM=0.000883403;XAS=0.000883403;XRI=1.16194e-05;XRM=0.0136874;XRS=0.0136758;technology.Illumina=1;BVAR;SURRSEQ=CCAGAC…	DOWNSTREAM(MODIFIER||1318||555|Jcr4S03480.10|protein_coding|CODING|Jcr4S03480.10||1);INTERGENIC(MODIFIER||||||||||1);UPSTREAM(MODIFIER||1533||89|Jcr4S03480.20|protein_coding|CODING|Jcr4S03480.20||1)	G/G	G/G	G/G	G/G	G/G	G/G	G/G	G/G	G/G	G/G	G/G	G/G	G/G	G/G	G/G	G/G	G/G	G/A	G/G	G/G	G/G	G/G	G/G	G/G	G/G	G/G	G/G	G/G	G/G	G/G	G/G	G/G	G/G	G/G	G/G	G/G
Jcr4S04101	8439	Jcr4S04101_8439	-	-	-	-	-	-	-	T	C	AB=0.143744;ABP=12427;AC=94;AF=0.494737;AN=190;AO=1625;CIGAR=1X;DP=11346;DPRA=0;EPP=248.943;EPPR=51.747;GTI=0;HWE=1030.97;LEN=1;MEANALT=1.03158;MQM=0;MQMR=0;NS=95;NUMALT=1;ODDS=0;PAIRED=0;PAIREDR=0;RO=9717;RPP=3531.65;RPPR=20133.1;RUN=1;SAP=248.943;SRP=17.3145;TYPE=snp;XAI=0;XAM=0.00539285;XAS=0.00539285;XRI=4.36151e-06;XRM=0.00225729;XRS=0.00225293;technology.Illumina=1;BVAR;SURRSEQ=GAGAGGGCGAGC…	DOWNSTREAM(MODIFIER||4929||82|Jcr4S04101.30|protein_coding|CODING|Jcr4S04101.30||1);INTERGENIC(MODIFIER||||||||||1);UPSTREAM(MODIFIER||1495||133|Jcr4S04101.20|protein_coding|CODING|Jcr4S04101.20||1)	T/T	T/T	T/T	T/T	T/T	T/T	T/T	T/T	T/T	T/T	T/T	T/T	T/T	T/T	T/T	T/T	T/T	T/T	T/T	T/T	T/T	T/T	T/T	T/T	T/T	T/T	T/T	T/T	T/T	T/T	T/T	T/T	T/T	T/T	T/T	T/C
Jcr4S07241	11749	Jcr4S07241_11749	-	-	-	-	-	-	-	G	C	AB=0.140179;ABP=16617.5;AC=94;AF=0.489583;AN=192;AO=2083;CIGAR=1X;DP=14986;DPRA=52.5719;EPP=4.5959;EPPR=8.35365;GTI=0;HWE=972.993;LEN=1;MEANALT=1.15789;MQM=35.5386;MQMR=31.6257;NS=96;NUMALT=1;ODDS=0;PAIRED=0;PAIREDR=0;RO=12876;RPP=4379.73;RPPR=27504.4;RUN=1;SAP=3.03636;SRP=15.857;TYPE=snp;XAI=1.26924e-05;XAM=0.000926621;XAS=0.000913928;XRI=6.42195e-06;XRM=0.00572877;XRS=0.00572235;technology.Illu…	DOWNSTREAM(MODIFIER||2004||418|Jcr4S07241.20|protein_coding|CODING|Jcr4S07241.20||1);DOWNSTREAM(MODIFIER||3527||1427|Jcr4S07241.10|protein_coding|CODING|Jcr4S07241.10||1);SYNONYMOUS_CODING(LOW|SILENT|ggC/ggG|G30|73|Jcr4S07241.30|protein_coding|CODING|Jcr4S07241.30|1|1);UPSTREAM(MODIFIER||1381||1025|Jcr4S07241.40|protein_coding|CODING|Jcr4S07241.40||1)	G/G	G/C	G/G	G/G	G/G	G/G	G/G	G/G	G/G	G/G	G/G	G/C	G/G	G/G	G/C	G/G	G/G	G/G	G/G	G/G	G/G	G/G	G/G	G/G	G/G	G/G	G/G	G/G	G/G	G/G	G/G	G/G	G/G	G/G	G/G	G/G
Jcr4S16249	14465	Jcr4S16249_14465	-	-	-	-	-	-	-	G	A	AB=0.120641;ABP=3981.81;AC=80;AF=0.416667;AN=192;AO=410;CIGAR=1X;DP=3766;DPRA=2.39742;EPP=893.314;EPPR=266.385;GTI=0;HWE=375.859;LEN=1;MEANALT=1;MQM=0;MQMR=0;NS=96;NUMALT=1;ODDS=0;PAIRED=0;PAIREDR=0;RO=3356;RPP=893.314;RPPR=6887.95;RUN=1;SAP=893.314;SRP=194.493;TYPE=snp;XAI=0;XAM=0.000651944;XAS=0.000651944;XRI=0;XRM=0.00256793;XRS=0.00256793;technology.Illumina=1;BVAR;SURRSEQ=GATAGGTTCTATAGGCTAT…	DOWNSTREAM(MODIFIER||3781||108|Jcr4S16249.50|protein_coding|CODING|Jcr4S16249.50||1);UPSTREAM(MODIFIER||4805||209|Jcr4S16249.40|protein_coding|CODING|Jcr4S16249.40||1);UPSTREAM(MODIFIER||686||413|Jcr4S16249.60|protein_coding|CODING|Jcr4S16249.60||1)	G/G	G/A	G/G	G/G	G/G	G/G	G/G	G/G	G/G	./.	G/G	./.	G/G	G/G	G/G	G/G	G/G	G/G	G/G	G/G	G/G	G/G	G/G	G/G	G/G	G/G	G/G	G/G	./.	G/G	G/G	./.	G/G	G/G	./.	G/G
Jcr4S04209	494	Jcr4S04209_494	-	-	-	-	-	-	-	C	T	AB=0.126319;ABP=3680.44;AC=73;AF=0.384211;AN=190;AO=415;CIGAR=1X;DP=3998;DPRA=0.970234;EPP=904.171;EPPR=273.519;GTI=0;HWE=201.9;LEN=1;MEANALT=1.01087;MQM=0;MQMR=30.2264;NS=95;NUMALT=1;ODDS=0;PAIRED=0;PAIREDR=0;RO=3582;RPP=904.171;RPPR=7781.22;RUN=1;SAP=904.171;SRP=273.519;TYPE=snp;XAI=0;XAM=0.0104849;XAS=0.0104849;XRI=8.63424e-06;XRM=0.00423286;XRS=0.00422423;technology.Illumina=1;BVAR;SURRSEQ=TG…	DOWNSTREAM(MODIFIER||8||1367|Jcr4S04209.10|protein_coding|CODING|Jcr4S04209.10||1);INTERGENIC(MODIFIER||||||||||1)	C/C	C/C	C/C	C/C	C/C	C/C	C/C	C/C	C/C	C/C	C/C	C/C	./.	C/C	C/C	C/C	C/C	C/C	C/C	C/C	C/C	C/C	C/C	C/C	C/C	C/C	C/C	C/C	C/C	C/C	./.	./.	C/C	C/C	C/C	C/C
Jcr4S13573	585	Jcr4S13573_585	-	-	-	-	-	-	-	A	G	AB=0.142236;ABP=8702.44;AC=95;AF=0.494792;AN=192;AO=1113;CIGAR=1X;DP=7827;DPRA=41.1842;EPP=2419.86;EPPR=24.7092;GTI=0;HWE=1042.78;LEN=1;MEANALT=1.01053;MQM=0;MQMR=29.8621;NS=96;NUMALT=1;ODDS=0;PAIRED=0;PAIREDR=0;RO=6713;RPP=2419.86;RPPR=13665.5;RUN=1;SAP=2419.86;SRP=7.14072;TYPE=snp;XAI=3.63019e-05;XAM=0.000728767;XAS=0.000692465;XRI=1.0657e-05;XRM=0.000663464;XRS=0.000652807;technology.Illumina=…	INTRON(MODIFIER||||112|Jcr4S13573.10|protein_coding|CODING|Jcr4S13573.10|1|1);UPSTREAM(MODIFIER||1493||174|Jcr4S13573.20|protein_coding|CODING|Jcr4S13573.20||1)	A/A	A/A	A/A	A/A	A/A	A/A	A/G	A/A	A/A	A/A	A/G	A/G	A/G	A/A	A/A	A/A	A/A	A/A	A/A	A/A	A/A	A/A	A/A	A/A	A/A	A/A	A/A	A/A	A/A	A/A	A/A	A/A	A/A	A/A	A/A	A/A
Jcr4S13866	1055	Jcr4S13866_1055	-	-	-	-	-	-	-	T	C	AB=0.132471;ABP=3811.45;AC=74;AF=0.385417;AN=192;AO=465;CIGAR=1X;DP=4127;DPRA=21.7105;EPP=1012.74;EPPR=3.61751;GTI=0;HWE=209.83;LEN=1;MEANALT=1;MQM=0;MQMR=36.9164;NS=96;NUMALT=1;ODDS=0;PAIRED=0;PAIREDR=0;RO=3662;RPP=1012.74;RPPR=7825.19;RUN=1;SAP=1012.74;SRP=3.01267;TYPE=snp;XAI=0;XAM=0.0103426;XAS=0.0103426;XRI=8.44561e-06;XRM=0.0056881;XRS=0.00567965;technology.Illumina=1;BVAR;SURRSEQ=ACGTTATGT…	DOWNSTREAM(MODIFIER||1402||468|Jcr4S13866.10|protein_coding|CODING|Jcr4S13866.10||1);INTERGENIC(MODIFIER||||||||||1)	T/T	T/T	T/T	T/T	T/T	T/T	T/T	T/T	T/T	T/T	T/T	T/T	T/T	T/T	./.	T/T	T/T	T/T	T/T	T/T	T/T	T/T	T/T	T/T	T/T	T/T	./.	T/C	./.	T/T	T/T	T/T	T/T	T/T	T/T	T/T
Jcr4S12928	2496	Jcr4S12928_2496	-	-	-	-	-	-	-	T	C	AB=0.851973;ABP=19390.2;AC=98;AF=0.510417;AN=192;AO=15494;CIGAR=1X;DP=18170;DPRA=0;EPP=32511;EPPR=61.0103;GTI=0;HWE=972.993;LEN=1;MEANALT=1.0625;MQM=19.5707;MQMR=36.958;NS=96;NUMALT=1;ODDS=0;PAIRED=0;PAIREDR=0;RO=2669;RPP=33647.8;RPPR=5355.8;RUN=1;SAP=32511;SRP=29.0785;TYPE=snp;XAI=2.66149e-06;XAM=0.00427417;XAS=0.00427151;XRI=1.7535e-05;XRM=0.000797485;XRS=0.00077995;technology.Illumina=1;BVAR;S…	UPSTREAM(MODIFIER||677||106|Jcr4S12928.10|protein_coding|CODING|Jcr4S12928.10||1)	C/C	C/C	C/C	C/C	C/C	C/C	C/C	T/C	C/C	T/C	C/C	C/C	C/C	C/C	C/C	C/C	C/C	C/C	C/C	C/C	C/C	C/C	C/C	C/C	C/C	C/C	C/C	C/C	T/C	C/C	T/C	C/C	C/C	C/C	C/C	C/C
Jcr4S04366	3043	Jcr4S04366_3043	-	-	-	-	-	-	-	T	A	AB=0.126533;ABP=4053.01;AC=80;AF=0.416667;AN=192;AO=450;CIGAR=1X;DP=3949;DPRA=20.7737;EPP=980.173;EPPR=409.412;GTI=0;HWE=375.859;LEN=1;MEANALT=1.01053;MQM=21.8511;MQMR=35.8696;NS=96;NUMALT=1;ODDS=0;PAIRED=0;PAIREDR=0;RO=3497;RPP=980.173;RPPR=7596.65;RUN=1;SAP=980.173;SRP=409.412;TYPE=snp;XAI=0;XAM=0.0138721;XAS=0.0138721;XRI=2.94803e-06;XRM=0.00216183;XRS=0.00215888;technology.Illumina=1;BVAR;SUR…	DOWNSTREAM(MODIFIER||1572||1435|Jcr4S04366.30|protein_coding|CODING|Jcr4S04366.30||1);DOWNSTREAM(MODIFIER||2210||249|Jcr4S04366.10|protein_coding|CODING|Jcr4S04366.10||1);INTRON(MODIFIER||||129|Jcr4S04366.20|protein_coding|CODING|Jcr4S04366.20|2|1);SPLICE_SITE_DONOR(HIGH||||129|Jcr4S04366.20|protein_coding|CODING|Jcr4S04366.20|2|1)	T/T	T/T	T/T	T/T	T/T	T/T	T/T	T/T	T/T	T/T	T/T	T/T	T/T	T/T	T/T	T/T	T/T	./.	T/T	./.	T/T	T/T	T/T	T/T	T/T	T/T	T/T	T/T	T/T	T/T	T/T	./.	T/T	T/T	T/T	T/T
Jcr4S02965	3395	Jcr4S02965_3395	GO:0015074;GO:0003676	DNA integration	-	nucleic acid binding	-	-	-	G	A	AB=0.135103;ABP=8845.78;AC=93;AF=0.484375;AN=192;AO=1038;CIGAR=1X;DP=7783;DPRA=13.6439;EPP=2257;EPPR=14526.1;GTI=0;HWE=911.165;LEN=1;MEANALT=1.01053;MQM=0;MQMR=0.00252076;NS=96;NUMALT=1;ODDS=0;PAIRED=0;PAIREDR=0;RO=6744;RPP=2257;RPPR=14569.4;RUN=1;SAP=2257;SRP=14604;TYPE=snp;XAI=0;XAM=0.0101236;XAS=0.0101236;XRI=0.00187693;XRM=0.00732379;XRS=0.00544687;technology.Illumina=1;BVAR;SURRSEQ=GTGCGCCAG…	DOWNSTREAM(MODIFIER||3141||380|Jcr4S02965.20|protein_coding|CODING|Jcr4S02965.20||1);NON_SYNONYMOUS_CODING(MODERATE|MISSENSE|tCa/tTa|S311L|1054|Jcr4S02965.10|protein_coding|CODING|Jcr4S02965.10|3|1)	G/G	G/G	G/G	G/G	G/G	G/G	G/A	G/G	G/G	G/A	G/G	G/G	G/G	G/G	G/A	G/G	G/G	G/G	G/G	G/G	G/G	G/A	G/G	G/G	G/G	G/G	G/G	G/G	G/G	G/G	G/G	G/G	G/G	G/G	G/G	G/G
Jcr4S06837	4658	Jcr4S06837_4658	-	-	-	-	-	-	-	T	A	AB=0.135335;ABP=8119.57;AC=90;AF=0.46875;AN=192;AO=968;CIGAR=1X;DP=7358;DPRA=38.7158;EPP=2096.32;EPPR=5.24443;GTI=0;HWE=753.559;LEN=1;MEANALT=1.09474;MQM=0;MQMR=22.7414;NS=96;NUMALT=1;ODDS=0;PAIRED=0;PAIREDR=0;RO=6377;RPP=2105;RPPR=13815.8;RUN=1;SAP=2096.32;SRP=5.70753;TYPE=snp;XAI=0;XAM=0.0103347;XAS=0.0103347;XRI=9.76934e-06;XRM=0.000689244;XRS=0.000679475;technology.Illumina=1;BVAR;SURRSEQ=CAG…	DOWNSTREAM(MODIFIER||4960||124|Jcr4S06837.20|protein_coding|CODING|Jcr4S06837.20||1);INTERGENIC(MODIFIER||||||||||1);UPSTREAM(MODIFIER||2613||120|Jcr4S06837.10|protein_coding|CODING|Jcr4S06837.10||1)	T/T	T/T	T/T	T/T	T/T	T/T	T/T	T/T	T/T	./.	T/T	T/T	T/T	T/T	T/T	T/T	T/T	T/T	T/T	T/T	T/T	T/T	T/T	T/T	T/T	T/T	T/T	T/T	T/T	T/T	T/T	./.	T/T	T/T	T/T	T/T
Jcr4S04983	5597	Jcr4S04983_5597	GO:0015074;GO:0003676	DNA integration	-	nucleic acid binding	-	-	-	G	A	AB=0.14893;ABP=11611.9;AC=95;AF=0.494792;AN=192;AO=1615;CIGAR=1X;DP=10848;DPRA=28.5368;EPP=3509.94;EPPR=16601;GTI=0;HWE=1042.78;LEN=1;MEANALT=1.04211;MQM=0.108359;MQMR=0.296565;NS=96;NUMALT=1;ODDS=0;PAIRED=0;PAIREDR=0;RO=9229;RPP=3397.93;RPPR=19603;RUN=1;SAP=3397.93;SRP=17006.6;TYPE=snp;XAI=3.83007e-05;XAM=0.0102629;XAS=0.0102246;XRI=2.79612e-05;XRM=0.0106373;XRS=0.0106093;technology.Illumina=1;B…	NON_SYNONYMOUS_CODING(MODERATE|MISSENSE|Cgc/Tgc|R1484C|1793|Jcr4S04983.20|protein_coding|CODING|Jcr4S04983.20|7|1)	G/G	G/G	G/G	G/G	G/A	G/G	G/G	G/G	G/A	G/G	G/G	G/G	G/G	G/G	G/G	G/G	G/G	G/G	G/G	G/G	G/G	G/A	G/G	G/G	G/G	G/G	G/G	G/G	G/G	G/G	G/G	G/A	G/G	G/G	G/G	G/G
Jcr4S04983	5609	Jcr4S04983_5609	GO:0015074;GO:0003676	DNA integration	-	nucleic acid binding	-	-	-	C	T	AB=0.147155;ABP=11900.5;AC=95;AF=0.494792;AN=192;AO=1619;CIGAR=1X;DP=11006;DPRA=28.9526;EPP=3518.62;EPPR=17618.9;GTI=0;HWE=1042.78;LEN=1;MEANALT=1.01053;MQM=0;MQMR=0.290539;NS=96;NUMALT=1;ODDS=0;PAIRED=0;PAIREDR=0;RO=9386;RPP=3518.62;RPPR=20211.1;RUN=1;SAP=3518.62;SRP=17764.5;TYPE=snp;XAI=3.82061e-05;XAM=0.0102973;XAS=0.0102591;XRI=3.17961e-05;XRM=0.0106264;XRS=0.0105946;technology.Illumina=1;BVA…	NON_SYNONYMOUS_CODING(MODERATE|MISSENSE|Gat/Aat|D1480N|1793|Jcr4S04983.20|protein_coding|CODING|Jcr4S04983.20|7|1)	C/C	C/C	C/C	C/C	C/T	C/C	C/C	C/C	C/T	C/C	C/C	C/C	C/C	C/C	C/C	C/C	C/C	C/C	C/C	C/C	C/C	C/T	C/C	C/C	C/C	C/C	C/C	C/C	C/C	C/C	C/C	C/T	C/C	C/C	C/C	C/C
Jcr4S02446	8401	Jcr4S02446_8401	-	-	-	-	-	-	-	T	A	AB=0.135538;ABP=9979.63;AC=93;AF=0.484375;AN=192;AO=1184;CIGAR=1X;DP=8887;DPRA=93.5368;EPP=2574.03;EPPR=2153.8;GTI=0;HWE=911.165;LEN=1;MEANALT=1.01053;MQM=0.0945946;MQMR=14.8191;NS=96;NUMALT=1;ODDS=0;PAIRED=0;PAIREDR=0;RO=7702;RPP=2565.36;RPPR=16640.9;RUN=1;SAP=2565.36;SRP=2122.77;TYPE=snp;XAI=0;XAM=0.0103339;XAS=0.0103339;XRI=2.94144e-06;XRM=0.00770297;XRS=0.00770003;technology.Illumina=1;BVAR;S…	DOWNSTREAM(MODIFIER||4765||197|Jcr4S02446.10|protein_coding|CODING|Jcr4S02446.10||1);INTERGENIC(MODIFIER||||||||||1);UPSTREAM(MODIFIER||724||176|Jcr4S02446.20|protein_coding|CODING|Jcr4S02446.20||1)	T/T	T/T	T/T	T/T	T/T	T/T	T/T	T/T	T/T	T/T	T/T	T/T	T/T	T/T	T/A	T/T	T/T	T/T	T/T	T/T	T/T	T/T	T/T	T/T	T/T	T/T	T/T	T/T	T/T	T/T	T/T	./.	T/T	T/T	T/T	T/T
Jcr4S01269	16256	Jcr4S01269_16256	-	-	-	-	-	-	-	T	C	AB=0.144566;ABP=12572.8;AC=94;AF=0.489583;AN=192;AO=1658;CIGAR=1X;DP=11511;DPRA=121.158;EPP=314.906;EPPR=80.5091;GTI=0;HWE=972.993;LEN=1;MEANALT=1;MQM=0;MQMR=0;NS=96;NUMALT=1;ODDS=0;PAIRED=0;PAIREDR=0;RO=9853;RPP=3603.31;RPPR=20292.7;RUN=1;SAP=314.906;SRP=28.3374;TYPE=snp;XAI=6.2179e-06;XAM=0.0055482;XAS=0.00554198;XRI=7.58267e-06;XRM=0.00226221;XRS=0.00225462;technology.Illumina=1;BVAR;SURRSEQ=G…	DOWNSTREAM(MODIFIER||4427||130|Jcr4S01269.40|protein_coding|CODING|Jcr4S01269.40||1);INTERGENIC(MODIFIER||||||||||1);UPSTREAM(MODIFIER||2665||282|Jcr4S01269.50|protein_coding|CODING|Jcr4S01269.50||1)	T/T	T/T	T/T	T/T	T/C	T/T	T/T	T/T	T/T	T/T	T/T	T/T	T/T	T/T	T/T	T/T	T/T	T/T	T/T	T/T	T/T	T/T	T/T	T/T	T/T	T/T	T/T	T/T	T/T	T/C	T/T	T/T	T/C	T/T	T/T	T/T
Jcr4S01144	18456	Jcr4S01144_18456	-	-	-	-	-	-	-	A	ACTCT	AB=0.14393;ABP=4402.5;AC=88;AF=0.458333;AN=192;AO=587;CIGAR=1M4I;DP=4230;DPRA=22.2526;EPP=1277.66;EPPR=6772.11;GTI=0;HWE=663.709;LEN=4;MEANALT=1.98947;MQM=37;MQMR=37;NS=96;NUMALT=1;ODDS=0;PAIRED=0;PAIREDR=0;RO=3426;RPP=1277.66;RPPR=7442.47;RUN=1;SAP=1277.66;SRP=6772.11;TYPE=ins;XAI=0;XAM=0.000426396;XAS=0.000426396;XRI=5.30595e-05;XRM=0.000630964;XRS=0.000577905;technology.Illumina=1;BVAR;SURRSEQ…	DOWNSTREAM(MODIFIER||3194||807|Jcr4S01144.50|protein_coding|CODING|Jcr4S01144.50||1);INTERGENIC(MODIFIER||||||||||1);UPSTREAM(MODIFIER||388||246|Jcr4S01144.40|protein_coding|CODING|Jcr4S01144.40||1)	A/A	A/ACTCT	A/A	A/A	A/A	./.	A/A	A/A	A/ACTCT	./.	A/A	A/A	A/A	A/A	A/A	A/A	A/A	A/A	A/A	A/A	A/A	A/A	A/A	A/A	A/A	A/A	A/A	A/A	./.	A/A	A/A	A/A	A/A	A/A	A/A	A/A
Jcr4S02031	24029	Jcr4S02031_24029	-	-	-	-	-	-	-	T	C	AB=0.126853;ABP=2777.41;AC=75;AF=0.394737;AN=190;AO=313;CIGAR=1X;DP=2872;DPRA=1.37814;EPP=674.023;EPPR=4835.76;GTI=0;HWE=253.145;LEN=1;MEANALT=1.01064;MQM=36.246;MQMR=36.957;NS=95;NUMALT=1;ODDS=0;PAIRED=0;PAIREDR=0;RO=2558;RPP=682.681;RPPR=4843.87;RUN=1;SAP=674.023;SRP=5548.95;TYPE=snp;XAI=3.2937e-05;XAM=0.0104373;XAS=0.0104044;XRI=1.18464e-05;XRM=0.000888088;XRS=0.000876242;technology.Illumina=1…	DOWNSTREAM(MODIFIER||1319||117|Jcr4S02031.80|protein_coding|CODING|Jcr4S02031.80||1);UPSTREAM(MODIFIER||3827||203|Jcr4S02031.70|protein_coding|CODING|Jcr4S02031.70||1)	T/T	T/T	./.	T/T	T/T	T/T	T/T	T/T	T/T	./.	T/T	T/T	T/T	T/T	T/T	T/T	T/T	./.	./.	T/T	T/T	T/T	T/T	./.	T/T	T/T	./.	T/T	./.	T/T	T/T	T/T	T/T	T/T	./.	./.
Jcr4S15916	1063	Jcr4S15916_1063	-	-	-	-	-	-	-	G	A	AB=0.124624;ABP=7731.97;AC=93;AF=0.484375;AN=192;AO=807;CIGAR=1X;DP=6678;DPRA=0;EPP=1755.39;EPPR=201.938;GTI=0;HWE=1157.81;LEN=1;MEANALT=1.04167;MQM=0;MQMR=34.7734;NS=96;NUMALT=1;ODDS=0;PAIRED=0;PAIREDR=0;RO=5865;RPP=1755.39;RPPR=12053.3;RUN=1;SAP=1755.39;SRP=124.572;TYPE=snp;XAI=0;XAM=0.0125376;XAS=0.0125376;XRI=5.58465e-05;XRM=0.0011252;XRS=0.00106935;technology.Illumina=1;BVAR;SURRSEQ=AATAAAAA…	INTERGENIC(MODIFIER||||||||||1);UPSTREAM(MODIFIER||2024||1025|Jcr4S15916.10|protein_coding|CODING|Jcr4S15916.10||1)	G/G	G/G	G/G	G/G	G/G	G/G	G/A	G/G	G/G	G/G	G/G	G/G	G/G	G/G	G/G	G/G	G/G	G/G	G/G	G/G	G/G	G/A	G/G	G/G	G/G	G/G	G/G	G/G	G/G	G/G	G/A	G/G	G/G	G/G	G/A	G/G
Jcr4S07977	1476	Jcr4S07977_1476	GO:0015074;GO:0003676	DNA integration	-	nucleic acid binding	-	-	-	A	T	AB=0.86713;ABP=7589.28;AC=111;AF=0.578125;AN=192;AO=6516;CIGAR=1X;DP=7421;DPRA=0;EPP=14152.3;EPPR=3.70992;GTI=0;HWE=407.07;LEN=1;MEANALT=1.04167;MQM=36.9982;MQMR=37;NS=96;NUMALT=1;ODDS=0;PAIRED=0;PAIREDR=0;RO=897;RPP=7.65051;RPPR=1907.63;RUN=1;SAP=7.65051;SRP=4.77508;TYPE=snp;XAI=3.5005e-06;XAM=0.00568185;XAS=0.00567834;XRI=0;XRM=0.0171589;XRS=0.0171589;technology.Illumina=1;BVAR;SURRSEQ=CCAGAAAG…	NON_SYNONYMOUS_CODING(MODERATE|MISSENSE|Aca/Tca|T346S|813|Jcr4S07977.10|protein_coding|CODING|Jcr4S07977.10|3|1)	T/T	A/T	T/T	T/T	T/T	T/T	T/T	T/T	T/T	T/T	T/T	T/T	T/T	T/T	T/T	A/T	T/T	T/T	T/T	T/T	T/T	T/T	T/T	T/T	T/T	A/T	T/T	T/T	A/T	T/T	T/T	A/T	T/T	T/T	T/T	T/T
Jcr4S07977	1482	Jcr4S07977_1482	GO:0015074;GO:0003676	DNA integration	-	nucleic acid binding	-	-	-	A	C	AB=0.136273;ABP=6909.23;AC=75;AF=0.390625;AN=192;AO=892;CIGAR=1X;DP=7481;DPRA=2.66703;EPP=10.6445;EPPR=11.5554;GTI=0;HWE=235.213;LEN=1;MEANALT=1.02174;MQM=37;MQMR=37;NS=96;NUMALT=1;ODDS=0;PAIRED=0;PAIREDR=0;RO=6587;RPP=1561.02;RPPR=14072.9;RUN=1;SAP=6.16526;SRP=18.2488;TYPE=snp;XAI=0;XAM=0.00394436;XAS=0.00394436;XRI=3.46277e-06;XRM=0.0159537;XRS=0.0159502;technology.Illumina=1;BVAR;SURRSEQ=AGGTG…	NON_SYNONYMOUS_CODING(MODERATE|MISSENSE|Agc/Cgc|S348R|813|Jcr4S07977.10|protein_coding|CODING|Jcr4S07977.10|3|1)	A/A	A/C	A/A	A/A	A/A	A/A	A/A	A/A	A/A	A/A	A/A	A/A	A/A	A/A	A/A	A/C	A/A	A/A	A/A	A/A	A/A	A/A	A/A	A/A	A/A	A/C	A/A	A/A	A/C	A/A	A/A	A/C	A/A	A/A	A/A	A/A
Jcr4S12529	2426	Jcr4S12529_2426	-	-	-	-	-	-	-	G	A	AB=0.139159;ABP=11754.8;AC=92;AF=0.484211;AN=190;AO=1461;CIGAR=1X;DP=10665;DPRA=0;EPP=3.34472;EPPR=229.595;GTI=0;HWE=899.713;LEN=1;MEANALT=1;MQM=0.227926;MQMR=22.9704;NS=95;NUMALT=1;ODDS=0;PAIRED=0;PAIREDR=0;RO=9204;RPP=3175.53;RPPR=19989.2;RUN=1;SAP=3.34472;SRP=229.595;TYPE=snp;XAI=2.86823e-05;XAM=0.0107681;XAS=0.0107395;XRI=0.00350707;XRM=0.0138085;XRS=0.0103014;technology.Illumina=1;BVAR;SURRS…	DOWNSTREAM(MODIFIER||31||414|Jcr4S12529.10|protein_coding|CODING|Jcr4S12529.10||1)	G/G	G/G	G/G	G/G	G/A	G/G	G/G	G/G	G/G	G/A	G/G	G/G	G/G	G/G	G/G	G/G	G/G	G/G	G/G	G/G	G/G	G/G	G/G	G/G	G/G	G/G	G/A	G/G	G/G	G/G	G/G	G/G	G/G	G/G	G/G	G/G
Jcr4S00120	5317	Jcr4S00120_5317	GO:0015074;GO:0003676	DNA integration	-	nucleic acid binding	-	-	-	C	A	AB=0.858211;ABP=5371.69;AC=102;AF=0.53125;AN=192;AO=4423;CIGAR=1X;DP=5123;DPRA=0;EPP=9598.75;EPPR=5.99569;GTI=0;HWE=753.559;LEN=1;MEANALT=1.01042;MQM=37;MQMR=37;NS=96;NUMALT=1;ODDS=0;PAIRED=0;PAIREDR=0;RO=699;RPP=9598.75;RPPR=5.99569;RUN=1;SAP=9590.07;SRP=1520.87;TYPE=snp;XAI=5.38612e-06;XAM=0.0104429;XAS=0.0104375;XRI=0;XRM=0.0157076;XRS=0.0157076;technology.Illumina=1;BVAR;SURRSEQ=AAAACCATCGGTT…	NON_SYNONYMOUS_CODING(MODERATE|MISSENSE|aGg/aTg|R361M|1550|Jcr4S00120.20|protein_coding|CODING|Jcr4S00120.20|1|1);UPSTREAM(MODIFIER||2654||63|Jcr4S00120.30|protein_coding|CODING|Jcr4S00120.30||1)	A/A	C/A	A/A	A/A	A/A	C/A	A/A	A/A	A/A	A/A	A/A	A/A	A/A	A/A	A/A	A/A	A/A	A/A	A/A	A/A	A/A	./.	A/A	A/A	A/A	A/A	A/A	A/A	./.	A/A	C/A	A/A	A/A	A/A	A/A	A/A
Jcr4U29081	5837	Jcr4U29081_5837	GO:0015074;GO:0008270;GO:0003676	DNA integration	-	zinc ion binding; nucleic acid binding	-	-	-	C	T	AB=0.137078;ABP=6337.56;AC=93;AF=0.484375;AN=192;AO=764;CIGAR=1X;DP=5623;DPRA=59.1789;EPP=1662.02;EPPR=1680.44;GTI=0;HWE=911.165;LEN=1;MEANALT=1.01053;MQM=0;MQMR=0;NS=96;NUMALT=1;ODDS=0;PAIRED=0;PAIREDR=0;RO=4857;RPP=1662.02;RPPR=10523.8;RUN=1;SAP=1662.02;SRP=1670.07;TYPE=snp;XAI=0;XAM=0.000648496;XAS=0.000648496;XRI=0.000634191;XRM=0.0108467;XRS=0.0102125;technology.Illumina=1;BVAR;SURRSEQ=CGCAG…	SYNONYMOUS_CODING(LOW|SILENT|atC/atT|I1319|1640|Jcr4U29081.10|protein_coding|CODING|Jcr4U29081.10|4|1)	C/C	C/C	C/T	C/C	C/C	C/C	C/C	C/C	C/C	./.	C/C	C/C	C/C	C/C	C/T	C/C	C/C	C/C	C/C	C/C	C/C	C/C	C/C	C/C	C/C	C/C	C/C	C/C	./.	C/C	C/C	C/C	C/C	C/C	C/C	C/C
Jcr4S28176	5940	Jcr4S28176_5940	GO:0004523;GO:0003676	-	-	nucleic acid binding; ribonuclease H activity	EC:3.1.26.4	-	-	C	T	AB=0.131572;ABP=4286.38;AC=87;AF=0.453125;AN=192;AO=491;CIGAR=1X;DP=3963;DPRA=0;EPP=1069.2;EPPR=7165.03;GTI=0;HWE=622.118;LEN=1;MEANALT=1;MQM=0.1222;MQMR=13.3108;NS=96;NUMALT=1;ODDS=0;PAIRED=0;PAIREDR=0;RO=3472;RPP=1069.2;RPPR=7165.03;RUN=1;SAP=1069.2;SRP=7542.36;TYPE=snp;XAI=0;XAM=0.0104679;XAS=0.0104679;XRI=3.62621e-05;XRM=0.00415332;XRS=0.00411706;technology.Illumina=1;BVAR;SURRSEQ=TGGTCCACACA…	DOWNSTREAM(MODIFIER||1554||427|Jcr4S28176.20|protein_coding|CODING|Jcr4S28176.20||1);DOWNSTREAM(MODIFIER||3368||516|Jcr4S28176.30|protein_coding|CODING|Jcr4S28176.30||1);NON_SYNONYMOUS_CODING(MODERATE|MISSENSE|Cgg/Tgg|R1188W|1302|Jcr4S28176.10|protein_coding|CODING|Jcr4S28176.10|5|1|WARNING_TRANSCRIPT_NO_START_CODON)	C/C	C/C	C/C	C/C	C/C	C/C	C/C	C/C	C/C	./.	C/C	C/C	C/C	C/C	C/C	C/C	C/C	C/C	C/C	C/C	C/C	C/C	C/C	./.	C/T	C/C	C/C	C/C	C/C	C/C	C/C	C/C	./.	C/C	C/C	C/C
Jcr4S20682	6262	Jcr4S20682_6262	-	-	-	-	-	-	-	C	T	AB=0.115607;ABP=3777.52;AC=75;AF=0.390625;AN=192;AO=372;CIGAR=1X;DP=3721;DPRA=2.48438;EPP=810.798;EPPR=131.485;GTI=0;HWE=235.213;LEN=1;MEANALT=1.02174;MQM=0;MQMR=0;NS=96;NUMALT=1;ODDS=0;PAIRED=0;PAIREDR=0;RO=3347;RPP=810.798;RPPR=7227.56;RUN=1;SAP=810.798;SRP=137.324;TYPE=snp;XAI=0;XAM=0.00050473;XAS=0.00050473;XRI=6.16031e-06;XRM=0.00261821;XRS=0.00261205;technology.Illumina=1;BVAR;SURRSEQ=CAAGG…	DOWNSTREAM(MODIFIER||3576||97|Jcr4S20682.30|protein_coding|CODING|Jcr4S20682.30||1);INTERGENIC(MODIFIER||||||||||1);UPSTREAM(MODIFIER||2403||541|Jcr4S20682.10|protein_coding|CODING|Jcr4S20682.10||1);UPSTREAM(MODIFIER||4641||124|Jcr4S20682.40|protein_coding|CODING|Jcr4S20682.40||1);UPSTREAM(MODIFIER||890||267|Jcr4S20682.20|protein_coding|CODING|Jcr4S20682.20||1)	C/C	C/C	./.	C/C	C/C	C/C	C/C	C/C	C/C	./.	C/C	C/C	C/C	C/C	C/C	C/C	C/C	C/C	C/C	C/C	C/C	C/C	C/C	C/C	C/C	./.	./.	C/C	./.	C/C	C/C	C/C	C/C	C/C	C/C	C/C
Jcr4S02791	7072	Jcr4S02791_7072	GO:0015074;GO:0008270;GO:0003676	DNA integration	-	nucleic acid binding; zinc ion binding	-	-	-	C	T	AB=0.135764;ABP=3321.75;AC=85;AF=0.442708;AN=192;AO=404;CIGAR=1X;DP=3200;DPRA=1.7475;EPP=880.285;EPPR=6074.45;GTI=0;HWE=544.451;LEN=1;MEANALT=1;MQM=0;MQMR=0;NS=96;NUMALT=1;ODDS=0;PAIRED=0;PAIREDR=0;RO=2796;RPP=880.285;RPPR=6074.45;RUN=1;SAP=880.285;SRP=6074.45;TYPE=snp;XAI=2.57838e-05;XAM=0.000563142;XAS=0.000537358;XRI=0;XRM=0.00277065;XRS=0.00277065;technology.Illumina=1;BVAR;SURRSEQ=AGAATTGGAA…	NON_SYNONYMOUS_CODING(MODERATE|MISSENSE|Cgt/Tgt|R326C|1221|Jcr4S02791.30|protein_coding|CODING|Jcr4S02791.30|1|1);UPSTREAM(MODIFIER||2507||280|Jcr4S02791.20|protein_coding|CODING|Jcr4S02791.20||1)	C/C	C/C	C/C	C/C	C/C	C/C	C/C	C/C	C/C	./.	C/C	C/C	C/C	C/C	C/C	C/C	C/C	C/C	C/C	C/C	C/C	./.	C/C	C/C	C/C	C/C	C/C	C/C	./.	./.	C/C	C/C	C/C	C/C	C/C	C/C
Jcr4S07271	8207	Jcr4S07271_8207	-	-	-	-	-	-	-	C	T	AB=0.138294;ABP=6691.77;AC=90;AF=0.46875;AN=192;AO=825;CIGAR=1X;DP=6102;DPRA=32.1053;EPP=1794.48;EPPR=364.292;GTI=0;HWE=753.559;LEN=1;MEANALT=1;MQM=0;MQMR=7.93254;NS=96;NUMALT=1;ODDS=0;PAIRED=0;PAIREDR=0;RO=5277;RPP=1794.48;RPPR=11254.4;RUN=1;SAP=1794.48;SRP=328.225;TYPE=snp;XAI=0.0102847;XAM=0.0110468;XAS=0.000762137;XRI=9.76812e-06;XRM=0.0116233;XRS=0.0116135;technology.Illumina=1;BVAR;SURRSEQ=…	DOWNSTREAM(MODIFIER||1453||157|Jcr4S07271.20|protein_coding|CODING|Jcr4S07271.20||1);INTERGENIC(MODIFIER||||||||||1)	C/C	C/T	C/T	C/C	C/C	C/C	C/C	C/C	C/C	C/C	C/C	C/C	C/C	C/C	C/C	C/C	C/C	C/C	C/C	C/C	C/C	C/C	C/C	C/C	C/C	C/C	C/C	C/C	./.	C/C	C/C	./.	C/C	C/C	C/C	C/C
Jcr4S10067	13566	Jcr4S10067_13566	GO:0015074;GO:0008270;GO:0003676	DNA integration	-	zinc ion binding; nucleic acid binding	-	-	-	A	G	AB=0.149403;ABP=12423.1;AC=94;AF=0.489583;AN=192;AO=1744;CIGAR=1X;DP=11740;DPRA=123.568;EPP=3790.06;EPPR=1635.6;GTI=0;HWE=972.993;LEN=1;MEANALT=1.03158;MQM=0.0212156;MQMR=35.2219;NS=96;NUMALT=1;ODDS=0;PAIRED=0;PAIREDR=0;RO=9993;RPP=1713.27;RPPR=21659.1;RUN=1;SAP=1713.27;SRP=1647.53;TYPE=snp;XAI=1.2502e-05;XAM=0.000641639;XAS=0.000629137;XRI=5.15825e-06;XRM=0.00468039;XRS=0.00467523;technology.Ill…	NON_SYNONYMOUS_CODING(MODERATE|MISSENSE|Tgg/Cgg|W488R|928|Jcr4S10067.30|protein_coding|CODING|Jcr4S10067.30|5|1)	A/A	A/A	A/A	A/G	A/A	A/A	A/A	A/A	A/G	A/G	A/A	A/A	A/G	A/A	A/A	A/A	A/A	A/A	A/G	A/A	A/A	A/G	A/A	A/A	A/A	A/A	A/G	A/A	A/A	A/A	A/A	A/A	A/A	A/A	A/A	A/A
Jcr4S01583	14514	Jcr4S01583_14514	-	-	-	-	-	-	-	G	A	AB=0.141503;ABP=10369.1;AC=95;AF=0.494792;AN=192;AO=1317;CIGAR=1X;DP=9363;DPRA=0;EPP=177.165;EPPR=3.04916;GTI=0;HWE=1042.78;LEN=1;MEANALT=1;MQM=0;MQMR=0;NS=96;NUMALT=1;ODDS=0;PAIRED=0;PAIREDR=0;RO=8046;RPP=2862.84;RPPR=17474.7;RUN=1;SAP=177.165;SRP=3.04916;TYPE=snp;XAI=3.13114e-05;XAM=0.00087412;XAS=0.000842809;XRI=1.41076e-05;XRM=0.0135913;XRS=0.0135772;technology.Illumina=1;BVAR;SURRSEQ=CCAGACT…	DOWNSTREAM(MODIFIER||2087||1576|Jcr4S01583.20|protein_coding|CODING|Jcr4S01583.20||1);INTERGENIC(MODIFIER||||||||||1);UPSTREAM(MODIFIER||1494||223|Jcr4S01583.30|protein_coding|CODING|Jcr4S01583.30||1)	G/G	G/G	G/G	G/G	G/G	G/G	G/G	G/G	G/A	G/G	G/G	G/G	G/G	G/G	G/G	G/G	G/G	G/G	G/G	G/A	G/G	G/G	G/A	G/G	G/G	G/G	G/G	G/A	G/G	G/G	G/G	G/G	G/G	G/G	G/G	G/G
Jcr4U29020	1162	Jcr4U29020_1162	-	-	-	-	-	-	-	C	A	AB=0.164674;ABP=31532;AC=97;AF=0.505208;AN=192;AO=5318;CIGAR=1X;DP=32284;DPRA=0;EPP=13.2037;EPPR=103.913;GTI=0;HWE=1042.78;LEN=1;MEANALT=1.10417;MQM=36.7945;MQMR=36.5984;NS=96;NUMALT=1;ODDS=0;PAIRED=0;PAIREDR=0;RO=26947;RPP=11334.8;RPPR=58517.7;RUN=1;SAP=20.6761;SRP=103.913;TYPE=snp;XAI=3.11184e-05;XAM=0.0102301;XAS=0.010199;XRI=2.98416e-05;XRM=0.00463318;XRS=0.00460334;technology.Illumina=1;BVAR…	DOWNSTREAM(MODIFIER||4930||48|Jcr4U29020.20|protein_coding|CODING|Jcr4U29020.20||1);INTERGENIC(MODIFIER||||||||||1);UPSTREAM(MODIFIER||2946||405|Jcr4U29020.10|protein_coding|CODING|Jcr4U29020.10||1)	C/C	C/C	C/C	C/C	C/C	C/C	C/A	C/C	C/C	C/C	C/C	C/C	C/C	C/C	C/C	C/C	C/C	C/C	C/C	C/C	C/A	C/C	C/C	C/C	C/C	C/C	C/C	C/C	C/C	C/C	C/C	C/C	C/C	C/C	C/C	C/C
Jcr4U30795	2023	Jcr4U30795_2023	GO:0003676	-	-	nucleic acid binding	-	-	-	G	A	AB=0.140968;ABP=5253.02;AC=91;AF=0.478947;AN=190;AO=665;CIGAR=1X;DP=4816;DPRA=2.23001;EPP=1438.37;EPPR=8984.24;GTI=0;HWE=843.495;LEN=1;MEANALT=1.03226;MQM=0;MQMR=0;NS=95;NUMALT=1;ODDS=0;PAIRED=0;PAIREDR=0;RO=4148;RPP=1447.04;RPPR=9010.28;RUN=1;SAP=1438.37;SRP=8984.24;TYPE=snp;XAI=0;XAM=0.00072471;XAS=0.00072471;XRI=7.45608e-06;XRM=0.00268436;XRS=0.00267691;technology.Illumina=1;BVAR;SURRSEQ=CTCCG…	NON_SYNONYMOUS_CODING(MODERATE|MISSENSE|aCt/aTt|T20I|129|Jcr4U30795.10|protein_coding|CODING|Jcr4U30795.10|1|1|WARNING_TRANSCRIPT_MULTIPLE_STOP_CODONS)	G/G	G/G	G/G	G/A	G/G	G/A	G/G	G/G	G/G	G/G	G/G	G/G	G/G	G/G	G/G	G/G	G/G	G/G	G/G	G/G	G/G	G/G	G/G	G/G	G/G	G/G	G/G	G/G	G/G	G/G	G/A	G/G	G/G	G/G	G/G	G/G
Jcr4S02566	3953	Jcr4S02566_3953	-	-	-	-	-	-	-	C	T	AB=0.129454;ABP=9307.76;AC=87;AF=0.457895;AN=190;AO=1041;CIGAR=1X;DP=8464;DPRA=0;EPP=6.86722;EPPR=13.1321;GTI=0;HWE=653.168;LEN=1;MEANALT=1.01053;MQM=14.9808;MQMR=21.1937;NS=95;NUMALT=1;ODDS=0;PAIRED=0;PAIREDR=0;RO=7422;RPP=1945.5;RPPR=16102.3;RUN=1;SAP=4.31402;SRP=12.7015;TYPE=snp;XAI=0;XAM=0.012319;XAS=0.012319;XRI=5.07387e-06;XRM=0.0143371;XRS=0.014332;technology.Illumina=1;BVAR;SURRSEQ=GTAATC…	INTERGENIC(MODIFIER||||||||||1);UPSTREAM(MODIFIER||1764||47|Jcr4S02566.10|protein_coding|CODING|Jcr4S02566.10||1)	C/C	C/C	C/C	C/C	C/C	C/C	C/C	C/C	C/T	C/C	C/C	C/C	C/C	C/C	C/C	C/C	C/C	C/C	C/C	C/C	C/C	C/C	C/C	C/C	C/C	C/C	C/C	C/C	C/C	C/C	C/C	C/C	C/C	C/C	C/C	C/C
Jcr4S19665	4220	Jcr4S19665_4220	GO:0015074;GO:0008270;GO:0003676	DNA integration	-	nucleic acid binding; zinc ion binding	-	-	-	G	A	AB=0.135822;ABP=3582.18;AC=85;AF=0.447368;AN=190;AO=433;CIGAR=1X;DP=3421;DPRA=0.798109;EPP=943.258;EPPR=5854.11;GTI=0;HWE=572.252;LEN=1;MEANALT=1.01064;MQM=0;MQMR=14.9083;NS=95;NUMALT=1;ODDS=0;PAIRED=0;PAIREDR=0;RO=2987;RPP=943.258;RPPR=5870.62;RUN=1;SAP=943.258;SRP=6454.5;TYPE=snp;XAI=0;XAM=0.0102572;XAS=0.0102572;XRI=3.45138e-06;XRM=0.000785113;XRS=0.000781662;technology.Illumina=1;BVAR;SURRSEQ…	NON_SYNONYMOUS_CODING(MODERATE|MISSENSE|aCa/aTa|T883I|1249|Jcr4S19665.10|protein_coding|CODING|Jcr4S19665.10|1|1)	G/G	G/G	G/G	G/G	G/G	G/G	G/G	G/A	G/G	./.	G/G	G/G	G/A	G/G	G/G	G/G	G/G	./.	G/G	G/G	G/G	G/G	G/G	G/G	G/G	G/G	./.	G/G	G/G	G/G	./.	./.	G/G	G/G	G/G	G/G
Jcr4S19665	4231	Jcr4S19665_4231	GO:0015074;GO:0008270;GO:0003676	DNA integration	-	nucleic acid binding; zinc ion binding	-	-	-	A	G	AB=0.136072;ABP=3587.63;AC=85;AF=0.447368;AN=190;AO=436;CIGAR=1X;DP=3435;DPRA=0.801418;EPP=949.772;EPPR=6404.93;GTI=0;HWE=572.252;LEN=1;MEANALT=1.03191;MQM=0;MQMR=14.8735;NS=95;NUMALT=1;ODDS=0;PAIRED=0;PAIREDR=0;RO=2996;RPP=949.772;RPPR=6430.8;RUN=1;SAP=949.772;SRP=6448.08;TYPE=snp;XAI=0;XAM=0.0101399;XAS=0.0101399;XRI=8.49826e-06;XRM=0.000774405;XRS=0.000765907;technology.Illumina=1;BVAR;SURRSEQ…	SYNONYMOUS_CODING(LOW|SILENT|ctT/ctC|L879|1249|Jcr4S19665.10|protein_coding|CODING|Jcr4S19665.10|1|1)	A/A	A/A	A/A	A/A	A/A	A/A	A/A	A/G	A/A	./.	A/A	A/A	A/A	A/A	A/A	A/A	A/A	./.	A/A	A/A	A/A	A/A	A/A	A/A	A/A	A/A	./.	A/A	A/A	A/A	./.	./.	A/A	A/A	A/A	A/A
Jcr4S01712	4474	Jcr4S01712_4474	GO:0015074;GO:0008270;GO:0003676	DNA integration	-	nucleic acid binding; zinc ion binding	-	-	-	C	T	AB=0.130509;ABP=6917.57;AC=90;AF=0.473684;AN=190;AO=769;CIGAR=1X;DP=6027;DPRA=0;EPP=1672.87;EPPR=11353.4;GTI=0;HWE=791.406;LEN=1;MEANALT=1.03158;MQM=0;MQMR=10.1477;NS=95;NUMALT=1;ODDS=0;PAIRED=0;PAIREDR=0;RO=5255;RPP=1672.87;RPPR=11362;RUN=1;SAP=1672.87;SRP=11405.4;TYPE=snp;XAI=0;XAM=0.0104381;XAS=0.0104381;XRI=3.92361e-06;XRM=0.00865854;XRS=0.00865461;technology.Illumina=1;BVAR;SURRSEQ=CACATTTTT…	NON_SYNONYMOUS_CODING(MODERATE|MISSENSE|aGt/aAt|S75N|1037|Jcr4S01712.10|protein_coding|CODING|Jcr4S01712.10|2|1);UPSTREAM(MODIFIER||2763||194|Jcr4S01712.20|protein_coding|CODING|Jcr4S01712.20||1)	C/C	C/C	C/C	C/C	C/C	C/C	C/C	C/C	C/C	C/C	C/C	C/C	C/C	C/C	C/C	C/T	C/C	C/C	C/C	C/C	C/C	C/C	C/T	C/C	C/C	C/C	./.	C/C	./.	C/C	C/C	./.	C/C	C/C	C/C	C/C
Jcr4S13894	5888	Jcr4S13894_5888	-	-	-	-	-	-	-	A	T	AB=0.139833;ABP=20284.2;AC=95;AF=0.494792;AN=192;AO=2529;CIGAR=1X;DP=18218;DPRA=0;EPP=3.15541;EPPR=21.9764;GTI=0;HWE=1042.78;LEN=1;MEANALT=1.09375;MQM=17.9201;MQMR=19.2604;NS=96;NUMALT=1;ODDS=0;PAIRED=0;PAIREDR=0;RO=15674;RPP=5494.66;RPPR=4224.37;RUN=1;SAP=3.15541;SRP=10.2122;TYPE=snp;XAI=8.15285e-06;XAM=0.0103553;XAS=0.0103472;XRI=0.00146292;XRM=0.0130906;XRS=0.0116277;technology.Illumina=1;BVAR…	DOWNSTREAM(MODIFIER||1880||326|Jcr4S13894.20|protein_coding|CODING|Jcr4S13894.20||1);UPSTREAM(MODIFIER||3820||82|Jcr4S13894.10|protein_coding|CODING|Jcr4S13894.10||1)	A/A	A/T	A/A	A/A	A/A	A/A	A/A	A/A	A/A	A/T	A/A	A/A	A/A	A/A	A/A	A/T	A/A	A/A	A/A	A/A	A/A	A/A	A/A	A/A	A/A	A/A	A/A	A/A	A/A	A/A	A/A	A/A	A/A	A/A	A/A	A/A
Jcr4S27124	7738	Jcr4S27124_7738	GO:0015074;GO:0003676	DNA integration	-	nucleic acid binding	-	-	-	G	T	AB=0.134146;ABP=3530.33;AC=80;AF=0.416667;AN=192;AO=435;CIGAR=1X;DP=3618;DPRA=1.5449;EPP=947.601;EPPR=2478.77;GTI=0;HWE=401.821;LEN=1;MEANALT=1;MQM=0;MQMR=13.7597;NS=96;NUMALT=1;ODDS=0;PAIRED=0;PAIREDR=0;RO=3183;RPP=947.601;RPPR=6785.13;RUN=1;SAP=947.601;SRP=2432.2;TYPE=snp;XAI=2.39464e-05;XAM=0.0102858;XAS=0.0102618;XRI=9.78404e-06;XRM=0.00576348;XRS=0.00575369;technology.Illumina=1;BVAR;SURRSEQ…	DOWNSTREAM(MODIFIER||1495||124|Jcr4S27124.30|protein_coding|CODING|Jcr4S27124.30||1);STOP_GAINED(HIGH|NONSENSE|Gag/Tag|E1489*|1744|Jcr4S27124.20|protein_coding|CODING|Jcr4S27124.20|9|1)	G/G	G/G	G/G	G/G	G/G	G/G	G/G	G/G	G/G	./.	G/G	G/G	G/G	G/G	G/G	G/G	G/G	G/G	G/G	G/G	G/G	G/G	G/G	G/G	G/G	G/G	./.	G/G	./.	G/G	G/G	G/G	G/G	G/G	G/G	G/G
Jcr4S04520	8691	Jcr4S04520_8691	GO:0015074;GO:0008270;GO:0003676	DNA integration	-	nucleic acid binding; zinc ion binding	-	-	-	C	T	AB=0.130836;ABP=10525.2;AC=94;AF=0.489583;AN=192;AO=1169;CIGAR=1X;DP=8986;DPRA=31.5193;EPP=804.819;EPPR=16687.6;GTI=0;HWE=972.993;LEN=1;MEANALT=1.02105;MQM=0.155689;MQMR=22.9711;NS=96;NUMALT=1;ODDS=0;PAIRED=0;PAIREDR=0;RO=7815;RPP=795.085;RPPR=16739.4;RUN=1;SAP=2506.84;SRP=16921;TYPE=snp;XAI=0.000114921;XAM=0.00892691;XAS=0.00881199;XRI=4.2282e-05;XRM=0.000663241;XRS=0.000620959;technology.Illumi…	DOWNSTREAM(MODIFIER||4058||113|Jcr4S04520.20|protein_coding|CODING|Jcr4S04520.20||1);SYNONYMOUS_CODING(LOW|SILENT|cgC/cgT|R13|1726|Jcr4S04520.40|protein_coding|CODING|Jcr4S04520.40|1|1);UPSTREAM(MODIFIER||1738||151|Jcr4S04520.30|protein_coding|CODING|Jcr4S04520.30||1)	C/C	C/C	C/C	C/C	C/C	C/C	C/C	C/C	C/C	C/T	C/C	C/C	C/C	C/C	C/T	C/C	C/C	C/C	C/T	C/C	C/C	C/C	C/C	C/T	C/C	C/C	C/C	C/C	C/C	C/C	C/C	C/C	C/C	C/C	C/C	C/C
Jcr4S00841	63078	Jcr4S00841_63078	-	-	-	-	-	-	-	A	G	AB=0.137138;ABP=5173.51;AC=89;AF=0.463542;AN=192;AO=630;CIGAR=1X;DP=4760;DPRA=7.76923;EPP=1371.04;EPPR=8888.85;GTI=0;HWE=707.426;LEN=1;MEANALT=1.02128;MQM=0;MQMR=0;NS=96;NUMALT=1;ODDS=0;PAIRED=0;PAIREDR=0;RO=4128;RPP=1362.37;RPPR=8966.85;RUN=1;SAP=1362.37;SRP=8888.85;TYPE=snp;XAI=3.20667e-05;XAM=0.000577756;XAS=0.000545689;XRI=1.96006e-05;XRM=0.000735031;XRS=0.000715431;technology.Illumina=1;BVAR…	NON_SYNONYMOUS_CODING(MODERATE|MISSENSE|tTt/tCt|F395S|486|Jcr4S00841.120|protein_coding|CODING|Jcr4S00841.120|1|1);UPSTREAM(MODIFIER||1368||345|Jcr4S00841.110|protein_coding|CODING|Jcr4S00841.110||1);UPSTREAM(MODIFIER||2965||417|Jcr4S00841.100|protein_coding|CODING|Jcr4S00841.100||1)	A/A	A/A	A/A	A/G	A/A	A/A	A/A	A/G	A/A	./.	A/A	A/A	A/A	A/A	A/A	A/A	A/A	A/A	./.	A/A	A/A	A/A	A/A	A/A	A/A	A/A	A/A	A/A	./.	A/A	A/A	A/A	A/G	A/A	A/A	A/A
Jcr4S11024	3616	Jcr4S11024_3616	-	-	-	-	-	-	-	G	A	AB=0.137884;ABP=3373.19;AC=82;AF=0.427083;AN=192;AO=424;CIGAR=1X;DP=3360;DPRA=3.38298;EPP=923.715;EPPR=6367.6;GTI=0;HWE=439.45;LEN=1;MEANALT=1.05319;MQM=0;MQMR=14.8526;NS=96;NUMALT=1;ODDS=0;PAIRED=0;PAIREDR=0;RO=2931;RPP=923.715;RPPR=6367.6;RUN=1;SAP=923.715;SRP=6367.6;TYPE=snp;XAI=2.43143e-05;XAM=0.000505639;XAS=0.000481325;XRI=1.75888e-05;XRM=0.000693781;XRS=0.000676192;technology.Illumina=1;BV…	INTERGENIC(MODIFIER||||||||||1)	G/G	G/G	G/G	G/G	G/G	G/G	G/G	G/G	./.	G/G	G/A	G/G	G/G	G/G	G/G	G/G	G/G	./.	G/G	G/G	G/G	G/G	./.	G/G	G/G	G/G	G/G	G/G	./.	G/G	G/G	./.	G/G	G/G	G/G	G/A
Jcr4S00120	5323	Jcr4S00120_5323	GO:0015074;GO:0003676	DNA integration	-	nucleic acid binding	-	-	-	G	A	AB=0.853503;ABP=5285.79;AC=101;AF=0.526042;AN=192;AO=4415;CIGAR=1X;DP=5144;DPRA=0;EPP=9590.06;EPPR=4.87199;GTI=0;HWE=802.493;LEN=1;MEANALT=1;MQM=37;MQMR=37;NS=96;NUMALT=1;ODDS=0;PAIRED=0;PAIREDR=0;RO=729;RPP=9572.7;RPPR=4.87199;RUN=1;SAP=9572.7;SRP=1586.01;TYPE=snp;XAI=2.33506e-06;XAM=0.0104476;XAS=0.0104453;XRI=0;XRM=0.0157246;XRS=0.0157246;technology.Illumina=1;BVAR;SURRSEQ=ATCGGTTTCCATATTAGGAG…	NON_SYNONYMOUS_CODING(MODERATE|MISSENSE|aCg/aTg|T359M|1550|Jcr4S00120.20|protein_coding|CODING|Jcr4S00120.20|1|1);UPSTREAM(MODIFIER||2648||63|Jcr4S00120.30|protein_coding|CODING|Jcr4S00120.30||1)	A/A	G/A	A/A	A/A	A/A	G/A	A/A	A/A	A/A	A/A	A/A	A/A	A/A	A/A	A/A	A/A	A/A	A/A	A/A	A/A	A/A	./.	A/A	A/A	A/A	A/A	A/A	A/A	./.	A/A	G/A	A/A	A/A	A/A	A/A	A/A
Jcr4S04620	5966	Jcr4S04620_5966	GO:0015074;GO:0003676	DNA integration	-	nucleic acid binding	-	-	-	G	A	AB=0.160355;ABP=12437.8;AC=95;AF=0.494792;AN=192;AO=1990;CIGAR=1X;DP=12413;DPRA=43.5439;EPP=4315.56;EPPR=1180.13;GTI=0;HWE=1042.78;LEN=1;MEANALT=1;MQM=0.0417085;MQMR=23.2783;NS=96;NUMALT=1;ODDS=0;PAIRED=0;PAIREDR=0;RO=10423;RPP=3802.49;RPPR=8206.32;RUN=1;SAP=3794.35;SRP=656.44;TYPE=snp;XAI=1.03611e-05;XAM=0.0104509;XAS=0.0104406;XRI=1.088e-05;XRM=0.00480203;XRS=0.00479115;technology.Illumina=1;BV…	NON_SYNONYMOUS_CODING(MODERATE|MISSENSE|Gtc/Atc|V402I|956|Jcr4S04620.10|protein_coding|CODING|Jcr4S04620.10|6|1|WARNING_TRANSCRIPT_MULTIPLE_STOP_CODONS);UPSTREAM(MODIFIER||4714||98|Jcr4S04620.20|protein_coding|CODING|Jcr4S04620.20||1)	G/G	G/G	G/G	G/G	G/G	G/G	G/G	G/G	G/G	G/G	G/G	G/G	G/G	G/G	G/G	G/G	G/G	G/A	G/G	G/A	G/G	G/G	G/G	G/G	G/G	G/G	G/G	G/A	G/A	G/G	G/G	G/G	G/G	G/G	G/G	G/G
Jcr4S08588	6705	Jcr4S08588_6705	-	-	-	-	-	-	-	A	T	AB=0.124567;ABP=5654.27;AC=74;AF=0.389474;AN=190;AO=653;CIGAR=1X;DP=6012;DPRA=0;EPP=1386.45;EPPR=233.417;GTI=0;HWE=227.093;LEN=1;MEANALT=1.01053;MQM=0;MQMR=0;NS=95;NUMALT=1;ODDS=0;PAIRED=0;PAIREDR=0;RO=5358;RPP=1420.98;RPPR=11637.8;RUN=1;SAP=1386.45;SRP=233.417;TYPE=snp;XAI=0;XAM=0.0103447;XAS=0.0103447;XRI=2.96249e-06;XRM=0.000788229;XRS=0.000785267;technology.Illumina=1;BVAR;SURRSEQ=ACGTGGAAATT…	DOWNSTREAM(MODIFIER||3100||107|Jcr4S08588.10|protein_coding|CODING|Jcr4S08588.10||1);INTERGENIC(MODIFIER||||||||||1);UPSTREAM(MODIFIER||3369||214|Jcr4S08588.20|protein_coding|CODING|Jcr4S08588.20||1)	A/A	A/A	A/A	A/A	A/A	A/A	A/A	A/T	A/A	A/A	A/T	A/A	A/A	A/A	A/A	A/A	A/A	A/A	A/A	A/A	A/A	A/A	A/A	./.	A/A	A/A	./.	A/A	./.	A/A	A/A	./.	A/A	A/A	A/A	A/A
Jcr4S01211	25243	Jcr4S01211_25243	-	-	-	-	-	-	-	C	T	AB=0.138702;ABP=4057.55;AC=87;AF=0.457895;AN=190;AO=509;CIGAR=1X;DP=3918;DPRA=0;EPP=1108.29;EPPR=7336.24;GTI=0;HWE=653.168;LEN=1;MEANALT=1;MQM=0;MQMR=0.0797888;NS=95;NUMALT=1;ODDS=0;PAIRED=0;PAIREDR=0;RO=3409;RPP=1108.29;RPPR=7405.56;RUN=1;SAP=1108.29;SRP=7336.24;TYPE=snp;XAI=0;XAM=0.0102668;XAS=0.0102668;XRI=0;XRM=0.00998562;XRS=0.00998562;technology.Illumina=1;BVAR;SURRSEQ=TGGTGCAACTGATCATATGAC…	DOWNSTREAM(MODIFIER||1908||215|Jcr4S01211.40|protein_coding|CODING|Jcr4S01211.40||1);INTRON(MODIFIER||||968|Jcr4S01211.50|protein_coding|CODING|Jcr4S01211.50|1|1)	C/C	C/C	C/C	C/C	C/C	C/C	C/C	C/C	C/C	C/C	C/C	C/C	C/T	C/C	C/C	C/C	C/C	C/C	C/C	C/C	C/C	C/C	C/C	./.	C/C	C/C	C/C	C/C	C/C	C/C	C/T	./.	C/C	C/C	C/T	C/C
Jcr4S00101	2129	Jcr4S00101_2129	-	-	-	-	-	-	-	G	A	AB=0.133461;ABP=4278.75;AC=83;AF=0.436842;AN=190;AO=507;CIGAR=1X;DP=4140;DPRA=1.11993;EPP=1103.95;EPPR=1487.99;GTI=0;HWE=498.237;LEN=1;MEANALT=1.01075;MQM=0;MQMR=0;NS=95;NUMALT=1;ODDS=0;PAIRED=0;PAIREDR=0;RO=3632;RPP=1103.95;RPPR=7657.02;RUN=1;SAP=1103.95;SRP=1387.97;TYPE=snp;XAI=4.06678e-05;XAM=0.000807844;XAS=0.000767176;XRI=1.96682e-05;XRM=0.00702021;XRS=0.00700054;technology.Illumina=1;BVAR;S…	INTERGENIC(MODIFIER||||||||||1);UPSTREAM(MODIFIER||452||1669|Jcr4S00101.10|protein_coding|CODING|Jcr4S00101.10||1)	G/G	G/G	./.	G/G	./.	G/G	G/G	G/G	G/G	G/G	G/G	G/G	G/G	G/G	G/G	G/G	G/G	G/G	./.	G/G	G/G	G/G	G/G	G/G	G/G	G/G	G/G	G/G	G/G	G/G	G/G	G/G	G/G	G/G	G/A	G/G
Jcr4S12675	3260	Jcr4S12675_3260	-	-	-	-	-	-	-	T	G	AB=0.139754;ABP=2753.45;AC=83;AF=0.436842;AN=190;AO=350;CIGAR=1X;DP=2726;DPRA=1.53268;EPP=720.217;EPPR=5145.07;GTI=0;HWE=498.237;LEN=1;MEANALT=1;MQM=12.58;MQMR=9.12205;NS=95;NUMALT=1;ODDS=0;PAIRED=0;PAIREDR=0;RO=2376;RPP=720.217;RPPR=5162.43;RUN=1;SAP=763.026;SRP=5145.07;TYPE=snp;XAI=0;XAM=0.000612245;XAS=0.000612245;XRI=0.00197314;XRM=0.00910159;XRS=0.00712845;technology.Illumina=1;BVAR;SURRSEQ=…	INTERGENIC(MODIFIER||||||||||1)	T/T	T/T	T/T	T/T	T/T	T/T	./.	T/T	T/T	./.	T/T	T/T	T/T	./.	T/T	T/T	T/T	./.	T/T	T/T	./.	T/T	T/T	T/T	T/T	T/T	./.	T/T	./.	T/T	T/T	T/T	T/T	T/T	T/T	T/T
Jcr4S09334	5817	Jcr4S09334_5817	-	-	-	-	-	-	-	C	T	AB=0.14206;ABP=3990.34;AC=86;AF=0.447917;AN=192;AO=521;CIGAR=1X;DP=3904;DPRA=5.91185;EPP=1134.35;EPPR=7349.1;GTI=0;HWE=582.426;LEN=1;MEANALT=1;MQM=0;MQMR=0;NS=96;NUMALT=1;ODDS=0;PAIRED=0;PAIREDR=0;RO=3383;RPP=1134.35;RPPR=7349.1;RUN=1;SAP=1134.35;SRP=7349.1;TYPE=snp;XAI=0;XAM=0.000684211;XAS=0.000684211;XRI=0.000457301;XRM=0.00366415;XRS=0.00320685;technology.Illumina=1;BVAR;SURRSEQ=TTCACTTTCCCAT…	INTRON(MODIFIER||||1134|Jcr4S09334.10|protein_coding|CODING|Jcr4S09334.10|7|1)	C/C	C/C	C/C	C/C	C/C	./.	C/C	C/C	C/C	C/C	C/C	C/C	C/C	C/C	C/C	C/C	C/C	./.	C/C	C/C	C/C	./.	C/T	C/C	C/C	C/C	C/C	C/C	./.	C/C	C/C	C/C	C/C	C/T	C/C	C/C
Jcr4S06078	6626	Jcr4S06078_6626	-	-	-	-	-	-	-	A	G	AB=0.840224;ABP=10046.1;AC=98;AF=0.510417;AN=192;AO=8463;CIGAR=1X;DP=10062;DPRA=0;EPP=18380.2;EPPR=3462.17;GTI=0;HWE=972.993;LEN=1;MEANALT=1.0625;MQM=0;MQMR=36.5016;NS=96;NUMALT=1;ODDS=0;PAIRED=0;PAIREDR=0;RO=1593;RPP=18380.2;RPPR=3462.17;RUN=1;SAP=18380.2;SRP=3462.17;TYPE=snp;XAI=6.14155e-06;XAM=0.00442798;XAS=0.00442184;XRI=1.33699e-05;XRM=0.000775418;XRS=0.000762049;technology.Illumina=1;BVAR;…	INTERGENIC(MODIFIER||||||||||1);UPSTREAM(MODIFIER||3083||199|Jcr4S06078.10|protein_coding|CODING|Jcr4S06078.10||1);UPSTREAM(MODIFIER||486||278|Jcr4S06078.20|protein_coding|CODING|Jcr4S06078.20||1)	G/G	G/G	G/G	G/G	A/G	G/G	G/G	A/G	G/G	G/G	G/G	G/G	G/G	G/G	A/G	G/G	G/G	G/G	G/G	G/G	G/G	G/G	G/G	G/G	G/G	G/G	A/G	G/G	A/G	G/G	G/G	G/G	G/G	G/G	G/G	G/G
Jcr4S20639	1525	Jcr4S20639_1525	-	-	-	-	-	-	-	C	T	AB=0.156341;ABP=10534;AC=95;AF=0.494792;AN=192;AO=1605;CIGAR=1X;DP=10267;DPRA=108.063;EPP=3488.22;EPPR=8180.32;GTI=0;HWE=1042.78;LEN=1;MEANALT=1.01053;MQM=0;MQMR=0.149636;NS=96;NUMALT=1;ODDS=0;PAIRED=0;PAIREDR=0;RO=8661;RPP=3488.22;RPPR=8180.32;RUN=1;SAP=3488.22;SRP=18810.1;TYPE=snp;XAI=0;XAM=0.0043264;XAS=0.0043264;XRI=2.34443e-06;XRM=0.00701918;XRS=0.00701683;technology.Illumina=1;BVAR;SURRSEQ=…	SYNONYMOUS_CODING(LOW|SILENT|Ctg/Ttg|L213|612|Jcr4S20639.10|protein_coding|CODING|Jcr4S20639.10|2|1)	C/C	C/C	C/T	C/C	C/C	C/C	C/C	C/C	C/C	C/C	C/C	C/T	C/C	C/C	C/C	C/C	C/C	C/C	C/T	C/C	C/C	C/C	C/C	C/C	C/C	C/C	C/C	C/C	C/C	C/C	C/C	C/C	C/C	C/C	C/C	C/C
Jcr4S05628	1893	Jcr4S05628_1893	-	-	-	-	-	-	-	A	G	AB=0.143708;ABP=5373.89;AC=90;AF=0.46875;AN=192;AO=707;CIGAR=1X;DP=5080;DPRA=2.18454;EPP=1529.57;EPPR=9451.14;GTI=0;HWE=753.559;LEN=1;MEANALT=1.02128;MQM=0;MQMR=0;NS=96;NUMALT=1;ODDS=0;PAIRED=0;PAIREDR=0;RO=4371;RPP=1529.57;RPPR=9494.52;RUN=1;SAP=1538.24;SRP=9451.14;TYPE=snp;XAI=1.45817e-05;XAM=0.0103015;XAS=0.010287;XRI=4.74169e-06;XRM=0.00485817;XRS=0.00485342;technology.Illumina=1;BVAR;SURRSEQ…	DOWNSTREAM(MODIFIER||1082||79|Jcr4S05628.10|protein_coding|CODING|Jcr4S05628.10||1);INTERGENIC(MODIFIER||||||||||1);UPSTREAM(MODIFIER||2431||2157|Jcr4S05628.20|protein_coding|CODING|Jcr4S05628.20||1)	A/A	A/A	A/A	A/A	A/A	./.	A/A	A/G	./.	A/A	A/G	A/A	A/A	A/A	A/A	A/G	A/A	A/A	A/A	A/A	A/A	A/A	A/G	A/A	A/A	A/A	./.	A/A	A/A	A/A	A/A	A/A	A/A	A/A	A/A	A/A
Jcr4S26388	3426	Jcr4S26388_3426	-	-	-	-	-	-	-	T	C	AB=0.151075;ABP=3936.89;AC=88;AF=0.458333;AN=192;AO=571;CIGAR=1X;DP=3968;DPRA=1.72982;EPP=1242.92;EPPR=7163.95;GTI=0;HWE=663.709;LEN=1;MEANALT=1;MQM=0;MQMR=0;NS=96;NUMALT=1;ODDS=0;PAIRED=0;PAIREDR=0;RO=3397;RPP=1242.92;RPPR=7206.81;RUN=1;SAP=1242.92;SRP=7336.14;TYPE=snp;XAI=0;XAM=0.000768433;XAS=0.000768433;XRI=4.25191e-05;XRM=0.0121245;XRS=0.012082;technology.Illumina=1;BVAR;SURRSEQ=CTGGCAAACTTT…	DOWNSTREAM(MODIFIER||537||163|Jcr4S26388.20|protein_coding|CODING|Jcr4S26388.20||1);INTERGENIC(MODIFIER||||||||||1);UPSTREAM(MODIFIER||458||273|Jcr4S26388.10|protein_coding|CODING|Jcr4S26388.10||1)	T/T	T/C	T/T	T/T	T/T	T/T	T/T	T/T	T/C	T/T	T/C	T/T	T/T	T/T	./.	T/T	T/T	T/T	T/T	T/T	T/T	T/T	T/T	T/T	T/T	T/T	T/T	T/T	T/T	T/C	T/T	T/T	T/T	T/T	T/T	T/T
Jcr4S04965	6215	Jcr4S04965_6215	-	-	-	-	-	-	-	G	A	AB=0.141694;ABP=3426.44;AC=83;AF=0.436842;AN=190;AO=452;CIGAR=1X;DP=3519;DPRA=1.0914;EPP=984.516;EPPR=6662.92;GTI=0;HWE=498.237;LEN=1;MEANALT=1;MQM=0;MQMR=0;NS=95;NUMALT=1;ODDS=0;PAIRED=0;PAIREDR=0;RO=3067;RPP=984.516;RPPR=6662.92;RUN=1;SAP=984.516;SRP=6662.92;TYPE=snp;XAI=0;XAM=0.00108857;XAS=0.00108857;XRI=1.34804e-05;XRM=0.00956802;XRS=0.00955454;technology.Illumina=1;BVAR;SURRSEQ=CCCCACTTGAGC…	DOWNSTREAM(MODIFIER||22||1048|Jcr4S04965.20|protein_coding|CODING|Jcr4S04965.20||1);UPSTREAM(MODIFIER||4683||252|Jcr4S04965.10|protein_coding|CODING|Jcr4S04965.10||1)	G/G	G/G	G/G	G/G	G/G	G/G	G/G	G/G	G/G	./.	G/G	./.	G/G	G/G	G/A	G/G	G/G	G/G	G/G	G/G	G/G	G/G	G/G	G/G	G/G	G/G	G/G	G/G	G/G	G/G	G/G	G/G	G/G	./.	G/G	G/G
Jcr4S04993	6327	Jcr4S04993_6327	-	-	-	-	-	-	-	G	A	AB=0.150154;ABP=3458.04;AC=88;AF=0.458333;AN=192;AO=498;CIGAR=1X;DP=3493;DPRA=1.98735;EPP=1084.4;EPPR=6504.4;GTI=0;HWE=663.709;LEN=1;MEANALT=1.01064;MQM=0;MQMR=0;NS=96;NUMALT=1;ODDS=0;PAIRED=0;PAIREDR=0;RO=2994;RPP=1084.4;RPPR=6504.4;RUN=1;SAP=1084.4;SRP=6504.4;TYPE=snp;XAI=0;XAM=0.000601044;XAS=0.000601044;XRI=3.44331e-06;XRM=0.00546037;XRS=0.00545692;technology.Illumina=1;BVAR;SURRSEQ=GTGAAACAA…	DOWNSTREAM(MODIFIER||3185||79|Jcr4S04993.10|protein_coding|CODING|Jcr4S04993.10||1);INTERGENIC(MODIFIER||||||||||1);UPSTREAM(MODIFIER||2512||331|Jcr4S04993.30|protein_coding|CODING|Jcr4S04993.30||1);UPSTREAM(MODIFIER||619||300|Jcr4S04993.20|protein_coding|CODING|Jcr4S04993.20||1)	G/G	G/G	./.	./.	G/G	G/G	G/G	G/G	G/G	G/G	G/G	G/G	G/G	G/G	G/G	G/G	G/G	G/G	G/G	G/G	G/G	G/G	G/G	./.	G/G	G/G	G/G	G/G	./.	G/G	G/G	G/G	G/G	G/G	G/G	G/G
Jcr4S19681	10116	Jcr4S19681_10116	-	-	-	-	-	-	-	C	T	AB=0.154624;ABP=13625.5;AC=95;AF=0.494792;AN=192;AO=2038;CIGAR=1X;DP=13252;DPRA=0;EPP=4411.12;EPPR=717.905;GTI=0;HWE=1042.78;LEN=1;MEANALT=1.03125;MQM=27.7282;MQMR=29.0506;NS=96;NUMALT=1;ODDS=0;PAIRED=0;PAIREDR=0;RO=11209;RPP=1111.55;RPPR=11623.7;RUN=1;SAP=1102.87;SRP=464.242;TYPE=snp;XAI=5.05853e-06;XAM=0.00329228;XAS=0.00328722;XRI=4.72851e-06;XRM=0.0101514;XRS=0.0101467;technology.Illumina=1;B…	INTRON(MODIFIER||||1484|Jcr4S19681.40|protein_coding|CODING|Jcr4S19681.40|2|1);UPSTREAM(MODIFIER||2765||47|Jcr4S19681.30|protein_coding|CODING|Jcr4S19681.30||1)	C/C	C/C	C/C	C/C	C/C	C/C	C/C	C/C	C/C	C/C	C/C	C/C	C/C	C/C	C/T	C/C	C/C	C/T	C/C	C/C	C/C	C/C	C/C	C/C	C/T	C/C	C/C	C/C	C/C	C/C	C/C	C/C	C/C	C/C	C/C	C/C
Jcr4S06333	10748	Jcr4S06333_10748	-	-	-	-	-	-	-	C	T	AB=0.144992;ABP=3445.8;AC=88;AF=0.463158;AN=190;AO=463;CIGAR=1X;DP=3384;DPRA=1.30166;EPP=991.105;EPPR=1908.49;GTI=0;HWE=696.702;LEN=1;MEANALT=1;MQM=0.0388769;MQMR=13.7189;NS=95;NUMALT=1;ODDS=0;PAIRED=0;PAIREDR=0;RO=2921;RPP=1008.4;RPPR=6250.7;RUN=1;SAP=991.105;SRP=1856.49;TYPE=snp;XAI=0;XAM=0.0102363;XAS=0.0102363;XRI=7.05873e-06;XRM=0.0107701;XRS=0.0107631;technology.Illumina=1;BVAR;SURRSEQ=GAGG…	DOWNSTREAM(MODIFIER||4548||1357|Jcr4S06333.40|protein_coding|CODING|Jcr4S06333.40||1);INTERGENIC(MODIFIER||||||||||1);UPSTREAM(MODIFIER||36||744|Jcr4S06333.30|protein_coding|CODING|Jcr4S06333.30||1)	C/C	./.	C/C	C/C	./.	C/C	C/C	C/C	C/C	C/C	C/C	C/C	C/C	C/C	./.	C/C	./.	C/C	C/C	C/C	C/C	./.	C/C	C/C	C/C	C/C	C/C	C/C	./.	C/C	./.	C/C	C/C	C/C	C/C	C/C
Jcr4S01712	4468	Jcr4S01712_4468	GO:0015074;GO:0008270;GO:0003676	DNA integration	-	nucleic acid binding; zinc ion binding	-	-	-	C	T	AB=0.153036;ABP=8543.8;AC=93;AF=0.489474;AN=190;AO=1260;CIGAR=1X;DP=8352;DPRA=0;EPP=2739.07;EPPR=1713.41;GTI=0;HWE=961.36;LEN=1;MEANALT=1.03158;MQM=0;MQMR=7.51897;NS=95;NUMALT=1;ODDS=0;PAIRED=0;PAIREDR=0;RO=7089;RPP=2739.07;RPPR=15344.5;RUN=1;SAP=2739.07;SRP=1730.82;TYPE=snp;XAI=8.18197e-06;XAM=0.0103623;XAS=0.0103541;XRI=2.90853e-06;XRM=0.00853419;XRS=0.00853128;technology.Illumina=1;BVAR;SURRSE…	NON_SYNONYMOUS_CODING(MODERATE|MISSENSE|gGg/gAg|G77E|1037|Jcr4S01712.10|protein_coding|CODING|Jcr4S01712.10|2|1);UPSTREAM(MODIFIER||2769||194|Jcr4S01712.20|protein_coding|CODING|Jcr4S01712.20||1)	C/C	C/C	C/C	C/C	C/C	C/C	C/C	C/C	C/C	C/T	C/C	C/C	C/C	C/C	C/C	C/C	C/C	C/C	C/C	C/C	C/C	C/C	C/T	C/C	C/C	C/C	C/T	C/C	C/T	C/C	C/C	C/T	C/C	C/C	C/T	C/C
Jcr4S03870	2860	Jcr4S03870_2860	-	-	-	-	-	-	-	G	A	AB=0.164186;ABP=8426.85;AC=95;AF=0.494792;AN=192;AO=1412;CIGAR=1X;DP=8603;DPRA=30.1754;EPP=3051.78;EPPR=15477.2;GTI=0;HWE=1042.78;LEN=1;MEANALT=1.01053;MQM=0;MQMR=0;NS=96;NUMALT=1;ODDS=0;PAIRED=0;PAIREDR=0;RO=7190;RPP=3060.45;RPPR=15537.8;RUN=1;SAP=3060.45;SRP=15555.2;TYPE=snp;XAI=7.30119e-06;XAM=0.00257896;XAS=0.00257166;XRI=3.31332e-06;XRM=0.00114281;XRS=0.0011395;technology.Illumina=1;BVAR;SUR…	DOWNSTREAM(MODIFIER||4227||1364|Jcr4S03870.40|protein_coding|CODING|Jcr4S03870.40||1);DOWNSTREAM(MODIFIER||844||228|Jcr4S03870.10|protein_coding|CODING|Jcr4S03870.10||1);SYNONYMOUS_CODING(LOW|SILENT|ttG/ttA|L61|551|Jcr4S03870.20|protein_coding|CODING|Jcr4S03870.20|2|1);UPSTREAM(MODIFIER||2334||396|Jcr4S03870.30|protein_coding|CODING|Jcr4S03870.30||1)	G/G	G/G	G/G	G/G	G/A	G/G	G/G	G/G	G/A	G/G	G/G	G/G	G/G	G/G	G/G	G/G	G/G	G/G	G/G	G/G	G/G	G/G	G/A	G/G	G/G	G/G	G/G	G/G	G/A	G/G	G/G	G/G	G/A	G/G	G/G	G/G
Jcr4S09770	4542	Jcr4S09770_4542	-	-	-	-	-	-	-	C	T	AB=0.148011;ABP=7848.14;AC=91;AF=0.473958;AN=192;AO=1095;CIGAR=1X;DP=7591;DPRA=79.8947;EPP=7.39092;EPPR=5.15166;GTI=0;HWE=802.493;LEN=1;MEANALT=1.04211;MQM=0;MQMR=0;NS=96;NUMALT=1;ODDS=0;PAIRED=0;PAIREDR=0;RO=6490;RPP=2380.77;RPPR=14095.9;RUN=1;SAP=7.39092;SRP=5.15166;TYPE=snp;XAI=0;XAM=0.00104084;XAS=0.00104084;XRI=2.24079e-05;XRM=0.00399063;XRS=0.00396822;technology.Illumina=1;BVAR;SURRSEQ=CCCG…	DOWNSTREAM(MODIFIER||2087||418|Jcr4S09770.10|protein_coding|CODING|Jcr4S09770.10||1);INTERGENIC(MODIFIER||||||||||1);UPSTREAM(MODIFIER||1338||1639|Jcr4S09770.20|protein_coding|CODING|Jcr4S09770.20||1)	C/C	C/C	C/C	C/C	C/T	C/C	C/C	C/C	C/C	C/C	C/C	C/T	C/T	C/C	C/C	C/C	C/T	C/T	C/C	C/C	C/C	C/C	C/C	C/C	C/C	C/C	C/C	C/C	C/C	C/C	C/C	C/C	C/C	C/C	C/C	C/C
Jcr4S08348	4547	Jcr4S08348_4547	-	-	-	-	-	-	-	G	A	AB=0.152293;ABP=4423;AC=89;AF=0.463542;AN=192;AO=653;CIGAR=1X;DP=4478;DPRA=3.38146;EPP=1420.98;EPPR=8265.52;GTI=0;HWE=707.426;LEN=1;MEANALT=1;MQM=0;MQMR=0.0433987;NS=96;NUMALT=1;ODDS=0;PAIRED=0;PAIREDR=0;RO=3825;RPP=1420.98;RPPR=8308.89;RUN=1;SAP=1420.98;SRP=8265.52;TYPE=snp;XAI=0;XAM=0.0104111;XAS=0.0104111;XRI=2.69524e-06;XRM=0.0039818;XRS=0.00397911;technology.Illumina=1;BVAR;SURRSEQ=TAATCAATA…	DOWNSTREAM(MODIFIER||1105||188|Jcr4S08348.20|protein_coding|CODING|Jcr4S08348.20||1);INTERGENIC(MODIFIER||||||||||1);UPSTREAM(MODIFIER||1578||1203|Jcr4S08348.30|protein_coding|CODING|Jcr4S08348.30||1);UPSTREAM(MODIFIER||2362||453|Jcr4S08348.10|protein_coding|CODING|Jcr4S08348.10||1)	G/G	G/G	G/G	G/G	G/G	G/G	G/G	G/G	G/A	G/G	G/G	G/G	G/A	G/G	G/G	G/A	./.	./.	G/G	G/G	G/G	G/G	G/G	G/G	G/G	G/G	G/G	G/G	G/G	G/G	G/G	G/G	G/G	G/G	G/G	G/A
Jcr4S15989	4689	Jcr4S15989_4689	GO:0015074;GO:0008270;GO:0003676	DNA integration	-	nucleic acid binding; zinc ion binding	-	-	-	C	T	AB=0.13748;ABP=3490.32;AC=86;AF=0.452632;AN=190;AO=432;CIGAR=1X;DP=3321;DPRA=0;EPP=941.086;EPPR=6274.22;GTI=0;HWE=611.761;LEN=1;MEANALT=1.01053;MQM=0;MQMR=0;NS=95;NUMALT=1;ODDS=0;PAIRED=0;PAIREDR=0;RO=2888;RPP=941.086;RPPR=6274.22;RUN=1;SAP=941.086;SRP=6274.22;TYPE=snp;XAI=2.38641e-05;XAM=0.000586237;XAS=0.000562373;XRI=3.56969e-06;XRM=0.00463664;XRS=0.00463307;technology.Illumina=1;BVAR;SURRSEQ=…	NON_SYNONYMOUS_CODING(MODERATE|MISSENSE|Ggt/Agt|G293S|1348|Jcr4S15989.10|protein_coding|CODING|Jcr4S15989.10|1|1)	C/C	C/C	C/C	C/C	C/C	C/C	C/C	C/C	C/C	C/C	C/C	C/C	C/C	C/C	./.	C/C	C/C	C/C	C/C	C/C	C/T	C/C	C/C	C/C	C/C	./.	C/C	C/C	C/C	./.	C/C	C/C	./.	C/C	C/C	C/C
Jcr4S10712	4804	Jcr4S10712_4804	-	-	-	-	-	-	-	T	A	AB=0.83828;ABP=1945.2;AC=136;AF=0.715789;AN=190;AO=3266;CIGAR=1X;DP=3620;DPRA=0;EPP=7095.04;EPPR=3.40965;GTI=0;HWE=-145.562;LEN=1;MEANALT=1.06316;MQM=37;MQMR=37;NS=95;NUMALT=1;ODDS=0;PAIRED=0;PAIREDR=0;RO=348;RPP=7095.04;RPPR=758.683;RUN=1;SAP=7095.04;SRP=3.40965;TYPE=snp;XAI=6.31309e-06;XAM=0.0006937;XAS=0.000687387;XRI=2.9933e-05;XRM=0.000606336;XRS=0.000576403;technology.Illumina=1;BVAR;SURRSE…	INTERGENIC(MODIFIER||||||||||1)	A/A	A/A	A/A	A/A	A/A	A/A	./.	A/A	A/A	./.	T/A	A/A	A/A	A/A	A/A	A/A	A/A	./.	T/A	T/A	A/A	A/A	A/A	A/A	A/A	A/A	A/A	A/A	T/A	A/A	./.	./.	A/A	A/A	A/A	A/A
Jcr4S20241	1820	Jcr4S20241_1820	-	-	-	-	-	-	-	T	C	AB=0.170742;ABP=18605.2;AC=95;AF=0.494792;AN=192;AO=3373;CIGAR=1X;DP=19756;DPRA=207.947;EPP=8.82042;EPPR=3.01083;GTI=0;HWE=1042.78;LEN=1;MEANALT=1.03158;MQM=0;MQMR=0;NS=96;NUMALT=1;ODDS=0;PAIRED=0;PAIREDR=0;RO=16380;RPP=6715.35;RPPR=35571.7;RUN=1;SAP=4.55602;SRP=3.01083;TYPE=snp;XAI=6.05108e-06;XAM=0.00543763;XAS=0.00543158;XRI=0.00190273;XRM=0.00679288;XRS=0.00489015;technology.Illumina=1;BVAR;S…	UPSTREAM(MODIFIER||100||238|Jcr4S20241.10|protein_coding|CODING|Jcr4S20241.10||1)	T/T	T/T	T/C	T/T	T/T	T/C	T/T	T/C	T/T	T/T	T/T	T/T	T/C	T/T	T/T	T/C	T/C	T/T	T/T	T/T	T/T	T/T	T/C	T/T	T/T	T/T	T/T	T/T	T/T	T/T	T/C	T/T	T/T	T/T	T/T	T/T
Jcr4S16852	7697	Jcr4S16852_7697	-	-	-	-	-	-	-	T	C	AB=0.163614;ABP=8695.41;AC=93;AF=0.484375;AN=192;AO=1449;CIGAR=1X;DP=9015;DPRA=94.8842;EPP=3149.47;EPPR=420.439;GTI=0;HWE=911.165;LEN=1;MEANALT=1;MQM=0;MQMR=15.5414;NS=96;NUMALT=1;ODDS=0;PAIRED=0;PAIREDR=0;RO=7566;RPP=3149.47;RPPR=16423.7;RUN=1;SAP=3149.47;SRP=421.825;TYPE=snp;XAI=1.42295e-05;XAM=0.000612499;XAS=0.000598269;XRI=5.79164e-05;XRM=0.00248611;XRS=0.00242819;technology.Illumina=1;BVAR;…	DOWNSTREAM(MODIFIER||4181||108|Jcr4S16852.20|protein_coding|CODING|Jcr4S16852.20||1);DOWNSTREAM(MODIFIER||889||122|Jcr4S16852.40|protein_coding|CODING|Jcr4S16852.40||1);INTERGENIC(MODIFIER||||||||||1);UPSTREAM(MODIFIER||1145||381|Jcr4S16852.30|protein_coding|CODING|Jcr4S16852.30||1);UPSTREAM(MODIFIER||1571||448|Jcr4S16852.50|protein_coding|CODING|Jcr4S16852.50||1);UPSTREAM(MODIFIER||4346||88|Jcr4…	T/T	T/T	T/T	T/T	T/T	T/T	T/T	T/T	T/C	T/T	T/C	T/T	T/T	T/T	T/T	T/T	T/T	T/C	T/T	T/C	T/C	T/C	T/T	T/T	T/T	T/C	T/T	T/T	T/T	T/T	T/C	T/T	T/T	T/T	T/T	T/T
Jcr4S01299	2255	Jcr4S01299_2255	-	-	-	-	-	-	-	A	C	AB=0.158917;ABP=6609.63;AC=92;AF=0.479167;AN=192;AO=1045;CIGAR=1X;DP=6686;DPRA=4.5676;EPP=2272.2;EPPR=8779.99;GTI=0;HWE=854.765;LEN=1;MEANALT=1;MQM=0.0162679;MQMR=0.0762276;NS=96;NUMALT=1;ODDS=0;PAIRED=0;PAIREDR=0;RO=5641;RPP=364.345;RPPR=12217.6;RUN=1;SAP=364.345;SRP=8809.42;TYPE=snp;XAI=9.86534e-06;XAM=0.000657668;XAS=0.000647802;XRI=1.47579e-05;XRM=0.00857549;XRS=0.00856073;technology.Illumina…	INTERGENIC(MODIFIER||||||||||1);UPSTREAM(MODIFIER||995||114|Jcr4S01299.10|protein_coding|CODING|Jcr4S01299.10||1)	A/A	A/A	A/A	A/A	A/A	A/A	A/A	A/A	A/C	A/C	A/A	A/A	A/A	A/A	A/C	A/A	A/A	A/A	A/A	A/C	A/A	A/A	A/C	A/A	A/C	A/A	A/A	A/A	A/A	A/A	A/A	A/A	A/A	A/A	A/C	A/C
Jcr4S16097	102	Jcr4S16097_102	-	-	-	-	-	-	-	T	G	AB=0.104986;ABP=4379.31;AC=68;AF=0.354167;AN=192;AO=380;CIGAR=1X;DP=4328;DPRA=1.39496;EPP=4.47319;EPPR=41.1221;GTI=0;HWE=73.8479;LEN=1;MEANALT=1.06742;MQM=0;MQMR=0;NS=96;NUMALT=1;ODDS=0;PAIRED=0;PAIREDR=0;RO=3941;RPP=671.39;RPPR=8560.78;RUN=1;SAP=4.86177;SRP=41.1221;TYPE=snp;XAI=0;XAM=0.00460721;XAS=0.00460721;XRI=1.41975e-05;XRM=0.00438557;XRS=0.00437137;technology.Illumina=1;BVAR;SURRSEQ=ACATGT…	NON_SYNONYMOUS_CODING(MODERATE|MISSENSE|Tat/Gat|Y34D|103|Jcr4S16097.10|protein_coding|CODING|Jcr4S16097.10|1|1|WARNING_TRANSCRIPT_NO_START_CODON);UPSTREAM(MODIFIER||2200||611|Jcr4S16097.20|protein_coding|CODING|Jcr4S16097.20||1)	T/T	T/T	T/T	T/T	T/T	T/T	T/T	T/T	T/T	T/T	T/T	T/T	T/T	T/T	T/T	T/G	T/T	T/T	T/T	T/T	T/T	T/T	T/T	T/T	T/T	T/T	T/T	T/T	T/T	T/T	T/T	T/T	T/T	T/T	T/T	T/T
Jcr4S09178	168	Jcr4S09178_168	-	-	-	-	-	-	-	T	C	AB=0.104261;ABP=4504.21;AC=55;AF=0.289474;AN=190;AO=466;CIGAR=1X;DP=6115;DPRA=1.7722;EPP=989.027;EPPR=269.242;GTI=0;HWE=-132.568;LEN=1;MEANALT=1.02198;MQM=0.214592;MQMR=24.9322;NS=95;NUMALT=1;ODDS=0;PAIRED=0;PAIREDR=0;RO=5646;RPP=1014.92;RPPR=12263.1;RUN=1;SAP=989.027;SRP=269.242;TYPE=snp;XAI=0;XAM=0.0104039;XAS=0.0104039;XRI=7.30377e-06;XRM=0.011585;XRS=0.0115777;technology.Illumina=1;BVAR;SURRS…	DOWNSTREAM(MODIFIER||156||98|Jcr4S09178.10|protein_coding|CODING|Jcr4S09178.10||1);INTERGENIC(MODIFIER||||||||||1)	T/T	T/T	T/T	T/T	T/T	T/T	T/T	T/T	T/T	T/T	T/T	T/T	T/T	T/T	T/T	T/T	T/T	T/T	T/T	T/T	T/T	T/T	T/T	T/T	T/T	T/T	T/T	T/T	T/T	T/T	T/C	T/T	T/T	T/T	T/T	T/T
Jcr4S18943	940	Jcr4S18943_940	-	-	-	-	-	-	-	CA	C	AB=0.0948827;ABP=2677.3;AC=34;AF=0.178947;AN=190;AO=288;CIGAR=1M1D;DP=5469;DPRA=1.23036;EPP=12.7819;EPPR=132.447;GTI=0;HWE=-302.101;LEN=1;MEANALT=2.14103;MQM=37;MQMR=37;NS=95;NUMALT=1;ODDS=0;PAIRED=0;PAIREDR=0;RO=4983;RPP=585.719;RPPR=9997.33;RUN=1;SAP=9.79615;SRP=56.6984;TYPE=del;XAI=0.0105526;XAM=0.011582;XAS=0.00102937;XRI=0.00035864;XRM=0.00112726;XRS=0.000768623;technology.Illumina=1;BVAR;SU…	INTERGENIC(MODIFIER||||||||||1)	CA/CA	CA/CA	CA/CA	CA/CA	CA/CA	CA/CA	CA/CA	CA/CA	CA/CA	CA/CA	CA/CA	CA/CA	CA/CA	CA/CA	CA/CA	CA/CA	CA/CA	CA/CA	CA/CA	CA/CA	CA/CA	CA/CA	CA/CA	CA/CA	CA/CA	CA/CA	CA/CA	CA/CA	./.	CA/CA	CA/CA	./.	CA/CA	CA/CA	CA/CA	CA/CA
Jcr4S11255	16648	Jcr4S11255_16648	-	-	-	-	-	-	-	A	G	AB=0.095499;ABP=3634.16;AC=39;AF=0.205263;AN=190;AO=360;CIGAR=1X;DP=6369;DPRA=1.34747;EPP=138.727;EPPR=6.13579;GTI=0;HWE=-280.93;LEN=1;MEANALT=1;MQM=36.8583;MQMR=36.9972;NS=95;NUMALT=1;ODDS=0;PAIRED=0;PAIREDR=0;RO=6009;RPP=524.381;RPPR=12982;RUN=1;SAP=157.426;SRP=5.15286;TYPE=snp;XAI=0.000951542;XAM=0.00711949;XAS=0.00616795;XRI=1.28898e-05;XRM=0.000656641;XRS=0.000643751;technology.Illumina=1;BV…	DOWNSTREAM(MODIFIER||1384||82|Jcr4S11255.40|protein_coding|CODING|Jcr4S11255.40||1);INTERGENIC(MODIFIER||||||||||1);UPSTREAM(MODIFIER||357||1889|Jcr4S11255.30|protein_coding|CODING|Jcr4S11255.30||1)	A/A	A/A	A/A	A/A	A/A	A/A	A/A	A/A	A/A	A/A	A/A	A/A	A/A	A/A	A/A	A/A	A/A	A/A	A/A	A/A	A/A	A/A	A/A	A/G	A/A	A/A	A/A	A/A	A/A	A/A	A/A	A/A	A/A	A/A	A/A	A/A
Jcr4S02639	2597	Jcr4S02639_2597	-	-	-	-	-	-	-	A	G	AB=0.114306;ABP=7147.08;AC=85;AF=0.442708;AN=192;AO=667;CIGAR=1X;DP=6199;DPRA=21.7404;EPP=1282.87;EPPR=26.9711;GTI=0;HWE=544.451;LEN=1;MEANALT=1.02105;MQM=0;MQMR=36.87;NS=96;NUMALT=1;ODDS=0;PAIRED=0;PAIREDR=0;RO=5529;RPP=1451.38;RPPR=11476.6;RUN=1;SAP=1282.87;SRP=20.4956;TYPE=snp;XAI=0;XAM=0.0101785;XAS=0.0101785;XRI=5.59375e-06;XRM=0.000753804;XRS=0.00074821;technology.Illumina=1;BVAR;SURRSEQ=TA…	INTERGENIC(MODIFIER||||||||||1);UPSTREAM(MODIFIER||1345||150|Jcr4S02639.10|protein_coding|CODING|Jcr4S02639.10||1);UPSTREAM(MODIFIER||1485||107|Jcr4S02639.20|protein_coding|CODING|Jcr4S02639.20||1)	A/A	A/A	A/A	A/A	A/A	A/A	A/A	A/A	A/A	A/A	A/A	A/A	A/A	A/A	A/A	A/A	A/A	A/A	A/A	A/A	A/A	A/A	A/A	A/A	A/A	A/A	A/A	A/A	A/A	A/A	A/A	A/A	A/A	A/A	A/A	A/A
Jcr4S02639	2667	Jcr4S02639_2667	-	-	-	-	-	-	-	A	C	AB=0.107381;ABP=7621.49;AC=85;AF=0.442708;AN=192;AO=642;CIGAR=1X;DP=6332;DPRA=22.207;EPP=1388.42;EPPR=19.8402;GTI=0;HWE=544.451;LEN=1;MEANALT=1;MQM=0.143302;MQMR=35.2327;NS=96;NUMALT=1;ODDS=0;PAIRED=0;PAIREDR=0;RO=5690;RPP=1397.1;RPPR=12358.7;RUN=1;SAP=1388.42;SRP=19.8402;TYPE=snp;XAI=0;XAM=0.0102373;XAS=0.0102373;XRI=9.68823e-06;XRM=0.000997919;XRS=0.000988231;technology.Illumina=1;BVAR;SURRSEQ=…	INTERGENIC(MODIFIER||||||||||1);UPSTREAM(MODIFIER||1415||107|Jcr4S02639.20|protein_coding|CODING|Jcr4S02639.20||1);UPSTREAM(MODIFIER||1415||150|Jcr4S02639.10|protein_coding|CODING|Jcr4S02639.10||1)	A/A	A/A	A/A	A/A	A/A	A/A	A/A	A/A	A/A	A/A	A/A	A/A	A/A	A/A	A/A	A/A	A/A	A/A	A/A	A/A	A/A	A/A	A/A	A/A	A/A	A/A	A/A	A/A	A/A	A/A	A/A	A/A	A/A	A/A	A/A	A/A
Jcr4S12125	4458	Jcr4S12125_4458	-	-	-	-	-	-	-	G	T	AB=0.107798;ABP=4080.74;AC=69;AF=0.359375;AN=192;AO=361;CIGAR=1X;DP=3984;DPRA=1.96081;EPP=786.912;EPPR=7861.57;GTI=0;HWE=94.7004;LEN=1;MEANALT=1.03333;MQM=0;MQMR=0;NS=96;NUMALT=1;ODDS=0;PAIRED=0;PAIREDR=0;RO=3619;RPP=786.912;RPPR=7861.57;RUN=1;SAP=786.912;SRP=7861.57;TYPE=snp;XAI=0;XAM=0.0103397;XAS=0.0103397;XRI=0.000591865;XRM=0.00896582;XRS=0.00837395;technology.Illumina=1;BVAR;SURRSEQ=AACTTTT…	INTERGENIC(MODIFIER||||||||||1);UPSTREAM(MODIFIER||1223||521|Jcr4S12125.20|protein_coding|CODING|Jcr4S12125.20||1);UPSTREAM(MODIFIER||1870||618|Jcr4S12125.10|protein_coding|CODING|Jcr4S12125.10||1);UPSTREAM(MODIFIER||4568||317|Jcr4S12125.30|protein_coding|CODING|Jcr4S12125.30||1)	G/G	G/G	G/G	G/G	G/G	G/G	G/G	G/G	G/G	G/G	G/G	G/G	G/G	G/G	G/G	G/G	G/G	G/G	G/G	G/G	G/G	G/G	G/G	G/G	G/G	G/G	G/G	G/G	./.	G/G	G/G	./.	G/G	G/G	G/G	G/G
Jcr4S16833	5248	Jcr4S16833_5248	-	-	-	-	-	-	-	C	T	AB=0.113417;ABP=8758.51;AC=86;AF=0.447917;AN=192;AO=797;CIGAR=1X;DP=7417;DPRA=26.014;EPP=3.99387;EPPR=7.89398;GTI=0;HWE=582.426;LEN=1;MEANALT=1.01053;MQM=0;MQMR=0;NS=96;NUMALT=1;ODDS=0;PAIRED=0;PAIREDR=0;RO=6618;RPP=1733.67;RPPR=14243.8;RUN=1;SAP=3.99387;SRP=6.5592;TYPE=snp;XAI=0;XAM=0.0104186;XAS=0.0104186;XRI=1.55939e-05;XRM=0.00229032;XRS=0.00227473;technology.Illumina=1;BVAR;SURRSEQ=ACGGCCGTG…	DOWNSTREAM(MODIFIER||1842||735|Jcr4S16833.10|protein_coding|CODING|Jcr4S16833.10||1)	C/C	C/C	C/C	C/C	C/C	C/C	C/C	C/C	C/C	C/C	C/C	C/C	C/C	C/C	C/C	C/C	C/C	C/C	C/C	C/C	C/C	C/C	C/C	C/C	C/C	C/C	C/C	C/C	./.	C/C	C/C	./.	C/C	C/C	C/C	C/C
Jcr4S16833	5259	Jcr4S16833_5259	-	-	-	-	-	-	-	C	T	AB=0.113043;ABP=8977.04;AC=88;AF=0.458333;AN=192;AO=802;CIGAR=1X;DP=7424;DPRA=2.30163;EPP=3.54098;EPPR=4.03865;GTI=0;HWE=663.709;LEN=1;MEANALT=1;MQM=0;MQMR=0;NS=96;NUMALT=1;ODDS=0;PAIRED=0;PAIREDR=0;RO=6622;RPP=1744.53;RPPR=14373.8;RUN=1;SAP=3.54098;SRP=3.96651;TYPE=snp;XAI=0;XAM=0.010337;XAS=0.010337;XRI=1.55844e-05;XRM=0.0022796;XRS=0.00226402;technology.Illumina=1;BVAR;SURRSEQ=ACAAGGGTCCCTAGGC…	DOWNSTREAM(MODIFIER||1853||735|Jcr4S16833.10|protein_coding|CODING|Jcr4S16833.10||1)	C/C	C/C	C/C	C/C	C/C	C/C	C/C	C/C	C/C	C/C	C/C	C/C	C/C	C/C	C/C	C/C	C/C	C/C	C/C	C/C	C/C	C/C	C/C	C/C	C/C	C/C	C/C	C/C	./.	C/C	C/C	./.	C/C	C/C	C/C	C/C
Jcr4S26421	188	Jcr4S26421_188	-	-	-	-	-	-	-	T	C	AB=0.853195;ABP=630.378;AC=171;AF=0.9;AN=190;AO=3565;CIGAR=1X;DP=3743;DPRA=19.8989;EPP=7744.31;EPPR=380.895;GTI=0;HWE=-480.543;LEN=1;MEANALT=1;MQM=35.7478;MQMR=8.79213;NS=95;NUMALT=1;ODDS=0;PAIRED=0;PAIREDR=0;RO=178;RPP=7744.31;RPPR=389.532;RUN=1;SAP=7744.31;SRP=380.895;TYPE=snp;XAI=9.04529e-06;XAM=0.000714081;XAS=0.000705036;XRI=0;XRM=0.0140097;XRS=0.0140097;technology.Illumina=1;BVAR;SURRSEQ=AA…	INTERGENIC(MODIFIER||||||||||1)	C/C	C/C	./.	C/C	C/C	C/C	C/C	C/C	C/C	C/C	C/C	C/C	C/C	C/C	C/C	C/C	C/C	C/C	C/C	C/C	C/C	C/C	C/C	C/C	C/C	C/C	./.	C/C	T/C	C/C	C/C	./.	C/C	C/C	C/C	C/C
Jcr4S20611	945	Jcr4S20611_945	-	-	-	-	-	-	-	CA	C	AB=0.83682;ABP=474.029;AC=180;AF=0.9375;AN=192;AO=3466;CIGAR=1M1D;DP=3599;DPRA=0;EPP=6817.4;EPPR=7.88659;GTI=0;HWE=-238.773;LEN=1;MEANALT=1.1875;MQM=36.895;MQMR=15.9035;NS=96;NUMALT=1;ODDS=0;PAIRED=0;PAIREDR=0;RO=114;RPP=6817.4;RPPR=233.491;RUN=1;SAP=7529.33;SRP=5.75321;TYPE=del;XAI=0.0101027;XAM=0.0108228;XAS=0.000720045;XRI=0.000551161;XRM=0.00288803;XRS=0.00233687;technology.Illumina=1;BVAR;SU…	INTERGENIC(MODIFIER||||||||||1);UPSTREAM(MODIFIER||529||115|Jcr4S20611.10|protein_coding|CODING|Jcr4S20611.10||1)	C/C	C/C	C/C	C/C	C/C	C/C	C/C	C/C	C/C	C/C	C/C	C/C	C/C	C/C	C/C	C/C	C/C	C/C	C/C	C/C	C/C	C/C	C/C	C/C	C/C	C/C	C/C	C/C	CA/C	C/C	C/C	CA/C	C/C	C/C	C/C	C/C
Jcr4U29584	957	Jcr4U29584_957	-	-	-	-	-	-	-	T	G	AB=0.13521;ABP=11663.2;AC=91;AF=0.473958;AN=192;AO=1379;CIGAR=1X;DP=10386;DPRA=36.4316;EPP=2997.47;EPPR=19559.3;GTI=0;HWE=802.493;LEN=1;MEANALT=1.01053;MQM=0;MQMR=0;NS=96;NUMALT=1;ODDS=0;PAIRED=0;PAIREDR=0;RO=9006;RPP=2997.47;RPPR=19559.3;RUN=1;SAP=2997.47;SRP=19559.3;TYPE=snp;XAI=7.47591e-06;XAM=0.00554058;XAS=0.00553311;XRI=5.74741e-06;XRM=0.00919197;XRS=0.00918622;technology.Illumina=1;BVAR;SU…	UPSTREAM(MODIFIER||175||141|Jcr4U29584.10|protein_coding|CODING|Jcr4U29584.10||1)	T/T	T/T	T/T	T/T	T/T	T/T	T/T	T/T	T/T	T/T	T/T	T/T	T/T	T/T	T/T	T/T	T/T	T/T	T/T	T/T	T/T	T/G	T/T	T/T	T/T	T/T	T/G	T/T	./.	T/T	T/T	T/T	T/T	T/T	T/T	T/T
Jcr4S04931	1055	Jcr4S04931_1055	GO:0015074;GO:0003676	DNA integration	-	nucleic acid binding	-	-	-	A	C	AB=0.116673;ABP=3470.72;AC=72;AF=0.375;AN=192;AO=337;CIGAR=1X;DP=3407;DPRA=1.81622;EPP=734.797;EPPR=6660.75;GTI=0;HWE=161.506;LEN=1;MEANALT=1;MQM=0;MQMR=0;NS=96;NUMALT=1;ODDS=0;PAIRED=0;PAIREDR=0;RO=3070;RPP=734.797;RPPR=6669.43;RUN=1;SAP=734.797;SRP=6660.75;TYPE=snp;XAI=0;XAM=0.0103242;XAS=0.0103242;XRI=3.35807e-06;XRM=0.0120525;XRS=0.0120491;technology.Illumina=1;BVAR;SURRSEQ=TGTATTTGGTTCCACTGC…	NON_SYNONYMOUS_CODING(MODERATE|MISSENSE|Aag/Cag|K301Q|850|Jcr4S04931.10|protein_coding|CODING|Jcr4S04931.10|1|1|WARNING_TRANSCRIPT_NO_START_CODON);UPSTREAM(MODIFIER||4629||338|Jcr4S04931.20|protein_coding|CODING|Jcr4S04931.20||1)	A/A	A/A	A/A	A/A	A/A	A/A	A/A	A/A	./.	./.	A/A	A/A	A/A	A/A	A/A	A/A	A/A	./.	./.	A/A	A/A	A/A	A/A	A/A	A/A	A/A	A/A	A/A	./.	A/A	A/A	./.	A/A	A/A	A/A	A/A
Jcr4S12125	4457	Jcr4S12125_4457	-	-	-	-	-	-	-	T	G	AB=0.110878;ABP=3763.12;AC=66;AF=0.34375;AN=192;AO=363;CIGAR=1X;DP=4006;DPRA=5.96252;EPP=791.255;EPPR=7865.91;GTI=0;HWE=34.1436;LEN=1;MEANALT=1.21739;MQM=0;MQMR=0;NS=96;NUMALT=1;ODDS=0;PAIRED=0;PAIREDR=0;RO=3621;RPP=791.255;RPPR=7865.91;RUN=1;SAP=791.255;SRP=7865.91;TYPE=snp;XAI=0.00577051;XAM=0.0106216;XAS=0.00485114;XRI=2.16235e-05;XRM=0.00890978;XRS=0.00888816;technology.Illumina=1;BVAR;SURRSE…	INTERGENIC(MODIFIER||||||||||1);UPSTREAM(MODIFIER||1224||521|Jcr4S12125.20|protein_coding|CODING|Jcr4S12125.20||1);UPSTREAM(MODIFIER||1869||618|Jcr4S12125.10|protein_coding|CODING|Jcr4S12125.10||1);UPSTREAM(MODIFIER||4569||317|Jcr4S12125.30|protein_coding|CODING|Jcr4S12125.30||1)	T/T	T/T	T/T	T/T	T/T	T/T	T/T	T/T	T/T	T/T	T/T	T/T	T/T	T/T	T/T	T/T	T/T	T/T	T/T	T/T	T/T	T/T	T/T	T/T	T/T	T/T	T/T	T/T	./.	T/T	T/T	./.	T/T	T/T	T/T	T/T
Jcr4S00101	9233	Jcr4S00101_9233	-	-	-	-	-	-	-	T	C	AB=0.107108;ABP=6850.43;AC=77;AF=0.401042;AN=192;AO=610;CIGAR=1X;DP=6265;DPRA=65.9368;EPP=1327.61;EPPR=7893.3;GTI=0;HWE=288.598;LEN=1;MEANALT=1;MQM=0.181967;MQMR=23.1583;NS=96;NUMALT=1;ODDS=0;PAIRED=0;PAIREDR=0;RO=5655;RPP=1327.61;RPPR=827.143;RUN=1;SAP=1327.61;SRP=2517.57;TYPE=snp;XAI=0;XAM=0.0102553;XAS=0.0102553;XRI=9.13418e-06;XRM=0.0135692;XRS=0.0135601;technology.Illumina=1;BVAR;SURRSEQ=ATT…	DOWNSTREAM(MODIFIER||432||1669|Jcr4S00101.10|protein_coding|CODING|Jcr4S00101.10||1);INTERGENIC(MODIFIER||||||||||1)	T/T	T/T	T/T	T/T	T/T	T/T	T/T	T/T	T/T	T/T	T/T	T/T	T/T	T/T	T/T	T/T	T/T	T/T	T/T	T/T	T/T	T/T	T/T	T/T	T/T	T/T	T/T	T/C	T/T	T/T	T/T	T/T	T/T	T/T	T/T	T/T
Jcr4S03809	5190	Jcr4S03809_5190	-	-	-	-	-	-	-	A	C	AB=0.12376;ABP=4463.81;AC=83;AF=0.436842;AN=190;AO=468;CIGAR=1X;DP=4093;DPRA=3.94778;EPP=1010.59;EPPR=7874.6;GTI=0;HWE=498.237;LEN=1;MEANALT=1;MQM=0;MQMR=0;NS=95;NUMALT=1;ODDS=0;PAIRED=0;PAIREDR=0;RO=3625;RPP=1010.59;RPPR=7874.6;RUN=1;SAP=1019.26;SRP=7874.6;TYPE=snp;XAI=0;XAM=0.000479679;XAS=0.000479679;XRI=0.000605376;XRM=0.010035;XRS=0.00942963;technology.Illumina=1;BVAR;SURRSEQ=AATAACGTTTTATGT…	INTERGENIC(MODIFIER||||||||||1);UPSTREAM(MODIFIER||1652||900|Jcr4S03809.20|protein_coding|CODING|Jcr4S03809.20||1);UPSTREAM(MODIFIER||2786||79|Jcr4S03809.10|protein_coding|CODING|Jcr4S03809.10||1)	A/A	A/A	A/A	A/C	A/A	A/A	A/A	A/A	A/A	A/A	A/A	A/A	A/A	A/A	A/A	A/A	A/A	A/A	A/A	A/A	A/A	A/A	A/A	A/A	A/A	A/A	A/A	A/A	./.	A/A	A/A	./.	A/A	A/A	A/A	A/A
Jcr4S26884	5620	Jcr4S26884_5620	-	-	-	-	-	-	-	G	A	AB=0.140562;ABP=1958.97;AC=34;AF=0.177083;AN=192;AO=286;CIGAR=1X;DP=4250;DPRA=1.3773;EPP=624.051;EPPR=251.862;GTI=0;HWE=-306.326;LEN=1;MEANALT=1;MQM=22.8462;MQMR=36.6382;NS=96;NUMALT=1;ODDS=0;PAIRED=0;PAIREDR=0;RO=3964;RPP=32.1961;RPPR=8352.12;RUN=1;SAP=32.1961;SRP=263.817;TYPE=snp;XAI=0.0102569;XAM=0.0109794;XAS=0.00072247;XRI=0.000205537;XRM=0.0151054;XRS=0.0148999;technology.Illumina=1;BVAR;SU…	INTERGENIC(MODIFIER||||||||||1);UPSTREAM(MODIFIER||788||549|Jcr4S26884.20|protein_coding|CODING|Jcr4S26884.20||1)	G/G	G/G	G/G	G/G	G/G	G/G	G/G	G/G	G/G	G/G	G/G	G/G	G/G	G/G	G/G	G/G	G/G	G/G	G/G	G/G	G/G	G/G	G/G	G/G	G/G	G/G	G/G	G/G	G/A	G/G	G/G	G/G	G/G	G/G	G/G	G/G
Jcr4S13101	2531	Jcr4S13101_2531	-	-	-	-	-	-	-	A	C	AB=0.12562;ABP=3685.7;AC=78;AF=0.410526;AN=190;AO=400;CIGAR=1X;DP=3581;DPRA=1.94853;EPP=871.599;EPPR=6901.78;GTI=0;HWE=336.871;LEN=1;MEANALT=1;MQM=0;MQMR=0;NS=95;NUMALT=1;ODDS=0;PAIRED=0;PAIREDR=0;RO=3181;RPP=871.599;RPPR=6901.78;RUN=1;SAP=871.599;SRP=6910.46;TYPE=snp;XAI=0;XAM=0.0104114;XAS=0.0104114;XRI=6.48178e-06;XRM=0.00775168;XRS=0.0077452;technology.Illumina=1;BVAR;SURRSEQ=TGGCAAAATAATGTCT…	UPSTREAM(MODIFIER||1358||287|Jcr4S13101.10|protein_coding|CODING|Jcr4S13101.10||1)	A/A	A/A	A/A	A/A	A/A	A/A	A/A	A/A	A/A	A/A	A/A	A/A	A/A	A/A	A/A	A/A	A/A	A/A	A/A	A/A	A/A	A/A	A/A	./.	A/A	A/A	A/A	A/A	./.	A/A	A/A	./.	A/A	A/A	A/C	A/A
Jcr4S13101	2565	Jcr4S13101_2565	-	-	-	-	-	-	-	C	A	AB=0.126117;ABP=3671.07;AC=78;AF=0.410526;AN=190;AO=402;CIGAR=1X;DP=3572;DPRA=1.94352;EPP=875.942;EPPR=6886.58;GTI=0;HWE=336.871;LEN=1;MEANALT=1;MQM=0;MQMR=0;NS=95;NUMALT=1;ODDS=0;PAIRED=0;PAIREDR=0;RO=3170;RPP=875.942;RPPR=6886.58;RUN=1;SAP=875.942;SRP=6886.58;TYPE=snp;XAI=0;XAM=0.0104221;XAS=0.0104221;XRI=6.50428e-06;XRM=0.00774129;XRS=0.00773479;technology.Illumina=1;BVAR;SURRSEQ=TATATCTTTACTT…	UPSTREAM(MODIFIER||1392||287|Jcr4S13101.10|protein_coding|CODING|Jcr4S13101.10||1)	C/C	C/C	C/C	C/C	C/C	C/C	C/C	C/C	C/C	C/C	C/C	C/C	C/C	C/C	C/C	C/C	C/C	C/C	C/C	C/C	C/C	C/C	C/C	./.	C/C	C/C	C/C	C/C	./.	C/C	C/C	./.	C/C	C/C	C/A	C/C
Jcr4S20588	3367	Jcr4S20588_3367	-	-	-	-	-	-	-	G	A	AB=0.118185;ABP=3742.26;AC=74;AF=0.385417;AN=192;AO=380;CIGAR=1X;DP=3645;DPRA=3.8871;EPP=828.17;EPPR=3752.44;GTI=0;HWE=209.83;LEN=1;MEANALT=1.01075;MQM=0;MQMR=12.455;NS=96;NUMALT=1;ODDS=0;PAIRED=0;PAIREDR=0;RO=3264;RPP=828.17;RPPR=7090.7;RUN=1;SAP=828.17;SRP=3752.44;TYPE=snp;XAI=0;XAM=0.000840686;XAS=0.000840686;XRI=6.31696e-06;XRM=0.0021928;XRS=0.00218649;technology.Illumina=1;BVAR;SURRSEQ=TAGCG…	DOWNSTREAM(MODIFIER||1516||300|Jcr4S20588.20|protein_coding|CODING|Jcr4S20588.20||1);DOWNSTREAM(MODIFIER||284||157|Jcr4S20588.10|protein_coding|CODING|Jcr4S20588.10||1);INTERGENIC(MODIFIER||||||||||1)	G/G	./.	G/G	G/G	G/G	G/G	G/G	G/G	G/G	./.	G/G	G/G	G/G	G/G	G/G	G/G	G/G	G/G	./.	G/G	G/G	G/G	./.	G/G	G/G	G/G	G/G	G/G	G/G	G/G	G/G	G/G	G/G	G/G	G/G	G/G
Jcr4S06060	5233	Jcr4S06060_5233	GO:0003676	-	-	nucleic acid binding	-	-	-	A	G	AB=0.863051;ABP=1691.67;AC=149;AF=0.784211;AN=190;AO=3123;CIGAR=1X;DP=3364;DPRA=0;EPP=6775.84;EPPR=272.167;GTI=0;HWE=-269.132;LEN=1;MEANALT=1.11579;MQM=0;MQMR=0;NS=95;NUMALT=1;ODDS=0;PAIRED=0;PAIREDR=0;RO=225;RPP=3.37812;RPPR=491.592;RUN=1;SAP=3.31693;SRP=272.167;TYPE=snp;XAI=2.32107e-05;XAM=0.0102882;XAS=0.010265;XRI=0;XRM=0.0073451;XRS=0.0073451;technology.Illumina=1;BVAR;SURRSEQ=ATGTTGTAACAAGA…	SYNONYMOUS_CODING(LOW|SILENT|caA/caG|Q281|1948|Jcr4S06060.10|protein_coding|CODING|Jcr4S06060.10|4|1)	G/G	G/G	G/G	G/G	./.	G/G	./.	G/G	./.	./.	G/G	G/G	G/G	G/G	G/G	G/G	G/G	./.	G/G	G/G	G/G	G/G	G/G	A/G	G/G	G/G	./.	G/G	G/G	G/G	G/G	G/G	G/G	G/G	G/G	G/G
Jcr4S08366	2157	Jcr4S08366_2157	-	-	-	-	-	-	-	T	A	AB=0.12886;ABP=3141.26;AC=79;AF=0.411458;AN=192;AO=349;CIGAR=1X;DP=3055;DPRA=1.64489;EPP=85.296;EPPR=7.64877;GTI=0;HWE=345.748;LEN=1;MEANALT=1;MQM=0;MQMR=0.836169;NS=96;NUMALT=1;ODDS=0;PAIRED=0;PAIREDR=0;RO=2704;RPP=760.854;RPPR=5874.67;RUN=1;SAP=85.296;SRP=7.64877;TYPE=snp;XAI=0;XAM=0.0138617;XAS=0.0138617;XRI=0;XRM=0.00441627;XRS=0.00441627;technology.Illumina=1;BVAR;SURRSEQ=CATTAATGGAAGCACATGT…	DOWNSTREAM(MODIFIER||1127||202|Jcr4S08366.20|protein_coding|CODING|Jcr4S08366.20||1);DOWNSTREAM(MODIFIER||3941||85|Jcr4S08366.30|protein_coding|CODING|Jcr4S08366.30||1);SYNONYMOUS_CODING(LOW|SILENT|ccT/ccA|P399|442|Jcr4S08366.10|protein_coding|CODING|Jcr4S08366.10|4|1|WARNING_TRANSCRIPT_NO_START_CODON)	T/T	T/T	T/T	T/T	T/T	T/T	T/T	T/T	./.	T/T	T/T	T/T	T/T	T/T	./.	T/T	./.	./.	T/T	T/T	T/T	T/T	T/T	./.	./.	T/T	T/T	T/T	T/T	T/T	./.	T/T	T/T	T/T	T/T	T/A
Jcr4S00218	9718	Jcr4S00218_9718	-	-	-	-	-	-	-	C	A	AB=0.135741;ABP=7406.57;AC=90;AF=0.46875;AN=192;AO=882;CIGAR=1X;DP=6655;DPRA=35.3777;EPP=3.16787;EPPR=22.7424;GTI=0;HWE=753.559;LEN=1;MEANALT=1.01064;MQM=19.6825;MQMR=19.5358;NS=96;NUMALT=1;ODDS=0;PAIRED=0;PAIREDR=0;RO=5771;RPP=1857.93;RPPR=12534.6;RUN=1;SAP=4.2019;SRP=22.7424;TYPE=snp;XAI=0;XAM=0.0120735;XAS=0.0120735;XRI=9.91298e-06;XRM=0.00680884;XRS=0.00679892;technology.Illumina=1;BVAR;SURRS…	DOWNSTREAM(MODIFIER||4558||81|Jcr4S00218.20|protein_coding|CODING|Jcr4S00218.20||1);INTRON(MODIFIER||||1714|Jcr4S00218.30|protein_coding|CODING|Jcr4S00218.30|8|1)	C/C	C/C	C/C	C/C	C/C	C/C	C/C	C/C	C/C	C/C	C/C	C/C	C/C	C/C	C/C	C/A	C/C	C/C	C/C	C/C	C/A	C/C	C/A	C/C	C/C	C/A	C/C	C/C	./.	C/C	C/C	C/C	C/C	C/C	C/A	C/C
Jcr4S00218	9728	Jcr4S00218_9728	-	-	-	-	-	-	-	C	T	AB=0.135622;ABP=7426.39;AC=90;AF=0.46875;AN=192;AO=883;CIGAR=1X;DP=6668;DPRA=35.4468;EPP=3.01276;EPPR=17.5828;GTI=0;HWE=753.559;LEN=1;MEANALT=1.01064;MQM=19.6942;MQMR=19.5535;NS=96;NUMALT=1;ODDS=0;PAIRED=0;PAIREDR=0;RO=5783;RPP=1920.42;RPPR=12560.6;RUN=1;SAP=3.01276;SRP=17.5828;TYPE=snp;XAI=0;XAM=0.0121644;XAS=0.0121644;XRI=9.89241e-06;XRM=0.00681683;XRS=0.00680694;technology.Illumina=1;BVAR;SURR…	DOWNSTREAM(MODIFIER||4568||81|Jcr4S00218.20|protein_coding|CODING|Jcr4S00218.20||1);INTRON(MODIFIER||||1714|Jcr4S00218.30|protein_coding|CODING|Jcr4S00218.30|8|1)	C/C	C/C	C/C	C/C	C/C	C/C	C/C	C/C	C/C	C/C	C/C	C/C	C/C	C/C	C/C	C/T	C/C	C/C	C/C	C/C	C/T	C/C	C/T	C/C	C/C	C/T	C/C	C/C	./.	C/C	C/C	C/C	C/C	C/C	C/T	C/C
Jcr4S06501	9074	Jcr4S06501_9074	-	-	-	-	-	-	-	A	G	AB=0.776676;ABP=1947.18;AC=128;AF=0.673684;AN=190;AO=3602;CIGAR=1X;DP=4278;DPRA=0;EPP=7824.65;EPPR=3.33248;GTI=0;HWE=-26.4166;LEN=1;MEANALT=1.02105;MQM=37;MQMR=37;NS=95;NUMALT=1;ODDS=0;PAIRED=0;PAIREDR=0;RO=674;RPP=7824.65;RPPR=1466.58;RUN=1;SAP=7824.65;SRP=3.33248;TYPE=snp;XAI=0;XAM=0.0102013;XAS=0.0102013;XRI=0;XRM=0.000604714;XRS=0.000604714;technology.Illumina=1;BVAR;SURRSEQ=AGATAGCGGGCATGGTG…	DOWNSTREAM(MODIFIER||1268||129|Jcr4S06501.20|protein_coding|CODING|Jcr4S06501.20||1)	G/G	G/G	./.	G/G	G/G	G/G	G/G	A/G	G/G	./.	A/G	G/G	G/G	G/G	G/G	G/G	G/G	G/G	./.	A/G	A/G	G/G	G/G	G/G	G/G	G/G	G/G	A/G	A/G	G/G	./.	A/G	G/G	G/G	A/G	G/G
Jcr4S06501	9077	Jcr4S06501_9077	-	-	-	-	-	-	-	G	C	AB=0.776356;ABP=1972.53;AC=127;AF=0.668421;AN=190;AO=3581;CIGAR=1X;DP=4270;DPRA=0;EPP=7779.05;EPPR=3.02304;GTI=0;HWE=-8.96277;LEN=1;MEANALT=1.06316;MQM=37;MQMR=37;NS=95;NUMALT=1;ODDS=0;PAIRED=0;PAIREDR=0;RO=682;RPP=7779.05;RPPR=1483.95;RUN=1;SAP=7779.05;SRP=3.02304;TYPE=snp;XAI=0;XAM=0.0103038;XAS=0.0103038;XRI=0;XRM=0.000768187;XRS=0.000768187;technology.Illumina=1;BVAR;SURRSEQ=TAGCGGGCATGGTGAAC…	DOWNSTREAM(MODIFIER||1271||129|Jcr4S06501.20|protein_coding|CODING|Jcr4S06501.20||1)	C/C	C/C	./.	C/C	C/C	C/C	C/C	G/C	C/C	G/C	G/C	C/C	C/C	C/C	C/C	C/C	C/C	C/C	./.	G/C	G/C	C/C	C/C	C/C	C/C	C/C	C/C	G/C	G/C	C/C	./.	G/C	C/C	C/C	G/C	C/C
Jcr4U29091	493	Jcr4U29091_493	-	-	-	-	-	-	-	T	G	AB=0.124756;ABP=3757.76;AC=82;AF=0.431579;AN=190;AO=395;CIGAR=1X;DP=3576;DPRA=1.18407;EPP=860.742;EPPR=6910.46;GTI=0;HWE=463.456;LEN=1;MEANALT=1;MQM=0;MQMR=0;NS=95;NUMALT=1;ODDS=0;PAIRED=0;PAIREDR=0;RO=3181;RPP=860.742;RPPR=6910.46;RUN=1;SAP=860.742;SRP=6910.46;TYPE=snp;XAI=0;XAM=0.0104398;XAS=0.0104398;XRI=9.72337e-06;XRM=0.00780894;XRS=0.00779922;technology.Illumina=1;BVAR;SURRSEQ=GGGTTGGAAAGAT…	INTERGENIC(MODIFIER||||||||||1)	T/T	T/T	T/T	T/T	T/T	T/T	T/T	T/T	T/T	./.	T/T	T/T	T/T	T/T	T/T	T/T	T/T	./.	T/T	T/T	T/T	T/T	T/T	./.	T/T	T/T	T/T	T/T	./.	T/G	T/T	./.	T/T	T/T	./.	T/T
Jcr4S04843	20291	Jcr4S04843_20291	-	-	-	-	-	-	-	A	T	AB=0.130628;ABP=3740.71;AC=82;AF=0.431579;AN=190;AO=429;CIGAR=1X;DP=3562;DPRA=2.85551;EPP=934.572;EPPR=6368.29;GTI=0;HWE=463.456;LEN=1;MEANALT=1.01099;MQM=0;MQMR=0;NS=95;NUMALT=1;ODDS=0;PAIRED=0;PAIREDR=0;RO=3132;RPP=934.572;RPPR=6368.29;RUN=1;SAP=934.572;SRP=6804.06;TYPE=snp;XAI=0;XAM=0.000749468;XAS=0.000749468;XRI=9.87479e-06;XRM=0.000749847;XRS=0.000739972;technology.Illumina=1;BVAR;SURRSEQ=T…	UPSTREAM(MODIFIER||248||1354|Jcr4S04843.40|protein_coding|CODING|Jcr4S04843.40||1)	A/A	A/A	A/A	A/A	A/A	./.	A/A	A/A	A/A	A/A	A/A	A/A	A/A	./.	A/A	A/A	A/A	A/A	A/A	A/A	A/A	A/A	A/A	A/A	A/A	A/A	A/A	A/A	./.	A/A	A/A	./.	A/A	A/A	A/A	A/A
[truncated: 47 more columns]
